# Supplementary material for: Integrative Small RNA and Transcriptome Analysis Provides Insight Into Key Role of Mir408 Towards Drought Tolerance Response in Cowpea
Source: Research Square preprint supplement (doi:10.21203/rs.3.rs-462359/v1), 2021-05-05
Supplement: Supplementary file 1 [file 4b9c2a2bd10899fb4d284ae5.xlsx]

## Sheet: CL vs DL
Table S5a. Differentially expressed drought induced miRNAs (DE) in leaf (control:CL and drought stressed: DL sRNA libraries) of cowpea.
Sl. No.	miRNA ID	CL Expression	DL Expression	FoldChange	log2FoldChange	P Value	Adjusted P Value	Regulation	Sequence
1	vun-miR1511	2266	682	0.300971	-1.7323	0.617942	1	DOWN	AACCAGGCUCUGAUACCAUG
2	vun-miR1511-5p	84	17	0.202381	-2.30485	0.41714	1	DOWN	UAACUUGACUCUGAUACCA
3	vun-miR1512a-5p	3	10	3.33333	1.73697	0.443519	1	UP	UACUUUAAGAUUUUUCAGUU
4	vun-miR156	1862	4	0.00214823	-8.86264	0.0497986	1	DOWN	CUGACAGAAGAGAGUGAGCAC
5	vun-miR156a	12464	32	0.00256739	-8.60548	0.0495184	1	DOWN	UGACAGAAGAGAGUGAGCACA
6	vun-miR156a	12	33	2.75	1.45943	0.548206	1	UP	CGACAGAAGAGAGUGAGCAC
7	vun-miR156b-3p	2	52	26	4.70044	0.105656	1	UP	GCUCACGUCUCUUUCUGUCAGU
8	vun-miR156c	22	47	2.13636	1.09516	0.670322	1	UP	UGUCAGAAGAGAGUGAGCAC
9	vun-miR156c-3p	3	62	20.6667	4.36923	0.131296	1	UP	UGCUUACUCUCUAUCUGUCACC
10	vun-miR156d-3p	18	2	0.111111	-3.16993	0.189564	1	DOWN	GCUCACUUCUCUGUCUGUCA
11	vun-miR156e	7	32	4.57143	2.19265	0.370061	1	UP	UGACAGAAGAGAGCGAGCAC
12	vun-miR156i-3p	473	92	0.194503	-2.36213	0.494761	1	DOWN	UGCUCACUUCUCUUUCUGUCA
13	vun-miR156j	39	118	3.02564	1.59724	0.599042	1	UP	UUGACAGAAGAGAGUGAGCAC
14	vun-miR156k	4	15	3.75	1.90689	0.397505	1	UP	UGACAGAAGAGAGGGAGCAC
15	vun-miR156k-3p	1	38	38	5.24793	0.0812246	1	UP	GCUCGCUUCUCUUUCUGUCAG
16	vun-miR156l-3p	1	7	7	2.80735	0.260755	1	UP	GCUCACUUCUCUUUCUGUCAG
17	vun-miR156w	11	2502	227.455	7.82943	0.0699235	1	UP	UUGACAGAAGAGAGAGAGCAC
18	vun-miR157d-3p	1301	361	0.277479	-1.84955	0.594355	1	DOWN	GCUCUCUAGGCUUCUGUCAUC
19	vun-miR159b	21	3	0.142857	-2.80735	0.243333	1	DOWN	UUUGGAUUGAAGGGAGCUCUC
20	vun-miR159b	1	318	318	8.31288	0.0624681	1	UP	UUGGAUUGAAGAGAGCUC
21	vun-miR159b	17	1	0.0588235	-4.08746	0.117012	1	DOWN	CUUGGAGUGAAGGGAGCUCU
22	vun-miR159b-3p	1005	143	0.142289	-2.81311	0.429754	1	DOWN	UUUGGAUUGAAGGGAUCUCUU
23	vun-miR159c	5	104	20.8	4.37851	0.16757	1	UP	UUUGGAUUGAAGGGAGCUCC
24	vun-miR159c	570	2	0.00350877	-8.15482	0.0655555	1	DOWN	AUUGGAAUGAAGGGAGCUCU
25	vun-miR159c	170	2	0.0117647	-6.40939	0.0938952	1	DOWN	UUGGAUUGAAGGGAGCUCCA
26	vun-miR159c-5p	752	2	0.00265957	-8.55459	0.0581982	1	DOWN	UUGGAUCGAAGGGAGCUC
27	vun-miR159d	9	91	10.1111	3.33787	0.258615	1	UP	AGCUGCUCAGCUAUGGAUCCC
28	vun-miR159e	4	23	5.75	2.52356	0.294612	1	UP	UUUGGAUUGAAAGGAGCUCU
29	vun-miR159f	195	4	0.0205128	-5.60733	0.130139	1	DOWN	CUUGGAUUGAAGGGAGCUCUA
30	vun-miR159i-3p	81	25	0.308642	-1.69599	0.548213	1	DOWN	UUUGGAGUGAAGGGAGCUCU
31	vun-miR160a	3	11	3.66667	1.87447	0.406082	1	UP	CUGGCUCCCUGAAUGCCAU
32	vun-miR160a-3p	9	21	2.33333	1.22239	0.608582	1	UP	GCGUAUGAGGAGCCAAGCAUA
33	vun-miR160d	1835	4770	2.59946	1.37821	0.689258	1	UP	UGCCUGGCUCCCUGAAUGCCA
34	vun-miR162	31	13	0.419355	-1.25376	0.605651	1	DOWN	UCGAUAAACCUCUGCAUCCGG
35	vun-miR162a	132	45	0.340909	-1.55254	0.61578	1	DOWN	UCGAUAAACCUCUGCAUCCA
36	vun-miR162b	8	23	2.875	1.52356	0.522709	1	UP	UCGAUAAUCCUCUGCAUCCAG
37	vun-miR164b	1048	1	0.000954198	-10.0334	0.038986	1	DOWN	UGGAGAAGCAGGGCACGUGC
38	vun-miR164b-5p	12	4	0.333333	-1.58496	0.479789	1	DOWN	UGGAGAAGCAGGGCACGUGCA
39	vun-miR164e-5p	1	1761	1761	10.7822	0.0298856	1	UP	UGGAGAAGCAGGGCACGUGCAA
40	vun-miR164g-3p	28	9	0.321429	-1.63743	0.496678	1	DOWN	CACGUGCUCCCCUUCUCCA
41	vun-miR166a	134	3	0.0223881	-5.48113	0.118789	1	DOWN	UCGGACCAGGCUUCAUUCCCCC
42	vun-miR166a	338	219901	650.595	9.34562	0.0137227	1	UP	UCGGACCAGGCUUCAUUCCCC
43	vun-miR166a-5p	7	1	0.142857	-2.80735	0.260755	1	DOWN	GGACUGUUGUCUGGCUCGAGG
44	vun-miR166b	629	2	0.00317965	-8.29692	0.0629183	1	DOWN	UCGGACCAGGCUUCAUUCCCUU
45	vun-miR166b	2	508	254	7.98868	0.0686562	1	UP	UCGGACCAGGCUUCAUUCCCGU
46	vun-miR166d-5p	20	6	0.3	-1.73697	0.456891	1	DOWN	GAAUGUCGUCUGGUUCGAGA
47	vun-miR166e-3p	187662	98	0.000522215	-10.9031	0.00701635	1	DOWN	CUCGGACCAGGCUUCAUUCCC
48	vun-miR166e-5p	1198	460	0.383973	-1.38092	0.68796	1	DOWN	GGAAUGUUGGCUGGCUCGAGG
49	vun-miR166k-3p	149	3	0.0201342	-5.63421	0.117074	1	DOWN	UCGGACCAGGCUUCAAUCCC
50	vun-miR166q	203	49	0.241379	-2.05063	0.529617	1	DOWN	UCGGACCAGGCUUCAUUCCUU
51	vun-miR167b	32	7	0.21875	-2.19265	0.370061	1	DOWN	UGAAGCUGACAGCAUGAUCU
52	vun-miR167b-5p	33677	7862	0.233453	-2.0988	0.527829	1	DOWN	UAAAGCUGCCAGCAUGAUCUGG
53	vun-miR167d	5	25	5	2.32193	0.337084	1	UP	UGAAGCUGCCAGCAUGAUC
54	vun-miR167d	168	161318	960.226	9.90723	0.0124979	1	UP	UGAAGCUGCCAGCAUGAUCUGA
55	vun-miR167d-3p	122	313	2.56557	1.35928	0.683969	1	UP	GAUCAUGUGGCUGCUUCACC
56	vun-miR167f-3p	49	22	0.44898	-1.15528	0.654833	1	DOWN	AGAUCAUGUGGCAGUUUCACC
57	vun-miR167i	48544	516	0.0106295	-6.55578	0.0895262	1	DOWN	UGAAGCUGCCAGCAUGAUCUUA
58	vun-miR168	821	2975	3.62363	1.85744	0.594145	1	UP	GAUCCCGCCUUGCAUCAACUGAAU
59	vun-miR168b	2	16	8	3	0.205579	1	UP	UCGCUUGGUGCAGGUCGGG
60	vun-miR169ag	13	5	0.384615	-1.37851	0.541189	1	DOWN	AGCCAAGGGUGACUUGCC
61	vun-miR169b-3p	304	7	0.0230263	-5.44057	0.151495	1	DOWN	GGCAAGUGGUUCUUGGCUAC
62	vun-miR169b-5p	45	3586	79.6889	6.31631	0.12104	1	UP	CAGCCAAGGAUGACUUGCCGG
63	vun-miR169d	34	4	0.117647	-3.08746	0.225828	1	DOWN	UGAGCCAAGGAUGACUUGCCGGU
64	vun-miR169h	10	2	0.2	-2.32193	0.313493	1	DOWN	AGCCAAGGAUGGCUUGCCG
65	vun-miR169s	6917	1	0.000144571	-12.7559	0.0143539	1	DOWN	AAGCCAAGGAUGACUUGCCGG
66	vun-miR169u	470	8	0.0170213	-5.87652	0.136243	1	DOWN	CAGCCAAGGAUGACUUGCCGU
67	vun-miR170-3p	1	10	10	3.32193	0.182384	1	UP	UUGAGCCGUGUCAAUAUC
68	vun-miR170-5p	1387	391	0.281903	-1.82673	0.598841	1	DOWN	UAUUGGCCUGGUUCACUCAGA
69	vun-miR171c	780	342	0.438462	-1.18948	0.727973	1	DOWN	GAUUGAGCCGUGCCAAUAUU
70	vun-miR171c	3	198	66	6.04439	0.11173	1	UP	UAUUGGUCCGGUUCAAUGAGA
71	vun-miR171d	3	13	4.33333	2.11548	0.34793	1	UP	UGAUUGAGCCGUGCCAAUAUC
72	vun-miR171e	411	8	0.0194647	-5.68299	0.144172	1	DOWN	GAUAUUGGUCCGGUUCAAUAA
73	vun-miR171g	5	12	2.4	1.26303	0.578068	1	UP	UUGAGCCGCGCCAAUAUCU
74	vun-miR171k-3p	42	15	0.357143	-1.48543	0.551821	1	DOWN	UUGAGCCGCGCCAAUAUCACU
75	vun-miR171l	9	1	0.111111	-3.16993	0.201235	1	DOWN	CGAUGUUGGUGAGGUUCAAUC
76	vun-miR171m	4534	9438	2.08161	1.0577	0.755268	1	UP	UUGAGCCGCGUCAAUAUCUCA
77	vun-miR171p	30	82	2.73333	1.45066	0.610369	1	UP	UUGAGCCGCGUCAAUAUCUUA
78	vun-miR172a	3	583	194.333	7.60239	0.0771854	1	UP	AGAAUCUUGAUGAUGCUGCAU
79	vun-miR172d	667	10	0.0149925	-6.05961	0.130756	1	DOWN	UGAGAAUCUUGAUGAUGCUGCAU
80	vun-miR172i-5p	3547	997	0.281083	-1.83093	0.599238	1	DOWN	GCAGCAGCAUCAAGAUUCACA
81	vun-miR2111	471	31	0.0658174	-3.92539	0.280468	1	DOWN	UAAUCUGUAUCCUGAGGUUU
82	vun-miR2111-5p	1085	1	0.000921659	-10.0835	0.0383268	1	DOWN	UAAUCUGCAUCCUGAGGU
83	vun-miR2650	94	364	3.87234	1.95321	0.564561	1	UP	UUAAAUAUGUUUUUAGUCC
84	vun-miR2655b	7	34	4.85714	2.28011	0.353996	1	UP	CGUUUUUGUCCCUUAACUUU
85	vun-miR2916	8	2	0.25	-2	0.388754	1	DOWN	UGGGGGCUCGAAGACGAUCA
86	vun-miR319a-5p	6	18	3	1.58496	0.492169	1	UP	GAGCUUCCUUCAGUCCACUC
87	vun-miR319c-5p	87	41	0.471264	-1.08539	0.709732	1	DOWN	GAGCUUCCUUCAGCCCAC
88	vun-miR319d	8066	1	0.000123977	-12.9776	0.0131026	1	DOWN	UGGACUGAAGGGGAGCUCCUUC
89	vun-miR319d-3p	5516	264	0.0478608	-4.38501	0.246528	1	DOWN	CUUGGACUGAAGGGAGCUCCC
90	vun-miR319f	42	299	7.11905	2.83168	0.408041	1	UP	UUGGACUGAAGGGGCCUCUU
91	vun-miR319g	12397	7	0.000564653	-10.7903	0.0224405	1	DOWN	UUGGACUGAAGGGAGCUCCUUC
92	vun-miR319i	52	6	0.115385	-3.11548	0.239013	1	DOWN	UUGGACUGAAGGGGAGCUCCUUC
93	vun-miR3711	2	66	33	5.04439	0.0986082	1	UP	AGGCCCUCCUUCUAGCGCCA
94	vun-miR390a-3p	2467	30	0.0121605	-6.36165	0.118953	1	DOWN	CGCUAUCUAUCCUGAGUUUCA
95	vun-miR390b	367	1537	4.18801	2.06627	0.554339	1	UP	AAGCUCAGGAGGGAUAGCGCC
96	vun-miR393	257	2	0.0077821	-7.00562	0.0863743	1	DOWN	UCCAAAGGGAUCGCAUUGAUCU
97	vun-miR393-3p	19	53	2.78947	1.47999	0.568265	1	UP	AUCAUGCGAUCUCUUAGGAA
98	vun-miR393-5p	40	11	0.275	-1.8625	0.452019	1	DOWN	UUCCAAAGGGAUCGCAUUGAU
99	vun-miR393a-5p	1	723	723	9.49785	0.0462825	1	UP	UCCAAAGGGAUCGCAUUGAUCC
100	vun-miR393c-3p	39	5	0.128205	-2.96347	0.245061	1	DOWN	AUCAUGCUAUCCCUUUGGAUU
101	vun-miR395c-5p	25	179	7.16	2.83996	0.385573	1	UP	UUCCCCUUAACGCUUCAUUG
102	vun-miR395c-5p	40	1	0.025	-5.32193	0.078806	1	DOWN	GUUCCUCUGAGCACUUCA
103	vun-miR395d	356	2317	6.50843	2.70231	0.448501	1	UP	UGAAGUGUUUGGGGGAACUUU
104	vun-miR395g	24	6	0.25	-2	0.403144	1	DOWN	UUGAAGUGUUUGGGGGAACUC
105	vun-miR395i	8	1777	222.125	7.79523	0.0712192	1	UP	AUGAAGUGUUUGGGGGAACUC
106	vun-miR395o	25	172	6.88	2.78241	0.392227	1	UP	UGAAGUGUUUGGAGGAACUC
107	vun-miR396	97542	334	0.00342417	-8.19003	0.0355603	1	DOWN	UUCCACAGCUUUCUUGAACUU
108	vun-miR396-3p	464	7129	15.3642	3.9415	0.28893	1	UP	AAGCUCAAGAAAGCUGUGGGA
109	vun-miR396a	49	180135	3676.22	11.844	0.00457168	1	UP	CACAGCUUUCUUGAACUUUCU
110	vun-miR396a	74	1	0.0135135	-6.20945	0.066864	1	DOWN	UUCCACAGCUUUCUUGAACA
111	vun-miR396a	103	35	0.339806	-1.55722	0.600069	1	DOWN	UCCACAGCUUUCUUGAACUA
112	vun-miR396a-3p	173	841	4.86127	2.28133	0.514627	1	UP	GUUCAAUAAAGCUGUGGGAAG
113	vun-miR396g-3p	8	62	7.75	2.9542	0.274545	1	UP	UCUUCCACAGCUUUCUUGAAC
114	vun-miR396j	50	1	0.02	-5.64386	0.0713167	1	DOWN	UCAAGACAGCUGUGGAAAA
115	vun-miR396k-3p	7197	12	0.00166736	-9.22822	0.041132	1	DOWN	GCUCAGGAAAGCUGUGGGAGA
116	vun-miR397a	1236	26	0.0210356	-5.57102	0.158629	1	DOWN	UCAUUGAGUGCAGCGUUGAUG
117	vun-miR398b-3p	10	34	3.4	1.76553	0.468453	1	UP	UUGUGUUCUCAGGUCACCCCU
118	vun-miR398c	948	45	0.0474684	-4.39689	0.243104	1	DOWN	UGUGUUCUCAGGUCGCCCCUG
119	vun-miR399b-3p	362	1262	3.48619	1.80165	0.603483	1	UP	UGCCAAAGGAGAGUUGUCCUG
120	vun-miR399c-3p	763	16	0.0209699	-5.57554	0.156737	1	DOWN	UGCCAAAGGAGAGUUGCCCUG
121	vun-miR399e-5p	1	160	160	7.32193	0.0704294	1	UP	GGGCUUCUCUUUGUUGGCAGG
122	vun-miR399l	167	704	4.21557	2.07573	0.550057	1	UP	GCCAAAGAAGAGUUGCCCU
123	vun-miR403-5p	451	2	0.00443459	-7.81698	0.0718657	1	DOWN	GUUUGUGCGUGAAUCUAAC
124	vun-miR403a	98	7081	72.2551	6.17503	0.126651	1	UP	UUAGAUUCACGCACAAACUUG
125	vun-miR408	7	96	13.7143	3.77761	0.213668	1	UP	UGCACUGCCUCUUCCCUGG
126	vun-miR408	5	58	11.6	3.53605	0.196604	1	UP	AUGCACUGCCUCUUCCCUGGC
127	vun-miR408a-5p	1	12	12	3.58496	0.155248	1	UP	CAGGGGAACAGGCAGAGCAUG
128	vun-miR4376-5p	2	39	19.5	4.2854	0.122117	1	UP	UACGCAGGAGAGAUGACGCUG
129	vun-miR4415a-3p	20	2	0.1	-3.32193	0.178179	1	DOWN	UUGAUUCUCAUCACAACAUG
130	vun-miR477b	30	1	0.0333333	-4.90689	0.0930134	1	DOWN	CUCUCCCUCAAGGGCUUCUC
131	vun-miR479a	264	95	0.359848	-1.47454	0.655923	1	DOWN	CGUGAUAUUGGUUUGGCUCAUC
132	vun-miR482a-3p	1484	4	0.00269542	-8.53528	0.0560546	1	DOWN	UCUUCCCAAUUCCGCCCAUUCCUA
133	vun-miR5139	8	2	0.25	-2	0.388754	1	DOWN	AAACCUGGCUCUGAUACCA
134	vun-miR5141	17	1	0.0588235	-4.08746	0.117012	1	DOWN	UUAUCUGUCAGUCGCGUCGGGU
135	vun-miR5225a	18	116	6.44444	2.68806	0.378266	1	UP	GUCGCAGGAGAGAUGACA
136	vun-miR5255	34	80	2.35294	1.23447	0.665075	1	UP	UGACUUGAUUGAGGACAUGGG
137	vun-miR5538	23	4	0.173913	-2.52356	0.294612	1	DOWN	ACUGAACUCAAUCACUUGCUGC
138	vun-miR5770a	2	3978	1989	10.9578	0.024872	1	UP	UUAGGACUAUGGUUUGGACGA
139	vun-miR6483	52	2	0.0384615	-4.70044	0.105656	1	DOWN	UAUUGUAGAAAUUUUCAGGAUC
140	vun-miR8175	163	47	0.288344	-1.79414	0.572921	1	DOWN	GAUCCCCGGCAACGGCGCCA
141	vun-miR828a	13	2	0.153846	-2.70044	0.245314	1	DOWN	UCUUGCUCAAAUGAGUAUUCCA
142	vun-miR8739	48	1	0.0208333	-5.58496	0.0723548	1	DOWN	CUAAAUAGUGACACGUGGCAU
143	vun-miR9725	12	1	0.0833333	-3.58496	0.155248	1	DOWN	UUAAUUUUUUUGGAUCAG
144	vun-miR9726	279	22	0.078853	-3.66469	0.295067	1	DOWN	UAUAGGCAUCAUUUUUUUCUU

## Sheet: CR vs DR
Table S5b. Differentially expressed drought induced miRNAs (DE) in root (control:CR and drought stressed: DR sRNA libraries) of cowpea.
Sl. No.	miRNA ID	CR Expression	DR Expression	FoldChange	log2FoldChange	P Value	Adjusted P Value	Regulation	Sequence
1	vun-miR160	556.237	113.948	0.204855	-2.28733	0.455663	1	DOWN	UGCCUGGCUCCCUGUAUGCCA
2	vun-miR393-5p	73.209	10.5998	0.144788	-2.78799	0.323299	1	DOWN	UUCCAAAGGGAUCGCAUUGAU
3	vun-miR157c-3p	56.6049	1.32497	0.0234074	-5.41689	0.0997025	1	DOWN	GCUCUCUAUACUUCUGUCA
4	vun-miR159b-3p	49.0576	9.27482	0.18906	-2.40309	0.379329	1	DOWN	UUUGGAUUGAAGGGAUCUCUU
5	vun-miR164b-5p	1209.84	2.64995	0.00219034	-8.83463	0.0296439	1	DOWN	UGGAGAAGCAGGGCACGUGCA
6	vun-miR166a-5p	8.30205	3.97492	0.478788	-1.06254	0.691081	1	DOWN	GGACUGUUGUCUGGCUCGAGG
7	vun-miR167d	103.398	5.2999	0.0512571	-4.2861	0.161206	1	DOWN	UGAAGCUGCCAGCAUGAUCUGG
8	vun-miR2111a-5p	38.4913	18.5496	0.481917	-1.05314	0.699863	1	DOWN	UAAUCUGCAUCCUGAGGUUUA
9	vun-miR396a-5p	30200.6	25.1745	0.000833576	-10.2284	0.0481868	1	DOWN	UUCCACAGCUUUCUUGAACUG
10	vun-miR166e-3p	10324	1.32497	0.000128339	-12.9277	0.0146804	1	DOWN	CUCGGACCAGGCUUCAUUCCC
11	vun-miR7782-5p	3.77366	1.32497	0.351111	-1.51	0.71618	1	DOWN	AACUUGCUCUGAUACCAUG
12	vun-miR167b	21.1325	2.64995	0.125397	-2.99543	0.242917	1	DOWN	UGAAGCUGCCAGCAUGAUCUA
13	vun-miR167d	3.01893	1.32497	0.438889	-1.18807	0.864113	1	DOWN	UGAAGCUGCCAGCAUGAUC
14	vun-miR167d	6157.1	18.5496	0.00301272	-8.37472	0.0523898	1	DOWN	UGAAGCUGCCAGCAUGAUCUGA
15	vun-miR156c	6.03786	2.64995	0.438889	-1.18807	0.692608	1	DOWN	UGUCAGAAGAGAGUGAGCAC
16	vun-miR159f-3p	34.7177	5.2999	0.152657	-2.71163	0.313825	1	DOWN	AUUGGAGUGAAGGGAGCUCC
17	vun-miR160a-3p	18.1136	5.2999	0.292593	-1.77303	0.467095	1	DOWN	GCGUAUGAGGAGCCAAGCAUA
18	vun-miR166u	15.0946	2.64995	0.175556	-2.51	0.304522	1	DOWN	UCUCGGACCAGGCUUCAUUC
19	vun-miR168b	3.01893	1.32497	0.438889	-1.18807	0.864113	1	DOWN	UCGCUUGGUGCAGGUCGGG
20	vun-miR171m	2086.08	63.5987	0.0304872	-5.03565	0.158956	1	DOWN	UUGAGCCGCGUCAAUAUCUCA
21	vun-miR171q	27.1703	1.32497	0.0487654	-4.358	0.136262	1	DOWN	UUGAGCCGUGCCAAGAUCACA
22	vun-miR2111d	12.8304	3.97492	0.309804	-1.69057	0.480385	1	DOWN	GUCCUUGGGAUGCAGAUUAC
23	vun-miR319d	5.28312	1.32497	0.250794	-1.99543	0.519643	1	DOWN	UGGACUGAAGGGGAGCUCCUUC
24	vun-miR319g	663.409	17.2247	0.0259638	-5.26735	0.118124	1	DOWN	UUGGACUGAAGGGAGCUCCUUC
25	vun-miR395d	3.77366	1.32497	0.351111	-1.51	0.71618	1	DOWN	UGAAGUGUUUGGGGGAACUUU
26	vun-miR399d	6.79259	1.32497	0.195062	-2.358	0.400507	1	DOWN	UGCCAAAGGAGAUUUGCCCAG
27	vun-miR5041-3p	17.3588	1.32497	0.0763285	-3.71163	0.166757	1	DOWN	GUUGAGCAAGUUGAAGAUG
28	vun-miR5374-3p	7.54732	1.32497	0.175556	-2.51	0.358245	1	DOWN	UUCAAAUGUCAGAUUAUAAAA
29	vun-miR5374-5p	280.006	1.32497	0.00473196	-7.72335	0.0416007	1	DOWN	UUAUAAUCUGACAUCUGGAAU
30	vun-miR8739	7.54732	1.32497	0.175556	-2.51	0.358245	1	DOWN	CUAAAUAGUGACACGUGGCAU
31	vun-miR482a-5p	14.3399	1.32497	0.0923977	-3.436	0.191895	1	DOWN	GGAAUGGGCUGUUUGGGAAG
32	vun-miR2650	12.8304	3.97492	0.309804	-1.69057	0.480385	1	DOWN	UUAAAUAUGUUUUUAGUCC
33	vun-miR319d-5p	22.642	9.27482	0.40963	-1.28761	0.617132	1	DOWN	GAGCUUUCUUCAGUCCACUC
34	vun-miR5255	3.01893	1.32497	0.438889	-1.18807	0.864113	1	DOWN	UGACUUGAUUGAGGACAUGGG
35	vun-miR166e-3p	3.01893	1.32497	0.438889	-1.18807	0.864113	1	DOWN	UCGAACCAGGCUUCAUUCCCC
36	vun-miR3711	94.3415	1.32497	0.0140444	-6.15386	0.0762927	1	DOWN	AGGCCCUCCUUCUAGCGCCA
37	vun-miR6288a	5.28312	1.32497	0.250794	-1.99543	0.519643	1	DOWN	GAAAAUGACAAGUGGCUAG
38	vun-miR319d-3p	59.6238	1.32497	0.0222222	-5.49185	0.0969046	1	DOWN	CUUGGACUGAAGGGAGCUCCC
39	vun-miR167f-3p	13.5852	2.64995	0.195062	-2.358	0.331696	1	DOWN	AGAUCAUGUGGCAGUUUCACC
40	vun-miR6478	56109	1.32497	2.36143e-05	-15.37	0.0177586	1	DOWN	CCGACCUUAGCUCAGUUGGU
41	vun-miR482-5p	7003.16	14.5747	0.00208116	-8.90839	0.0445231	1	DOWN	GGAAUGGGCUGAUUGGGAAGCA
42	vun-miR171c	3.01893	1.32497	0.438889	-1.18807	0.864113	1	DOWN	UAUUGGUCCGGUUCAAUGAGA
43	vun-miR319c-5p	11.321	3.97492	0.351111	-1.51	0.532645	1	DOWN	GAGCUUCCUUCAGCCCAC
44	vun-miR166d-5p	38.4913	17.2247	0.447495	-1.16006	0.669224	1	DOWN	GAAUGUCGUCUGGUUCGAGA
45	vun-miR393-3p	12.0757	3.97492	0.329167	-1.60311	0.504893	1	DOWN	AUCAUGCGAUCUCUUAGGAA
46	vun-miR396a	25.6609	2.64995	0.103268	-3.27554	0.220083	1	DOWN	UCCACAGCUUUCUUGAACUA
47	vun-miR169b-3p	3.77366	1.32497	0.351111	-1.51	0.71618	1	DOWN	GGCAAGUGGUUCUUGGCUAC
48	vun-miR156b-3p	0.754732	2.64995	3.51111	1.81193	0.695378	1	UP	GCUCACGUCUCUUUCUGUCAGU
49	vun-miR169b-5p	2.2642	45.0491	19.8963	4.31443	0.130724	1	UP	CAGCCAAGGAUGACUUGCCGG
50	vun-miR171b-3p	0.754732	15.8997	21.0667	4.39689	0.0878147	1	UP	UUGAGCCGUGCCAAUAUCACG
51	vun-miR319b	7.54732	2139.83	283.522	8.14732	0.0413225	1	UP	UUGGACUGAAGGGAGCUCCCU
52	vun-miR171g	1.50946	5.2999	3.51111	1.81193	0.491068	1	UP	UUGAGCCGCGCCAAUAUCU
53	vun-miR397a	0.754732	153.697	203.644	7.66991	0.0371996	1	UP	UCAUUGAGUGCAGCGUUGAUG
54	vun-miR164e-5p	4.52839	1102.38	243.437	7.9274	0.0379725	1	UP	UGGAGAAGCAGGGCACGUGCAA
55	vun-miR156b	7.54732	51.674	6.84667	2.7754	0.301262	1	UP	UGACAGAAGAGAGUGAGCAU
56	vun-miR166a	0.754732	82.1484	108.844	6.76612	0.0498571	1	UP	UCGGACCAGGCUUCAUUCCCCC
57	vun-miR166b	2.2642	9765.06	4312.81	12.0744	0.0162282	1	UP	UCGGACCAGGCUUCAUUCCCGU
58	vun-miR393	5.28312	52.999	10.0317	3.3265	0.225222	1	UP	UCCAAAGGGAUCGCAUUGAUCU
59	vun-miR159d	3.01893	6.62487	2.19444	1.13386	0.656273	1	UP	AGCUGCUCAGCUAUGGAUCCC
60	vun-miR166k	6.79259	2783.77	409.825	8.67886	0.036049	1	UP	UCUCGGACCAGGCGUCAUUCC
61	vun-miR171p	64.1522	1699.94	26.4986	4.72784	0.173447	1	UP	UUGAGCCGCGUCAAUAUCUUA
62	vun-miR172i-5p	0.754732	74.1985	98.3111	6.61928	0.0522012	1	UP	GCAGCAGCAUCAAGAUUCACA
63	vun-miR2119	0.754732	41.0742	54.4222	5.76612	0.0674948	1	UP	UCAAAGGGAGUUGUAGGGGAA
64	vun-miR319p	41.5103	153.697	3.70263	1.88855	0.503143	1	UP	UUUUGGACUGAAGGGAGCUCC
65	vun-miR396e	130.569	24582.2	188.271	7.55666	0.104862	1	UP	UUCCACAGCUUUCUUGAACUGU
66	vun-miR396k-3p	0.754732	2.64995	3.51111	1.81193	0.695378	1	UP	GCUCAGGAAAGCUGUGGGAGA
67	vun-miR398c	10.5662	42.3992	4.0127	2.00457	0.441157	1	UP	UGUGUUCUCAGGUCGCCCCUG
68	vun-miR403a	0.754732	253.07	335.311	8.38936	0.0281578	1	UP	UUAGAUUCACGCACAAACUUG
69	vun-miR482a-3p	9.05678	446.516	49.3019	5.62357	0.0911649	1	UP	UCUUCCCAAUUCCGCCCAUUCCUA
70	vun-miR5368	49.8123	123.223	2.47374	1.30669	0.637121	1	UP	GGACAGUCUCAGGUAGACA
71	vun-miR9726	1.50946	5.2999	3.51111	1.81193	0.491068	1	UP	UAUAGGCAUCAUUUUUUUCUU
72	vun-miR167i	95.851	5715.94	59.6336	5.89805	0.1336	1	UP	UGAAGCUGCCAGCAUGAUCUUA
73	vun-miR396a	0.754732	6.62487	8.77778	3.13386	0.228588	1	UP	UUCCACAGCUUUCUUGAACA
74	vun-miR160g	2.2642	420.017	185.504	7.5353	0.0379689	1	UP	UGCCUGGCUCCCUGUAUGCCA
75	vun-miR156g-5p	1.50946	3.97492	2.63333	1.39689	0.667961	1	UP	UUGACAGAAGAUAGAGGGCAC
76	vun-miR156i-3p	0.754732	52.999	70.2222	6.13386	0.0612216	1	UP	UGCUCACUUCUCUUUCUGUCA
77	vun-miR166e-5p	3.01893	14.5747	4.82778	2.27136	0.309303	1	UP	GGAAUGUUGGCUGGCUCGAGG
78	vun-miR2655b	0.754732	10.5998	14.0444	3.81193	0.126715	1	UP	CGUUUUUGUCCCUUAACUUU
79	vun-miR395o	0.754732	2.64995	3.51111	1.81193	0.695378	1	UP	UGAAGUGUUUGGAGGAACUC
80	vun-miR5083	1.50946	13.2497	8.77778	3.13386	0.17604	1	UP	AGACUACAAUUAUCUGAUC
81	vun-miR2916	14.3399	49.024	3.41871	1.77345	0.498937	1	UP	UGGGGGCUCGAAGACGAUCA
82	vun-miR894	40.7555	1615.14	39.63	5.30852	0.132702	1	UP	CGUUUCACGUCAGGUUCACC
83	vun-miR159b	0.754732	5.2999	7.02222	2.81193	0.307128	1	UP	UUGGAUUGAAGAGAGCUC
84	vun-miR408	0.754732	2.64995	3.51111	1.81193	0.695378	1	UP	AUGCACUGCCUCUUCCCUGGC
85	vun-miR5139	126.04	271.62	2.15502	1.1077	0.697118	1	UP	AAACCUGGCUCUGAUACCA
86	vun-miR408	0.754732	6.62487	8.77778	3.13386	0.228588	1	UP	UGCACUGCCUCUUCCCUGGCU
87	vun-miR159e	9.81151	22.5246	2.29573	1.19895	0.624621	1	UP	UUUGGAUUGAAAGGAGCUCU
88	vun-miR156h-3p	9.81151	223.921	22.8222	4.51237	0.14566	1	UP	GCUCACUACUCUUUCUGUCA
89	vun-miR159i-3p	6.03786	19.8746	3.29167	1.71882	0.462042	1	UP	UUUGGAGUGAAGGGAGCUCU

## Sheet: CL vs CR
Table S5c. Differentially expressed drought induced miRNAs (DE) in control leaf (CL) and root (CR) sRNA libraries of cowpea.
Sl. No.	miRNA ID	CL Expression	CR Expression	FoldChange	log2FoldChange	P Value	Adjusted P Value	Regulation	Sequence
1	vun-miR160	2945.64	1276.52	0.433359	-1.20636	0.912713	1	DOWN	UGCCUGGCUCCCUGUAUGCCA
2	vun-miR168	474.005	27.7128	0.0584653	-4.09628	0.599134	1	DOWN	GAUCCCGCCUUGCAUCAACUGAAU
3	vun-miR157d-3p	751.133	83.1384	0.110684	-3.17548	0.69769	1	DOWN	GCUCUCUAGGCUUCUGUCAUC
4	vun-miR167b-3p	28.8675	8.66025	0.3	-1.73697	0.74091	1	DOWN	GGUCAUGCUGUGACAGCCUCACU
5	vun-miR319b-5p	0.57735	31.1769	54	5.75489	0.218122	1	UP	AGAGCUUUCUUCGGUCCACU
6	vun-miR395c-5p	14.4338	1.73205	0.12	-3.05889	0.520321	1	DOWN	UUCCCCUUAACGCUUCAUUG
7	vun-miR396-3p	267.891	718.801	2.68319	1.42395	0.829092	1	UP	AAGCUCAAGAAAGCUGUGGGA
8	vun-miR159	362.576	32.909	0.0907643	-3.46173	0.654806	1	DOWN	UUUGGACUGAAGGGAGCUCUA
9	vun-miR156d-3p	16.7432	3.4641	0.206897	-2.27302	0.63258	1	DOWN	GCUCACUCCUCUUUCUGUCA
10	vun-miR393-5p	23.094	168.009	7.275	2.86295	0.634942	1	UP	UUCCAAAGGGAUCGCAUUGAU
11	vun-miR157c-3p	5576.63	129.904	0.0232943	-5.42388	0.495988	1	DOWN	GCUCUCUAUACUUCUGUCA
12	vun-miR159a	568130	66444.9	0.116954	-3.09599	0.543992	1	DOWN	UUUGGAUUGAAGGGAGCUCUA
13	vun-miR159b-3p	580.237	112.583	0.19403	-2.36565	0.78305	1	DOWN	UUUGGAUUGAAGGGAUCUCUU
14	vun-miR159c	2.88675	13.8564	4.8	2.26303	0.539463	1	UP	UUUGGAUUGAAGGGAGCUCC
15	vun-miR162b-3p	6569.67	3254.52	0.495386	-1.01337	0.930693	1	DOWN	UCGAUAAACCUCUGCAUCCAG
16	vun-miR164b-5p	6.9282	2776.48	400.75	8.64656	0.282265	1	UP	UGGAGAAGCAGGGCACGUGCA
17	vun-miR165b	161.658	22.5167	0.139286	-2.84388	0.681318	1	DOWN	UCGGACCAGGCUUCAUACCCC
18	vun-miR166a-5p	4.04145	19.0526	4.71429	2.23704	0.555823	1	UP	GGACUGUUGUCUGGCUCGAGG
19	vun-miR167d	101.614	237.291	2.33523	1.22356	0.838274	1	UP	UGAAGCUGCCAGCAUGAUCUGG
20	vun-miR168a-3p	1.73205	547.328	316	8.30378	0.289695	1	UP	CCCGCCUUGCAUCAACUGAAU
21	vun-miR168b-5p	12722.5	3264.92	0.256626	-1.96226	0.823483	1	DOWN	UCGCUUGGUGCAGGUCGGGAA
22	vun-miR169b-5p	25.9808	5.19615	0.2	-2.32193	0.633309	1	DOWN	CAGCCAAGGAUGACUUGCCGG
23	vun-miR170-3p	0.57735	1.73205	3	1.58496	0.95336	1	UP	UUGAGCCGUGUCAAUAUC
24	vun-miR170-5p	800.785	3.4641	0.00432588	-7.85279	0.342141	1	DOWN	UAUUGGCCUGGUUCACUCAGA
25	vun-miR171b-3p	1200.89	1.73205	0.00144231	-9.43741	0.28087	1	DOWN	UUGAGCCGUGCCAAUAUCACG
26	vun-miR172a	1.73205	51.9615	30	4.90689	0.309981	1	UP	AGAAUCUUGAUGAUGCUGCAU
27	vun-miR2111a-5p	371.814	88.3346	0.237578	-2.07353	0.810805	1	DOWN	UAAUCUGCAUCCUGAGGUUUA
28	vun-miR390a-3p	1424.32	126.44	0.0887718	-3.49375	0.669989	1	DOWN	CGCUAUCUAUCCUGAGUUUCA
29	vun-miR393a-5p	0.57735	607.95	1053	10.0403	0.232883	1	UP	UCCAAAGGGAUCGCAUUGAUCC
30	vun-miR394b-5p	967.062	110.851	0.114627	-3.12498	0.705114	1	DOWN	UUGGCAUUCUGUCCACCUCC
31	vun-miR396a-3p	99.8816	16580.9	166.006	7.37509	0.322256	1	UP	GUUCAAUAAAGCUGUGGGAAG
32	vun-miR396a-5p	64.0859	69308	1081.49	10.0788	0.149545	1	UP	UUCCACAGCUUUCUUGAACUG
33	vun-miR399c-3p	440.518	3.4641	0.0078637	-6.99058	0.381888	1	DOWN	UGCCAAAGGAGAGUUGCCCUG
34	vun-miR5653	11.547	1.73205	0.15	-2.73697	0.561291	1	DOWN	ACUCAACUCAACUUAACCCA
35	vun-miR8175	94.1081	478.046	5.07975	2.34476	0.735147	1	UP	GAUCCCCGGCAACGGCGCCA
36	vun-miR2111	271.932	10.3923	0.0382166	-4.70966	0.516997	1	DOWN	UAAUCUGUAUCCUGAGGUUU
37	vun-miR8610.1	774.804	1842.9	2.37854	1.25008	0.84887	1	UP	UUUUCUGAACAAAUCGAAGAA
38	vun-miR156h-3p	20.2073	3.4641	0.171429	-2.54432	0.589521	1	DOWN	GCUCACUUCUCUUCCUGUCA
39	vun-miR162	17.8979	3.4641	0.193548	-2.36923	0.616593	1	DOWN	UCGAUAAACCUCUGCAUCCGG
40	vun-miR166e-3p	108347	23692.7	0.218675	-2.19314	0.744589	1	DOWN	CUCGGACCAGGCUUCAUUCCC
41	vun-miR7782-5p	34.641	8.66025	0.25	-2	0.701978	1	DOWN	AACUUGCUCUGAUACCAUG
42	vun-miR156	4941.54	1631.59	0.330179	-1.59868	0.870579	1	DOWN	UUGACAGAAGAUAGAGAGCAC
43	vun-miR156a	7196.09	3232.01	0.449134	-1.15478	0.915527	1	DOWN	UGACAGAAGAGAGUGAGCACA
44	vun-miR167b	131.636	48.4974	0.368421	-1.44057	0.858603	1	DOWN	UGAAGCUGCCAGCAUGAUCUA
45	vun-miR167d	2.88675	6.9282	2.4	1.26303	0.736549	1	UP	UGAAGCUGCCAGCAUGAUC
46	vun-miR168b	7.50555	1.73205	0.230769	-2.11548	0.6755	1	DOWN	UCGCUUGGUGCAGGUCGAGAA
47	vun-miR397a	713.605	1.73205	0.00242718	-8.6865	0.311346	1	DOWN	UCAUUGAGUGCAGCGUUGAUG
48	vun-miR164e-5p	0.57735	10.3923	18	4.16993	0.272407	1	UP	UGGAGAAGCAGGGCACGUGCAA
49	vun-miR156b	150.111	17.3205	0.115385	-3.11548	0.642461	1	DOWN	UGACAGAAGAGAGUGAGCAU
50	vun-miR156j	22.5167	65.8179	2.92308	1.54749	0.747631	1	UP	UUGACAGAAGAGAGUGAGCAC
51	vun-miR160d	1059.44	77.9423	0.0735695	-3.76475	0.640546	1	DOWN	UGCCUGGCUCCCUGAAUGCCA
52	vun-miR167d	96.9948	14130.1	145.679	7.18664	0.337878	1	UP	UGAAGCUGCCAGCAUGAUCUGA
53	vun-miR171d	1.73205	34.641	20	4.32193	0.324412	1	UP	UGAUUGAGCCGUGCCAAUAUC
54	vun-miR166a	77.3649	1.73205	0.0223881	-5.48113	0.366774	1	DOWN	UCGGACCAGGCUUCAUUCCCCC
55	vun-miR166b	1.1547	5.19615	4.5	2.16993	0.569981	1	UP	UCGGACCAGGCUUCAUUCCCGU
56	vun-miR393	148.379	12.1244	0.0817121	-3.61331	0.58256	1	DOWN	UCCAAAGGGAUCGCAUUGAUCU
57	vun-miR1507a	305387	68450.6	0.224144	-2.1575	0.710406	1	DOWN	UCUCAUUCCAUACAUCGUCUGA
58	vun-miR1511	1308.28	204.382	0.156222	-2.67833	0.754559	1	DOWN	AACCAGGCUCUGAUACCAUG
59	vun-miR1514a-3p	15.5885	1.73205	0.111111	-3.16993	0.507108	1	DOWN	AUGCCUAUUUUAAAAUGAAAA
60	vun-miR1514a-5p	11827	2374.64	0.200781	-2.3163	0.785835	1	DOWN	UUCAUUUUUAAAAUAGGCAUU
61	vun-miR1515a	11101.9	5074.91	0.457122	-1.12935	0.915474	1	DOWN	UCAUUUUGCGUGCAAUGAUCUG
62	vun-miR156f	1360.81	24.2487	0.0178193	-5.81042	0.46527	1	DOWN	UUGACAGAAGAGAGAGAGCACA
63	vun-miR159a-5p	2208.36	968.216	0.438431	-1.18958	0.914523	1	DOWN	GAGCUCCUUGAAGUCCAAUUG
64	vun-miR160a-3p	5.19615	41.5692	8	3	0.494768	1	UP	GCGUAUGAGGAGCCAAGCAUA
65	vun-miR162a	76.2102	8.66025	0.113636	-3.1375	0.588669	1	DOWN	UCGAUAAACCUCUGCAUCCA
66	vun-miR164b	605.063	5.19615	0.00858779	-6.8635	0.392339	1	DOWN	UGGAGAAGCAGGGCACGUGC
67	vun-miR166c-5p	678.964	3083.05	4.54082	2.18295	0.760557	1	UP	GGAAUGUUGUCUGGCUCGAGG
68	vun-miR166h-5p	34.641	337.75	9.75	3.2854	0.630684	1	UP	GGAAUGUUGUUUGGCUCGAGG
69	vun-miR166k	4.04145	15.5885	3.85714	1.94753	0.600605	1	UP	UCUCGGACCAGGCGUCAUUCC
70	vun-miR166u	4.04145	34.641	8.57143	3.09954	0.465099	1	UP	UCUCGGACCAGGCUUCAUUC
71	vun-miR168b	1.1547	6.9282	6	2.58496	0.469462	1	UP	UCGCUUGGUGCAGGUCGGG
72	vun-miR169d	19.6299	119.512	6.08824	2.60602	0.642405	1	UP	UGAGCCAAGGAUGACUUGCCGGU
73	vun-miR169i-5p	118.934	13.8564	0.116505	-3.10154	0.627822	1	DOWN	UGAGCAGGGAUGGCUUGCCGG
74	vun-miR169n-5p	1584.83	29.4449	0.0185792	-5.75017	0.470767	1	DOWN	CAGCCAAGGGUGAUUUGCCGG
75	vun-miR171b-3p	31.1769	284.056	9.11111	3.18763	0.632469	1	UP	CGAGCCGAAUCAAUAUCACUC
76	vun-miR171k-3p	24.2487	136.832	5.64286	2.49643	0.664936	1	UP	UUGAGCCGCGCCAAUAUCACU
77	vun-miR171l	5.19615	36.3731	7	2.80735	0.510362	1	UP	CGAUGUUGGUGAGGUUCAAUC
78	vun-miR171p	17.3205	147.224	8.5	3.08746	0.599605	1	UP	UUGAGCCGCGUCAAUAUCUUA
79	vun-miR171q	1.1547	62.3538	54	5.75489	0.269613	1	UP	UUGAGCCGUGCCAAGAUCACA
80	vun-miR172c	20.7846	5.19615	0.25	-2	0.681354	1	DOWN	GGAAUCUUGAUGAUGCUGCAG
81	vun-miR172i-5p	2047.86	1.73205	0.000845785	-10.2074	0.251838	1	DOWN	GCAGCAGCAUCAAGAUUCACA
82	vun-miR2111d	66.3953	29.4449	0.443478	-1.17306	0.87541	1	DOWN	GUCCUUGGGAUGCAGAUUAC
83	vun-miR2119	62.9312	1.73205	0.0275229	-5.18322	0.370428	1	DOWN	UCAAAGGGAGUUGUAGGGGAA
84	vun-miR319d	4656.91	12.1244	0.00260352	-8.58532	0.300851	1	DOWN	UGGACUGAAGGGGAGCUCCUUC
85	vun-miR319f	24.2487	618.342	25.5	4.67243	0.519766	1	UP	UUGGACUGAAGGGGCCUCUU
86	vun-miR319g	7157.41	1522.47	0.212713	-2.23302	0.800721	1	DOWN	UUGGACUGAAGGGAGCUCCUUC
87	vun-miR319i	30.0222	1030.57	34.3269	5.10127	0.491047	1	UP	UUGGACUGAAGGGGAGCUCCUUC
88	vun-miR393c-3p	22.5167	6.9282	0.307692	-1.70044	0.739069	1	DOWN	AUCAUGCUAUCCCUUUGGAUU
89	vun-miR395d	205.537	8.66025	0.0421348	-4.56884	0.50931	1	DOWN	UGAAGUGUUUGGGGGAACUUU
90	vun-miR396j	28.8675	10.3923	0.36	-1.47393	0.789808	1	DOWN	UCAAGACAGCUGUGGAAAA
91	vun-miR396k-3p	4155.19	1.73205	0.00041684	-11.2282	0.214232	1	DOWN	GCUCAGGAAAGCUGUGGGAGA
92	vun-miR398c	547.328	24.2487	0.0443038	-4.49643	0.564655	1	DOWN	UGUGUUCUCAGGUCGCCCCUG
93	vun-miR399d	256.921	15.5885	0.0606742	-4.04277	0.576535	1	DOWN	UGCCAAAGGAGAUUUGCCCAG
94	vun-miR399i	1049.62	3.4641	0.00330033	-8.24317	0.323966	1	DOWN	UGCCAAAGGAGAAUUGCCCUG
95	vun-miR403a	56.5803	1.73205	0.0306122	-5.02975	0.372451	1	DOWN	UUAGAUUCACGCACAAACUUG
96	vun-miR408a-5p	0.57735	3.4641	6	2.58496	0.574802	1	UP	CAGGGGAACAGGCAGAGCAUG
97	vun-miR4415a-3p	11.547	31.1769	2.7	1.43296	0.722969	1	UP	UUGAUUCUCAUCACAACAUG
98	vun-miR482a-3p	856.788	20.7846	0.0242588	-5.36535	0.495539	1	DOWN	UCUUCCCAAUUCCGCCCAUUCCUA
99	vun-miR482c-5p	21.362	3.4641	0.162162	-2.62449	0.578145	1	DOWN	UUGUGGGAAUGGGCUGAUUGG
100	vun-miR5037c	2.3094	17.3205	7.5	2.90689	0.445809	1	UP	AGUGGAACUUUGAGGCCUGC
101	vun-miR530a	0.57735	109.119	189	7.56224	0.231785	1	UP	UGCAUUUGCACCUGCGCUUU
102	vun-miR5770a	1.1547	346.41	300	8.22882	0.279294	1	UP	UUAGGACUAUGGUUUGGACGA
103	vun-miR5786	1.73205	32.909	19	4.24793	0.327408	1	UP	UGUCGCAGGAUAGAGGGCACU
104	vun-miR6300	1989.55	61040.9	30.6808	4.93926	0.438117	1	UP	GUCGUUGUAGUAUAGUGG
105	vun-miR9726	161.081	3.4641	0.0215054	-5.53916	0.413018	1	DOWN	UAUAGGCAUCAUUUUUUUCUU
106	vun-miR396a	28.2902	1.73205	0.0612245	-4.02975	0.417686	1	DOWN	CACAGCUUUCUUGAACUUUCU
107	vun-miR6483	30.0222	6.9282	0.230769	-2.11548	0.674885	1	DOWN	UAUUGUAGAAAUUUUCAGGAUC
108	vun-miR156w	6.35085	150.688	23.7273	4.56847	0.446558	1	UP	UUGACAGAAGAGAGAGAGCAC
109	vun-miR167i	28026.9	219.97	0.00784855	-6.99336	0.340824	1	DOWN	UGAAGCUGCCAGCAUGAUCUUA
110	vun-miR396a	42.7239	1.73205	0.0405405	-4.62449	0.383496	1	DOWN	UUCCACAGCUUUCUUGAACA
111	vun-miR482a-5p	13.2791	32.909	2.47826	1.30933	0.747009	1	UP	GGAAUGGGCUGUUUGGGAAG
112	vun-miR159c	329.09	1.73205	0.00526316	-7.56986	0.347372	1	DOWN	AUUGGAAUGAAGGGAGCUCU
113	vun-miR160g	17.8979	5.19615	0.290323	-1.78427	0.718617	1	DOWN	UGCCUGGCUCCCUGUAUGCCA
114	vun-miR156c-3p	1.73205	8.66025	5	2.32193	0.506686	1	UP	UGCUUACUCUCUAUCUGUCACC
115	vun-miR156d-3p	10.9697	1.73205	0.157895	-2.66297	0.571948	1	DOWN	GCUCACUUAUCUUUCUGUCAA
116	vun-miR156g-5p	9.81495	3.4641	0.352941	-1.5025	0.775748	1	DOWN	UUGACAGAAGAUAGAGGGCAC
117	vun-miR156i-3p	273.087	1.73205	0.00634249	-7.30073	0.350712	1	DOWN	UGCUCACUUCUCUUUCUGUCA
118	vun-miR156j	12.1244	3.4641	0.285714	-1.80735	0.715285	1	DOWN	UGACAGAAGAGGGUGAGCAC
119	vun-miR166d	150.688	24.2487	0.16092	-2.63559	0.703667	1	DOWN	UCGGGCCAGGCUUCAUUCCCC
120	vun-miR166e-5p	691.666	6.9282	0.0100167	-6.64145	0.405391	1	DOWN	GGAAUGUUGGCUGGCUCGAGG
121	vun-miR168a	9.2376	3.4641	0.375	-1.41504	0.79479	1	DOWN	GCUUGGUGCUGGUCGGGAA
122	vun-miR172c-5p	2229.73	971.681	0.435785	-1.19831	0.913621	1	DOWN	GUAGCAUCAUCAAGAUUCACA
123	vun-miR2199	412.228	2445.66	5.93277	2.56871	0.723588	1	UP	UGAUACACUAGCACGGGUCAC
124	vun-miR2655b	4.04145	1.73205	0.428571	-1.22239	0.924182	1	DOWN	CGUUUUUGUCCCUUAACUUU
125	vun-miR319a-5p	3.4641	25.9808	7.5	2.90689	0.469115	1	UP	GAGCUUCCUUCAGUCCACUC
126	vun-miR319d-5p	2.88675	51.9615	18	4.16993	0.377301	1	UP	GAGCUUUCUUCAGUCCACUC
127	vun-miR5255	19.6299	6.9282	0.352941	-1.5025	0.773772	1	DOWN	UGACUUGAUUGAGGACAUGGG
128	vun-miR479a	152.42	1169.13	7.67045	2.93931	0.684502	1	UP	CGUGAUAUUGGUUUGGCUCAUC
129	vun-miR156l-3p	0.57735	1115.44	1932	10.9159	0.207929	1	UP	GCUCACUUCUCUUUCUGUCAG
130	vun-miR159b	5.19615	43.3013	8.33333	3.05889	0.490571	1	UP	UUUGGAUUGAAGGGAGCUCUG
131	vun-miR159c	98.1495	13.8564	0.141176	-2.82443	0.650093	1	DOWN	UUGGAUUGAAGGGAGCUCCA
132	vun-miR166e-3p	44.456	6.9282	0.155844	-2.68182	0.606539	1	DOWN	UCGAACCAGGCUUCAUUCCCC
133	vun-miR166i-3p	36.9504	3.4641	0.09375	-3.41504	0.493296	1	DOWN	UCGGAUCAGGCUUCAUUCC
134	vun-miR166k-3p	86.0252	17.3205	0.201342	-2.31228	0.713463	1	DOWN	UCGGACCAGGCUUCAAUCCC
135	vun-miR395o	14.4338	1.73205	0.12	-3.05889	0.520321	1	DOWN	UGAAGUGUUUGGAGGAACUC
136	vun-miR396b-3p	1868.31	6.9282	0.00370828	-8.07503	0.329698	1	DOWN	GUUCAAUAAAGCUGUGGGAA
137	vun-miR5083	13.2791	3.4641	0.26087	-1.9386	0.691546	1	DOWN	AGACUACAAUUAUCUGAUC
138	vun-miR5538	13.2791	3.4641	0.26087	-1.9386	0.691546	1	DOWN	ACUGAACUCAAUCACUUGCUGC
139	vun-miR3711	1.1547	216.506	187.5	7.55075	0.278921	1	UP	AGGCCCUCCUUCUAGCGCCA
140	vun-miR159	578.505	55.4256	0.0958084	-3.3837	0.673574	1	DOWN	UUUGGGUUGAAGGGAGCUCUA
141	vun-miR2916	4.6188	32.909	7.125	2.83289	0.498492	1	UP	UGGGGGCUCGAAGACGAUCA
142	vun-miR1511-5p	48.4974	10.3923	0.214286	-2.22239	0.686515	1	DOWN	UAACUUGACUCUGAUACCA
143	vun-miR171e	237.291	1.73205	0.00729927	-7.09803	0.351948	1	DOWN	GAUAUUGGUCCGGUUCAAUAA
144	vun-miR399l	96.4175	15.5885	0.161677	-2.62882	0.675709	1	DOWN	GCCAAAGAAGAGUUGCCCU
145	vun-miR166m	61.1991	15.5885	0.254717	-1.97303	0.74377	1	DOWN	UCGGACCAGGCAUCAUUCC
146	vun-miR319d-3p	3184.66	136.832	0.0429659	-4.54066	0.57317	1	DOWN	CUUGGACUGAAGGGAGCUCCC
147	vun-miR390b	211.888	81.4064	0.384196	-1.38008	0.880362	1	DOWN	AAGCUCAGGAGGGAUAGCGCC
148	vun-miR894	785.774	93.5307	0.11903	-3.0706	0.709136	1	DOWN	CGUUUCACGUCAGGUUCACC
149	vun-miR159b	0.57735	1.73205	3	1.58496	0.95336	1	UP	UUGGAUUGAAGAGAGCUC
150	vun-miR166a	195.144	29.4449	0.150888	-2.72845	0.707418	1	DOWN	UCGGACCAGGCUUCAUUCCCC
151	vun-miR396	56315.9	126.44	0.00224519	-8.79895	0.214212	1	DOWN	UUCCACAGCUUUCUUGAACUU
152	vun-miR166p	103.346	15.5885	0.150838	-2.72893	0.666792	1	DOWN	UCGGACCAGGCUCCAUUCC
153	vun-miR166q	117.202	6.9282	0.0591133	-4.08037	0.513542	1	DOWN	UCGGACCAGGCUUCAUUCCUU
154	vun-miR6478	4996.97	128766	25.7688	4.68755	0.424181	1	UP	CCGACCUUAGCUCAGUUGGU
155	vun-miR482-5p	1.1547	16071.7	13918.5	13.7647	0.112196	1	UP	GGAAUGGGCUGAUUGGGAAGCA
156	vun-miR5139	4.6188	289.252	62.625	5.96867	0.389352	1	UP	AAACCUGGCUCUGAUACCA
157	vun-miR156e	4.04145	1.73205	0.428571	-1.22239	0.924182	1	DOWN	UGACAGAAGAGAGCGAGCAC
158	vun-miR167b-5p	19443.4	3.4641	0.000178163	-12.4545	0.142955	1	DOWN	UAAAGCUGCCAGCAUGAUCUGG
159	vun-miR171c	1.73205	6.9282	4	2	0.575153	1	UP	UAUUGGUCCGGUUCAAUGAGA
160	vun-miR403-5p	260.385	31.1769	0.119734	-3.0621	0.683965	1	DOWN	GUUUGUGCGUGAAUCUAAC
161	vun-miR408	37.5278	1.73205	0.0461538	-4.43741	0.392439	1	DOWN	UGCACUGCCUCUUCCCUGGCU
162	vun-miR159e	2.3094	22.5167	9.75	3.2854	0.40659	1	UP	UUUGGAUUGAAAGGAGCUCU
163	vun-miR166d-5p	11.547	88.3346	7.65	2.93546	0.577692	1	UP	GAAUGUCGUCUGGUUCGAGA
164	vun-miR167d-3p	70.4367	10.3923	0.147541	-2.76081	0.633911	1	DOWN	GAUCAUGUGGCUGCUUCACC
165	vun-miR393-3p	10.9697	27.7128	2.52632	1.33703	0.734859	1	UP	AUCAUGCGAUCUCUUAGGAA
166	vun-miR167b	18.4752	5.19615	0.28125	-1.83007	0.710344	1	DOWN	UGAAGCUGACAGCAUGAUCU
167	vun-miR156e	13.8564	5.19615	0.375	-1.41504	0.79115	1	DOWN	UGACAGAGGAGAGUGAGCAC
168	vun-miR159b	9.81495	1.73205	0.176471	-2.5025	0.597597	1	DOWN	CUUGGAGUGAAGGGAGCUCU
169	vun-miR2111-5p	626.425	133.368	0.212903	-2.23173	0.798327	1	DOWN	UAAUCUGCAUCCUGAGGU
170	vun-miR156a-3p	19.0526	1.73205	0.0909091	-3.45943	0.471017	1	DOWN	GCUCACUUCUCUCUCUGUCA
171	vun-miR156k-3p	0.57735	5.19615	9	3.16993	0.418491	1	UP	GCUCGCUUCUCUUUCUGUCAG
172	vun-miR159c-5p	434.167	24.2487	0.0558511	-4.16227	0.590344	1	DOWN	UUGGAUCGAAGGGAGCUC
173	vun-miR159i-3p	46.7654	13.8564	0.296296	-1.75489	0.762868	1	DOWN	UUUGGAGUGAAGGGAGCUCU
174	vun-miR164g-3p	16.1658	6.9282	0.428571	-1.22239	0.828015	1	DOWN	CACGUGCUCCCCUUCUCCA
175	vun-miR167c-3p	7.50555	3.4641	0.461538	-1.11548	0.866759	1	DOWN	UCAUGCUGUGACAGCCUCACU
176	vun-miR169b-3p	175.514	8.66025	0.0493421	-4.34104	0.518725	1	DOWN	GGCAAGUGGUUCUUGGCUAC
177	vun-miR396g-3p	4.6188	53.6936	11.625	3.53916	0.451809	1	UP	UCUUCCACAGCUUUCUUGAAC
178	vun-miR399b-3p	209.001	10.3923	0.0497238	-4.32992	0.533116	1	DOWN	UGCCAAAGGAGAGUUGUCCUG
			.

## Sheet: DL vs DR
Table S5d. Differentially expressed drought induced miRNAs (DE) in drought stressed leaf (DL) and root (DR) sRNA libraries of cowpea.
Sl. No.	miRNA ID	DL Expression	DR Expression	FoldChange	log2FoldChange	P Value	Adjusted P Value	Regulation	Sequence
1	vun-miR160	2041.11	159.73	0.0782561	-3.67565	0.733764	1	DOWN	UGCCUGGCUCCCUGUAUGCCA
2	vun-miR168	1601.77	9.2866	0.00579771	-7.4303	0.457355	1	DOWN	GAUCCCGCCUUGCAUCAACUGAAU
3	vun-miR156b-3p	27.9973	3.71464	0.132678	-2.91399	0.675169	1	DOWN	GCUCACGUCUCUUUCUGUCAGU
4	vun-miR157d-3p	194.366	52.005	0.267562	-1.90206	0.879115	1	DOWN	GCUCUCUAGGCUUCUGUCAUC
5	vun-miR167b-3p	24.7669	5.57196	0.224976	-2.15215	0.770545	1	DOWN	GGUCAUGCUGUGACAGCCUCACU
6	vun-miR396-3p	3838.33	338.032	0.0880676	-3.50524	0.753078	1	DOWN	AAGCUCAAGAAAGCUGUGGGA
7	vun-miR159	303.663	18.5732	0.0611638	-4.03118	0.684571	1	DOWN	UUUGGACUGAAGGGAGCUCUA
8	vun-miR157c-3p	7208.24	1.85732	0.000257666	-11.9222	0.283707	1	DOWN	GCUCUCUAUACUUCUGUCA
9	vun-miR159a	426189	43557.9	0.102203	-3.29049	0.762676	1	DOWN	UUUGGAUUGAAGGGAGCUCUA
10	vun-miR159b-3p	76.9927	13.0012	0.168863	-2.56607	0.792106	1	DOWN	UUUGGAUUGAAGGGAUCUCUU
11	vun-miR159c	55.9947	5.57196	0.0995088	-3.32903	0.689908	1	DOWN	UUUGGAUUGAAGGGAGCUCC
12	vun-miR162b-3p	7623.35	1965.04	0.257767	-1.95586	0.890726	1	DOWN	UCGAUAAACCUCUGCAUCCAG
13	vun-miR165b	148.601	22.2878	0.149984	-2.73712	0.790641	1	DOWN	UCGGACCAGGCUUCAUACCCC
14	vun-miR167d	65.1476	7.42928	0.114038	-3.13242	0.723258	1	DOWN	UGAAGCUGCCAGCAUGAUCUGG
15	vun-miR168b-5p	12897.1	2583.53	0.200319	-2.31963	0.859712	1	DOWN	UCGCUUGGUGCAGGUCGGGAA
16	vun-miR169b-5p	1930.74	63.1489	0.0327071	-4.93425	0.627475	1	DOWN	CAGCCAAGGAUGACUUGCCGG
17	vun-miR170-3p	5.3841	1.85732	0.344964	-1.53548	0.883311	1	DOWN	UUGAGCCGUGUCAAUAUC
18	vun-miR171b-3p	781.233	22.2878	0.0285291	-5.13142	0.603838	1	DOWN	UUGAGCCGUGCCAAUAUCACG
19	vun-miR172a	313.893	27.8598	0.0887557	-3.49402	0.733689	1	DOWN	AGAAUCUUGAUGAUGCUGCAU
20	vun-miR2111a-5p	426.421	26.0025	0.0609784	-4.03556	0.68939	1	DOWN	UAAUCUGCAUCCUGAGGUUUA
21	vun-miR394b-5p	519.566	46.433	0.0893689	-3.48408	0.740131	1	DOWN	UUGGCAUUCUGUCCACCUCC
22	vun-miR5653	10.2298	1.85732	0.18156	-2.46148	0.714967	1	DOWN	ACUCAACUCAACUUAACCCA
23	vun-miR166e-3p	52.7642	1.85732	0.0352004	-4.82827	0.550689	1	DOWN	CUCGGACCAGGCUUCAUUCCC
24	vun-miR7782-5p	19.3828	1.85732	0.0958233	-3.38348	0.601679	1	DOWN	AACUUGCUCUGAUACCAUG
25	vun-miR156	5708.22	956.52	0.167569	-2.57718	0.836514	1	DOWN	UUGACAGAAGAUAGAGAGCAC
26	vun-miR167b	95.2986	3.71464	0.038979	-4.68116	0.59925	1	DOWN	UGAAGCUGCCAGCAUGAUCUA
27	vun-miR167d	13.4603	1.85732	0.137986	-2.85741	0.664328	1	DOWN	UGAAGCUGCCAGCAUGAUC
28	vun-miR168b	4.30728	1.85732	0.431205	-1.21356	0.965029	1	DOWN	UCGCUUGGUGCAGGUCGAGAA
29	vun-miR156b	186.828	72.4355	0.387711	-1.36694	0.92968	1	DOWN	UGACAGAAGAGAGUGAGCAU
30	vun-miR845	60.8403	3.71464	0.0610555	-4.03373	0.628086	1	DOWN	CAUCAUAGUGGUAUCAGAGC
31	vun-miR160d	2568.22	70.5782	0.0274814	-5.1854	0.610448	1	DOWN	UGCCUGGCUCCCUGAAUGCCA
32	vun-miR167d	86855.3	26.0025	0.000299377	-11.7057	0.266939	1	DOWN	UGAAGCUGCCAGCAUGAUCUGA
33	vun-miR408	51.6874	3.71464	0.0718675	-3.79852	0.634238	1	DOWN	UGCACUGCCUCUUCCCUGG
34	vun-miR156c	25.3053	3.71464	0.146793	-2.76814	0.686768	1	DOWN	UGUCAGAAGAGAGUGAGCAC
35	vun-miR1507a	264326	35467.4	0.13418	-2.89775	0.802182	1	DOWN	UCUCAUUCCAUACAUCGUCUGA
36	vun-miR1511	367.196	143.014	0.389475	-1.3604	0.933752	1	DOWN	AACCAGGCUCUGAUACCAUG
37	vun-miR1514a-3p	10.7682	1.85732	0.172482	-2.53548	0.705057	1	DOWN	AUGCCUAUUUUAAAAUGAAAA
38	vun-miR1514a-5p	9737.69	1340.99	0.137711	-2.86029	0.812718	1	DOWN	UUCAUUUUUAAAAUAGGCAUU
39	vun-miR1515a	17993.7	2050.48	0.113956	-3.13345	0.788566	1	DOWN	UCAUUUUGCGUGCAAUGAUCUG
40	vun-miR159a-5p	3093.17	406.753	0.131501	-2.92686	0.803066	1	DOWN	GAGCUCCUUGAAGUCCAAUUG
41	vun-miR159d	48.9953	9.2866	0.189541	-2.39942	0.786547	1	DOWN	AGCUGCUCAGCUAUGGAUCCC
42	vun-miR162a	24.2285	7.42928	0.306634	-1.70541	0.835612	1	DOWN	UCGAUAAACCUCUGCAUCCA
43	vun-miR168b	8.61456	1.85732	0.215602	-2.21356	0.752054	1	DOWN	UCGCUUGGUGCAGGUCGGG
44	vun-miR169l-5p	20.4596	1.85732	0.0907799	-3.46148	0.594762	1	DOWN	CAGCCAAGAAUGACUUGCCGG
45	vun-miR169n-5p	1092.43	22.2878	0.020402	-5.61515	0.570337	1	DOWN	CAGCCAAGGGUGAUUUGCCGG
46	vun-miR171m	5081.52	89.1514	0.0175442	-5.83286	0.567792	1	DOWN	UUGAGCCGCGUCAAUAUCUCA
47	vun-miR171o-5p	50.0721	1.85732	0.0370929	-4.75271	0.551057	1	DOWN	AGAUAUUGGUACGGUUCAAUC
48	vun-miR172c	20.998	5.57196	0.265357	-1.91399	0.797449	1	DOWN	GGAAUCUUGAUGAUGCUGCAG
49	vun-miR172i-5p	536.795	104.01	0.193761	-2.36765	0.843777	1	DOWN	GCAGCAGCAUCAAGAUUCACA
50	vun-miR2111d	77.5311	5.57196	0.0718675	-3.79852	0.6668	1	DOWN	GUCCUUGGGAUGCAGAUUAC
51	vun-miR395d	1247.5	1.85732	0.00148884	-9.3916	0.373391	1	DOWN	UGAAGUGUUUGGGGGAACUUU
52	vun-miR395i	956.755	1.85732	0.00194127	-9.00878	0.389342	1	DOWN	AUGAAGUGUUUGGGGGAACUC
53	vun-miR399d	324.661	1.85732	0.00572079	-7.44957	0.461066	1	DOWN	UGCCAAAGGAGAUUUGCCCAG
54	vun-miR403a	3812.48	354.748	0.0930491	-3.42586	0.760004	1	DOWN	UUAGAUUCACGCACAAACUUG
55	vun-miR482c-5p	10.2298	1.85732	0.18156	-2.46148	0.714967	1	DOWN	UUGUGGGAAUGGGCUGAUUGG
56	vun-miR5374-3p	5.92251	1.85732	0.313603	-1.67299	0.851736	1	DOWN	UUCAAAUGUCAGAUUAUAAAA
57	vun-miR5374-5p	487.8	1.85732	0.00380755	-8.03692	0.434479	1	DOWN	UUAUAAUCUGACAUCUGGAAU
58	vun-miR5770a	2141.8	332.46	0.155225	-2.68757	0.822464	1	DOWN	UUAGGACUAUGGUUUGGACGA
59	vun-miR156w	1347.1	131.87	0.0978914	-3.35267	0.759298	1	DOWN	UUGACAGAAGAGAGAGAGCAC
60	vun-miR482a-5p	6.99933	1.85732	0.265357	-1.91399	0.802571	1	DOWN	GGAAUGGGCUGUUUGGGAAG
61	vun-miR156c-3p	33.3814	3.71464	0.111279	-3.16775	0.658633	1	DOWN	UGCUUACUCUCUAUCUGUCACC
62	vun-miR156j	16.1523	1.85732	0.114988	-3.12045	0.630228	1	DOWN	UGACAGAAGAGGGUGAGCAC
63	vun-miR166d	151.832	16.7159	0.110095	-3.18318	0.746573	1	DOWN	UCGGGCCAGGCUUCAUUCCCC
64	vun-miR166e-5p	247.669	20.4305	0.0824913	-3.59961	0.719163	1	DOWN	GGAAUGUUGGCUGGCUCGAGG
65	vun-miR168a	11.3066	3.71464	0.328537	-1.60587	0.84162	1	DOWN	GCUUGGUGCUGGUCGGGAA
66	vun-miR172c-5p	2750.74	351.033	0.127614	-2.97014	0.798549	1	DOWN	GUAGCAUCAUCAAGAUUCACA
67	vun-miR2650	195.981	5.57196	0.0284311	-5.13639	0.584316	1	DOWN	UUAAAUAUGUUUUUAGUCC
68	vun-miR5255	43.0728	1.85732	0.0431205	-4.53548	0.552659	1	DOWN	UGACUUGAUUGAGGACAUGGG
69	vun-miR162b	12.3834	3.71464	0.299968	-1.73712	0.819482	1	DOWN	UCGAUAAUCCUCUGCAUCCAG
70	vun-miR166e-3p	60.3019	1.85732	0.0308003	-5.02091	0.550192	1	DOWN	UCGAACCAGGCUUCAUUCCCC
71	vun-miR166i-3p	47.9185	1.85732	0.03876	-4.68929	0.551452	1	DOWN	UCGGAUCAGGCUUCAUUCC
72	vun-miR395o	92.6066	3.71464	0.0401121	-4.63982	0.601662	1	DOWN	UGAAGUGUUUGGAGGAACUC
73	vun-miR396b-3p	2504.15	7.42928	0.00296679	-8.39688	0.40977	1	DOWN	GUUCAAUAAAGCUGUGGGAA
74	vun-miR3711	35.5351	1.85732	0.0522672	-4.25795	0.555805	1	DOWN	AGGCCCUCCUUCUAGCGCCA
75	vun-miR159	372.58	40.861	0.109671	-3.18875	0.764532	1	DOWN	UUUGGGUUGAAGGGAGCUCUA
76	vun-miR171e	4.30728	1.85732	0.431205	-1.21356	0.965029	1	DOWN	GAUAUUGGUCCGGUUCAAUAA
77	vun-miR399l	379.041	11.1439	0.0294003	-5.08802	0.601649	1	DOWN	GCCAAAGAAGAGUUGCCCU
78	vun-miR6288a	10.7682	1.85732	0.172482	-2.53548	0.705057	1	DOWN	GAAAAUGACAAGUGGCUAG
79	vun-miR166m	70.5317	5.57196	0.0789993	-3.66202	0.674507	1	DOWN	UCGGACCAGGCAUCAUUCC
80	vun-miR319d-3p	142.14	1.85732	0.0130668	-6.25795	0.508822	1	DOWN	CUUGGACUGAAGGGAGCUCCC
81	vun-miR390b	827.536	61.2916	0.0740651	-3.75506	0.719302	1	DOWN	AAGCUCAGGAGGGAUAGCGCC
82	vun-miR159b	171.214	7.42928	0.0433917	-4.52644	0.627851	1	DOWN	UUGGAUUGAAGAGAGCUC
83	vun-miR166a	118397	24.1452	0.000203934	-12.2596	0.24695	1	DOWN	UCGGACCAGGCUUCAUUCCCC
84	vun-miR396	179.829	74.2928	0.41313	-1.27533	0.937874	1	DOWN	UUCCACAGCUUUCUUGAACUU
85	vun-miR408	31.2278	3.71464	0.118953	-3.07154	0.664304	1	DOWN	AUGCACUGCCUCUUCCCUGGC
86	vun-miR166p	108.22	7.42928	0.0686495	-3.86461	0.67155	1	DOWN	UCGGACCAGGCUCCAUUCC
87	vun-miR167f-3p	11.845	3.71464	0.313603	-1.67299	0.830285	1	DOWN	AGAUCAUGUGGCAGUUUCACC
88	vun-miR396g-5p	112.528	37.1464	0.330109	-1.59899	0.90186	1	DOWN	UUCCACGGCUUUCUUGAACUU
89	vun-miR6478	5903.13	1.85732	0.000314633	-11.634	0.293161	1	DOWN	CCGACCUUAGCUCAGUUGGU
90	vun-miR167b-5p	4232.98	1.85732	0.000438774	-11.1542	0.309104	1	DOWN	UAAAGCUGCCAGCAUGAUCUGG
91	vun-miR171c	106.605	1.85732	0.0174224	-5.84291	0.526481	1	DOWN	UAUUGGUCCGGUUCAAUGAGA
92	vun-miR319c-5p	22.0748	5.57196	0.252413	-1.98614	0.788912	1	DOWN	GAGCUUCCUUCAGCCCAC
93	vun-miR408	26.3821	9.2866	0.352004	-1.50634	0.869001	1	DOWN	UGCACUGCCUCUUCCCUGGCU
94	vun-miR167d-3p	168.522	5.57196	0.0330636	-4.91861	0.596524	1	DOWN	GAUCAUGUGGCUGCUUCACC
95	vun-miR393-3p	28.5357	5.57196	0.195263	-2.35651	0.7504	1	DOWN	AUCAUGCGAUCUCUUAGGAA
96	vun-miR2118	6839.42	3419.33	0.499944	-1.00016	0.968167	1	DOWN	UUGCCGAUUCCACCCAUUCCUA
97	vun-miR396a	18.8444	3.71464	0.197122	-2.34284	0.729529	1	DOWN	UCCACAGCUUUCUUGAACUA
98	vun-miR156a-3p	19.3828	1.85732	0.0958233	-3.38348	0.601679	1	DOWN	GCUCACUUCUCUCUCUGUCA
99	vun-miR169b-3p	3.76887	1.85732	0.492805	-1.02091	1	1	DOWN	GGCAAGUGGUUCUUGGCUAC
100	vun-miR399b-3p	679.474	7.42928	0.0109339	-6.51505	0.50726	1	DOWN	UGCCAAAGGAGAGUUGUCCUG
101	vun-miR399e-5p	86.1456	1.85732	0.0215602	-5.53548	0.540337	1	DOWN	GGGCUUCUCUUUGUUGGCAGG
102	vun-miR156	2.15364	78.0074	36.2212	5.17876	0.48516	1	UP	CUGACAGAAGAGAGUGAGCAC
103	vun-miR393-5p	5.92251	14.8586	2.50883	1.32701	0.766701	1	UP	UUCCAAAGGGAUCGCAUUGAU
104	vun-miR166a-5p	0.53841	5.57196	10.3489	3.37141	0.447852	1	UP	GGACUGUUGUCUGGCUCGAGG
105	vun-miR168a-3p	2.69205	215.449	80.0316	6.3225	0.455243	1	UP	CCCGCCUUGCAUCAACUGAAU
106	vun-miR319b	18.8444	2999.57	159.176	7.31448	0.436894	1	UP	UUGGACUGAAGGGAGCUCCCU
107	vun-miR390a-3p	16.1523	85.4367	5.28944	2.40312	0.738637	1	UP	CGCUAUCUAUCCUGAGUUUCA
108	vun-miR396a-3p	452.803	7466.43	16.4894	4.04346	0.66408	1	UP	GUUCAAUAAAGCUGUGGGAAG
109	vun-miR8175	25.3053	534.908	21.1382	4.40178	0.613557	1	UP	GAUCCCCGGCAACGGCGCCA
110	vun-miR156a	17.2291	1868.46	108.448	6.76086	0.464049	1	UP	UGACAGAAGAGAGUGAGCACA
111	vun-miR397a	13.9987	215.449	15.3907	3.94399	0.630925	1	UP	UCAUUGAGUGCAGCGUUGAUG
112	vun-miR171d	6.99933	14.8586	2.12285	1.08601	0.804501	1	UP	UGAUUGAGCCGUGCCAAUAUC
113	vun-miR166b	1.07682	3.71464	3.44964	1.78644	0.739602	1	UP	UCGGACCAGGCUUCAUUCCCUU
114	vun-miR166a	1.61523	115.154	71.2925	6.15568	0.440023	1	UP	UCGGACCAGGCUUCAUUCCCCC
115	vun-miR166b	273.512	13688.4	50.0469	5.64521	0.548993	1	UP	UCGGACCAGGCUUCAUUCCCGU
116	vun-miR393	1.07682	74.2928	68.9928	6.10837	0.419338	1	UP	UCCAAAGGGAUCGCAUUGAUCU
117	vun-miR159f-3p	0.53841	7.42928	13.7986	3.78644	0.390284	1	UP	AUUGGAGUGAAGGGAGCUCC
118	vun-miR164b	0.53841	3.71464	6.89928	2.78644	0.582415	1	UP	UGGAGAAGCAGGGCACGUGC
119	vun-miR166c-5p	494.261	1392.99	2.81833	1.49484	0.851664	1	UP	GGAAUGUUGUCUGGCUCGAGG
120	vun-miR166h-5p	24.7669	107.725	4.34954	2.12086	0.772287	1	UP	GGAAUGUUGUUUGGCUCGAGG
121	vun-miR166k	4.84569	3902.23	805.299	9.65338	0.326789	1	UP	UCUCGGACCAGGCGUCAUUCC
122	vun-miR171b-3p	16.1523	131.87	8.16414	3.0293	0.694575	1	UP	CGAGCCGAAUCAAUAUCACUC
123	vun-miR171k-3p	8.07615	83.5794	10.3489	3.37141	0.644812	1	UP	UUGAGCCGCGCCAAUAUCACU
124	vun-miR171l	0.53841	16.7159	31.0467	4.95637	0.337959	1	UP	CGAUGUUGGUGAGGUUCAAUC
125	vun-miR171p	44.1496	2382.94	53.9742	5.7542	0.531302	1	UP	UUGAGCCGCGUCAAUAUCUUA
126	vun-miR319d	0.53841	1.85732	3.44964	1.78644	0.918397	1	UP	UGGACUGAAGGGGAGCUCCUUC
127	vun-miR319g	3.76887	24.1452	6.40647	2.67953	0.598603	1	UP	UUGGACUGAAGGGAGCUCCUUC
128	vun-miR319i	3.23046	588.77	182.256	7.50982	0.409606	1	UP	UUGGACUGAAGGGGAGCUCCUUC
129	vun-miR319p	53.841	215.449	4.00158	2.00057	0.798653	1	UP	UUUUGGACUGAAGGGAGCUCC
130	vun-miR396e	347.275	34458.9	99.2266	6.63265	0.483951	1	UP	UUCCACAGCUUUCUUGAACUGU
131	vun-miR396j	0.53841	11.1439	20.6978	4.37141	0.359587	1	UP	UCAAGACAGCUGUGGAAAA
132	vun-miR398c	24.2285	59.4342	2.45308	1.29459	0.835856	1	UP	UGUGUUCUCAGGUCGCCCCUG
133	vun-miR4415a-3p	1.07682	18.5732	17.2482	4.10837	0.409396	1	UP	UUGAUUCUCAUCACAACAUG
134	vun-miR482a-3p	2.15364	625.917	290.632	8.18305	0.377104	1	UP	UCUUCCCAAUUCCGCCCAUUCCUA
135	vun-miR5037c	1.61523	5.57196	3.44964	1.78644	0.685865	1	UP	AGUGGAACUUUGAGGCCUGC
136	vun-miR5041-3p	0.53841	1.85732	3.44964	1.78644	0.918397	1	UP	GUUGAGCAAGUUGAAGAUG
137	vun-miR530a	0.53841	53.8623	100.039	6.64443	0.355375	1	UP	UGCAUUUGCACCUGCGCUUU
138	vun-miR6300	3039.33	20597.7	6.77706	2.76066	0.762993	1	UP	GUCGUUGUAGUAUAGUGG
139	vun-miR9725	0.53841	1.85732	3.44964	1.78644	0.918397	1	UP	UUAAUUUUUUUGGAUCAG
140	vun-miR8739	0.53841	1.85732	3.44964	1.78644	0.918397	1	UP	CUAAAUAGUGACACGUGGCAU
141	vun-miR159b	1.61523	5.57196	3.44964	1.78644	0.685865	1	UP	UUUGGAUUGAAGGGAGCUCUC
142	vun-miR167i	277.82	8012.48	28.8406	4.85003	0.604094	1	UP	UGAAGCUGCCAGCAUGAUCUUA
143	vun-miR396a	0.53841	9.2866	17.2482	4.10837	0.370229	1	UP	UUCCACAGCUUUCUUGAACA
144	vun-miR160g	16.6907	588.77	35.2753	5.14059	0.558617	1	UP	UGCCUGGCUCCCUGUAUGCCA
145	vun-miR164d	1.07682	81.7221	75.892	6.24588	0.418768	1	UP	UGGAGAAGCAGGACACAUGCU
146	vun-miR2199	325.2	878.512	2.70145	1.43374	0.854162	1	UP	UGAUACACUAGCACGGGUCAC
147	vun-miR319a-5p	9.69138	24.1452	2.4914	1.31696	0.787716	1	UP	GAGCUUCCUUCAGUCCACUC
148	vun-miR477b	0.53841	3.71464	6.89928	2.78644	0.582415	1	UP	CUCUCCCUCAAGGGCUUCUC
149	vun-miR479a	51.149	663.063	12.9634	3.69637	0.672077	1	UP	CGUGAUAUUGGUUUGGCUCAUC
150	vun-miR156l-3p	3.76887	482.903	128.129	7.00146	0.435508	1	UP	GCUCACUUCUCUUUCUGUCAG
151	vun-miR159b	5.92251	14.8586	2.50883	1.32701	0.766701	1	UP	UUUGGAUUGAAGGGAGCUCUG
152	vun-miR159c	1.07682	9.2866	8.62409	3.10837	0.47923	1	UP	UUGGAUUGAAGGGAGCUCCA
153	vun-miR159f	2.15364	29.7171	13.7986	3.78644	0.488123	1	UP	CUUGGAUUGAAGGGAGCUCUA
154	vun-miR166k-3p	1.61523	5.57196	3.44964	1.78644	0.685865	1	UP	UCGGACCAGGCUUCAAUCCC
155	vun-miR5083	6.99933	18.5732	2.65357	1.40793	0.761677	1	UP	AGACUACAAUUAUCUGAUC
156	vun-miR2916	1.07682	68.7208	63.8183	5.9959	0.418469	1	UP	UGGGGGCUCGAAGACGAUCA
157	vun-miR894	439.343	2264.07	5.15332	2.3655	0.788279	1	UP	CGUUUCACGUCAGGUUCACC
158	vun-miR482-5p	1.07682	20.4305	18.973	4.24588	0.402762	1	UP	GGAAUGGGCUGAUUGGGAAGCA
159	vun-miR5139	1.07682	380.751	353.588	8.46592	0.362268	1	UP	AAACCUGGCUCUGAUACCA
160	vun-miR5141	0.53841	5.57196	10.3489	3.37141	0.447852	1	UP	UUAUCUGUCAGUCGCGUCGGGU
161	vun-miR403-5p	1.07682	18.5732	17.2482	4.10837	0.409396	1	UP	GUUUGUGCGUGAAUCUAAC
162	vun-miR159e	12.3834	31.5744	2.54973	1.35035	0.79875	1	UP	UUUGGAUUGAAAGGAGCUCU
163	vun-miR166d-5p	3.23046	24.1452	7.47421	2.90192	0.569383	1	UP	GAAUGUCGUCUGGUUCGAGA
164	vun-miR2111-5p	0.53841	72.4355	134.536	7.07185	0.369058	1	UP	UAAUCUGCAUCCUGAGGU
165	vun-miR156h-3p	26.3821	313.887	11.8977	3.57261	0.672551	1	UP	GCUCACUACUCUUUCUGUCA
166	vun-miR159c-5p	1.07682	20.4305	18.973	4.24588	0.402762	1	UP	UUGGAUCGAAGGGAGCUC
167	vun-miR159i-3p	13.4603	27.8598	2.06978	1.04948	0.830931	1	UP	UUUGGAGUGAAGGGAGCUCU

## Sheet: common DE
Table S5e. Common differentially expressed drought induced miRNAs (DE) in leaf and root sRNA libraries of cowpea.
Sl.no.	miRNA ID	CL Expression	DL Expression	log2FoldChange	Regulation	CR Expression	DR Expression	log2FoldChange	Regulation	Sequence
1	vun-miR159b-3p	1005	143	-2.81311	DOWN	49.0576	9.27482	-2.40309	DOWN	UUUGGAUUGAAGGGAUCUCUU
2	vun-miR164b-5p	12	4	-1.58496	DOWN	1209.84	2.64995	-8.83463	DOWN	UGGAGAAGCAGGGCACGUGCA
3	vun-miR166a-5p	7	1	-2.80735	DOWN	8.30205	3.97492	-1.06254	DOWN	GGACUGUUGUCUGGCUCGAGG
4	vun-miR166d-5p	20	6	-1.73697	DOWN	38.4913	17.2247	-1.16006	DOWN	GAAUGUCGUCUGGUUCGAGA
5	vun-miR166e-3p	187662	98	-10.9031	DOWN	10324	1.32497	-12.9277	DOWN	CUCGGACCAGGCUUCAUUCCC
6	vun-miR167f-3p	49	22	-1.15528	DOWN	13.5852	2.64995	-2.358	DOWN	AGAUCAUGUGGCAGUUUCACC
7	vun-miR169b-3p	304	7	-5.44057	DOWN	3.77366	1.32497	-1.51	DOWN	GGCAAGUGGUUCUUGGCUAC
8	vun-miR319c-5p	87	41	-1.08539	DOWN	11.321	3.97492	-1.51	DOWN	GAGCUUCCUUCAGCCCAC
9	vun-miR319d	8066	1	-12.9776	DOWN	5.28312	1.32497	-1.99543	DOWN	UGGACUGAAGGGGAGCUCCUUC
10	vun-miR319d-3p	5516	264	-4.38501	DOWN	59.6238	1.32497	-5.49185	DOWN	CUUGGACUGAAGGGAGCUCCC
11	vun-miR319g	12397	7	-10.7903	DOWN	663.409	17.2247	-5.26735	DOWN	UUGGACUGAAGGGAGCUCCUUC
12	vun-miR393-5p	40	11	-1.8625	DOWN	73.209	10.5998	-2.78799	DOWN	UUCCAAAGGGAUCGCAUUGAU
13	vun-miR396a	103	35	-1.55722	DOWN	25.6609	2.64995	-3.27554	DOWN	UCCACAGCUUUCUUGAACUA
14	vun-miR8739	48	1	-5.58496	DOWN	7.54732	1.32497	-2.51	DOWN	CUAAAUAGUGACACGUGGCAU
15	vun-miR156c	22	47	1.09516	UP	6.03786	2.64995	-1.18807	DOWN	UGUCAGAAGAGAGUGAGCAC
16	vun-miR160a-3p	9	21	1.22239	UP	18.1136	5.2999	-1.77303	DOWN	GCGUAUGAGGAGCCAAGCAUA
17	vun-miR167d	5	25	2.32193	UP	3.01893	1.32497	-1.18807	DOWN	UGAAGCUGCCAGCAUGAUC
18	vun-miR167d	168	161318	9.90723	UP	6157.1	18.5496	-8.37472	DOWN	UGAAGCUGCCAGCAUGAUCUGA
19	vun-miR168b	2	16	3	UP	3.01893	1.32497	-1.18807	DOWN	UCGCUUGGUGCAGGUCGGG
20	vun-miR171c	3	198	6.04439	UP	3.01893	1.32497	-1.18807	DOWN	UAUUGGUCCGGUUCAAUGAGA
21	vun-miR171m	4534	9438	1.0577	UP	2086.08	63.5987	-5.03565	DOWN	UUGAGCCGCGUCAAUAUCUCA
22	vun-miR2650	94	364	1.95321	UP	12.8304	3.97492	-1.69057	DOWN	UUAAAUAUGUUUUUAGUCC
23	vun-miR3711	2	66	5.04439	UP	94.3415	1.32497	-6.15386	DOWN	AGGCCCUCCUUCUAGCGCCA
24	vun-miR393-3p	19	53	1.47999	UP	12.0757	3.97492	-1.60311	DOWN	AUCAUGCGAUCUCUUAGGAA
25	vun-miR395d	356	2317	2.70231	UP	3.77366	1.32497	-1.51	DOWN	UGAAGUGUUUGGGGGAACUUU
26	vun-miR5255	34	80	1.23447	UP	3.01893	1.32497	-1.18807	DOWN	UGACUUGAUUGAGGACAUGGG
27	vun-miR156i-3p	473	92	-2.36213	DOWN	0.754732	52.999	6.13386	UP	UGCUCACUUCUCUUUCUGUCA
28	vun-miR159i-3p	81	25	-1.69599	DOWN	6.03786	19.8746	1.71882	UP	UUUGGAGUGAAGGGAGCUCU
29	vun-miR166a	134	3	-5.48113	DOWN	0.754732	82.1484	6.76612	UP	UCGGACCAGGCUUCAUUCCCCC
30	vun-miR166e-5p	1198	460	-1.38092	DOWN	3.01893	14.5747	2.27136	UP	GGAAUGUUGGCUGGCUCGAGG
31	vun-miR167i	48544	516	-6.55578	DOWN	95.851	5715.94	5.89805	UP	UGAAGCUGCCAGCAUGAUCUUA
32	vun-miR172i-5p	3547	997	-1.83093	DOWN	0.754732	74.1985	6.61928	UP	GCAGCAGCAUCAAGAUUCACA
33	vun-miR2916	8	2	-2	DOWN	14.3399	49.024	1.77345	UP	UGGGGGCUCGAAGACGAUCA
34	vun-miR393	257	2	-7.00562	DOWN	5.28312	52.999	3.3265	UP	UCCAAAGGGAUCGCAUUGAUCU
35	vun-miR396a	74	1	-6.20945	DOWN	0.754732	6.62487	3.13386	UP	UUCCACAGCUUUCUUGAACA
36	vun-miR396k-3p	7197	12	-9.22822	DOWN	0.754732	2.64995	1.81193	UP	GCUCAGGAAAGCUGUGGGAGA
37	vun-miR397a	1236	26	-5.57102	DOWN	0.754732	153.697	7.66991	UP	UCAUUGAGUGCAGCGUUGAUG
38	vun-miR398c	948	45	-4.39689	DOWN	10.5662	42.3992	2.00457	UP	UGUGUUCUCAGGUCGCCCCUG
39	vun-miR482a-3p	1484	4	-8.53528	DOWN	9.05678	446.516	5.62357	UP	UCUUCCCAAUUCCGCCCAUUCCUA
40	vun-miR5139	8	2	-2	DOWN	126.04	271.62	1.1077	UP	AAACCUGGCUCUGAUACCA
41	vun-miR9726	279	22	-3.66469	DOWN	1.50946	5.2999	1.81193	UP	UAUAGGCAUCAUUUUUUUCUU
42	vun-miR156b-3p	2	52	4.70044	UP	0.754732	2.64995	1.81193	UP	GCUCACGUCUCUUUCUGUCAGU
43	vun-miR159b	1	318	8.31288	UP	0.754732	5.2999	2.81193	UP	UUGGAUUGAAGAGAGCUC
44	vun-miR159d	9	91	3.33787	UP	3.01893	6.62487	1.13386	UP	AGCUGCUCAGCUAUGGAUCCC
45	vun-miR159e	4	23	2.52356	UP	9.81151	22.5246	1.19895	UP	UUUGGAUUGAAAGGAGCUCU
46	vun-miR164e-5p	1	1761	10.7822	UP	4.52839	1102.38	7.9274	UP	UGGAGAAGCAGGGCACGUGCAA
47	vun-miR166b	2	508	7.98868	UP	2.2642	9765.06	12.0744	UP	UCGGACCAGGCUUCAUUCCCGU
48	vun-miR169b-5p	45	3586	6.31631	UP	2.2642	45.0491	4.31443	UP	CAGCCAAGGAUGACUUGCCGG
49	vun-miR171g	5	12	1.26303	UP	1.50946	5.2999	1.81193	UP	UUGAGCCGCGCCAAUAUCU
50	vun-miR171p	30	82	1.45066	UP	64.1522	1699.94	4.72784	UP	UUGAGCCGCGUCAAUAUCUUA
51	vun-miR2655b	7	34	2.28011	UP	0.754732	10.5998	3.81193	UP	CGUUUUUGUCCCUUAACUUU
52	vun-miR395o	25	172	2.78241	UP	0.754732	2.64995	1.81193	UP	UGAAGUGUUUGGAGGAACUC
53	vun-miR403a	98	7081	6.17503	UP	0.754732	253.07	8.38936	UP	UUAGAUUCACGCACAAACUUG
54	vun-miR408	5	58	3.53605	UP	0.754732	2.64995	1.81193	UP	AUGCACUGCCUCUUCCCUGGC

## Sheet: novel DE
Table S5f. Differentially expressed drought induced novel miRNAs (DE) in leaf and root sRNA libraries of cowpea.
miRNA Name	miRNA	CL Expression	CR Expression	FoldChange	log2FoldChange	P Value	Adjusted P Value	Regulation
Vun_Novel_2	UGCAGCAAGAUCAAGAUUCACA	6.48745	359.463	55.4091	5.79205	0.788976	0.933313	UP
Vun_Novel_27	GGCUGGGAAGAGACAGAGCACGA	208.188	32.2161	0.154745	-2.69203	0.916943	0.948562	DOWN
Vun_Novel_96	UUUGAUUGUAGAUGGCUUUGGC	48.361	13.5647	0.280488	-1.83399	0.949673	0.977924	DOWN
	miRNA	CL Expression	DL Expression	FoldChange	log2FoldChange	P Value	Adjusted P Value	Regulation
Vun_Novel_251	GGCCGCAUAGUGCAGUGGAGG	22.834	74.1877	3.249	1.7	0.843568	0.901583	UP
Vun_Novel_474	CAAAAGCAAAUUAACUCAGAGC	10.3791	4.81738	0.464143	-1.10736	0.947667	1	DOWN
Vun_Novel_367	UGCUCUCUAGGCUUCUGUCAUCC	25.9477	6.74434	0.25992	-1.94386	0.859168	0.916553	DOWN
	miRNA	CR Expression	DR Expression	FoldChange	log2FoldChange	P Value	Adjusted P Value	Regulation
Vun_Novel_9	AUUUCAGUGUCAUUGCCAUUCUC	35.9258	15.9217	0.443182	-1.17403	0.888597	0.951777	DOWN
Vun_Novel_1	GCACUCAACUUUCAUGACAAGUG	271.893	9.79796	0.036036	-4.79442	0.515066	0.897573	DOWN
	miRNA	DL Expression	DR Expression	FoldChange	log2FoldChange	P Value	Adjusted P Value	Regulation
Vun_Novel_269	CUCAGAGGAAACAACACUUGUAC	10.403	27.8765	2.67965	1.42204	0.922121	1	UP
Vun_Novel_22	GCACGUGCUCUCCUUUUCCAGU	126.989	47.39	0.373183	-1.42204	1	1	DOWN

## Sheet: targets
Table S5g. Targets of selected DE in leaf and root sRNA libraries of cowpea. GO and Pathway IDs are provided for the targets.
miRNA	Target_ID	Expectation	UPE	miRNA_Start	miRNA_End	Target_Start	Target_End	miRNA_aligned_fragment	Target_aligned_fragment	Inhibition	Target_Description	Multiplicity	Uniprot_Protein_name	Gene_Name	Pathway	GO_MF	GO_BP	GO_CC
vun-miR1514a-3p	XM_028046479.1	3.5	-1	1	21	263	283	AUGCCUAUUUUAAAAUGAAAA	AUUUUUUCUUGAAAUAGGUAU	Cleavage	PREDICTED: Vigna unguiculata serine carboxypeptidase-like 11 (LOC114162554), transcript variant X3, mRNA	1	Uncharacterized protein	DEO72_LG11g1491	Peptidases and inhibitors [01002]	NA	NA	NA
vun-miR1514a-3p	XM_028046480.1	3.5	-1	1	21	220	240	AUGCCUAUUUUAAAAUGAAAA	AUUUUUUCUUGAAAUAGGUAU	Cleavage	PREDICTED: Vigna unguiculata serine carboxypeptidase-like 11 (LOC114162554), transcript variant X4, mRNA	1	Uncharacterized protein	DEO72_LG11g1491	Peptidases and inhibitors [01002]	NA	NA	NA
vun-miR1514a-3p	XM_028046481.1	3.5	-1	1	21	263	283	AUGCCUAUUUUAAAAUGAAAA	AUUUUUUCUUGAAAUAGGUAU	Cleavage	PREDICTED: Vigna unguiculata serine carboxypeptidase-like 11 (LOC114162554), transcript variant X10, mRNA	1	Uncharacterized protein	DEO72_LG11g1491	Peptidases and inhibitors [01002]	NA	NA	NA
vun-miR1514a-3p	XM_028046635.1	4	-1	1	21	1099	1119	AUGCCUAUUUUAAAAUGAAAA	UAUUCAUUUGGGAAUAAGCAU	Cleavage	PREDICTED: Vigna unguiculata probable polygalacturonase (LOC114162678), mRNA	1	Galacturan 1	DEO72_LG6g2974	NA	GO:0004650~polygalacturonase activity	GO:0005975~carbohydrate metabolic process;GO:0071555~cell wall organization	GO:0005576~extracellular region
vun-miR1514a-3p	XM_028047054.1	4	-1	1	21	1672	1692	AUGCCUAUUUUAAAAUGAAAA	UGUUCAUUUUGAGUGAGGCAU	Cleavage	PREDICTED: Vigna unguiculata uncharacterized LOC114163010 (LOC114163010), mRNA	1	Uncharacterized protein	DEO72_LG11g3033	NA	NA	NA	NA
vun-miR1514a-3p	XM_028047129.1	4.5	-1	1	21	5510	5530	AUGCCUAUUUUAAAAUGAAAA	UUUGCAUUUUAGAUUAGGGAU	Cleavage	PREDICTED: Vigna unguiculata 187-kDa microtubule-associated protein AIR9 (LOC114163068), transcript variant X1, mRNA	1	Periodic tryptophan protein 2	DEO72_LG11g664	NA	NA	NA	NA
vun-miR1514a-3p	XM_028047131.1	4.5	-1	1	21	5478	5498	AUGCCUAUUUUAAAAUGAAAA	UUUGCAUUUUAGAUUAGGGAU	Cleavage	PREDICTED: Vigna unguiculata 187-kDa microtubule-associated protein AIR9 (LOC114163068), transcript variant X2, mRNA	1	Periodic tryptophan protein 2	DEO72_LG11g664	NA	NA	NA	NA
vun-miR1514a-3p	XM_028047487.1	3.5	-1	1	21	1421	1441	AUGCCUAUUUUAAAAUGAAAA	GGGUUAUUUUAAAGCAGGCAU	Cleavage	PREDICTED: Vigna unguiculata pentatricopeptide repeat-containing protein At4g20090 (LOC114163273), mRNA	1	Structure-specific endonuclease subunit SLX1	DEO72_LG11g204	NA	GO:0004519~endonuclease activity	NA	NA
vun-miR1514a-3p	XM_028047892.1	4	-1	1	21	13	33	AUGCCUAUUUUAAAAUGAAAA	UUUGAGUUUUGGAAUGGGCAU	Cleavage	PREDICTED: Vigna unguiculata putative pentatricopeptide repeat-containing protein At5g08490 (LOC114163587), mRNA	1	Structure-specific endonuclease subunit SLX1	DEO72_LG11g2031	NA	GO:0004519~endonuclease activity	NA	NA
vun-miR1514a-3p	XM_028049418.1	3.5	-1	1	21	2289	2309	AUGCCUAUUUUAAAAUGAAAA	UUUUCAUUUAAAAGUAGGCUU	Cleavage	PREDICTED: Vigna unguiculata uncharacterized LOC114164678 (LOC114164678), transcript variant X1, mRNA	1	E3 ubiquitin-protein ligase CHFR	DEO72_LG11g1318	NA	NA	NA	NA
vun-miR1514a-3p	XM_028049419.1	3.5	-1	1	21	2283	2303	AUGCCUAUUUUAAAAUGAAAA	UUUUCAUUUAAAAGUAGGCUU	Cleavage	PREDICTED: Vigna unguiculata uncharacterized LOC114164678 (LOC114164678), transcript variant X2, mRNA	1	E3 ubiquitin-protein ligase CHFR	DEO72_LG11g1318	NA	NA	NA	NA
vun-miR1514a-3p	XM_028049420.1	3.5	-1	1	21	2274	2294	AUGCCUAUUUUAAAAUGAAAA	UUUUCAUUUAAAAGUAGGCUU	Cleavage	PREDICTED: Vigna unguiculata uncharacterized LOC114164678 (LOC114164678), transcript variant X3, mRNA	1	E3 ubiquitin-protein ligase CHFR	DEO72_LG11g1318	NA	NA	NA	NA
vun-miR1514a-3p	XM_028049422.1	3.5	-1	1	21	2268	2288	AUGCCUAUUUUAAAAUGAAAA	UUUUCAUUUAAAAGUAGGCUU	Cleavage	PREDICTED: Vigna unguiculata uncharacterized LOC114164678 (LOC114164678), transcript variant X4, mRNA	1	E3 ubiquitin-protein ligase CHFR	DEO72_LG11g1318	NA	NA	NA	NA
vun-miR1514a-3p	XM_028049423.1	3.5	-1	1	21	2205	2225	AUGCCUAUUUUAAAAUGAAAA	UUUUCAUUUAAAAGUAGGCUU	Cleavage	PREDICTED: Vigna unguiculata uncharacterized LOC114164678 (LOC114164678), transcript variant X5, mRNA	1	E3 ubiquitin-protein ligase CHFR	DEO72_LG11g1318	NA	NA	NA	NA
vun-miR1514a-3p	XM_028049424.1	3.5	-1	1	21	2190	2210	AUGCCUAUUUUAAAAUGAAAA	UUUUCAUUUAAAAGUAGGCUU	Cleavage	PREDICTED: Vigna unguiculata uncharacterized LOC114164678 (LOC114164678), transcript variant X6, mRNA	1	E3 ubiquitin-protein ligase CHFR	DEO72_LG11g1318	NA	NA	NA	NA
vun-miR1514a-3p	XM_028049425.1	3.5	-1	1	21	1778	1798	AUGCCUAUUUUAAAAUGAAAA	UUUUCAUUUAAAAGUAGGCUU	Cleavage	PREDICTED: Vigna unguiculata uncharacterized LOC114164678 (LOC114164678), transcript variant X7, mRNA	1	E3 ubiquitin-protein ligase CHFR	DEO72_LG11g1318	NA	NA	NA	NA
vun-miR1514a-3p	XM_028051194.1	4.5	-1	1	21	507	527	AUGCCUAUUUUAAAAUGAAAA	UUUUCCUUUUUAACUGGGCAU	Translation	PREDICTED: Vigna unguiculata receptor-like protein 7 (LOC114166457), mRNA	1	LRR receptor-like serine/threonine-protein kinase FLS2	DEO72_LG8g1372	NA	GO:0016301~kinase activity	NA	NA
vun-miR1514a-3p	XM_028051533.1	4.5	-1	1	21	485	505	AUGCCUAUUUUAAAAUGAAAA	UUUUCCUUUUCAAAUGGGUAG	Translation	PREDICTED: Vigna unguiculata uncharacterized protein At1g51745-like (LOC114166744), mRNA	1	PWWP domain-containing protein	DEO72_LG8g295	NA	NA	NA	NA
vun-miR1514a-3p	XM_028052172.1	3.5	-1	1	21	453	473	AUGCCUAUUUUAAAAUGAAAA	GUUUCAUAAUAAAGUGGGCAU	Cleavage	PREDICTED: Vigna unguiculata metallothionein-like protein 2 (LOC114167179), mRNA	1	Metallothionein	DEO72_LG8g2214	NA	GO:0046872~metal ion binding	NA	NA
vun-miR1514a-3p	XM_028052220.1	3.5	-1	1	21	2791	2811	AUGCCUAUUUUAAAAUGAAAA	CAUUCAUUUUAGGGUAUGUAU	Cleavage	PREDICTED: Vigna unguiculata uncharacterized LOC114167213 (LOC114167213), mRNA	1	Uncharacterized protein	DEO72_LG8g735	NA	NA	NA	GO:0016021~integral component of membrane
vun-miR1514a-3p	XM_028052395.1	5	-1	1	21	1396	1416	AUGCCUAUUUUAAAAUGAAAA	UUUUUUUUUUGAAGUAGUUGU	Cleavage	PREDICTED: Vigna unguiculata glycinol 4-dimethylallyltransferase-like (LOC114167335), mRNA	1	Homogenitisate phytyltransferase	DEO72_LG8g2324	Prenyltransferases [01006]; Ubiquinone and other terpenoid-quinone biosynthesis [00130]	GO:0016765~transferase activity, transferring alkyl or aryl (other than methyl) groups	NA	GO:0016021~integral component of membrane
vun-miR1514a-3p	XM_028053025.1	4	-1	1	21	17	37	AUGCCUAUUUUAAAAUGAAAA	UUCUCAUAUUAAAAUAGUUAU	Cleavage	PREDICTED: Vigna unguiculata MDIS1-interacting receptor like kinase 2-like (LOC114168273), mRNA	1	Serine/threonine kinase	DEO72_LG3g3545	NA	GO:0004672~protein kinase activity;GO:0005524~ATP binding	NA	GO:0016021~integral component of membrane
vun-miR1514a-3p	XM_028053363.1	5	-1	1	21	920	940	AUGCCUAUUUUAAAAUGAAAA	UUUUUCUUUUCAAAUGGGUAC	Translation	PREDICTED: Vigna unguiculata dehydration-responsive element-binding protein 2F-like (LOC114168235), mRNA	1	EREBP-like factor	DEO72_LG6g2161	NA	GO:0003677~DNA binding;GO:0003700~sequence-specific DNA binding transcription factor activity	NA	GO:0005634~nucleus
vun-miR1514a-3p	XM_028053984.1	4.5	-1	1	21	2529	2549	AUGCCUAUUUUAAAAUGAAAA	CUUUCAUUUUAAGAUUUGUGU	Cleavage	PREDICTED: Vigna unguiculata F-box/FBD/LRR-repeat protein At4g26340-like (LOC114168979), mRNA	1	F-box domain-containing protein	DEO72_LG5g3292	NA	NA	NA	NA
vun-miR1514a-3p	XM_028054189.1	3.5	-1	1	21	643	663	AUGCCUAUUUUAAAAUGAAAA	AUCUGAUUUUGAAAUGGGUAU	Cleavage	PREDICTED: Vigna unguiculata probable serine/threonine-protein kinase At1g54610 (LOC114169150), mRNA	1	Uncharacterized protein (Fragment)	NYM_LOCUS3075	NA	NA	NA	NA
vun-miR1514a-3p	XM_028055450.1	4	-1	1	21	1539	1559	AUGCCUAUUUUAAAAUGAAAA	UUUUUAUUUUACAGUAAGCAU	Translation	PREDICTED: Vigna unguiculata dolichyl-diphosphooligosaccharide--protein glycosyltransferase 48 kDa subunit (LOC114169999), mRNA	1	Dolichyl-diphosphooligosaccharide--protein glycosyltransferase 48 kDa subunit (Oligosaccharyl transferase 48 kDa subunit)	LR48_Vigan08g170000	PATHWAY: Protein modification; protein glycosylation. {ECO:0000256|RuleBase:RU361142}.; Various types of N-glycan biosynthesis [00513]; N-Glycan biosynthesis [00510]; Protein processing in endoplasmic reticulum [04141]	NA	GO:0018279~protein N-linked glycosylation via asparagine	GO:0005789~endoplasmic reticulum membrane;GO:0016021~integral component of membrane
vun-miR1514a-3p	XM_028055676.1	4	-1	1	21	1278	1298	AUGCCUAUUUUAAAAUGAAAA	AUGUCAUUUUUGGGUAGGCAU	Translation	PREDICTED: Vigna unguiculata protein FAR1-RELATED SEQUENCE 5-like (LOC114170192), mRNA	1	protein FAR-RED IMPAIRED RESPONSE 1-like	LOC106773268	NA	GO:0008270~zinc ion binding	GO:0006355~regulation of transcription, DNA-templated	NA
vun-miR1514a-3p	XM_028055760.1	4.5	-1	1	21	4181	4201	AUGCCUAUUUUAAAAUGAAAA	UUUACAUUGUAAAGUUGGCAU	Cleavage	PREDICTED: Vigna unguiculata uncharacterized LOC114170278 (LOC114170278), transcript variant X1, mRNA	1	Serine/threonine-protein kinase CTR1	DEO72_LG3g462	NA	GO:0004672~protein kinase activity;GO:0005524~ATP binding	NA	NA
vun-miR1514a-3p	XM_028055762.1	4.5	-1	1	21	3993	4013	AUGCCUAUUUUAAAAUGAAAA	UUUACAUUGUAAAGUUGGCAU	Cleavage	PREDICTED: Vigna unguiculata uncharacterized LOC114170278 (LOC114170278), transcript variant X2, mRNA	1	Serine/threonine-protein kinase CTR1	DEO72_LG3g462	NA	GO:0004672~protein kinase activity;GO:0005524~ATP binding	NA	NA
vun-miR1514a-3p	XM_028056313.1	5	-1	1	21	465	485	AUGCCUAUUUUAAAAUGAAAA	GGGUGAAUUUGAAAUAGCCAU	Cleavage	PREDICTED: Vigna unguiculata transcription initiation factor TFIID subunit 14b-like (LOC114170853), mRNA	1	Transcription initiation factor TFIID subunit 14b	TAF14B CR513_51996	Chromosome and associated proteins [03036]	GO:0003743~translation initiation factor activity	GO:0006355~regulation of transcription, DNA-templated	GO:0005634~nucleus
vun-miR1514a-3p	XM_028057531.1	3.5	-1	1	21	1740	1760	AUGCCUAUUUUAAAAUGAAAA	AUUUUAUAUUAAAAUAUGUAU	Cleavage	PREDICTED: Vigna unguiculata probable WRKY transcription factor 72 (LOC114173257), mRNA	1	WRKY transcription factor 33	DEO72_LG4g1439	NA	GO:0003700~sequence-specific DNA binding transcription factor activity;GO:0043565~sequence-specific DNA binding	NA	GO:0005634~nucleus
vun-miR1514a-3p	XM_028058488.1	4	-1	1	21	2091	2111	AUGCCUAUUUUAAAAUGAAAA	UUUUCCUAUUAAAGUAGGGAU	Cleavage	PREDICTED: Vigna unguiculata ERAD-associated E3 ubiquitin-protein ligase HRD1B (LOC114173840), transcript variant X1, mRNA	1	E3 ubiquitin-protein ligase synoviolin	DEO72_LG4g2760	Ubiquitin system [04121]; Ubiquitin mediated proteolysis [04120]; Protein processing in endoplasmic reticulum [04141]	NA	NA	GO:0016021~integral component of membrane
vun-miR1514a-3p	XM_028058489.1	4	-1	1	21	2081	2101	AUGCCUAUUUUAAAAUGAAAA	UUUUCCUAUUAAAGUAGGGAU	Cleavage	PREDICTED: Vigna unguiculata ERAD-associated E3 ubiquitin-protein ligase HRD1B (LOC114173840), transcript variant X2, mRNA	1	E3 ubiquitin-protein ligase synoviolin	DEO72_LG4g2760	Ubiquitin system [04121]; Ubiquitin mediated proteolysis [04120]; Protein processing in endoplasmic reticulum [04141]	NA	NA	GO:0016021~integral component of membrane
vun-miR1514a-3p	XM_028058510.1	5	-1	1	21	1462	1482	AUGCCUAUUUUAAAAUGAAAA	UUUUUCUUUAAGAAAAGGCAU	Cleavage	PREDICTED: Vigna unguiculata protein EARLY-RESPONSIVE TO DEHYDRATION 7, chloroplastic-like (LOC114173859), mRNA	1	Senescence domain-containing protein	LR48_Vigan499s002400	Endocytosis [04144]	NA	NA	NA
vun-miR1514a-3p	XM_028060251.1	3.5	-1	1	21	743	763	AUGCCUAUUUUAAAAUGAAAA	GAUUCAUUUUGGGAUAGGUUU	Cleavage	PREDICTED: Vigna unguiculata protein ZINC INDUCED FACILITATOR 1-like (LOC114175493), transcript variant X1, mRNA	1	MFS transporter	DEO72_LG6g163	NA	NA	GO:0055085~transmembrane transport	GO:0016021~integral component of membrane
vun-miR1514a-3p	XM_028060256.1	3.5	-1	1	21	757	777	AUGCCUAUUUUAAAAUGAAAA	GAUUCAUUUUGGGAUAGGUUU	Cleavage	PREDICTED: Vigna unguiculata protein ZINC INDUCED FACILITATOR 1-like (LOC114175493), transcript variant X2, mRNA	1	MFS transporter	DEO72_LG6g163	NA	NA	GO:0055085~transmembrane transport	GO:0016021~integral component of membrane
vun-miR1514a-3p	XM_028060261.1	3.5	-1	1	21	689	709	AUGCCUAUUUUAAAAUGAAAA	GAUUCAUUUUGGGAUAGGUUU	Cleavage	PREDICTED: Vigna unguiculata protein ZINC INDUCED FACILITATOR 1-like (LOC114175493), transcript variant X3, mRNA	1	MFS transporter	DEO72_LG6g163	NA	NA	GO:0055085~transmembrane transport	GO:0016021~integral component of membrane
vun-miR1514a-3p	XM_028060798.1	4.5	-1	1	21	2575	2595	AUGCCUAUUUUAAAAUGAAAA	UUUUUUUUUUGAGGUAGCCAU	Cleavage	PREDICTED: Vigna unguiculata DEAD-box ATP-dependent RNA helicase 21 (LOC114175945), transcript variant X1, mRNA	1	ATP-dependent RNA helicase DDX23/PRP28	DEO72_LG2g151	Spliceosome [03041]; Spliceosome [03040]	GO:0003676~nucleic acid binding;GO:0004386~helicase activity;GO:0005524~ATP binding	NA	NA
vun-miR1514a-3p	XM_028060799.1	4.5	-1	1	21	2575	2595	AUGCCUAUUUUAAAAUGAAAA	UUUUUUUUUUGAGGUAGCCAU	Cleavage	PREDICTED: Vigna unguiculata DEAD-box ATP-dependent RNA helicase 21 (LOC114175945), transcript variant X2, mRNA	1	ATP-dependent RNA helicase DDX23/PRP28	DEO72_LG2g151	Spliceosome [03041]; Spliceosome [03040]	GO:0003676~nucleic acid binding;GO:0004386~helicase activity;GO:0005524~ATP binding	NA	NA
vun-miR1514a-3p	XM_028060801.1	4.5	-1	1	21	2575	2595	AUGCCUAUUUUAAAAUGAAAA	UUUUUUUUUUGAGGUAGCCAU	Cleavage	PREDICTED: Vigna unguiculata DEAD-box ATP-dependent RNA helicase 21 (LOC114175945), transcript variant X3, mRNA	1	ATP-dependent RNA helicase DDX23/PRP28	DEO72_LG2g151	Spliceosome [03041]; Spliceosome [03040]	GO:0003676~nucleic acid binding;GO:0004386~helicase activity;GO:0005524~ATP binding	NA	NA
vun-miR1514a-3p	XM_028060802.1	4.5	-1	1	21	2574	2594	AUGCCUAUUUUAAAAUGAAAA	UUUUUUUUUUGAGGUAGCCAU	Cleavage	PREDICTED: Vigna unguiculata DEAD-box ATP-dependent RNA helicase 21 (LOC114175945), transcript variant X4, mRNA	1	ATP-dependent RNA helicase DDX23/PRP28	DEO72_LG2g151	Spliceosome [03041]; Spliceosome [03040]	GO:0003676~nucleic acid binding;GO:0004386~helicase activity;GO:0005524~ATP binding	NA	NA
vun-miR1514a-3p	XM_028061153.1	5	-1	1	21	3143	3162	AUGCCUAUUUUAAAAUGAAAA	UUUUCAUUUAAAAAU-GGUAU	Cleavage	PREDICTED: Vigna unguiculata uncharacterized LOC114176197 (LOC114176197), mRNA	1	Uncharacterized protein	DEO72_LG2g355	NA	NA	NA	NA
vun-miR1514a-3p	XM_028062273.1	4	-1	1	21	1867	1887	AUGCCUAUUUUAAAAUGAAAA	CCAUCAUUUUAAAGAAGGCAC	Cleavage	PREDICTED: Vigna unguiculata pentatricopeptide repeat-containing protein At5g06540 (LOC114177042), mRNA	1	Structure-specific endonuclease subunit SLX1	DEO72_LG6g2863	NA	GO:0004519~endonuclease activity;GO:0008270~zinc ion binding	NA	NA
vun-miR1514a-3p	XM_028063228.1	3	-1	1	21	2153	2174	AUGCCUAUUUU-AAAAUGAAAA	UUUUCAUUUUUAAAAUAGGCAU	Translation	PREDICTED: Vigna unguiculata AP-5 complex subunit mu (LOC114177732), transcript variant X3, mRNA	1	AP-3 complex subunit mu	DEO72_LG2g229	DNA repair and recombination proteins [03400]	NA	GO:0015031~protein transport	GO:0016020~membrane
vun-miR1514a-3p	XM_028065362.1	5	-1	1	21	363	383	AUGCCUAUUUUAAAAUGAAAA	UUUAUGUUUAAGAAUAGGUGU	Cleavage	PREDICTED: Vigna unguiculata iron-sulfur assembly protein IscA, chloroplastic (LOC114179135), mRNA	1	Fe-S_biosyn domain-containing protein	NA	Mitochondrial biogenesis [03029]	NA	NA	NA
vun-miR1514a-3p	XM_028065747.1	4.5	-1	1	21	413	433	AUGCCUAUUUUAAAAUGAAAA	GUUUCAUUUUAACGUAGUUGU	Cleavage	PREDICTED: Vigna unguiculata VQ motif-containing protein 31-like (LOC114179411), transcript variant X1, mRNA	1	VQ domain-containing protein	DEO72_LG2g5281	NA	NA	NA	NA
vun-miR1514a-3p	XM_028065805.1	4	-1	1	21	18	38	AUGCCUAUUUUAAAAUGAAAA	AUUUUAUUUUAAAAAGGGUAA	Cleavage	PREDICTED: Vigna unguiculata pentatricopeptide repeat-containing protein At3g29230-like (LOC114179459), transcript variant X1, mRNA	1	Structure-specific endonuclease subunit SLX1	DEO72_LG2g1797	NA	GO:0004519~endonuclease activity	NA	NA
vun-miR1514a-3p	XM_028065807.1	4	-1	1	21	18	38	AUGCCUAUUUUAAAAUGAAAA	AUUUUAUUUUAAAAAGGGUAA	Cleavage	PREDICTED: Vigna unguiculata pentatricopeptide repeat-containing protein At3g29230-like (LOC114179459), transcript variant X2, mRNA	1	Structure-specific endonuclease subunit SLX1	DEO72_LG2g1797	NA	GO:0004519~endonuclease activity	NA	NA
vun-miR1514a-3p	XM_028066499.1	3	-1	1	21	1831	1851	AUGCCUAUUUUAAAAUGAAAA	AUUUUGUUUUAAAAUAGGUUU	Cleavage	PREDICTED: Vigna unguiculata uncharacterized LOC114180031 (LOC114180031), mRNA	1	Uncharacterized protein	DEO72_LG7g1065	NA	NA	NA	NA
vun-miR1514a-3p	XM_028069896.1	4.5	-1	1	21	7672	7693	AUGCCUAUUUUAAA-AUGAAAA	UUUUCAUGUUUAAAAUAUGCAA	Cleavage	PREDICTED: Vigna unguiculata uncharacterized LOC114183055 (LOC114183055), mRNA	1	uncharacterized protein LOC106758543 isoform X2	LOC106758543	NA	GO:0043531~ADP binding	NA	NA
vun-miR1514a-3p	XM_028069907.1	5	-1	1	21	1819	1839	AUGCCUAUUUUAAAAUGAAAA	UUUUAAUUUUAAAAUAAACAC	Cleavage	PREDICTED: Vigna unguiculata serine/threonine-protein kinase rio1-like (LOC114183058), mRNA	1	Serine/threonine-protein kinase RIO1 (EC 2.7.11.1)	TSUD_313380	Ribosome biogenesis [03009]; Ribosome biogenesis in eukaryotes [03008]; Protein kinases [01001]	GO:0004674~protein serine/threonine kinase activity;GO:0005524~ATP binding	NA	NA
vun-miR1514a-3p	XM_028070598.1	4.5	-1	1	21	981	1001	AUGCCUAUUUUAAAAUGAAAA	UUUUUAUUUUGUAAUAUGUAU	Translation	PREDICTED: Vigna unguiculata protein NDR1-like (LOC114183543), mRNA	1	Uncharacterized protein	DEO72_LG10g1034	NA	NA	NA	GO:0016021~integral component of membrane
vun-miR1514a-3p	XM_028070647.1	5	-1	1	21	683	704	AUGCCUAU-UUUAAAAUGAAAA	GUUUCAUUUUGGAUAUGGGCGU	Cleavage	PREDICTED: Vigna unguiculata glucose--fructose oxidoreductase-like (LOC114183576), transcript variant X1, mRNA	1	DNA topoisomerase 6 subunit B (EC 5.6.2.2)	TOP6B DEO72_LG10g368	NA	GO:0003677~DNA binding;GO:0003918~DNA topoisomerase type II (ATP-hydrolyzing) activity;GO:0005524~ATP binding;GO:0016491~oxidoreductase activity	GO:0006265~DNA topological change	GO:0005634~nucleus;GO:0009330~DNA topoisomerase complex (ATP-hydrolyzing)
vun-miR1514a-3p	XM_028070649.1	5	-1	1	21	683	704	AUGCCUAU-UUUAAAAUGAAAA	GUUUCAUUUUGGAUAUGGGCGU	Cleavage	PREDICTED: Vigna unguiculata glucose--fructose oxidoreductase-like (LOC114183576), transcript variant X2, mRNA	1	DNA topoisomerase 6 subunit B (EC 5.6.2.2)	TOP6B DEO72_LG10g368	NA	GO:0003677~DNA binding;GO:0003918~DNA topoisomerase type II (ATP-hydrolyzing) activity;GO:0005524~ATP binding;GO:0016491~oxidoreductase activity	GO:0006265~DNA topological change	GO:0005634~nucleus;GO:0009330~DNA topoisomerase complex (ATP-hydrolyzing)
vun-miR1514a-3p	XM_028071336.1	4.5	-1	1	21	902	922	AUGCCUAUUUUAAAAUGAAAA	UUUUUAUUUUGUAAUAUGUAU	Translation	PREDICTED: Vigna unguiculata protein NDR1-like (LOC114184097), mRNA	1	Uncharacterized protein	DEO72_LG10g1034	NA	NA	NA	GO:0016021~integral component of membrane
vun-miR1514a-3p	XM_028071626.1	5	-1	1	21	429	449	AUGCCUAUUUUAAAAUGAAAA	UUUUCCUUAUGCAGUAGGCAU	Translation	PREDICTED: Vigna unguiculata metallothionein-like protein 4A (LOC114184317), mRNA	1	Plant EC metallothionein-like protein	DEO72_LG10g2675	NA	GO:0008270~zinc ion binding	NA	NA
vun-miR1514a-3p	XM_028072377.1	4	-1	1	21	2372	2392	AUGCCUAUUUUAAAAUGAAAA	GUUUAAUUUUAAAAUGUGUGU	Cleavage	PREDICTED: Vigna unguiculata WEB family protein At4g27595, chloroplastic (LOC114184953), mRNA	1	Uncharacterized protein	DEO72_LG10g3368	NA	NA	NA	NA
vun-miR1514a-3p	XM_028073998.1	4	-1	1	21	3180	3200	AUGCCUAUUUUAAAAUGAAAA	CUUUUUUUUUAACAUGGGUAU	Cleavage	PREDICTED: Vigna unguiculata pentatricopeptide repeat-containing protein At3g18970 (LOC114186007), transcript variant X1, mRNA	1	Uncharacterized protein	Vigan.07G079500 VIGAN_07079500	NA	NA	NA	NA
vun-miR1514a-3p	XM_028073999.1	4	-1	1	21	3999	4019	AUGCCUAUUUUAAAAUGAAAA	CUUUUUUUUUAACAUGGGUAU	Cleavage	PREDICTED: Vigna unguiculata pentatricopeptide repeat-containing protein At3g18970 (LOC114186007), transcript variant X2, mRNA	1	Uncharacterized protein	Vigan.07G079500 VIGAN_07079500	NA	NA	NA	NA
vun-miR1514a-3p	XM_028074223.1	4	-1	1	21	1896	1916	AUGCCUAUUUUAAAAUGAAAA	UUGUUGUUUUAAAGUUGGCAU	Cleavage	PREDICTED: Vigna unguiculata F-box protein At4g02760-like (LOC114186183), transcript variant X1, mRNA	1	F-box and leucine-rich repeat protein 2/20	DEO72_LG6g2331	Ubiquitin system [04121]	NA	NA	NA
vun-miR1514a-3p	XM_028074231.1	4	-1	1	21	1902	1922	AUGCCUAUUUUAAAAUGAAAA	UUGUUGUUUUAAAGUUGGCAU	Cleavage	PREDICTED: Vigna unguiculata F-box protein At4g02760-like (LOC114186183), transcript variant X2, mRNA	1	F-box and leucine-rich repeat protein 2/20	DEO72_LG6g2331	Ubiquitin system [04121]	NA	NA	NA
vun-miR1514a-3p	XM_028074238.1	4	-1	1	21	1951	1971	AUGCCUAUUUUAAAAUGAAAA	UUGUUGUUUUAAAGUUGGCAU	Cleavage	PREDICTED: Vigna unguiculata F-box protein At4g02760-like (LOC114186183), transcript variant X3, mRNA	1	F-box and leucine-rich repeat protein 2/20	DEO72_LG6g2331	Ubiquitin system [04121]	NA	NA	NA
vun-miR1514a-3p	XM_028074978.1	4.5	-1	1	21	1207	1227	AUGCCUAUUUUAAAAUGAAAA	UUUUGGUUUUGAAAUGGCUAU	Cleavage	PREDICTED: Vigna unguiculata deubiquitinase OTUD6B (LOC114186904), transcript variant X1, mRNA	1	Nuclear protein localization protein 4-like protein	DEO72_LG6g2908	Ubiquitin system [04121]	NA	NA	NA
vun-miR1514a-3p	XM_028074987.1	4.5	-1	1	21	1551	1571	AUGCCUAUUUUAAAAUGAAAA	UUUUGGUUUUGAAAUGGCUAU	Cleavage	PREDICTED: Vigna unguiculata deubiquitinase OTUD6B (LOC114186904), transcript variant X2, mRNA	1	Nuclear protein localization protein 4-like protein	DEO72_LG6g2908	Ubiquitin system [04121]	NA	NA	NA
vun-miR1514a-3p	XM_028075051.1	4	-1	1	21	1267	1287	AUGCCUAUUUUAAAAUGAAAA	UUUUAAUUUUGAAACAGGCAC	Cleavage	PREDICTED: Vigna unguiculata protein SIEVE ELEMENT OCCLUSION B-like (LOC114186964), mRNA	1	Sieve element occlusion	DEO72_LG1g2465	NA	NA	GO:0010088~phloem development	NA
vun-miR1514a-3p	XM_028075469.1	4	-1	1	21	1728	1748	AUGCCUAUUUUAAAAUGAAAA	UUUGCAAUUUGAAAUGGGCAC	Cleavage	PREDICTED: Vigna unguiculata beclin-1-like protein (LOC114187265), transcript variant X1, mRNA	1	Beclin 1	DEO72_LG6g408	Membrane trafficking [04131]; Mitochondrial biogenesis [03029]; Autophagy - other [04136]	NA	GO:0006914~autophagy	NA
vun-miR1514a-3p	XM_028075477.1	4	-1	1	21	1709	1729	AUGCCUAUUUUAAAAUGAAAA	UUUGCAAUUUGAAAUGGGCAC	Cleavage	PREDICTED: Vigna unguiculata beclin-1-like protein (LOC114187265), transcript variant X2, mRNA	1	Beclin 1	DEO72_LG6g408	Membrane trafficking [04131]; Mitochondrial biogenesis [03029]; Autophagy - other [04136]	NA	GO:0006914~autophagy	NA
vun-miR1514a-3p	XM_028075857.1	3	-1	1	21	737	757	AUGCCUAUUUUAAAAUGAAAA	AUAUCUUUUUGAAAUAGGUAU	Cleavage	PREDICTED: Vigna unguiculata squamosa promoter-binding protein 1-like (LOC114187579), mRNA	1	Squamosa promoter-binding-like protein	LOC106775516	NA	GO:0003677~DNA binding;GO:0003700~sequence-specific DNA binding transcription factor activity;GO:0046872~metal ion binding	GO:0009908~flower development	GO:0005634~nucleus
vun-miR1514a-3p	XM_028076371.1	5	-1	1	21	2064	2085	AUGCCUAUUUUAAAA-UGAAAA	UUUUCACUUUUGAGAUAGGUGG	Cleavage	PREDICTED: Vigna unguiculata uncharacterized LOC114187939 (LOC114187939), mRNA	1	uncharacterized protein LOC111241703	LOC111241703	NA	NA	NA	NA
vun-miR1514a-3p	XM_028076633.1	4	-1	1	21	2807	2827	AUGCCUAUUUUAAAAUGAAAA	AUUCUGUUUUUAAGUAGGCAU	Translation	PREDICTED: Vigna unguiculata protein FAR1-RELATED SEQUENCE 7-like (LOC114188108), transcript variant X1, mRNA	1	uncharacterized protein LOC111242705	LOC111242705	NA	GO:0008270~zinc ion binding	GO:0006355~regulation of transcription, DNA-templated	NA
vun-miR1514a-3p	XM_028076634.1	4	-1	1	21	2928	2948	AUGCCUAUUUUAAAAUGAAAA	AUUCUGUUUUUAAGUAGGCAU	Translation	PREDICTED: Vigna unguiculata protein FAR1-RELATED SEQUENCE 7-like (LOC114188108), transcript variant X2, mRNA	1	uncharacterized protein LOC111242705	LOC111242705	NA	GO:0008270~zinc ion binding	GO:0006355~regulation of transcription, DNA-templated	NA
vun-miR1514a-3p	XM_028076644.1	4	-1	1	21	958	978	AUGCCUAUUUUAAAAUGAAAA	UUUUCGGUUUGAAUUAGGCGU	Cleavage	PREDICTED: Vigna unguiculata stem-specific protein TSJT1-like (LOC114188115), mRNA	1	Nucleophile aminohydrolase	DEO72_LG1g360	NA	GO:0016787~hydrolase activity	NA	NA
vun-miR1514a-3p	XM_028076885.1	4.5	-1	1	21	3616	3636	AUGCCUAUUUUAAAAUGAAAA	UUUUCAUUUUAAAAUGUACAA	Cleavage	PREDICTED: Vigna unguiculata uncharacterized LOC114188282 (LOC114188282), transcript variant X1, mRNA	1	DNA glycosylase	DEO72_LG1g2618	DNA repair and recombination proteins [03400]; Base excision repair [03410]; Chromosome and associated proteins [03036]	GO:0003824~catalytic activity	GO:0006284~base-excision repair	NA
vun-miR1514a-3p	XM_028076886.1	4.5	-1	1	21	3538	3558	AUGCCUAUUUUAAAAUGAAAA	UUUUCAUUUUAAAAUGUACAA	Cleavage	PREDICTED: Vigna unguiculata uncharacterized LOC114188282 (LOC114188282), transcript variant X2, mRNA	1	DNA glycosylase	DEO72_LG1g2618	DNA repair and recombination proteins [03400]; Base excision repair [03410]; Chromosome and associated proteins [03036]	GO:0003824~catalytic activity	GO:0006284~base-excision repair	NA
vun-miR1514a-3p	XM_028076943.1	3.5	-1	1	21	1255	1275	AUGCCUAUUUUAAAAUGAAAA	UUUUUCUUUUGAAACAGGCAU	Cleavage	PREDICTED: Vigna unguiculata protein SIEVE ELEMENT OCCLUSION B-like (LOC114188349), mRNA	2	Sieve element occlusion	DEO72_LG1g2465	NA	NA	GO:0010088~phloem development	NA
vun-miR1514a-3p	XM_028076943.1	4	-1	1	21	2521	2541	AUGCCUAUUUUAAAAUGAAAA	UUUCAAUUUUGAAACAGGCAU	Cleavage	PREDICTED: Vigna unguiculata protein SIEVE ELEMENT OCCLUSION B-like (LOC114188349), mRNA	2	Sieve element occlusion	DEO72_LG1g2465	NA	NA	GO:0010088~phloem development	NA
vun-miR1514a-3p	XM_028077299.1	4.5	-1	1	21	2160	2180	AUGCCUAUUUUAAAAUGAAAA	UUUUCAUUUUAAAAUGUACAA	Cleavage	PREDICTED: Vigna unguiculata uncharacterized LOC114188699 (LOC114188699), mRNA	1	DNA glycosylase	DEO72_LG1g2618	DNA repair and recombination proteins [03400]; Base excision repair [03410]; Chromosome and associated proteins [03036]	GO:0003824~catalytic activity	GO:0006284~base-excision repair	NA
vun-miR1514a-3p	XM_028077351.1	4.5	-1	1	21	3613	3633	AUGCCUAUUUUAAAAUGAAAA	UUUUCAUUUUAAAAUGUACAA	Cleavage	PREDICTED: Vigna unguiculata uncharacterized LOC114188725 (LOC114188725), transcript variant X1, mRNA	1	DNA glycosylase	DEO72_LG1g2618	DNA repair and recombination proteins [03400]; Base excision repair [03410]; Chromosome and associated proteins [03036]	GO:0003824~catalytic activity	GO:0006284~base-excision repair	NA
vun-miR1514a-3p	XM_028077352.1	4.5	-1	1	21	3535	3555	AUGCCUAUUUUAAAAUGAAAA	UUUUCAUUUUAAAAUGUACAA	Cleavage	PREDICTED: Vigna unguiculata uncharacterized LOC114188725 (LOC114188725), transcript variant X2, mRNA	1	DNA glycosylase	DEO72_LG1g2618	DNA repair and recombination proteins [03400]; Base excision repair [03410]; Chromosome and associated proteins [03036]	GO:0003824~catalytic activity	GO:0006284~base-excision repair	NA
vun-miR1514a-3p	XM_028077359.1	5	-1	1	21	1387	1407	AUGCCUAUUUUAAAAUGAAAA	UUUGUGUUUUAUGAUAGGUGU	Translation	PREDICTED: Vigna unguiculata obg-like ATPase 1 (LOC114188730), mRNA	1	Obg-like ATPase 1	OsI_28170_2 CK203_056002	Chromosome and associated proteins [03036]	GO:0005525~GTP binding	NA	NA
vun-miR1514a-3p	XM_028078140.1	4	-1	1	21	1523	1543	AUGCCUAUUUUAAAAUGAAAA	UGUUUAUUUGGAGAUGGGUAU	Cleavage	PREDICTED: Vigna unguiculata flap endonuclease 1 (LOC114189546), transcript variant X3, mRNA	1	Uncharacterized protein	EJB05_36632	DNA repair and recombination proteins [03400]; Exosome [04147]; Non-homologous end-joining [03450]; DNA replication proteins [03032]; Base excision repair [03410]; DNA replication [03030]	NA	NA	NA
vun-miR1514a-3p	XM_028081127.1	2	-1	1	21	3005	3025	AUGCCUAUUUUAAAAUGAAAA	CGUUUCUUUUAAAAUAGGCGU	Cleavage	PREDICTED: Vigna unguiculata FT-interacting protein 3 (LOC114191753), transcript variant X1, mRNA	1	Phosphatidylserine decarboxylase	DEO72_LG9g212	NA	NA	NA	GO:0016021~integral component of membrane
vun-miR1514a-3p	XM_028081128.1	2	-1	1	21	3208	3228	AUGCCUAUUUUAAAAUGAAAA	CGUUUCUUUUAAAAUAGGCGU	Cleavage	PREDICTED: Vigna unguiculata FT-interacting protein 3 (LOC114191753), transcript variant X2, mRNA	1	Phosphatidylserine decarboxylase	DEO72_LG9g212	NA	NA	NA	GO:0016021~integral component of membrane
vun-miR1514a-3p	XM_028081330.1	3	-1	1	21	40	60	AUGCCUAUUUUAAAAUGAAAA	UUGUCAUUUUGAAAUAGGCCU	Cleavage	PREDICTED: Vigna unguiculata lipid phosphate phosphatase 2-like (LOC114191884), mRNA	1	acidPPc domain-containing protein	Vigan.08G035200 VIGAN_08035200	Glycerolipid metabolism [00561]; Glycerophospholipid metabolism [00564]	NA	NA	GO:0016021~integral component of membrane
vun-miR1514a-3p	XM_028081378.1	5	-1	1	21	2455	2475	AUGCCUAUUUUAAAAUGAAAA	UUUUGAUUUUGAGAUAGAUAG	Cleavage	PREDICTED: Vigna unguiculata protein ASPARTIC PROTEASE IN GUARD CELL 2-like (LOC114191924), mRNA	1	Aspartyl protease family protein	DEO72_LG9g3787	NA	GO:0004190~aspartic-type endopeptidase activity	NA	NA
vun-miR1514a-3p	XM_028082313.1	4	-1	1	21	571	591	AUGCCUAUUUUAAAAUGAAAA	AUUUAAUUUGAAAAUAGGUAG	Cleavage	PREDICTED: Vigna unguiculata uncharacterized LOC114192560 (LOC114192560), mRNA	1	Uncharacterized protein	DEO72_LG9g2293	NA	NA	NA	GO:0016021~integral component of membrane
vun-miR1514a-3p	XM_028082575.1	4	-1	1	21	656	676	AUGCCUAUUUUAAAAUGAAAA	GUUUGAUUUUGAAAUAGACAA	Cleavage	PREDICTED: Vigna unguiculata glycinol 4-dimethylallyltransferase-like (LOC114192765), transcript variant X1, mRNA	1	Homogenitisate phytyltransferase	DEO72_LG9g848	Prenyltransferases [01006]; Ubiquinone and other terpenoid-quinone biosynthesis [00130]	GO:0016765~transferase activity, transferring alkyl or aryl (other than methyl) groups	NA	GO:0016021~integral component of membrane
vun-miR1514a-3p	XM_028082577.1	4	-1	1	21	638	658	AUGCCUAUUUUAAAAUGAAAA	GUUUGAUUUUGAAAUAGACAA	Cleavage	PREDICTED: Vigna unguiculata glycinol 4-dimethylallyltransferase-like (LOC114192765), transcript variant X2, mRNA	1	Homogenitisate phytyltransferase	DEO72_LG9g848	Prenyltransferases [01006]; Ubiquinone and other terpenoid-quinone biosynthesis [00130]	GO:0016765~transferase activity, transferring alkyl or aryl (other than methyl) groups	NA	GO:0016021~integral component of membrane
vun-miR1514a-3p	XM_028084046.1	4	-1	1	21	3621	3641	AUGCCUAUUUUAAAAUGAAAA	UUUGUAUUUUGAGAUACGCAU	Cleavage	PREDICTED: Vigna unguiculata F-box/LRR-repeat protein 15-like (LOC114194016), mRNA	1	F-box and leucine-rich repeat protein 2/20	DEO72_LG7g442	NA	NA	NA	NA
vun-miR1514a-3p	XM_028084662.1	3	-1	1	21	1585	1605	AUGCCUAUUUUAAAAUGAAAA	AGUUCAUCUUCAAAUGGGCAU	Translation	PREDICTED: Vigna unguiculata protein HESO1 (LOC114194444), transcript variant X1, mRNA	3	Poly	DEO72_LG6g3244	NA	GO:0016779~nucleotidyltransferase activity	NA	NA
vun-miR1514a-3p	XM_028084662.1	4	-1	1	21	1654	1674	AUGCCUAUUUUAAAAUGAAAA	AUUGCAUCUUCAAAUGGGCAU	Translation	PREDICTED: Vigna unguiculata protein HESO1 (LOC114194444), transcript variant X1, mRNA	3	Poly	DEO72_LG6g3244	NA	GO:0016779~nucleotidyltransferase activity	NA	NA
vun-miR1514a-3p	XM_028084662.1	4.5	-1	1	21	1432	1452	AUGCCUAUUUUAAAAUGAAAA	AUUCCAUCUUCAAAUGGGUAU	Translation	PREDICTED: Vigna unguiculata protein HESO1 (LOC114194444), transcript variant X1, mRNA	3	Poly	DEO72_LG6g3244	NA	GO:0016779~nucleotidyltransferase activity	NA	NA
vun-miR1514a-3p	XM_028084671.1	3	-1	1	21	2357	2377	AUGCCUAUUUUAAAAUGAAAA	AGUUCAUCUUCAAAUGGGCAU	Translation	PREDICTED: Vigna unguiculata protein HESO1 (LOC114194444), transcript variant X2, mRNA	3	Poly	DEO72_LG6g3244	NA	GO:0016779~nucleotidyltransferase activity	NA	NA
vun-miR1514a-3p	XM_028084671.1	4	-1	1	21	2426	2446	AUGCCUAUUUUAAAAUGAAAA	AUUGCAUCUUCAAAUGGGCAU	Translation	PREDICTED: Vigna unguiculata protein HESO1 (LOC114194444), transcript variant X2, mRNA	3	Poly	DEO72_LG6g3244	NA	GO:0016779~nucleotidyltransferase activity	NA	NA
vun-miR1514a-3p	XM_028084671.1	4.5	-1	1	21	2204	2224	AUGCCUAUUUUAAAAUGAAAA	AUUCCAUCUUCAAAUGGGUAU	Translation	PREDICTED: Vigna unguiculata protein HESO1 (LOC114194444), transcript variant X2, mRNA	3	Poly	DEO72_LG6g3244	NA	GO:0016779~nucleotidyltransferase activity	NA	NA
vun-miR1514a-3p	XM_028084714.1	5	-1	1	21	87	107	AUGCCUAUUUUAAAAUGAAAA	UUUUCUUUUUAAAAAAGGAAG	Cleavage	PREDICTED: Vigna unguiculata phytoene synthase 2, chloroplastic (LOC114194468), transcript variant X3, mRNA	1	Phytoene synthase	DEO72_LG7g2413	Prenyltransferases [01006]; Carotenoid biosynthesis [00906]	GO:0004310~farnesyl-diphosphate farnesyltransferase activity;GO:0051996~squalene synthase activity	GO:0006696~ergosterol biosynthetic process	NA
vun-miR1514a-3p	XM_028084715.1	5	-1	1	21	103	123	AUGCCUAUUUUAAAAUGAAAA	UUUUCUUUUUAAAAAAGGAAG	Cleavage	PREDICTED: Vigna unguiculata phytoene synthase 2, chloroplastic (LOC114194468), transcript variant X4, mRNA	1	Phytoene synthase	DEO72_LG7g2413	Prenyltransferases [01006]; Carotenoid biosynthesis [00906]	GO:0004310~farnesyl-diphosphate farnesyltransferase activity;GO:0051996~squalene synthase activity	GO:0006696~ergosterol biosynthetic process	NA
vun-miR1514a-3p	XM_028085095.1	4	-1	1	21	1838	1858	AUGCCUAUUUUAAAAUGAAAA	GUUUUAUUUUUAAAUAGGUUU	Translation	PREDICTED: Vigna unguiculata allene oxide synthase 1, chloroplastic (LOC114194721), mRNA	1	Hydroperoxide dehydratase	DEO72_LG7g187	alpha-Linolenic acid metabolism [00592]; Cytochrome P450 [00199]	GO:0004497~monooxygenase activity;GO:0005506~iron ion binding;GO:0016705~oxidoreductase activity, acting on paired donors, with incorporation or reduction of molecular oxygen;GO:0020037~heme binding	NA	NA
vun-miR1514a-3p	XM_028086272.1	5	-1	1	21	1162	1182	AUGCCUAUUUUAAAAUGAAAA	UUUUUGUUGAAAAAUAGGCAA	Cleavage	PREDICTED: Vigna unguiculata protein SRG1 (LOC114195853), mRNA	1	Protein SRG1	SRG1 CR513_36628	NA	GO:0016491~oxidoreductase activity;GO:0046872~metal ion binding	NA	NA
vun-miR1514a-3p	XM_028086707.1	5	-1	1	21	841	861	AUGCCUAUUUUAAAAUGAAAA	UUUUUACUUAAAAAUAUGUAU	Cleavage	PREDICTED: Vigna unguiculata iron-sulfur cluster assembly protein 1-like (LOC114196156), mRNA	1	Iron-sulfur cluster assembly protein	DEO72_LG11g1482	Mitochondrial biogenesis [03029]	GO:0005506~iron ion binding;GO:0051537~2 iron, 2 sulfur cluster binding	GO:0016226~iron-sulfur cluster assembly	GO:0005759~mitochondrial matrix
vun-miR1514a-3p	XR_003599696.1	4	-1	1	21	9	29	AUGCCUAUUUUAAAAUGAAAA	UUUGUGUUUUAAAAUAGGUUU	Cleavage	PREDICTED: Vigna unguiculata uncharacterized LOC114165334 (LOC114165334), ncRNA	1	NA	NA	NA	NA	NA	NA
vun-miR1514a-3p	XR_003603194.1	3	-1	1	21	2153	2174	AUGCCUAUUUU-AAAAUGAAAA	UUUUCAUUUUUAAAAUAGGCAU	Translation	PREDICTED: Vigna unguiculata AP-5 complex subunit mu (LOC114177732), transcript variant X4, misc_RNA	1	NA	NA	NA	NA	NA	NA
vun-miR1514a-3p	XR_003603195.1	3	-1	1	21	2153	2174	AUGCCUAUUUU-AAAAUGAAAA	UUUUCAUUUUUAAAAUAGGCAU	Translation	PREDICTED: Vigna unguiculata AP-5 complex subunit mu (LOC114177732), transcript variant X5, misc_RNA	1	NA	NA	NA	NA	NA	NA
vun-miR1514a-3p	XR_003604731.1	3.5	-1	1	21	2368	2388	AUGCCUAUUUUAAAAUGAAAA	GUUUCAUUUUAGAGUAUGUGU	Cleavage	PREDICTED: Vigna unguiculata pentatricopeptide repeat-containing protein At4g28010-like (LOC114185019), transcript variant X1, misc_RNA	1	NA	NA	NA	NA	NA	NA
vun-miR1514a-3p	XR_003604732.1	3.5	-1	1	21	2368	2388	AUGCCUAUUUUAAAAUGAAAA	GUUUCAUUUUAGAGUAUGUGU	Cleavage	PREDICTED: Vigna unguiculata pentatricopeptide repeat-containing protein At4g28010-like (LOC114185019), transcript variant X2, misc_RNA	1	NA	NA	NA	NA	NA	NA
vun-miR1514a-3p	XR_003604956.1	4	-1	1	21	3100	3120	AUGCCUAUUUUAAAAUGAAAA	CUUUUUUUUUAACAUGGGUAU	Cleavage	PREDICTED: Vigna unguiculata pentatricopeptide repeat-containing protein At3g18970 (LOC114186007), transcript variant X3, misc_RNA	1	NA	NA	NA	NA	NA	NA
vun-miR1514a-3p	XR_003605689.1	4	-1	1	21	1710	1730	AUGCCUAUUUUAAAAUGAAAA	UGUUUAUUUGGAGAUGGGUAU	Cleavage	PREDICTED: Vigna unguiculata flap endonuclease 1 (LOC114189546), transcript variant X1, misc_RNA	1	NA	NA	NA	NA	NA	NA
vun-miR167c-5p	XM_028047057.1	5	-1	1	21	1309	1329	UGAAGCUGCCAGCAUGAUCUA	UGGCUUGUUUUGGCAGCUUCU	Cleavage	PREDICTED: Vigna unguiculata mannan endo-1,4-beta-mannosidase 7-like (LOC114163014), mRNA	1	Glycoside hydrolase superfamily	DEO72_LG11g3644	Fructose and mannose metabolism [00051]	GO:0004553~hydrolase activity, hydrolyzing O-glycosyl compounds	GO:0005975~carbohydrate metabolic process	NA
vun-miR167c-5p	XM_028047303.1	3.5	-1	1	21	628	648	UGAAGCUGCCAGCAUGAUCUA	UGGAUUGUGCUGGUAAUUUCA	Cleavage	PREDICTED: Vigna unguiculata thiol protease aleurain-like (LOC114163167), mRNA	1	Cathepsin H	DEO72_LG11g568	Peptidases and inhibitors [01002]	GO:0008234~cysteine-type peptidase activity	NA	NA
vun-miR167c-5p	XM_028047646.1	3.5	-1	1	21	1394	1414	UGAAGCUGCCAGCAUGAUCUA	AUGGACAUGCUGGCAUUUUCA	Cleavage	PREDICTED: Vigna unguiculata rhamnogalacturonan I rhamnosyltransferase 1-like (LOC114163372), mRNA	1	Uncharacterized protein	Saspl_006033	Glycosyltransferases [01003]	GO:0016757~transferase activity, transferring glycosyl groups	GO:0006004~fucose metabolic process	GO:0016021~integral component of membrane
vun-miR167c-5p	XM_028047749.1	5	-1	1	21	1305	1325	UGAAGCUGCCAGCAUGAUCUA	CAGAUCAUGCUUGUGGGUUUG	Translation	PREDICTED: Vigna unguiculata F-box only protein 6 (LOC114163435), mRNA	1	Galactose oxidase	DEO72_LG11g80	NA	NA	NA	NA
vun-miR167c-5p	XM_028048181.1	4	-1	1	21	978	998	UGAAGCUGCCAGCAUGAUCUA	AGGAUUAUGAUAGCAGCUUUA	Translation	PREDICTED: Vigna unguiculata protein SDA1 homolog (LOC114163829), mRNA	1	Protein SDA1	DEO72_LG11g876	Ribosome biogenesis [03009]	NA	GO:0000055~ribosomal large subunit export from nucleus;GO:0030036~actin cytoskeleton organization;GO:0042273~ribosomal large subunit biogenesis	GO:0005730~nucleolus
vun-miR167c-5p	XM_028048531.1	5	-1	1	21	631	651	UGAAGCUGCCAGCAUGAUCUA	UACGUGGUGCUGGUGGCUUCU	Cleavage	PREDICTED: Vigna unguiculata enoyl-CoA hydratase 2, peroxisomal (LOC114164056), transcript variant X1, mRNA	1	MaoC-like domain-containing protein	102584477	Enzymes with EC numbers[99980]	GO:0080023~3R-hydroxyacyl-CoA dehydratase activity	GO:0033542~fatty acid beta-oxidation, unsaturated, even number	GO:0005777~peroxisome
vun-miR167c-5p	XM_028048532.1	5	-1	1	21	538	558	UGAAGCUGCCAGCAUGAUCUA	UACGUGGUGCUGGUGGCUUCU	Cleavage	PREDICTED: Vigna unguiculata enoyl-CoA hydratase 2, peroxisomal (LOC114164056), transcript variant X2, mRNA	1	MaoC-like domain-containing protein	102584477	Enzymes with EC numbers[99980]	GO:0080023~3R-hydroxyacyl-CoA dehydratase activity	GO:0033542~fatty acid beta-oxidation, unsaturated, even number	GO:0005777~peroxisome
vun-miR167c-5p	XM_028049082.1	3	-1	1	21	688	708	UGAAGCUGCCAGCAUGAUCUA	GCAAUGGUGUUGGCAGCUUCA	Cleavage	PREDICTED: Vigna unguiculata aspartic proteinase nepenthesin-1 (LOC114164411), mRNA	1	Aspartyl protease family protein	DEO72_LG11g2239	NA	GO:0004190~aspartic-type endopeptidase activity	NA	NA
vun-miR167c-5p	XM_028050308.1	4.5	-1	1	21	877	897	UGAAGCUGCCAGCAUGAUCUA	UGAAUCGUGCUGUUAGCUUUG	Cleavage	PREDICTED: Vigna unguiculata peroxisome biogenesis protein 2 (LOC114165732), mRNA	1	Peroxisome biogenesis protein 2 (Peroxisome biogenesis protein 2 isoform D)	D0Y65_016619 glysoja_032721	Ubiquitin system [04121]; Peroxisome [04146]	GO:0046872~metal ion binding	NA	NA
vun-miR167c-5p	XM_028050730.1	4.5	-1	1	21	1202	1222	UGAAGCUGCCAGCAUGAUCUA	AAUGGGGUGCUGGCAGCUUCA	Cleavage	PREDICTED: Vigna unguiculata laccase-6 (LOC114166074), mRNA	1	Laccase (EC 1.10.3.2) (Benzenediol:oxygen oxidoreductase) (Diphenol oxidase) (Urishiol oxidase)	DEO72_LG8g568	Enzymes with EC numbers[99980]	GO:0005507~copper ion binding;GO:0052716~hydroquinone:oxygen oxidoreductase activity	GO:0046274~lignin catabolic process	GO:0048046~apoplast
vun-miR167c-5p	XM_028050998.1	5	-1	1	21	392	412	UGAAGCUGCCAGCAUGAUCUA	AAGGUCAUGGUGGUGGCUAUA	Cleavage	PREDICTED: Vigna unguiculata RING-H2 finger protein ATL3 (LOC114166283), mRNA	1	E3 ubiquitin-protein ligase	DEO72_LG8g464	NA	NA	NA	GO:0016021~integral component of membrane
vun-miR167c-5p	XM_028051550.1	2.5	-1	1	21	537	557	UGAAGCUGCCAGCAUGAUCUA	GGUAUCAUGCUGGCAGCUGCA	Cleavage	PREDICTED: Vigna unguiculata mediator of RNA polymerase II transcription subunit 12-like (LOC114166757), transcript variant X1, mRNA	1	mediator of RNA polymerase II transcription subunit 12	LOC106774016	NA	GO:0003712~transcription cofactor activity	GO:0006357~regulation of transcription from RNA polymerase II promoter	GO:0016592~mediator complex
vun-miR167c-5p	XM_028051551.1	2.5	-1	1	21	532	552	UGAAGCUGCCAGCAUGAUCUA	GGUAUCAUGCUGGCAGCUGCA	Cleavage	PREDICTED: Vigna unguiculata mediator of RNA polymerase II transcription subunit 12-like (LOC114166757), transcript variant X2, mRNA	1	mediator of RNA polymerase II transcription subunit 12	LOC106774016	NA	GO:0003712~transcription cofactor activity	GO:0006357~regulation of transcription from RNA polymerase II promoter	GO:0016592~mediator complex
vun-miR167c-5p	XM_028052219.1	3.5	-1	1	21	2856	2876	UGAAGCUGCCAGCAUGAUCUA	CUGGUAGUGCUGGUAGCUUUG	Cleavage	PREDICTED: Vigna unguiculata G-type lectin S-receptor-like serine/threonine-protein kinase SD2-2 (LOC114167212), mRNA	1	Receptor-like serine/threonine-protein kinase (EC 2.7.11.1)	DEO72_LG8g739	NA	GO:0004674~protein serine/threonine kinase activity;GO:0005524~ATP binding	GO:0048544~recognition of pollen	GO:0016021~integral component of membrane
vun-miR167c-5p	XM_028052623.1	4.5	-1	1	21	290	310	UGAAGCUGCCAGCAUGAUCUA	GCUCUUAUGUUGGCAGCUCCA	Cleavage	PREDICTED: Vigna unguiculata patatin-like protein 3 (LOC114167522), mRNA	1	Patatin (EC 3.1.1.-)	LR48_Vigan11g164800	NA	GO:0016787~hydrolase activity	GO:0016042~lipid catabolic process	NA
vun-miR167c-5p	XM_028052708.1	4.5	-1	1	21	563	583	UGAAGCUGCCAGCAUGAUCUA	UGGAUCAUAUUGGUGGCGUCA	Cleavage	PREDICTED: Vigna unguiculata metal transporter Nramp6-like (LOC114167603), transcript variant X1, mRNA	1	Manganese transport protein	DEO72_LG8g173	Transporters [02000]	GO:0046873~metal ion transmembrane transporter activity	NA	GO:0016021~integral component of membrane
vun-miR167c-5p	XM_028052709.1	4.5	-1	1	21	146	166	UGAAGCUGCCAGCAUGAUCUA	UGGAUCAUAUUGGUGGCGUCA	Cleavage	PREDICTED: Vigna unguiculata metal transporter Nramp6-like (LOC114167603), transcript variant X2, mRNA	1	Manganese transport protein	DEO72_LG8g173	Transporters [02000]	GO:0046873~metal ion transmembrane transporter activity	NA	GO:0016021~integral component of membrane
vun-miR167c-5p	XM_028052790.1	5	-1	1	21	7	27	UGAAGCUGCCAGCAUGAUCUA	UAGAUCGUGUUUGUGGGUUCA	Translation	PREDICTED: Vigna unguiculata inositol-pentakisphosphate 2-kinase-like (LOC114167670), transcript variant X2, mRNA	1	Inositol-pentakisphosphate 2-kinase (EC 2.7.1.158)	DEO72_LG8g641	Phosphatidylinositol signaling system [04070]; Inositol phosphate metabolism [00562]	GO:0005524~ATP binding;GO:0035299~inositol pentakisphosphate 2-kinase activity	NA	NA
vun-miR167c-5p	XM_028052794.1	5	-1	1	21	7	27	UGAAGCUGCCAGCAUGAUCUA	UAGAUCGUGUUUGUGGGUUCA	Translation	PREDICTED: Vigna unguiculata inositol-pentakisphosphate 2-kinase-like (LOC114167670), transcript variant X6, mRNA	1	Inositol-pentakisphosphate 2-kinase (EC 2.7.1.158)	DEO72_LG8g641	Phosphatidylinositol signaling system [04070]; Inositol phosphate metabolism [00562]	GO:0005524~ATP binding;GO:0035299~inositol pentakisphosphate 2-kinase activity	NA	NA
vun-miR167c-5p	XM_028052795.1	5	-1	1	21	7	27	UGAAGCUGCCAGCAUGAUCUA	UAGAUCGUGUUUGUGGGUUCA	Translation	PREDICTED: Vigna unguiculata inositol-pentakisphosphate 2-kinase-like (LOC114167670), transcript variant X7, mRNA	1	Inositol-pentakisphosphate 2-kinase (EC 2.7.1.158)	DEO72_LG8g641	Phosphatidylinositol signaling system [04070]; Inositol phosphate metabolism [00562]	GO:0005524~ATP binding;GO:0035299~inositol pentakisphosphate 2-kinase activity	NA	NA
vun-miR167c-5p	XM_028052796.1	5	-1	1	21	7	27	UGAAGCUGCCAGCAUGAUCUA	UAGAUCGUGUUUGUGGGUUCA	Translation	PREDICTED: Vigna unguiculata inositol-pentakisphosphate 2-kinase-like (LOC114167670), transcript variant X8, mRNA	1	Inositol-pentakisphosphate 2-kinase (EC 2.7.1.158)	DEO72_LG8g641	Phosphatidylinositol signaling system [04070]; Inositol phosphate metabolism [00562]	GO:0005524~ATP binding;GO:0035299~inositol pentakisphosphate 2-kinase activity	NA	NA
vun-miR167c-5p	XM_028052797.1	5	-1	1	21	7	27	UGAAGCUGCCAGCAUGAUCUA	UAGAUCGUGUUUGUGGGUUCA	Translation	PREDICTED: Vigna unguiculata inositol-pentakisphosphate 2-kinase-like (LOC114167670), transcript variant X9, mRNA	1	Inositol-pentakisphosphate 2-kinase (EC 2.7.1.158)	DEO72_LG8g641	Phosphatidylinositol signaling system [04070]; Inositol phosphate metabolism [00562]	GO:0005524~ATP binding;GO:0035299~inositol pentakisphosphate 2-kinase activity	NA	NA
vun-miR167c-5p	XM_028052798.1	5	-1	1	21	7	27	UGAAGCUGCCAGCAUGAUCUA	UAGAUCGUGUUUGUGGGUUCA	Translation	PREDICTED: Vigna unguiculata inositol-pentakisphosphate 2-kinase-like (LOC114167670), transcript variant X10, mRNA	1	Inositol-pentakisphosphate 2-kinase (EC 2.7.1.158)	DEO72_LG8g641	Phosphatidylinositol signaling system [04070]; Inositol phosphate metabolism [00562]	GO:0005524~ATP binding;GO:0035299~inositol pentakisphosphate 2-kinase activity	NA	NA
vun-miR167c-5p	XM_028052926.1	3.5	-1	1	21	898	917	UGAAGCUGCCAGCAUGAUCUA	UGGGUC-UGUUGGUAGCUUCA	Cleavage	PREDICTED: Vigna unguiculata mitochondrial phosphate carrier protein 1, mitochondrial (LOC114168185), transcript variant X1, mRNA	1	Solute carrier family 25	DEO72_LG4g2188	Transporters [02000]; Exosome [04147]	NA	NA	GO:0016021~integral component of membrane
vun-miR167c-5p	XM_028052930.1	3.5	-1	1	21	862	881	UGAAGCUGCCAGCAUGAUCUA	UGGGUC-UGUUGGUAGCUUCA	Cleavage	PREDICTED: Vigna unguiculata mitochondrial phosphate carrier protein 1, mitochondrial (LOC114168185), transcript variant X2, mRNA	1	Solute carrier family 25	DEO72_LG4g2188	Transporters [02000]; Exosome [04147]	NA	NA	GO:0016021~integral component of membrane
vun-miR167c-5p	XM_028053275.1	4	-1	1	21	663	683	UGAAGCUGCCAGCAUGAUCUA	CAGGCAAUGGUGGCAGCUUCA	Cleavage	PREDICTED: Vigna unguiculata GPI inositol-deacylase (LOC114168455), transcript variant X1, mRNA	1	Glycosylphosphatidylinositol deacylase	DEO72_LG3g3364	Glycosylphosphatidylinositol (GPI)-anchor biosynthesis [00563]; Membrane trafficking [04131]	GO:0016788~hydrolase activity, acting on ester bonds	NA	GO:0016021~integral component of membrane
vun-miR167c-5p	XM_028053276.1	4	-1	1	21	636	656	UGAAGCUGCCAGCAUGAUCUA	CAGGCAAUGGUGGCAGCUUCA	Cleavage	PREDICTED: Vigna unguiculata GPI inositol-deacylase (LOC114168455), transcript variant X2, mRNA	1	Glycosylphosphatidylinositol deacylase	DEO72_LG3g3364	Glycosylphosphatidylinositol (GPI)-anchor biosynthesis [00563]; Membrane trafficking [04131]	GO:0016788~hydrolase activity, acting on ester bonds	NA	GO:0016021~integral component of membrane
vun-miR167c-5p	XM_028053277.1	4	-1	1	21	976	996	UGAAGCUGCCAGCAUGAUCUA	CAGGCAAUGGUGGCAGCUUCA	Cleavage	PREDICTED: Vigna unguiculata GPI inositol-deacylase (LOC114168455), transcript variant X3, mRNA	1	Glycosylphosphatidylinositol deacylase	DEO72_LG3g3364	Glycosylphosphatidylinositol (GPI)-anchor biosynthesis [00563]; Membrane trafficking [04131]	GO:0016788~hydrolase activity, acting on ester bonds	NA	GO:0016021~integral component of membrane
vun-miR167c-5p	XM_028055347.1	4.5	-1	1	21	2199	2219	UGAAGCUGCCAGCAUGAUCUA	AAGAUCUUCCUGGCGGCUUGA	Cleavage	PREDICTED: Vigna unguiculata SART-1 family protein DOT2-like (LOC114169941), transcript variant X1, mRNA	1	U4/U6.U5 tri-snRNP-associated protein 1	DEO72_LG3g355	Spliceosome [03040]; Ubiquitin system [04121]; Spliceosome [03041]	NA	GO:0000398~mRNA splicing, via spliceosome	NA
vun-miR167c-5p	XM_028055348.1	4.5	-1	1	21	2195	2215	UGAAGCUGCCAGCAUGAUCUA	AAGAUCUUCCUGGCGGCUUGA	Cleavage	PREDICTED: Vigna unguiculata SART-1 family protein DOT2-like (LOC114169941), transcript variant X2, mRNA	1	U4/U6.U5 tri-snRNP-associated protein 1	DEO72_LG3g355	Spliceosome [03040]; Ubiquitin system [04121]; Spliceosome [03041]	NA	GO:0000398~mRNA splicing, via spliceosome	NA
vun-miR167c-5p	XM_028055380.1	4.5	-1	1	21	2152	2172	UGAAGCUGCCAGCAUGAUCUA	AAGAUCUUCCUGGCGGCUUGA	Cleavage	PREDICTED: Vigna unguiculata SART-1 family protein DOT2-like (LOC114169965), transcript variant X1, mRNA	1	U4/U6.U5 tri-snRNP-associated protein 1	DEO72_LG3g355	Spliceosome [03040]; Ubiquitin system [04121]; Spliceosome [03041]	NA	GO:0000398~mRNA splicing, via spliceosome	NA
vun-miR167c-5p	XM_028055381.1	4.5	-1	1	21	2026	2046	UGAAGCUGCCAGCAUGAUCUA	AAGAUCUUCCUGGCGGCUUGA	Cleavage	PREDICTED: Vigna unguiculata SART-1 family protein DOT2-like (LOC114169965), transcript variant X2, mRNA	1	U4/U6.U5 tri-snRNP-associated protein 1	DEO72_LG3g355	Spliceosome [03040]; Ubiquitin system [04121]; Spliceosome [03041]	NA	GO:0000398~mRNA splicing, via spliceosome	NA
vun-miR167c-5p	XM_028055382.1	4.5	-1	1	21	1166	1186	UGAAGCUGCCAGCAUGAUCUA	AAGAUCUUCCUGGCGGCUUGA	Cleavage	PREDICTED: Vigna unguiculata SART-1 family protein DOT2-like (LOC114169965), transcript variant X3, mRNA	1	SWIM-type domain-containing protein	D0Y65_038144	NA	GO:0008270~zinc ion binding	NA	NA
vun-miR167c-5p	XM_028055383.1	4.5	-1	1	21	1162	1182	UGAAGCUGCCAGCAUGAUCUA	AAGAUCUUCCUGGCGGCUUGA	Cleavage	PREDICTED: Vigna unguiculata SART-1 family protein DOT2-like (LOC114169965), transcript variant X4, mRNA	1	SWIM-type domain-containing protein	D0Y65_038144	NA	GO:0008270~zinc ion binding	NA	NA
vun-miR167c-5p	XM_028055384.1	4.5	-1	1	21	1040	1060	UGAAGCUGCCAGCAUGAUCUA	AAGAUCUUCCUGGCGGCUUGA	Cleavage	PREDICTED: Vigna unguiculata SART-1 family protein DOT2-like (LOC114169965), transcript variant X5, mRNA	1	SWIM-type domain-containing protein	D0Y65_038144	NA	GO:0008270~zinc ion binding	NA	NA
vun-miR167c-5p	XM_028055537.1	4.5	-1	1	21	422	442	UGAAGCUGCCAGCAUGAUCUA	GAGAACAUGUUGGCAUGUUCA	Cleavage	PREDICTED: Vigna unguiculata dof zinc finger protein DOF2.1 (LOC114170059), mRNA	1	Dof-type domain-containing protein	DEO72_LG3g2814	NA	GO:0003677~DNA binding	GO:0006355~regulation of transcription, DNA-templated	GO:0005634~nucleus
vun-miR167c-5p	XM_028055858.1	5	-1	1	21	851	871	UGAAGCUGCCAGCAUGAUCUA	CAGGUCAUGGUGGGGGCUUUG	Cleavage	PREDICTED: Vigna unguiculata glycine-rich cell wall structural protein 1-like (LOC114170380), mRNA	1	Uncharacterized protein	DEO72_LG3g2485	NA	NA	NA	NA
vun-miR167c-5p	XM_028056494.1	4.5	-1	1	21	2588	2608	UGAAGCUGCCAGCAUGAUCUA	GAGGUCGUGUUGGUAACUUCU	Cleavage	PREDICTED: Vigna unguiculata stromal processing peptidase, chloroplastic (LOC114171546), mRNA	1	Zinc protease	DEO72_LG4g2774	NA	GO:0008233~peptidase activity;GO:0046872~metal ion binding	NA	NA
vun-miR167c-5p	XM_028057277.1	4	-1	1	21	551	571	UGAAGCUGCCAGCAUGAUCUA	UCGUUCAUGCUCGCAGCGUCA	Translation	PREDICTED: Vigna unguiculata dirigent protein 22-like (LOC114173062), mRNA	1	Dirigent protein	DEO72_LG6g2273 DEO72_LG6g2274	NA	NA	NA	GO:0048046~apoplast
vun-miR167c-5p	XM_028058054.1	4	-1	1	21	770	789	UGAAGCUGCCAGCAUGAUCUA	UGGAUCAUGUUGGC-GCUUUA	Cleavage	PREDICTED: Vigna unguiculata cleavage and polyadenylation specificity factor subunit 3-II (LOC114173570), transcript variant X1, mRNA	1	Integrase core domain containing protein	NA	Spliceosome [03041]	GO:0003676~nucleic acid binding	GO:0015074~DNA integration	NA
vun-miR167c-5p	XM_028058055.1	4	-1	1	21	837	856	UGAAGCUGCCAGCAUGAUCUA	UGGAUCAUGUUGGC-GCUUUA	Cleavage	PREDICTED: Vigna unguiculata cleavage and polyadenylation specificity factor subunit 3-II (LOC114173570), transcript variant X2, mRNA	1	Integrase core domain containing protein	NA	Spliceosome [03041]	GO:0003676~nucleic acid binding	GO:0015074~DNA integration	NA
vun-miR167c-5p	XM_028058137.1	4.5	-1	1	21	4378	4398	UGAAGCUGCCAGCAUGAUCUA	GUGAUCUUGUUGGCAGUUUGG	Cleavage	PREDICTED: Vigna unguiculata F-box protein At3g54460 (LOC114173637), mRNA	1	DNA repair protein RAD16	DEO72_LG6g359	NA	GO:0005524~ATP binding;GO:0008270~zinc ion binding	NA	NA
vun-miR167c-5p	XM_028058445.1	4	-1	1	21	127	147	UGAAGCUGCCAGCAUGAUCUA	CUGAUGAUGAUGGCAGCUUUU	Cleavage	PREDICTED: Vigna unguiculata mavicyanin-like (LOC114173820), mRNA	1	Cupredoxin	DEO72_LG4g2828	NA	GO:0009055~electron carrier activity	NA	GO:0016021~integral component of membrane
vun-miR167c-5p	XM_028058817.1	3.5	-1	1	21	1964	1984	UGAAGCUGCCAGCAUGAUCUA	CAGGCUAUGGUGGCAGCUUCA	Cleavage	PREDICTED: Vigna unguiculata zinc finger CCCH domain-containing protein 55-like (LOC114174072), transcript variant X1, mRNA	1	Uncharacterized protein	DEO72_LG4g2708	NA	GO:0003723~RNA binding;GO:0046872~metal ion binding	NA	NA
vun-miR167c-5p	XM_028058818.1	3.5	-1	1	21	1875	1895	UGAAGCUGCCAGCAUGAUCUA	CAGGCUAUGGUGGCAGCUUCA	Cleavage	PREDICTED: Vigna unguiculata zinc finger CCCH domain-containing protein 55-like (LOC114174072), transcript variant X2, mRNA	1	Uncharacterized protein	DEO72_LG4g2708	NA	GO:0003723~RNA binding;GO:0046872~metal ion binding	NA	NA
vun-miR167c-5p	XM_028058820.1	3.5	-1	1	21	1935	1955	UGAAGCUGCCAGCAUGAUCUA	CAGGCUAUGGUGGCAGCUUCA	Cleavage	PREDICTED: Vigna unguiculata zinc finger CCCH domain-containing protein 55-like (LOC114174072), transcript variant X3, mRNA	1	Uncharacterized protein	DEO72_LG4g2708	NA	GO:0003723~RNA binding;GO:0046872~metal ion binding	NA	NA
vun-miR167c-5p	XM_028060381.1	4.5	-1	1	21	404	424	UGAAGCUGCCAGCAUGAUCUA	UGGAUCAUAUUGGUGGCAUCA	Cleavage	PREDICTED: Vigna unguiculata metal transporter Nramp6-like (LOC114175616), transcript variant X1, mRNA	1	Manganese transport protein	DEO72_LG6g909	NA	GO:0046873~metal ion transmembrane transporter activity	NA	GO:0016021~integral component of membrane
vun-miR167c-5p	XM_028060389.1	4.5	-1	1	21	416	436	UGAAGCUGCCAGCAUGAUCUA	UGGAUCAUAUUGGUGGCAUCA	Cleavage	PREDICTED: Vigna unguiculata metal transporter Nramp6-like (LOC114175616), transcript variant X2, mRNA	1	Manganese transport protein	DEO72_LG6g909	NA	GO:0046873~metal ion transmembrane transporter activity	NA	GO:0016021~integral component of membrane
vun-miR167c-5p	XM_028060397.1	4.5	-1	1	21	368	388	UGAAGCUGCCAGCAUGAUCUA	UGGAUCAUAUUGGUGGCAUCA	Cleavage	PREDICTED: Vigna unguiculata metal transporter Nramp6-like (LOC114175616), transcript variant X3, mRNA	1	Manganese transport protein	DEO72_LG6g909	NA	GO:0046873~metal ion transmembrane transporter activity	NA	GO:0016021~integral component of membrane
vun-miR167c-5p	XM_028060406.1	4.5	-1	1	21	475	495	UGAAGCUGCCAGCAUGAUCUA	UGGAUCAUAUUGGUGGCAUCA	Cleavage	PREDICTED: Vigna unguiculata metal transporter Nramp6-like (LOC114175616), transcript variant X4, mRNA	1	Manganese transport protein	DEO72_LG6g909	NA	GO:0046873~metal ion transmembrane transporter activity	NA	GO:0016021~integral component of membrane
vun-miR167c-5p	XM_028060427.1	5	-1	1	21	560	580	UGAAGCUGCCAGCAUGAUCUA	GAAAAGAUGUUGGUAGCUUCA	Cleavage	PREDICTED: Vigna unguiculata zinc finger matrin-type protein 2 (LOC114175652), mRNA	1	Uncharacterized protein MANES_09G175700	NA	Spliceosome [03041]; Spliceosome [03040]	NA	GO:0000398~mRNA splicing, via spliceosome	GO:0005681~spliceosomal complex
vun-miR167c-5p	XM_028061861.1	3.5	-1	1	21	3534	3554	UGAAGCUGCCAGCAUGAUCUA	GAGAUCAGGCUGGCAGCUUGU	Cleavage	PREDICTED: Vigna unguiculata auxin response factor 6-like (LOC114176727), transcript variant X1, mRNA	1	Auxin response factor	DEO72_LG2g3786	NA	GO:0003677~DNA binding	GO:0006355~regulation of transcription, DNA-templated;GO:0009734~auxin-activated signaling pathway	GO:0005634~nucleus
vun-miR167c-5p	XM_028061862.1	3.5	-1	1	21	3530	3550	UGAAGCUGCCAGCAUGAUCUA	GAGAUCAGGCUGGCAGCUUGU	Cleavage	PREDICTED: Vigna unguiculata auxin response factor 6-like (LOC114176727), transcript variant X2, mRNA	1	Auxin response factor	DEO72_LG2g3786	NA	GO:0003677~DNA binding	GO:0006355~regulation of transcription, DNA-templated;GO:0009734~auxin-activated signaling pathway	GO:0005634~nucleus
vun-miR167c-5p	XM_028062178.1	2.5	-1	1	21	1782	1802	UGAAGCUGCCAGCAUGAUCUA	AGGGUAGUGCUGGCGGCUUCA	Cleavage	PREDICTED: Vigna unguiculata probable receptor-like serine/threonine-protein kinase At5g57670 (LOC114176975), transcript variant X1, mRNA	1	Serine/threonine-protein kinase PBS1	DEO72_LG2g746	NA	GO:0004672~protein kinase activity;GO:0005524~ATP binding	NA	NA
vun-miR167c-5p	XM_028062179.1	2.5	-1	1	21	1779	1799	UGAAGCUGCCAGCAUGAUCUA	AGGGUAGUGCUGGCGGCUUCA	Cleavage	PREDICTED: Vigna unguiculata probable receptor-like serine/threonine-protein kinase At5g57670 (LOC114176975), transcript variant X2, mRNA	1	Serine/threonine-protein kinase PBS1	DEO72_LG2g746	NA	GO:0004672~protein kinase activity;GO:0005524~ATP binding	NA	NA
vun-miR167c-5p	XM_028062420.1	5	-1	1	21	854	874	UGAAGCUGCCAGCAUGAUCUA	AGGAUCAUGCUGGUGGGUUGU	Cleavage	PREDICTED: Vigna unguiculata F-box only protein 6-like (LOC114177166), mRNA	1	Galactose oxidase	DEO72_LG2g3895	NA	NA	NA	NA
vun-miR167c-5p	XM_028062428.1	4	-1	1	21	804	824	UGAAGCUGCCAGCAUGAUCUA	GGCACCAUGCUGGAAGCUUUA	Cleavage	PREDICTED: Vigna unguiculata sodium/hydrogen exchanger 6-like (LOC114177173), transcript variant X1, mRNA	1	Solute carrier family 9	DEO72_LG2g168	Transporters [02000]	GO:0015299~solute:proton antiporter activity	NA	GO:0016021~integral component of membrane
vun-miR167c-5p	XM_028062677.1	4.5	-1	1	21	719	739	UGAAGCUGCCAGCAUGAUCUA	CGGAUCAUGUUGGUAACAUUA	Cleavage	PREDICTED: Vigna unguiculata uncharacterized LOC114177368 (LOC114177368), mRNA	1	S-adenosyl-L-methionine-dependent methyltransferase	DEO72_LG2g1002	NA	GO:0008168~methyltransferase activity	GO:0032259~methylation	NA
vun-miR167c-5p	XM_028063073.1	4.5	-1	1	21	2832	2852	UGAAGCUGCCAGCAUGAUCUA	UGAAUCAAGCUGGCAGCUUGC	Cleavage	PREDICTED: Vigna unguiculata ABC transporter B family member 11-like (LOC114177645), mRNA	1	ATP-binding cassette	DEO72_LG2g465	ABC transporters [02010]; Transporters [02000]; Exosome [04147]; CD molecules [04090]	GO:0005524~ATP binding;GO:0016887~ATPase activity;GO:0042626~ATPase activity, coupled to transmembrane movement of substances	NA	GO:0016021~integral component of membrane
vun-miR167c-5p	XM_028064061.1	4.5	-1	1	21	360	379	UGAAGCUGCCAGCAUGAUCUA	UGGAU-AUGCUGGUGGCUUUC	Cleavage	PREDICTED: Vigna unguiculata heterogeneous nuclear ribonucleoprotein H3 (LOC114178255), transcript variant X1, mRNA	1	RRM domain-containing protein	PHAVU_003G269800g	Spliceosome [03041]	GO:0003723~RNA binding	NA	NA
vun-miR167c-5p	XM_028064063.1	4.5	-1	1	21	271	290	UGAAGCUGCCAGCAUGAUCUA	UGGAU-AUGCUGGUGGCUUUC	Cleavage	PREDICTED: Vigna unguiculata heterogeneous nuclear ribonucleoprotein H3 (LOC114178255), transcript variant X2, mRNA	1	RRM domain-containing protein	PHAVU_003G269800g	Spliceosome [03041]	GO:0003723~RNA binding	NA	NA
vun-miR167c-5p	XM_028064359.1	3.5	-1	1	21	2655	2675	UGAAGCUGCCAGCAUGAUCUA	CUUAUGAUGUUGGUAGUUUCA	Cleavage	PREDICTED: Vigna unguiculata putative pentatricopeptide repeat-containing protein At3g16890, mitochondrial (LOC114178446), transcript variant X1, mRNA	1	Structure-specific endonuclease subunit SLX1	DEO72_LG2g2206	NA	GO:0004519~endonuclease activity	NA	NA
vun-miR167c-5p	XM_028064360.1	3.5	-1	1	21	2655	2675	UGAAGCUGCCAGCAUGAUCUA	CUUAUGAUGUUGGUAGUUUCA	Cleavage	PREDICTED: Vigna unguiculata putative pentatricopeptide repeat-containing protein At3g16890, mitochondrial (LOC114178446), transcript variant X2, mRNA	1	Structure-specific endonuclease subunit SLX1	DEO72_LG2g2206	NA	GO:0004519~endonuclease activity	NA	NA
vun-miR167c-5p	XM_028064361.1	3.5	-1	1	21	2655	2675	UGAAGCUGCCAGCAUGAUCUA	CUUAUGAUGUUGGUAGUUUCA	Cleavage	PREDICTED: Vigna unguiculata putative pentatricopeptide repeat-containing protein At3g16890, mitochondrial (LOC114178446), transcript variant X3, mRNA	1	Structure-specific endonuclease subunit SLX1	DEO72_LG2g2206	NA	GO:0004519~endonuclease activity	NA	NA
vun-miR167c-5p	XM_028064430.1	5	-1	1	21	1640	1660	UGAAGCUGCCAGCAUGAUCUA	UAUGUUGUGCUGGCAGCAUCU	Cleavage	PREDICTED: Vigna unguiculata probable lipid phosphate phosphatase beta (LOC114178494), transcript variant X1, mRNA	1	Phosphatidic acid phosphatase type 2/haloperoxidase	DEO72_LG2g1590	Enzymes with EC numbers[99980]	GO:0004601~peroxidase activity	NA	GO:0016021~integral component of membrane
vun-miR167c-5p	XM_028064718.1	4	-1	1	21	266	286	UGAAGCUGCCAGCAUGAUCUA	GAAAAUAUGCUGGUAGCUUUG	Cleavage	PREDICTED: Vigna unguiculata probable xyloglucan endotransglucosylase/hydrolase protein 26 (LOC114178675), mRNA	1	Xyloglucan endotransglucosylase/hydrolase (EC 2.4.1.207)	DEO72_LG2g5624	Enzymes with EC numbers[99980]	GO:0004553~hydrolase activity, hydrolyzing O-glycosyl compounds;GO:0016762~xyloglucan:xyloglucosyl transferase activity	GO:0010411~xyloglucan metabolic process;GO:0042546~cell wall biogenesis;GO:0071555~cell wall organization	GO:0005618~cell wall;GO:0048046~apoplast
vun-miR167c-5p	XM_028064989.1	4.5	-1	1	21	2005	2024	UGAAGCUGCCAGCAUGAUCUA	AAGAUCAUCCUGGCA-CUUCA	Cleavage	PREDICTED: Vigna unguiculata zeaxanthin epoxidase, chloroplastic-like (LOC114178865), mRNA	1	Zeaxanthin epoxidase, chloroplastic (EC 1.14.15.21)	DEO72_LG2g1959	PATHWAY: Plant hormone biosynthesis; abscisate biosynthesis. {ECO:0000256|PIRNR:PIRNR036989}.; Carotenoid biosynthesis [00906]	GO:0009540~zeaxanthin epoxidase [overall] activity;GO:0071949~FAD binding	GO:0009688~abscisic acid biosynthetic process	GO:0009507~chloroplast;GO:0016020~membrane
vun-miR167c-5p	XM_028065252.1	5	-1	1	21	599	619	UGAAGCUGCCAGCAUGAUCUA	UAGAUUGUGCCGGCGCUUUCA	Translation	PREDICTED: Vigna unguiculata thiol protease aleurain-like (LOC114179052), mRNA	1	BED-type domain-containing protein	PHAVU_006G105700g	NA	GO:0003677~DNA binding;GO:0046983~protein dimerization activity	NA	NA
vun-miR167c-5p	XM_028065899.1	5	-1	1	21	109	129	UGAAGCUGCCAGCAUGAUCUA	AAGGUCAUGUUUUUAGUUUCA	Translation	PREDICTED: Vigna unguiculata pterin-4-alpha-carbinolamine dehydratase 2, mitochondrial-like (LOC114179529), transcript variant X1, mRNA	1	4a-hydroxytetrahydrobiopterin dehydratase	DEO72_LG2g4903	Exosome [04147]; Folate biosynthesis [00790]	GO:0008124~4-alpha-hydroxytetrahydrobiopterin dehydratase activity	GO:0006729~tetrahydrobiopterin biosynthetic process	NA
vun-miR167c-5p	XM_028065982.1	4	-1	1	21	194	214	UGAAGCUGCCAGCAUGAUCUA	GCCAAUGUGCUGGCAGCUUCC	Cleavage	PREDICTED: Vigna unguiculata E3 ubiquitin-protein ligase AIRP2-like (LOC114179586), transcript variant X1, mRNA	1	RING-type domain-containing protein	DEO72_LG2g1299	NA	NA	NA	NA
vun-miR167c-5p	XM_028066282.1	2	-1	1	21	778	798	UGAAGCUGCCAGCAUGAUCUA	UCGAUUAUGCUGGUGGCUUCG	Cleavage	PREDICTED: Vigna unguiculata ammonium transporter 3 member 3-like (LOC114179817), mRNA	1	Ammonium transporter	DEO72_LG2g2451	Transporters [02000]	GO:0008519~ammonium transmembrane transporter activity	NA	GO:0016021~integral component of membrane
vun-miR167c-5p	XM_028066430.1	3.5	-1	1	21	2043	2063	UGAAGCUGCCAGCAUGAUCUA	CUGAUUAUGUUGGCAGCUUGG	Cleavage	PREDICTED: Vigna unguiculata GPI ethanolamine phosphate transferase 3 (LOC114179924), transcript variant X1, mRNA	1	Phosphatidylinositol glycan	DEO72_LG2g483	Glycosylphosphatidylinositol (GPI)-anchor biosynthesis [00563]	GO:0051377~mannose-ethanolamine phosphotransferase activity	GO:0006506~GPI anchor biosynthetic process	GO:0016021~integral component of membrane
vun-miR167c-5p	XM_028067057.1	3.5	-1	1	21	1942	1962	UGAAGCUGCCAGCAUGAUCUA	UUGGUCAUGUUUGCAGUUUUA	Translation	PREDICTED: Vigna unguiculata autophagy-related protein 9 (LOC114180764), mRNA	1	Autophagy-related protein 9	DEO72_LG6g2443	Transporters [02000]; Mitochondrial biogenesis [03029]; Autophagy - other [04136]; Membrane trafficking [04131]	NA	GO:0006914~autophagy;GO:0015031~protein transport	GO:0005794~Golgi apparatus;GO:0016021~integral component of membrane;GO:0030659~cytoplasmic vesicle membrane
vun-miR167c-5p	XM_028067190.1	4.5	-1	1	21	1644	1664	UGAAGCUGCCAGCAUGAUCUA	CAGCUUAUGGUGGUGGCUUUA	Cleavage	PREDICTED: Vigna unguiculata protein DA1-related 2-like (LOC114180870), transcript variant X1, mRNA	1	LIM homeobox protein 3/4	DEO72_LG6g3254	NA	GO:0003677~DNA binding;GO:0046872~metal ion binding	NA	NA
vun-miR167c-5p	XM_028067252.1	4.5	-1	1	21	1599	1619	UGAAGCUGCCAGCAUGAUCUA	CAGCUUAUGGUGGUGGCUUUA	Cleavage	PREDICTED: Vigna unguiculata protein DA1-related 2-like (LOC114180870), transcript variant X2, mRNA	1	LIM homeobox protein 3/4	DEO72_LG6g3254	NA	GO:0003677~DNA binding;GO:0046872~metal ion binding	NA	NA
vun-miR167c-5p	XM_028067948.1	4.5	-1	1	21	330	350	UGAAGCUGCCAGCAUGAUCUA	UGGGUCAUGUUGGAGGCAUCA	Cleavage	PREDICTED: Vigna unguiculata transcription factor MYB54-like (LOC114181479), mRNA	1	Myb proto-oncogene protein	DEO72_LG5g842	Transcription factors [03000]	GO:0003677~DNA binding	NA	GO:0005634~nucleus
vun-miR167c-5p	XM_028070377.1	3.5	-1	1	21	868	888	UGAAGCUGCCAGCAUGAUCUA	GGUAUGAUGUUGGCAGCUUCU	Cleavage	PREDICTED: Vigna unguiculata protein SIEL (LOC114183366), mRNA	1	Integrator complex subunit 4	DEO72_LG10g3304	Spliceosome [03041]	NA	NA	NA
vun-miR167c-5p	XM_028071032.1	4.5	-1	1	21	293	313	UGAAGCUGCCAGCAUGAUCUA	AUAUUCAUGCUGGCGGUGUCA	Cleavage	PREDICTED: Vigna unguiculata transcription activator GLK1 (LOC114183872), mRNA	1	Two-component response regulator ARR-B family	DEO72_LG10g928	NA	GO:0003677~DNA binding	NA	GO:0005634~nucleus
vun-miR167c-5p	XM_028071475.1	4.5	-1	1	21	2922	2942	UGAAGCUGCCAGCAUGAUCUA	UAAAUUCUGAUGGCAGCUUUA	Cleavage	PREDICTED: Vigna unguiculata pentatricopeptide repeat-containing protein At2g27610 (LOC114184199), mRNA	2	Structure-specific endonuclease subunit SLX1	DEO72_LG10g669	NA	GO:0004519~endonuclease activity;GO:0008270~zinc ion binding	NA	NA
vun-miR167c-5p	XM_028071475.1	5	-1	1	21	2213	2233	UGAAGCUGCCAGCAUGAUCUA	CGCAUUGUUUUGGCAGCUUCU	Cleavage	PREDICTED: Vigna unguiculata pentatricopeptide repeat-containing protein At2g27610 (LOC114184199), mRNA	2	Structure-specific endonuclease subunit SLX1	DEO72_LG10g669	NA	GO:0004519~endonuclease activity;GO:0008270~zinc ion binding	NA	NA
vun-miR167c-5p	XM_028071511.1	4.5	-1	1	21	2576	2596	UGAAGCUGCCAGCAUGAUCUA	AAUAUCAUGUUGGCUGCUUGA	Cleavage	PREDICTED: Vigna unguiculata uncharacterized LOC114184228 (LOC114184228), mRNA	1	Autoimmune regulator	DEO72_LG10g611	NA	GO:0046872~metal ion binding	NA	NA
vun-miR167c-5p	XM_028071900.1	5	-1	1	21	83	103	UGAAGCUGCCAGCAUGAUCUA	UGGUUCGUGCUGGCGACUUUC	Cleavage	PREDICTED: Vigna unguiculata uncharacterized LOC114184590 (LOC114184590), mRNA	1	Gag-pol polyprotein	BA23	NA	GO:0003676~nucleic acid binding;GO:0004523~RNA-DNA hybrid ribonuclease activity	GO:0015074~DNA integration	NA
vun-miR167c-5p	XM_028072135.1	5	-1	1	21	917	937	UGAAGCUGCCAGCAUGAUCUA	UAGAUCAUGUUUGUAGAUUCU	Translation	PREDICTED: Vigna unguiculata uncharacterized LOC114184822 (LOC114184822), mRNA	1	Putative transcriptional regulator	DEO72_LG10g3866	NA	NA	NA	NA
vun-miR167c-5p	XM_028072272.1	2.5	-1	1	21	590	610	UGAAGCUGCCAGCAUGAUCUA	GGUAUCAUGCUGGCAGCUGCA	Cleavage	PREDICTED: Vigna unguiculata mediator of RNA polymerase II transcription subunit 12-like (LOC114184889), transcript variant X1, mRNA	1	Mediator of RNA polymerase II transcription subunit 12	DEO72_LG10g2680	NA	GO:0003712~transcription cofactor activity	GO:0006357~regulation of transcription from RNA polymerase II promoter	GO:0016592~mediator complex
vun-miR167c-5p	XM_028072273.1	2.5	-1	1	21	601	621	UGAAGCUGCCAGCAUGAUCUA	GGUAUCAUGCUGGCAGCUGCA	Cleavage	PREDICTED: Vigna unguiculata mediator of RNA polymerase II transcription subunit 12-like (LOC114184889), transcript variant X2, mRNA	1	Mediator of RNA polymerase II transcription subunit 12	DEO72_LG10g2680	NA	GO:0003712~transcription cofactor activity	GO:0006357~regulation of transcription from RNA polymerase II promoter	GO:0016592~mediator complex
vun-miR167c-5p	XM_028072274.1	2.5	-1	1	21	245	265	UGAAGCUGCCAGCAUGAUCUA	GGUAUCAUGCUGGCAGCUGCA	Cleavage	PREDICTED: Vigna unguiculata mediator of RNA polymerase II transcription subunit 12-like (LOC114184889), transcript variant X3, mRNA	1	Mediator of RNA polymerase II transcription subunit 12	DEO72_LG10g2680	NA	GO:0003712~transcription cofactor activity	GO:0006357~regulation of transcription from RNA polymerase II promoter	GO:0016592~mediator complex
vun-miR167c-5p	XM_028072275.1	2.5	-1	1	21	15	35	UGAAGCUGCCAGCAUGAUCUA	GGUAUCAUGCUGGCAGCUGCA	Cleavage	PREDICTED: Vigna unguiculata mediator of RNA polymerase II transcription subunit 12-like (LOC114184889), transcript variant X4, mRNA	1	Mediator of RNA polymerase II transcription subunit 12	DEO72_LG10g2680	NA	GO:0003712~transcription cofactor activity	GO:0006357~regulation of transcription from RNA polymerase II promoter	GO:0016592~mediator complex
vun-miR167c-5p	XM_028073595.1	3.5	-1	1	21	1327	1347	UGAAGCUGCCAGCAUGAUCUA	AGGAUCAUGCUGUCACUUUCA	Cleavage	PREDICTED: Vigna unguiculata uncharacterized protein At5g02240-like (LOC114185717), mRNA	1	Nucleoside-diphosphate-sugar epimerase	DEO72_LG10g2976	NA	NA	NA	GO:0016021~integral component of membrane
vun-miR167c-5p	XM_028073625.1	5	-1	1	21	1427	1447	UGAAGCUGCCAGCAUGAUCUA	GAGAUAAUGCUUGCAGCUUAC	Translation	PREDICTED: Vigna unguiculata probable terpene synthase 11 (LOC114185740), mRNA	1	Linalool synthase	DEO72_LG10g807	NA	GO:0000287~magnesium ion binding;GO:0010333~terpene synthase activity	NA	NA
vun-miR167c-5p	XM_028073670.1	4.5	-1	1	21	928	948	UGAAGCUGCCAGCAUGAUCUA	CAGAUCAUGCUGGUGGACUUA	Cleavage	PREDICTED: Vigna unguiculata RCC1 domain-containing protein RUG3, mitochondrial (LOC114185766), mRNA	1	Regulator of chromosome condensation 1/beta-lactamase-inhibitor protein II	DEO72_LG10g2554	NA	NA	NA	NA
vun-miR167c-5p	XM_028074265.1	2	-1	1	21	778	798	UGAAGCUGCCAGCAUGAUCUA	UCGAUUAUGCUGGUGGCUUCG	Cleavage	PREDICTED: Vigna unguiculata ammonium transporter 3 member 3-like (LOC114186225), mRNA	1	Ammonium transporter	DEO72_LG2g2451	Transporters [02000]	GO:0008519~ammonium transmembrane transporter activity	NA	GO:0016021~integral component of membrane
vun-miR167c-5p	XM_028074877.1	4.5	-1	1	21	2377	2397	UGAAGCUGCCAGCAUGAUCUA	GGUGACAUGGUGGCAGCUUCA	Cleavage	PREDICTED: Vigna unguiculata neutral ceramidase 1-like (LOC114186833), mRNA	1	Neutral ceramidase (EC 3.5.1.23)	DEO72_LG1g1698	Sphingolipid metabolism [00600]	GO:0017040~ceramidase activity	GO:0046514~ceramide catabolic process	NA
vun-miR167c-5p	XM_028075110.1	4.5	-1	1	21	3003	3023	UGAAGCUGCCAGCAUGAUCUA	CAUCUCAUGUUGGCAGCUCUA	Cleavage	PREDICTED: Vigna unguiculata uncharacterized LOC114187010 (LOC114187010), transcript variant X1, mRNA	1	DNA polymerase sigma subunit	DEO72_LG1g1164	NA	GO:0016779~nucleotidyltransferase activity	NA	NA
vun-miR167c-5p	XM_028075111.1	4.5	-1	1	21	3003	3023	UGAAGCUGCCAGCAUGAUCUA	CAUCUCAUGUUGGCAGCUCUA	Cleavage	PREDICTED: Vigna unguiculata uncharacterized LOC114187010 (LOC114187010), transcript variant X2, mRNA	1	DNA polymerase sigma subunit	DEO72_LG1g1164	NA	GO:0016779~nucleotidyltransferase activity	NA	NA
vun-miR167c-5p	XM_028075841.1	5	-1	1	21	810	830	UGAAGCUGCCAGCAUGAUCUA	UAGGUGGUGCUGUCAGCUUAA	Cleavage	PREDICTED: Vigna unguiculata protein NRT1/ PTR FAMILY 4.6-like (LOC114187566), mRNA	1	Solute carrier family 15	DEO72_LG1g537	NA	GO:0022857~transmembrane transporter activity	NA	GO:0016021~integral component of membrane
vun-miR167c-5p	XM_028076025.1	3.5	-1	1	21	3263	3283	UGAAGCUGCCAGCAUGAUCUA	GAGAUCAGGCUGGCAGCUUGU	Cleavage	PREDICTED: Vigna unguiculata auxin response factor 6-like (LOC114187706), mRNA	1	Auxin response factor	DEO72_LG1g572	NA	GO:0003677~DNA binding	GO:0006355~regulation of transcription, DNA-templated;GO:0009734~auxin-activated signaling pathway	GO:0005634~nucleus
vun-miR167c-5p	XM_028076341.1	5	-1	1	21	2770	2790	UGAAGCUGCCAGCAUGAUCUA	UAGAUCGACCUGGCAACUUCG	Cleavage	PREDICTED: Vigna unguiculata SAC3 family protein B (LOC114187921), mRNA	1	PCI domain-containing protein	DEO72_LG1g673	NA	NA	NA	NA
vun-miR167c-5p	XM_028076606.1	3.5	-1	1	21	2778	2798	UGAAGCUGCCAGCAUGAUCUA	UAGAUCAGGCUGGCAGCUUGU	Cleavage	PREDICTED: Vigna unguiculata auxin response factor 8-like (LOC114188087), mRNA	1	Auxin response factor	DEO72_LG1g1592	NA	GO:0003677~DNA binding	GO:0006355~regulation of transcription, DNA-templated;GO:0009734~auxin-activated signaling pathway	GO:0005634~nucleus
vun-miR167c-5p	XM_028076996.1	4	-1	1	21	3865	3885	UGAAGCUGCCAGCAUGAUCUA	GUGAUCAUGCUGUUGGGUUCA	Cleavage	PREDICTED: Vigna unguiculata uncharacterized LOC114188408 (LOC114188408), mRNA	2	Somatic embryogenesis receptor kinase 1	DEO72_LG1g2910	NA	GO:0004672~protein kinase activity;GO:0005524~ATP binding	NA	NA
vun-miR167c-5p	XM_028076996.1	5	-1	1	21	2482	2502	UGAAGCUGCCAGCAUGAUCUA	GUGGUCAUGCUGUUGGGUUUA	Cleavage	PREDICTED: Vigna unguiculata uncharacterized LOC114188408 (LOC114188408), mRNA	2	Somatic embryogenesis receptor kinase 1	DEO72_LG1g2910	NA	GO:0004672~protein kinase activity;GO:0005524~ATP binding	NA	NA
vun-miR167c-5p	XM_028076997.1	5	-1	1	21	1046	1065	UGAAGCUGCCAGCAUGAUCUA	AAGAUCAUGUUGGU-GCUUCU	Cleavage	PREDICTED: Vigna unguiculata zinc finger protein 572-like (LOC114188409), mRNA	1	Uncharacterized protein	DEO72_LG1g2911	NA	GO:0003676~nucleic acid binding	NA	NA
vun-miR167c-5p	XM_028077541.1	4.5	-1	1	21	508	528	UGAAGCUGCCAGCAUGAUCUA	UUUCUUGUGCUGACAGCUUCA	Cleavage	PREDICTED: Vigna unguiculata uncharacterized LOC114188882 (LOC114188882), mRNA	1	Uncharacterized protein	DEO72_LG1g1504	NA	NA	NA	NA
vun-miR167c-5p	XM_028077592.1	3.5	-1	1	21	126	146	UGAAGCUGCCAGCAUGAUCUA	GUGGUUUUGCUGGCAGCAUCA	Cleavage	PREDICTED: Vigna unguiculata peroxidase A2-like (LOC114188922), mRNA	1	Peroxidase (EC 1.11.1.7)	DEO72_LG1g978	Phenylpropanoid biosynthesis [00940]	GO:0004601~peroxidase activity;GO:0020037~heme binding;GO:0046872~metal ion binding	GO:0006979~response to oxidative stress;GO:0042744~hydrogen peroxide catabolic process	NA
vun-miR167c-5p	XM_028077962.1	4.5	-1	1	21	541	561	UGAAGCUGCCAGCAUGAUCUA	CAGGUCGUGCUCGUGGCUUUG	Translation	PREDICTED: Vigna unguiculata heterogeneous nuclear ribonucleoprotein 1-like (LOC114189242), transcript variant X1, mRNA	1	Uncharacterized protein	Vigan.05G206900 VIGAN_05206900	mRNA surveillance pathway [03015]; Messenger RNA biogenesis [03019]	GO:0003723~RNA binding	NA	NA
vun-miR167c-5p	XM_028077963.1	4.5	-1	1	21	550	570	UGAAGCUGCCAGCAUGAUCUA	CAGGUCGUGCUCGUGGCUUUG	Translation	PREDICTED: Vigna unguiculata heterogeneous nuclear ribonucleoprotein 1-like (LOC114189242), transcript variant X2, mRNA	1	Uncharacterized protein	Vigan.05G206900 VIGAN_05206900	mRNA surveillance pathway [03015]; Messenger RNA biogenesis [03019]	GO:0003723~RNA binding	NA	NA
vun-miR167c-5p	XM_028078466.1	4	-1	1	21	1209	1229	UGAAGCUGCCAGCAUGAUCUA	AUGAUUAUGUUGGCACUUUUG	Cleavage	PREDICTED: Vigna unguiculata serine carboxypeptidase-like 27 (LOC114189779), mRNA	2	Carboxypeptidase (EC 3.4.16.-)	DEO72_LG9g2983	Peptidases and inhibitors [01002]	GO:0004185~serine-type carboxypeptidase activity;GO:0016829~lyase activity	NA	GO:0016021~integral component of membrane
vun-miR167c-5p	XM_028078466.1	5	-1	1	21	158	178	UGAAGCUGCCAGCAUGAUCUA	AUAAAUAUGUUGUCAGCUUUA	Cleavage	PREDICTED: Vigna unguiculata serine carboxypeptidase-like 27 (LOC114189779), mRNA	2	Carboxypeptidase (EC 3.4.16.-)	DEO72_LG9g2983	Peptidases and inhibitors [01002]	GO:0004185~serine-type carboxypeptidase activity;GO:0016829~lyase activity	NA	GO:0016021~integral component of membrane
vun-miR167c-5p	XM_028078593.1	4	-1	1	21	164	184	UGAAGCUGCCAGCAUGAUCUA	GCGAUCGUGGUGGCGGAUUCA	Cleavage	PREDICTED: Vigna unguiculata proteasome subunit beta type-2-A (LOC114189872), mRNA	1	Proteasome subunit beta (EC 3.4.25.1)	LR48_Vigan02g273100	Peptidases and inhibitors [01002]; Proteasome [03050]; Proteasome [03051]	GO:0004298~threonine-type endopeptidase activity	GO:0051603~proteolysis involved in cellular protein catabolic process	GO:0005634~nucleus;GO:0005737~cytoplasm;GO:0005839~proteasome core complex
vun-miR167c-5p	XM_028079057.1	5	-1	1	21	2321	2341	UGAAGCUGCCAGCAUGAUCUA	UGGAUUUUGCUGGUAGUUUGG	Cleavage	PREDICTED: Vigna unguiculata exocyst complex component SEC5A-like (LOC114190248), transcript variant X1, mRNA	1	Exocyst complex component SEC5	DEO72_LG9g3027	Membrane trafficking [04131]	NA	GO:0006887~exocytosis;GO:0006893~Golgi to plasma membrane transport;GO:0015031~protein transport	GO:0000145~exocyst
vun-miR167c-5p	XM_028079058.1	5	-1	1	21	2324	2344	UGAAGCUGCCAGCAUGAUCUA	UGGAUUUUGCUGGUAGUUUGG	Cleavage	PREDICTED: Vigna unguiculata exocyst complex component SEC5A-like (LOC114190248), transcript variant X2, mRNA	1	Exocyst complex component SEC5	DEO72_LG9g3027	Membrane trafficking [04131]	NA	GO:0006887~exocytosis;GO:0006893~Golgi to plasma membrane transport;GO:0015031~protein transport	GO:0000145~exocyst
vun-miR167c-5p	XM_028079514.1	4.5	-1	1	21	1400	1420	UGAAGCUGCCAGCAUGAUCUA	AAGUUCAUUUUGGCAGAUUCA	Cleavage	PREDICTED: Vigna unguiculata ethylene-responsive transcription factor 1B-like (LOC114190571), mRNA	2	Ethylene-responsive transcription factor 1	DEO72_LG9g1424	MAPK signaling pathway - plant [04016]; Plant hormone signal transduction [04075]; Transcription factors [03000]	GO:0003677~DNA binding;GO:0003700~sequence-specific DNA binding transcription factor activity	NA	GO:0005634~nucleus
vun-miR167c-5p	XM_028079514.1	5	-1	1	21	1107	1127	UGAAGCUGCCAGCAUGAUCUA	AAAUUCAUGCUGGCACCUACA	Cleavage	PREDICTED: Vigna unguiculata ethylene-responsive transcription factor 1B-like (LOC114190571), mRNA	2	Ethylene-responsive transcription factor 1	DEO72_LG9g1424	MAPK signaling pathway - plant [04016]; Plant hormone signal transduction [04075]; Transcription factors [03000]	GO:0003677~DNA binding;GO:0003700~sequence-specific DNA binding transcription factor activity	NA	GO:0005634~nucleus
vun-miR167c-5p	XM_028079868.1	5	-1	1	21	2102	2122	UGAAGCUGCCAGCAUGAUCUA	UGGGUUGUGCUAGUAGUUUUG	Translation	PREDICTED: Vigna unguiculata uncharacterized LOC114190819 (LOC114190819), mRNA	1	Uncharacterized protein	DEO72_LG9g2687	NA	NA	NA	NA
vun-miR167c-5p	XM_028079957.1	4.5	-1	1	21	1175	1195	UGAAGCUGCCAGCAUGAUCUA	UGGAUCCCGCUGACAGCUUUG	Cleavage	PREDICTED: Vigna unguiculata 3-oxoacyl-[acyl-carrier-protein] reductase FabG-like (LOC114190886), mRNA	1	Short-chain dehydrogenase/reductase	DEO72_LG9g492	NA	GO:0016491~oxidoreductase activity	NA	NA
vun-miR167c-5p	XM_028080145.1	3.5	-1	1	21	727	747	UGAAGCUGCCAGCAUGAUCUA	UGGACCAUGCUGGGAGCUUUG	Cleavage	PREDICTED: Vigna unguiculata G-type lectin S-receptor-like serine/threonine-protein kinase At5g24080 (LOC114191015), transcript variant X1, mRNA	1	Receptor-like serine/threonine-protein kinase (EC 2.7.11.1)	DEO72_LG9g3156	NA	GO:0004674~protein serine/threonine kinase activity;GO:0005524~ATP binding	GO:0048544~recognition of pollen	GO:0016021~integral component of membrane
vun-miR167c-5p	XM_028080146.1	3.5	-1	1	21	597	617	UGAAGCUGCCAGCAUGAUCUA	UGGACCAUGCUGGGAGCUUUG	Cleavage	PREDICTED: Vigna unguiculata G-type lectin S-receptor-like serine/threonine-protein kinase At5g24080 (LOC114191015), transcript variant X2, mRNA	1	Receptor-like serine/threonine-protein kinase (EC 2.7.11.1)	DEO72_LG9g3156	NA	GO:0004674~protein serine/threonine kinase activity;GO:0005524~ATP binding	GO:0048544~recognition of pollen	GO:0016021~integral component of membrane
vun-miR167c-5p	XM_028080411.1	3.5	-1	1	21	1619	1639	UGAAGCUGCCAGCAUGAUCUA	UUGGUGAUGUUUGCAGCUUCA	Translation	PREDICTED: Vigna unguiculata autophagy-related protein 9-like (LOC114191237), mRNA	1	Autophagy-related protein 9	DEO72_LG9g1897	Transporters [02000]; Mitochondrial biogenesis [03029]; Autophagy - other [04136]; Membrane trafficking [04131]	NA	GO:0006914~autophagy;GO:0015031~protein transport	GO:0005794~Golgi apparatus;GO:0016021~integral component of membrane;GO:0030659~cytoplasmic vesicle membrane
vun-miR167c-5p	XM_028080592.1	5	-1	1	21	731	751	UGAAGCUGCCAGCAUGAUCUA	CUGAUUGUGUUGGUAGUUUGG	Cleavage	PREDICTED: Vigna unguiculata uncharacterized LOC114191420 (LOC114191420), mRNA	1	Uncharacterized protein	DEO72_LG9g3414	NA	NA	NA	GO:0016021~integral component of membrane
vun-miR167c-5p	XM_028080733.1	4.5	-1	1	21	1200	1220	UGAAGCUGCCAGCAUGAUCUA	GAUUUUAUUCUGGCAGUUUCA	Cleavage	PREDICTED: Vigna unguiculata uncharacterized LOC114191521 (LOC114191521), mRNA	1	Uncharacterized protein	DEO72_LG9g438	NA	NA	NA	NA
vun-miR167c-5p	XM_028081455.1	4	-1	1	21	905	925	UGAAGCUGCCAGCAUGAUCUA	GCGAUCAUGGUGGCUGCUUCU	Cleavage	PREDICTED: Vigna unguiculata probable mediator of RNA polymerase II transcription subunit 26b (LOC114191974), mRNA	1	Transcription factor IIS	DEO72_LG9g562	NA	NA	NA	GO:0005634~nucleus
vun-miR167c-5p	XM_028081608.1	4.5	-1	1	21	1899	1919	UGAAGCUGCCAGCAUGAUCUA	GAGAUCAUGCUGGUAAUGUUA	Cleavage	PREDICTED: Vigna unguiculata LEAF RUST 10 DISEASE-RESISTANCE LOCUS RECEPTOR-LIKE PROTEIN KINASE-like 1.1 (LOC114192053), mRNA	1	Interleukin-1 receptor-associated kinase 4	DEO72_LG9g3622	NA	GO:0004672~protein kinase activity;GO:0005524~ATP binding	NA	GO:0016021~integral component of membrane
vun-miR167c-5p	XM_028082062.1	5	-1	1	21	810	830	UGAAGCUGCCAGCAUGAUCUA	GAGAUCAUGCUUGCGGUUUGG	Translation	PREDICTED: Vigna unguiculata FT-interacting protein 1 (LOC114192362), transcript variant X1, mRNA	1	Phosphatidylserine decarboxylase	DEO72_LG9g215	NA	NA	NA	GO:0016021~integral component of membrane
vun-miR167c-5p	XM_028082063.1	5	-1	1	21	892	912	UGAAGCUGCCAGCAUGAUCUA	GAGAUCAUGCUUGCGGUUUGG	Translation	PREDICTED: Vigna unguiculata FT-interacting protein 1 (LOC114192362), transcript variant X2, mRNA	1	Phosphatidylserine decarboxylase	DEO72_LG9g215	NA	NA	NA	GO:0016021~integral component of membrane
vun-miR167c-5p	XM_028082101.1	5	-1	1	21	667	687	UGAAGCUGCCAGCAUGAUCUA	UAGCUGAUCUUGGUAGCUUUA	Cleavage	PREDICTED: Vigna unguiculata auxin-responsive protein SAUR19-like (LOC114192394), mRNA	1	SAUR family protein	DEO72_LG9g865	Plant hormone signal transduction [04075]	NA	GO:0009733~response to auxin	NA
vun-miR167c-5p	XM_028082968.1	5	-1	1	21	1325	1345	UGAAGCUGCCAGCAUGAUCUA	UAGAUCAUGUUUGUAGAUUCU	Translation	PREDICTED: Vigna unguiculata uncharacterized LOC114193246 (LOC114193246), mRNA	1	uncharacterized protein LOC106763976	LOC106763976	NA	NA	NA	NA
vun-miR167c-5p	XM_028083098.1	4.5	-1	1	21	1351	1373	UGAAGCUGCCAGCA--UGAUCUA	GAGAUCAAGUGCUGGAAGCUUUA	Cleavage	PREDICTED: Vigna unguiculata putative tRNA pseudouridine synthase (LOC114193347), transcript variant X1, mRNA	1	tRNA pseudouridine synthase A	DEO72_LG7g2331	Transfer RNA biogenesis [03016]	GO:0003723~RNA binding;GO:0009982~pseudouridine synthase activity	GO:0031119~tRNA pseudouridine synthesis	GO:0016021~integral component of membrane
vun-miR167c-5p	XM_028083099.1	4.5	-1	1	21	1348	1370	UGAAGCUGCCAGCA--UGAUCUA	GAGAUCAAGUGCUGGAAGCUUUA	Cleavage	PREDICTED: Vigna unguiculata putative tRNA pseudouridine synthase (LOC114193347), transcript variant X2, mRNA	1	tRNA pseudouridine synthase A	DEO72_LG7g2331	Transfer RNA biogenesis [03016]	GO:0003723~RNA binding;GO:0009982~pseudouridine synthase activity	GO:0031119~tRNA pseudouridine synthesis	GO:0016021~integral component of membrane
vun-miR167c-5p	XM_028083755.1	3.5	-1	1	21	2886	2906	UGAAGCUGCCAGCAUGAUCUA	UAGAUCAGGCUGGCAGCUUGU	Cleavage	PREDICTED: Vigna unguiculata auxin response factor 8-like (LOC114193813), transcript variant X1, mRNA	1	Auxin response factor	DEO72_LG7g2406	NA	GO:0003677~DNA binding	GO:0006355~regulation of transcription, DNA-templated;GO:0009734~auxin-activated signaling pathway	GO:0005634~nucleus
vun-miR167c-5p	XM_028083756.1	3.5	-1	1	21	2244	2264	UGAAGCUGCCAGCAUGAUCUA	UAGAUCAGGCUGGCAGCUUGU	Cleavage	PREDICTED: Vigna unguiculata auxin response factor 8-like (LOC114193813), transcript variant X2, mRNA	1	Auxin response factor	DEO72_LG7g2406	NA	GO:0003677~DNA binding	GO:0006355~regulation of transcription, DNA-templated;GO:0009734~auxin-activated signaling pathway	GO:0005634~nucleus
vun-miR167c-5p	XM_028083848.1	3.5	-1	1	21	2899	2919	UGAAGCUGCCAGCAUGAUCUA	GAGAUCAGGCUGGCAGCUUGU	Cleavage	PREDICTED: Vigna unguiculata auxin response factor 6-like (LOC114193879), mRNA	1	Auxin response factor	DEO72_LG7g2918	NA	GO:0003677~DNA binding	GO:0006355~regulation of transcription, DNA-templated;GO:0009734~auxin-activated signaling pathway	GO:0005634~nucleus
vun-miR167c-5p	XM_028084334.1	4	-1	1	21	4693	4713	UGAAGCUGCCAGCAUGAUCUA	CACGUGAUGCUGGCAGCUUGA	Cleavage	PREDICTED: Vigna unguiculata uncharacterized LOC114194222 (LOC114194222), transcript variant X1, mRNA	1	DNA mismatch repair protein MSH6	DEO72_LG7g843	NA	NA	NA	NA
vun-miR167c-5p	XM_028084335.1	4	-1	1	21	4444	4464	UGAAGCUGCCAGCAUGAUCUA	CACGUGAUGCUGGCAGCUUGA	Cleavage	PREDICTED: Vigna unguiculata uncharacterized LOC114194222 (LOC114194222), transcript variant X2, mRNA	1	DNA mismatch repair protein MSH6	DEO72_LG7g843	NA	NA	NA	NA
vun-miR167c-5p	XM_028084557.1	5	-1	1	21	1775	1795	UGAAGCUGCCAGCAUGAUCUA	CAGGUUAUGUUGGUGGUUAUA	Cleavage	PREDICTED: Vigna unguiculata heterogeneous nuclear ribonucleoprotein 1 (LOC114194378), transcript variant X1, mRNA	1	Uncharacterized protein	LR48_Vigan07g004000	mRNA surveillance pathway [03015]; Messenger RNA biogenesis [03019]	GO:0003723~RNA binding	NA	NA
vun-miR167c-5p	XM_028084558.1	5	-1	1	21	1815	1835	UGAAGCUGCCAGCAUGAUCUA	CAGGUUAUGUUGGUGGUUAUA	Cleavage	PREDICTED: Vigna unguiculata heterogeneous nuclear ribonucleoprotein 1 (LOC114194378), transcript variant X2, mRNA	1	Uncharacterized protein	LR48_Vigan07g004000	mRNA surveillance pathway [03015]; Messenger RNA biogenesis [03019]	GO:0003723~RNA binding	NA	NA
vun-miR167c-5p	XM_028084559.1	5	-1	1	21	1652	1672	UGAAGCUGCCAGCAUGAUCUA	CAGGUUAUGUUGGUGGUUAUA	Cleavage	PREDICTED: Vigna unguiculata heterogeneous nuclear ribonucleoprotein 1 (LOC114194378), transcript variant X3, mRNA	1	Uncharacterized protein	LR48_Vigan07g004000	mRNA surveillance pathway [03015]; Messenger RNA biogenesis [03019]	GO:0003723~RNA binding	NA	NA
vun-miR167c-5p	XM_028086476.1	4	-1	1	21	693	713	UGAAGCUGCCAGCAUGAUCUA	GACAUCAUAUUGGCAGUUUUA	Cleavage	PREDICTED: Vigna unguiculata pumilio homolog 6, chloroplastic-like (LOC114196005), mRNA	1	PUM-HD domain-containing protein	DEO72_LG11g435	NA	GO:0003723~RNA binding	NA	NA
vun-miR167c-5p	XM_028086704.1	4.5	-1	1	21	390	410	UGAAGCUGCCAGCAUGAUCUA	GAGGUUAUGUUGGUGGUUUUU	Cleavage	PREDICTED: Vigna unguiculata uncharacterized LOC114196153 (LOC114196153), mRNA	1	Uncharacterized protein	DEO72_LG11g319	NA	NA	NA	NA
vun-miR167c-5p	XR_003599476.1	5	-1	1	21	632	652	UGAAGCUGCCAGCAUGAUCUA	UACGUGGUGCUGGUGGCUUCU	Cleavage	PREDICTED: Vigna unguiculata enoyl-CoA hydratase 2, peroxisomal (LOC114164056), transcript variant X3, misc_RNA	1	NA	NA	NA	NA	NA	NA
vun-miR167c-5p	XR_003600781.1	3.5	-1	1	21	645	665	UGAAGCUGCCAGCAUGAUCUA	GAGGUUUUGUUGGUAGCUUUA	Cleavage	PREDICTED: Vigna unguiculata uncharacterized LOC114168865 (LOC114168865), ncRNA	1	NA	NA	NA	NA	NA	NA
vun-miR167c-5p	XR_003602521.1	4	-1	1	21	773	792	UGAAGCUGCCAGCAUGAUCUA	UGGAUCAUGUUGGC-GCUUUA	Cleavage	PREDICTED: Vigna unguiculata cleavage and polyadenylation specificity factor subunit 3-II (LOC114173570), transcript variant X4, misc_RNA	1	NA	NA	NA	NA	NA	NA
vun-miR167c-5p	XR_003602907.1	5	-1	1	21	687	706	UGAAGCUGCCAGCAUGAUCUA	CAGGUCAU-CUUGCAGCUUCA	Translation	PREDICTED: Vigna unguiculata uncharacterized LOC114175779 (LOC114175779), ncRNA	1	NA	NA	NA	NA	NA	NA
vun-miR167c-5p	XR_003603550.1	3.5	-1	1	21	2043	2063	UGAAGCUGCCAGCAUGAUCUA	CUGAUUAUGUUGGCAGCUUGG	Cleavage	PREDICTED: Vigna unguiculata GPI ethanolamine phosphate transferase 3 (LOC114179924), transcript variant X2, misc_RNA	1	NA	NA	NA	NA	NA	NA
vun-miR167c-5p	XR_003605583.1	4.5	-1	1	21	541	561	UGAAGCUGCCAGCAUGAUCUA	CAGGUCGUGCUCGUGGCUUUG	Translation	PREDICTED: Vigna unguiculata heterogeneous nuclear ribonucleoprotein 1-like (LOC114189242), transcript variant X3, misc_RNA	1	NA	NA	NA	NA	NA	NA
vun-miR167c-5p	XR_003605584.1	4.5	-1	1	21	541	561	UGAAGCUGCCAGCAUGAUCUA	CAGGUCGUGCUCGUGGCUUUG	Translation	PREDICTED: Vigna unguiculata heterogeneous nuclear ribonucleoprotein 1-like (LOC114189242), transcript variant X4, misc_RNA	1	NA	NA	NA	NA	NA	NA
vun-miR167c-5p	XR_003605585.1	4.5	-1	1	21	541	561	UGAAGCUGCCAGCAUGAUCUA	CAGGUCGUGCUCGUGGCUUUG	Translation	PREDICTED: Vigna unguiculata heterogeneous nuclear ribonucleoprotein 1-like (LOC114189242), transcript variant X5, misc_RNA	1	NA	NA	NA	NA	NA	NA
vun-miR167c-5p	XR_003605847.1	4.5	-1	1	21	459	478	UGAAGCUGCCAGCAUGAUCUA	CAGAUCAUG-UGGCUGCUUCA	Cleavage	PREDICTED: Vigna unguiculata uncharacterized LOC114190772 (LOC114190772), transcript variant X1, ncRNA	1	NA	NA	NA	NA	NA	NA
vun-miR167c-5p	XR_003605848.1	4.5	-1	1	21	457	476	UGAAGCUGCCAGCAUGAUCUA	CAGAUCAUG-UGGCUGCUUCA	Cleavage	PREDICTED: Vigna unguiculata uncharacterized LOC114190772 (LOC114190772), transcript variant X2, ncRNA	1	NA	NA	NA	NA	NA	NA
vun-miR169a-5p	XM_028047097.1	4	-1	1	21	4317	4337	CAGCCAAGGAUGACUUGCCGG	AGGGGAAGUCAUCAUUGGGUG	Cleavage	PREDICTED: Vigna unguiculata uncharacterized LOC114163046 (LOC114163046), transcript variant X1, mRNA	1	Transcription factor IIS	DEO72_LG11g1185	NA	GO:0003682~chromatin binding	NA	GO:0005634~nucleus
vun-miR169a-5p	XM_028047098.1	4	-1	1	21	4351	4371	CAGCCAAGGAUGACUUGCCGG	AGGGGAAGUCAUCAUUGGGUG	Cleavage	PREDICTED: Vigna unguiculata uncharacterized LOC114163046 (LOC114163046), transcript variant X2, mRNA	1	Transcription factor IIS	DEO72_LG11g1185	NA	GO:0003682~chromatin binding	NA	GO:0005634~nucleus
vun-miR169a-5p	XM_028047168.1	4.5	-1	1	21	1888	1908	CAGCCAAGGAUGACUUGCCGG	CUGGCAUGUCUUGCUUGGUUG	Translation	PREDICTED: Vigna unguiculata 1,4-alpha-glucan-branching enzyme 1, chloroplastic/amyloplastic-like (LOC114163090), mRNA	1	1,4-alpha-glucan branching enzyme	DEO72_LG11g3775	Starch and sucrose metabolism [00500]; Exosome [04147]	GO:0003844~1,4-alpha-glucan branching enzyme activity;GO:0004553~hydrolase activity, hydrolyzing O-glycosyl compounds;GO:0043169~cation binding	GO:0005978~glycogen biosynthetic process	NA
vun-miR169a-5p	XM_028048038.1	5	-1	1	21	455	475	CAGCCAAGGAUGACUUGCCGG	CUGGCAUGUCCUCCUUGGAUU	Translation	PREDICTED: Vigna unguiculata SWI/SNF complex subunit SWI3D-like (LOC114163745), mRNA	1	SWI/SNF related-matrix-associated actin-dependent regulator of chromatin subfamily C	DEO72_LG11g3830	Chromosome and associated proteins [03036]; Transcription machinery [03021]	GO:0003677~DNA binding	NA	GO:0016021~integral component of membrane
vun-miR169a-5p	XM_028048307.1	5	-1	1	21	484	504	CAGCCAAGGAUGACUUGCCGG	CUGGCAUGUCCUCCUUGGAUU	Translation	PREDICTED: Vigna unguiculata proline-rich receptor-like protein kinase PERK7 (LOC114163920), transcript variant X1, mRNA	1	Somatic embryogenesis receptor kinase 1	DEO72_LG11g3831	NA	GO:0004672~protein kinase activity;GO:0005524~ATP binding	NA	GO:0016021~integral component of membrane
vun-miR169a-5p	XM_028048308.1	5	-1	1	21	411	431	CAGCCAAGGAUGACUUGCCGG	CUGGCAUGUCCUCCUUGGAUU	Translation	PREDICTED: Vigna unguiculata proline-rich receptor-like protein kinase PERK7 (LOC114163920), transcript variant X2, mRNA	1	Somatic embryogenesis receptor kinase 1	DEO72_LG11g3831	NA	GO:0004672~protein kinase activity;GO:0005524~ATP binding	NA	GO:0016021~integral component of membrane
vun-miR169a-5p	XM_028048309.1	5	-1	1	21	484	504	CAGCCAAGGAUGACUUGCCGG	CUGGCAUGUCCUCCUUGGAUU	Translation	PREDICTED: Vigna unguiculata proline-rich receptor-like protein kinase PERK7 (LOC114163920), transcript variant X3, mRNA	1	Somatic embryogenesis receptor kinase 1	DEO72_LG11g3831	NA	GO:0004672~protein kinase activity;GO:0005524~ATP binding	NA	GO:0016021~integral component of membrane
vun-miR169a-5p	XM_028048310.1	5	-1	1	21	484	504	CAGCCAAGGAUGACUUGCCGG	CUGGCAUGUCCUCCUUGGAUU	Translation	PREDICTED: Vigna unguiculata proline-rich receptor-like protein kinase PERK7 (LOC114163920), transcript variant X4, mRNA	1	Somatic embryogenesis receptor kinase 1	DEO72_LG11g3831	NA	GO:0004672~protein kinase activity;GO:0005524~ATP binding	NA	GO:0016021~integral component of membrane
vun-miR169a-5p	XM_028048311.1	5	-1	1	21	484	504	CAGCCAAGGAUGACUUGCCGG	CUGGCAUGUCCUCCUUGGAUU	Translation	PREDICTED: Vigna unguiculata proline-rich receptor-like protein kinase PERK7 (LOC114163920), transcript variant X5, mRNA	1	Somatic embryogenesis receptor kinase 1	DEO72_LG11g3831	NA	GO:0004672~protein kinase activity;GO:0005524~ATP binding	NA	GO:0016021~integral component of membrane
vun-miR169a-5p	XM_028048312.1	5	-1	1	21	484	504	CAGCCAAGGAUGACUUGCCGG	CUGGCAUGUCCUCCUUGGAUU	Translation	PREDICTED: Vigna unguiculata proline-rich receptor-like protein kinase PERK7 (LOC114163920), transcript variant X6, mRNA	1	Somatic embryogenesis receptor kinase 1	DEO72_LG11g3831	NA	GO:0004672~protein kinase activity;GO:0005524~ATP binding	NA	GO:0016021~integral component of membrane
vun-miR169a-5p	XM_028048457.1	5	-1	1	21	1018	1038	CAGCCAAGGAUGACUUGCCGG	CCGGUUGAUUAUUCUUGGCUU	Cleavage	PREDICTED: Vigna unguiculata cellulose synthase A catalytic subunit 1 [UDP-forming] (LOC114164006), mRNA	1	Cellulose synthase (EC 2.4.1.12)	DEO72_LG11g3246	PATHWAY: Glycan metabolism; plant cellulose biosynthesis. {ECO:0000256|RuleBase:RU361116}.; Glycosyltransferases [01003]	GO:0016760~cellulose synthase (UDP-forming) activity;GO:0046872~metal ion binding	GO:0030244~cellulose biosynthetic process;GO:0071555~cell wall organization	GO:0005886~plasma membrane;GO:0016021~integral component of membrane
vun-miR169a-5p	XM_028048635.1	4.5	-1	1	21	1249	1269	CAGCCAAGGAUGACUUGCCGG	CUGGGCAGUUGGCCUUGGCUG	Translation	PREDICTED: Vigna unguiculata cyclin-H1-1-like (LOC114164111), transcript variant X1, mRNA	1	Uncharacterized protein	DEO72_LG11g2200	Membrane trafficking [04131]	NA	NA	NA
vun-miR169a-5p	XM_028048636.1	4.5	-1	1	21	1404	1424	CAGCCAAGGAUGACUUGCCGG	CUGGGCAGUUGGCCUUGGCUG	Translation	PREDICTED: Vigna unguiculata cyclin-H1-1-like (LOC114164111), transcript variant X2, mRNA	1	Uncharacterized protein	DEO72_LG11g2200	Membrane trafficking [04131]	NA	NA	NA
vun-miR169a-5p	XM_028048637.1	4.5	-1	1	21	1349	1369	CAGCCAAGGAUGACUUGCCGG	CUGGGCAGUUGGCCUUGGCUG	Translation	PREDICTED: Vigna unguiculata cyclin-H1-1-like (LOC114164111), transcript variant X3, mRNA	1	Uncharacterized protein	DEO72_LG11g2200	Membrane trafficking [04131]	NA	NA	NA
vun-miR169a-5p	XM_028048673.1	4.5	-1	1	21	281	301	CAGCCAAGGAUGACUUGCCGG	UUGGCAUGUCAUCCUCGCUUG	Cleavage	PREDICTED: Vigna unguiculata F-box protein SKIP5 (LOC114164133), transcript variant X1, mRNA	1	F-box domain-containing protein	DEO72_LG6g404	NA	NA	NA	NA
vun-miR169a-5p	XM_028048674.1	4	-1	1	21	302	322	CAGCCAAGGAUGACUUGCCGG	GUAACAAGUUAUCCUUCGCUG	Cleavage	PREDICTED: Vigna unguiculata chloroplast processing peptidase-like (LOC114164136), transcript variant X1, mRNA	1	chloroplast processing peptidase isoform X4	LOC106762448	Protein export [03060]; Peptidases and inhibitors [01002]	GO:0008236~serine-type peptidase activity	NA	GO:0016021~integral component of membrane
vun-miR169a-5p	XM_028048675.1	4	-1	1	21	302	322	CAGCCAAGGAUGACUUGCCGG	GUAACAAGUUAUCCUUCGCUG	Cleavage	PREDICTED: Vigna unguiculata chloroplast processing peptidase-like (LOC114164136), transcript variant X2, mRNA	1	chloroplast processing peptidase isoform X4	LOC106762448	Protein export [03060]; Peptidases and inhibitors [01002]	GO:0008236~serine-type peptidase activity	NA	GO:0016021~integral component of membrane
vun-miR169a-5p	XM_028048676.1	4	-1	1	21	302	322	CAGCCAAGGAUGACUUGCCGG	GUAACAAGUUAUCCUUCGCUG	Cleavage	PREDICTED: Vigna unguiculata chloroplast processing peptidase-like (LOC114164136), transcript variant X3, mRNA	1	chloroplast processing peptidase isoform X4	LOC106762448	Protein export [03060]; Peptidases and inhibitors [01002]	GO:0008236~serine-type peptidase activity	NA	GO:0016021~integral component of membrane
vun-miR169a-5p	XM_028048681.1	4.5	-1	1	21	281	301	CAGCCAAGGAUGACUUGCCGG	UUGGCAUGUCAUCCUCGCUUG	Cleavage	PREDICTED: Vigna unguiculata F-box protein SKIP5 (LOC114164133), transcript variant X2, mRNA	1	F-box domain-containing protein	DEO72_LG6g404	NA	NA	NA	NA
vun-miR169a-5p	XM_028048992.1	4	-1	1	21	2183	2203	CAGCCAAGGAUGACUUGCCGG	UAGGCAAAUUAUUCUUGGUAG	Cleavage	PREDICTED: Vigna unguiculata probable polygalacturonase (LOC114164354), mRNA	1	Galacturan 1	DEO72_LG11g2235	NA	GO:0004650~polygalacturonase activity	GO:0005975~carbohydrate metabolic process;GO:0071555~cell wall organization	GO:0005576~extracellular region;GO:0016021~integral component of membrane
vun-miR169a-5p	XM_028049014.1	4	-1	1	21	746	766	CAGCCAAGGAUGACUUGCCGG	CUGGUCAGUUGGCCUUGGCUG	Translation	PREDICTED: Vigna unguiculata cyclin-H1-1-like (LOC114164369), transcript variant X1, mRNA	1	Cyclin H	DEO72_LG11g2191	Transcription machinery [03021]; Basal transcription factors [03022]; DNA repair and recombination proteins [03400]; Nucleotide excision repair [03420]	NA	NA	NA
vun-miR169a-5p	XM_028049016.1	4	-1	1	21	746	766	CAGCCAAGGAUGACUUGCCGG	CUGGUCAGUUGGCCUUGGCUG	Translation	PREDICTED: Vigna unguiculata cyclin-H1-1-like (LOC114164369), transcript variant X2, mRNA	1	Cyclin H	DEO72_LG11g2191	Transcription machinery [03021]; Basal transcription factors [03022]; DNA repair and recombination proteins [03400]; Nucleotide excision repair [03420]	NA	NA	NA
vun-miR169a-5p	XM_028049017.1	4.5	-1	1	21	668	688	CAGCCAAGGAUGACUUGCCGG	GACUCAAGUUGGCCUUGGCUG	Translation	PREDICTED: Vigna unguiculata cyclin-H1-1-like (LOC114164369), transcript variant X3, mRNA	1	Cyclin H	DEO72_LG11g2191	Transcription machinery [03021]; Basal transcription factors [03022]; DNA repair and recombination proteins [03400]; Nucleotide excision repair [03420]	NA	NA	NA
vun-miR169a-5p	XM_028049525.1	4	-1	1	21	2092	2112	CAGCCAAGGAUGACUUGCCGG	UAGGUAAUCCAUCUUUGGUUG	Cleavage	PREDICTED: Vigna unguiculata uncharacterized LOC114164765 (LOC114164765), transcript variant X1, mRNA	1	RNA-binding protein 5/10	DEO72_LG11g1680	NA	GO:0003676~nucleic acid binding	NA	NA
vun-miR169a-5p	XM_028049526.1	4	-1	1	21	2038	2058	CAGCCAAGGAUGACUUGCCGG	UAGGUAAUCCAUCUUUGGUUG	Cleavage	PREDICTED: Vigna unguiculata uncharacterized LOC114164765 (LOC114164765), transcript variant X2, mRNA	1	RNA-binding protein 5/10	DEO72_LG11g1680	NA	GO:0003676~nucleic acid binding	NA	NA
vun-miR169a-5p	XM_028049527.1	4	-1	1	21	1855	1875	CAGCCAAGGAUGACUUGCCGG	UAGGUAAUCCAUCUUUGGUUG	Cleavage	PREDICTED: Vigna unguiculata uncharacterized LOC114164765 (LOC114164765), transcript variant X3, mRNA	1	RNA-binding protein 5/10	DEO72_LG11g1680	NA	GO:0003676~nucleic acid binding	NA	NA
vun-miR169a-5p	XM_028049869.1	5	-1	1	21	78	98	CAGCCAAGGAUGACUUGCCGG	AAUAGAAGUCAUUCUUGGUUA	Cleavage	PREDICTED: Vigna unguiculata uncharacterized LOC114165209 (LOC114165209), mRNA	1	Uncharacterized protein	TSUD_396570	NA	GO:0003676~nucleic acid binding;GO:0008270~zinc ion binding	GO:0015074~DNA integration	NA
vun-miR169a-5p	XM_028051222.1	4.5	-1	1	21	1591	1611	CAGCCAAGGAUGACUUGCCGG	CCUGGAAGUUGUUCUUGGCUC	Cleavage	PREDICTED: Vigna unguiculata uncharacterized LOC114166485 (LOC114166485), transcript variant X1, mRNA	1	CCHC-type domain-containing protein	KK1_041939	NA	GO:0003676~nucleic acid binding;GO:0008270~zinc ion binding	NA	NA
vun-miR169a-5p	XM_028051223.1	4.5	-1	1	21	1522	1542	CAGCCAAGGAUGACUUGCCGG	CCUGGAAGUUGUUCUUGGCUC	Cleavage	PREDICTED: Vigna unguiculata uncharacterized LOC114166485 (LOC114166485), transcript variant X3, mRNA	1	CCHC-type domain-containing protein	KK1_041939	NA	GO:0003676~nucleic acid binding;GO:0008270~zinc ion binding	NA	NA
vun-miR169a-5p	XM_028051224.1	4.5	-1	1	21	1655	1675	CAGCCAAGGAUGACUUGCCGG	CCUGGAAGUUGUUCUUGGCUC	Cleavage	PREDICTED: Vigna unguiculata uncharacterized LOC114166485 (LOC114166485), transcript variant X4, mRNA	1	CCHC-type domain-containing protein	KK1_041939	NA	GO:0003676~nucleic acid binding;GO:0008270~zinc ion binding	NA	NA
vun-miR169a-5p	XM_028051247.1	4.5	-1	1	21	893	913	CAGCCAAGGAUGACUUGCCGG	AAUCUGAGUCACCCUUGGCUG	Translation	PREDICTED: Vigna unguiculata zinc finger protein 3-like (LOC114166506), mRNA	1	C2H2-type domain-containing protein	DEO72_LG8g166	NA	GO:0003676~nucleic acid binding	NA	NA
vun-miR169a-5p	XM_028051355.1	2	-1	1	21	1468	1488	CAGCCAAGGAUGACUUGCCGG	UAGGGAAGUCAUCCUUGGCUC	Cleavage	PREDICTED: Vigna unguiculata nuclear transcription factor Y subunit A-3-like (LOC114166606), transcript variant X1, mRNA	1	Nuclear transcription factor Y	DEO72_LG8g430	Transcription factors [03000]	GO:0003677~DNA binding;GO:0003700~sequence-specific DNA binding transcription factor activity	NA	GO:0016602~CCAAT-binding factor complex
vun-miR169a-5p	XM_028051356.1	2	-1	1	21	1554	1574	CAGCCAAGGAUGACUUGCCGG	UAGGGAAGUCAUCCUUGGCUC	Cleavage	PREDICTED: Vigna unguiculata nuclear transcription factor Y subunit A-3-like (LOC114166606), transcript variant X2, mRNA	1	Nuclear transcription factor Y	DEO72_LG8g430	Transcription factors [03000]	GO:0003677~DNA binding;GO:0003700~sequence-specific DNA binding transcription factor activity	NA	GO:0016602~CCAAT-binding factor complex
vun-miR169a-5p	XM_028051357.1	2	-1	1	21	1382	1402	CAGCCAAGGAUGACUUGCCGG	UAGGGAAGUCAUCCUUGGCUC	Cleavage	PREDICTED: Vigna unguiculata nuclear transcription factor Y subunit A-3-like (LOC114166606), transcript variant X3, mRNA	1	Nuclear transcription factor Y	DEO72_LG8g430	Transcription factors [03000]	GO:0003677~DNA binding;GO:0003700~sequence-specific DNA binding transcription factor activity	NA	GO:0016602~CCAAT-binding factor complex
vun-miR169a-5p	XM_028052025.1	3	-1	1	21	1385	1405	CAGCCAAGGAUGACUUGCCGG	GCUCUAAGUCAUCCUUGGUUG	Cleavage	PREDICTED: Vigna unguiculata CDPK-related kinase 3 (LOC114167087), mRNA	1	Protein kinase	DEO72_LG8g528	NA	GO:0004672~protein kinase activity;GO:0005509~calcium ion binding;GO:0005524~ATP binding	NA	NA
vun-miR169a-5p	XM_028052432.1	4.5	-1	1	21	1353	1373	CAGCCAAGGAUGACUUGCCGG	UCGGCUAGUAAUCCUUGUUUG	Cleavage	PREDICTED: Vigna unguiculata aldehyde oxidase GLOX (LOC114167358), mRNA	1	Glutathione S-transferase	DEO72_LG8g2465	NA	GO:0016740~transferase activity	NA	NA
vun-miR169a-5p	XM_028053201.1	2.5	-1	1	21	1028	1048	CAGCCAAGGAUGACUUGCCGG	AAGGCAAAUCAUUCUUGGCUC	Cleavage	PREDICTED: Vigna unguiculata nuclear transcription factor Y subunit A-9-like (LOC114168407), transcript variant X1, mRNA	1	Nuclear transcription factor Y	DEO72_LG3g43	Transcription factors [03000]	GO:0003677~DNA binding;GO:0003700~sequence-specific DNA binding transcription factor activity	NA	GO:0016602~CCAAT-binding factor complex
vun-miR169a-5p	XM_028053202.1	2.5	-1	1	21	1159	1179	CAGCCAAGGAUGACUUGCCGG	AAGGCAAAUCAUUCUUGGCUC	Cleavage	PREDICTED: Vigna unguiculata nuclear transcription factor Y subunit A-9-like (LOC114168407), transcript variant X2, mRNA	1	Nuclear transcription factor Y	DEO72_LG3g43	Transcription factors [03000]	GO:0003677~DNA binding;GO:0003700~sequence-specific DNA binding transcription factor activity	NA	GO:0016602~CCAAT-binding factor complex
vun-miR169a-5p	XM_028053203.1	2.5	-1	1	21	1127	1147	CAGCCAAGGAUGACUUGCCGG	AAGGCAAAUCAUUCUUGGCUC	Cleavage	PREDICTED: Vigna unguiculata nuclear transcription factor Y subunit A-9-like (LOC114168407), transcript variant X3, mRNA	1	Nuclear transcription factor Y	DEO72_LG3g43	Transcription factors [03000]	GO:0003677~DNA binding;GO:0003700~sequence-specific DNA binding transcription factor activity	NA	GO:0016602~CCAAT-binding factor complex
vun-miR169a-5p	XM_028053695.1	4	-1	1	21	513	533	CAGCCAAGGAUGACUUGCCGG	GGGGGAAGUUUUCUUUGGUUG	Translation	PREDICTED: Vigna unguiculata putative pectinesterase/pectinesterase inhibitor 24 (LOC114168767), mRNA	1	Pectinesterase (EC 3.1.1.11)	DEO72_LG3g304	PATHWAY: Glycan metabolism; pectin degradation; 2-dehydro-3-deoxy-D-gluconate from pectin: step 1/5. {ECO:0000256|RuleBase:RU000589, ECO:0000256|SAAS:SAAS00560367}.	GO:0004857~enzyme inhibitor activity;GO:0030599~pectinesterase activity;GO:0045330~aspartyl esterase activity	GO:0042545~cell wall modification;GO:0045490~pectin catabolic process	GO:0005576~extracellular region;GO:0005618~cell wall;GO:0016021~integral component of membrane
vun-miR169a-5p	XM_028054643.1	3	-1	1	21	1338	1358	CAGCCAAGGAUGACUUGCCGG	UGGGUGAAUUAUCUUUGGCUG	Cleavage	PREDICTED: Vigna unguiculata aconitate hydratase, cytoplasmic-like (LOC114169481), transcript variant X1, mRNA	1	Aconitate hydratase (Aconitase) (EC 4.2.1.3)	DEO72_LG3g2470	Citrate cycle (TCA cycle) [00020]; Glyoxylate and dicarboxylate metabolism [00630]	GO:0003994~aconitate hydratase activity;GO:0047780~citrate dehydratase activity;GO:0051539~4 iron, 4 sulfur cluster binding	NA	NA
vun-miR169a-5p	XM_028054644.1	3	-1	1	21	776	796	CAGCCAAGGAUGACUUGCCGG	UGGGUGAAUUAUCUUUGGCUG	Cleavage	PREDICTED: Vigna unguiculata aconitate hydratase, cytoplasmic-like (LOC114169481), transcript variant X2, mRNA	1	Aconitate hydratase (Aconitase) (EC 4.2.1.3)	DEO72_LG3g2470	Citrate cycle (TCA cycle) [00020]; Glyoxylate and dicarboxylate metabolism [00630]	GO:0003994~aconitate hydratase activity;GO:0047780~citrate dehydratase activity;GO:0051539~4 iron, 4 sulfur cluster binding	NA	NA
vun-miR169a-5p	XM_028054660.1	4	-1	1	21	47	67	CAGCCAAGGAUGACUUGCCGG	AGAGCACGUCAACUUUGGCUG	Translation	PREDICTED: Vigna unguiculata glutathione S-transferase U17-like (LOC114169487), mRNA	1	Glutathione S-transferase	DEO72_LG4g1481	Transporters [02000]; Glutathione metabolism [00480]	GO:0016740~transferase activity	NA	NA
vun-miR169a-5p	XM_028055958.1	4	-1	1	21	699	720	CAGCCAAGGAUGACUUG-CCGG	CUGGUCAAGUUAUCUUUGGCUU	Cleavage	PREDICTED: Vigna unguiculata uncharacterized LOC114170470 (LOC114170470), mRNA	1	DsbD_2 domain-containing protein	DEO72_LG3g3238	NA	NA	NA	GO:0016021~integral component of membrane
vun-miR169a-5p	XM_028056082.1	3.5	-1	1	21	1021	1041	CAGCCAAGGAUGACUUGCCGG	CCGGCAAGCCAUUCUUGGCAG	Cleavage	PREDICTED: Vigna unguiculata UDP-glycosyltransferase 79B30-like (LOC114170574), mRNA	1	Glycosyltransferase (EC 2.4.1.-)	DEO72_LG3g752	Flavone and flavonol biosynthesis [00944]	GO:0016758~transferase activity, transferring hexosyl groups	NA	NA
vun-miR169a-5p	XM_028057529.1	3	-1	1	21	1220	1240	CAGCCAAGGAUGACUUGCCGG	AGAGCAAGUCAUGUUUGGCUG	Cleavage	PREDICTED: Vigna unguiculata transcription factor FAMA (LOC114173256), mRNA	1	BHLH domain-containing protein	Vigan.10G030500 VIGAN_10030500	NA	GO:0046983~protein dimerization activity	NA	NA
vun-miR169a-5p	XM_028058328.1	3.5	-1	1	21	2270	2290	CAGCCAAGGAUGACUUGCCGG	UGGGUUAUUUGUCCUUGGCUG	Cleavage	PREDICTED: Vigna unguiculata monosaccharide-sensing protein 2-like (LOC114173746), mRNA	1	MFS transporter	DEO72_LG4g2186	NA	GO:0022857~transmembrane transporter activity	NA	GO:0016021~integral component of membrane
vun-miR169a-5p	XM_028059684.1	5	-1	1	21	1307	1327	CAGCCAAGGAUGACUUGCCGG	CCAGCAAGUUAUCUUUUGCCG	Cleavage	PREDICTED: Vigna unguiculata pantothenate kinase 1 (LOC114174949), mRNA	1	Type II pantothenate kinase	DEO72_LG2g2629	Pantothenate and CoA biosynthesis [00770]	GO:0004594~pantothenate kinase activity;GO:0005524~ATP binding	GO:0015937~coenzyme A biosynthetic process	NA
vun-miR169a-5p	XM_028059698.1	4	-1	1	21	1311	1331	CAGCCAAGGAUGACUUGCCGG	GUGGCAACUCAUCCGAGGCUG	Cleavage	PREDICTED: Vigna unguiculata short-chain dehydrogenase TIC 32, chloroplastic (LOC114174962), mRNA	1	Retinol dehydrogenase 12	DEO72_LG2g5523	NA	NA	NA	NA
vun-miR169a-5p	XM_028059699.1	5	-1	1	21	1981	2001	CAGCCAAGGAUGACUUGCCGG	UUGGUAUGUUAUCUUUGGCAA	Cleavage	PREDICTED: Vigna unguiculata AAA-ATPase At3g50940-like (LOC114174963), mRNA	1	Mitochondrial chaperone BCS1	DEO72_LG2g2108	NA	GO:0005524~ATP binding	NA	NA
vun-miR169a-5p	XM_028061042.1	4.5	-1	1	21	216	236	CAGCCAAGGAUGACUUGCCGG	ACUUCAAGUCGUCUUUGCCUG	Cleavage	PREDICTED: Vigna unguiculata serine hydroxymethyltransferase, mitochondrial (LOC114176110), mRNA	1	Serine hydroxymethyltransferase, mitochondrial	T459_04516	One carbon pool by folate [00670]; Cyanoamino acid metabolism [00460]; Glycine, serine and threonine metabolism [00260]; Glyoxylate and dicarboxylate metabolism [00630]	GO:0004372~glycine hydroxymethyltransferase activity;GO:0008168~methyltransferase activity;GO:0030170~pyridoxal phosphate binding	GO:0019264~glycine biosynthetic process from serine;GO:0032259~methylation;GO:0035999~tetrahydrofolate interconversion	NA
vun-miR169a-5p	XM_028062365.1	4.5	-1	1	21	256	276	CAGCCAAGGAUGACUUGCCGG	UAGGCGAGUCAUGCUUGCCUU	Cleavage	PREDICTED: Vigna unguiculata calcium-transporting ATPase 12, plasma membrane-type-like (LOC114177112), mRNA	1	Calcium-transporting ATPase (EC 7.2.2.10)	DEO72_LG6g2385	Enzymes with EC numbers[99980]	GO:0005388~calcium-transporting ATPase activity;GO:0005524~ATP binding	NA	GO:0016021~integral component of membrane
vun-miR169a-5p	XM_028063775.1	4	-1	1	21	14	33	CAGCCAAGGAUGACUUGCCGG	CUGGCU-GUCAUCUUUGGUUG	Cleavage	PREDICTED: Vigna unguiculata monocopper oxidase-like protein SKU5 (LOC114178078), mRNA	1	Uncharacterized protein (Fragment)	CR513_32820	NA	NA	NA	NA
vun-miR169a-5p	XM_028063867.1	4.5	-1	1	21	2520	2540	CAGCCAAGGAUGACUUGCCGG	AAUGUAGGUUAUGUUUGGCUG	Cleavage	PREDICTED: Vigna unguiculata receptor-like protein kinase HSL1 (LOC114178137), mRNA	1	Serine/threonine kinase	DEO72_LG2g4768	NA	GO:0004674~protein serine/threonine kinase activity;GO:0005524~ATP binding	NA	GO:0016021~integral component of membrane
vun-miR169a-5p	XM_028064566.1	4	-1	1	21	2423	2443	CAGCCAAGGAUGACUUGCCGG	ACGGUGAGUCAGUUUUGGUUG	Translation	PREDICTED: Vigna unguiculata uncharacterized LOC114178572 (LOC114178572), mRNA	1	uncharacterized protein LOC106773250	LOC106773250	NA	GO:0003676~nucleic acid binding;GO:0004190~aspartic-type endopeptidase activity;GO:0008270~zinc ion binding	NA	NA
vun-miR169a-5p	XM_028064586.1	2	-1	1	21	1215	1235	CAGCCAAGGAUGACUUGCCGG	UAGGCAACUCAUCCUUGGCUC	Cleavage	PREDICTED: Vigna unguiculata nuclear transcription factor Y subunit A-10-like (LOC114178583), mRNA	3	Nuclear transcription factor Y	DEO72_LG6g2844	Transcription factors [03000]	GO:0003700~sequence-specific DNA binding transcription factor activity	NA	NA
vun-miR169a-5p	XM_028064586.1	3.5	-1	1	21	1163	1183	CAGCCAAGGAUGACUUGCCGG	UAGGCAAUCCAUCCUUGGCUC	Cleavage	PREDICTED: Vigna unguiculata nuclear transcription factor Y subunit A-10-like (LOC114178583), mRNA	3	Nuclear transcription factor Y	DEO72_LG6g2844	Transcription factors [03000]	GO:0003700~sequence-specific DNA binding transcription factor activity	NA	NA
vun-miR169a-5p	XM_028064586.1	3.5	-1	1	21	1191	1211	CAGCCAAGGAUGACUUGCCGG	UUGGCAAUCCAUCCUUGGCUC	Cleavage	PREDICTED: Vigna unguiculata nuclear transcription factor Y subunit A-10-like (LOC114178583), mRNA	3	Nuclear transcription factor Y	DEO72_LG6g2844	Transcription factors [03000]	GO:0003700~sequence-specific DNA binding transcription factor activity	NA	NA
vun-miR169a-5p	XM_028064614.1	4.5	-1	1	21	547	567	CAGCCAAGGAUGACUUGCCGG	GCAAUGAGUCGUUUUUGGCUG	Cleavage	PREDICTED: Vigna unguiculata F-box protein SKIP8 (LOC114178607), mRNA	1	Translation initiation factor 2A	DEO72_LG2g5499	NA	GO:0003743~translation initiation factor activity	NA	GO:0016021~integral component of membrane
vun-miR169a-5p	XM_028065138.1	5	-1	1	21	1283	1302	CAGCCAAGGAUGACUUGCCGG	UCGGAAAG-CAUCCUUGGCUA	Cleavage	PREDICTED: Vigna unguiculata protein TIFY 6B-like (LOC114178971), transcript variant X1, mRNA	1	CO/COL/TOC1 protein	DEO72_LG2g5713	Plant hormone signal transduction [04075]	NA	NA	NA
vun-miR169a-5p	XM_028065139.1	5	-1	1	21	1275	1294	CAGCCAAGGAUGACUUGCCGG	UCGGAAAG-CAUCCUUGGCUA	Cleavage	PREDICTED: Vigna unguiculata protein TIFY 6B-like (LOC114178971), transcript variant X2, mRNA	1	CO/COL/TOC1 protein	DEO72_LG2g5713	Plant hormone signal transduction [04075]	NA	NA	NA
vun-miR169a-5p	XM_028065238.1	5	-1	1	21	1204	1224	CAGCCAAGGAUGACUUGCCGG	GCUCUAAGUCAUCCUUGGAUA	Cleavage	PREDICTED: Vigna unguiculata CDPK-related kinase 5-like (LOC114179042), mRNA	1	CDPK-related kinase 5-like isoform X1	LOC101492337	Enzymes with EC numbers[99980]	GO:0004672~protein kinase activity;GO:0005524~ATP binding	NA	NA
vun-miR169a-5p	XM_028066060.1	3.5	-1	1	21	770	790	CAGCCAAGGAUGACUUGCCGG	UAGAAGAGUCAUCCUUGGCUG	Cleavage	PREDICTED: Vigna unguiculata uncharacterized LOC114179647 (LOC114179647), transcript variant X1, mRNA	2	DNA topoisomerase III	DEO72_LG9g1829	Membrane trafficking [04131]; Mitochondrial biogenesis [03029]; Cytoskeleton proteins [04812]; Messenger RNA biogenesis [03019]	GO:0003774~motor activity;GO:0003779~actin binding;GO:0005524~ATP binding;GO:0016853~isomerase activity	GO:0007015~actin filament organization	GO:0016459~myosin complex
vun-miR169a-5p	XM_028066060.1	4	-1	1	21	472	492	CAGCCAAGGAUGACUUGCCGG	GAUGCAAGCCAUCUUUGGCUU	Cleavage	PREDICTED: Vigna unguiculata uncharacterized LOC114179647 (LOC114179647), transcript variant X1, mRNA	2	DNA topoisomerase III	DEO72_LG9g1829	Membrane trafficking [04131]; Mitochondrial biogenesis [03029]; Cytoskeleton proteins [04812]; Messenger RNA biogenesis [03019]	GO:0003774~motor activity;GO:0003779~actin binding;GO:0005524~ATP binding;GO:0016853~isomerase activity	GO:0007015~actin filament organization	GO:0016459~myosin complex
vun-miR169a-5p	XM_028066705.1	4.5	-1	1	21	768	788	CAGCCAAGGAUGACUUGCCGG	UUGUCAAGUCAUCAUUGGUCG	Cleavage	PREDICTED: Vigna unguiculata pentatricopeptide repeat-containing protein At4g14050, mitochondrial-like (LOC114180392), mRNA	1	Structure-specific endonuclease subunit SLX1	DEO72_LG11g48	NA	GO:0004519~endonuclease activity;GO:0008270~zinc ion binding	NA	NA
vun-miR169a-5p	XM_028066740.1	4.5	-1	1	21	1127	1147	CAGCCAAGGAUGACUUGCCGG	CUCGCAAAGCAUCCUUGGCUC	Cleavage	PREDICTED: Vigna unguiculata protein TIFY 6B-like (LOC114180419), transcript variant X1, mRNA	1	CO/COL/TOC1 protein	DEO72_LG5g381	Plant hormone signal transduction [04075]	NA	NA	NA
vun-miR169a-5p	XM_028066741.1	4.5	-1	1	21	1740	1760	CAGCCAAGGAUGACUUGCCGG	CUCGCAAAGCAUCCUUGGCUC	Cleavage	PREDICTED: Vigna unguiculata protein TIFY 6B-like (LOC114180419), transcript variant X3, mRNA	1	CO/COL/TOC1 protein	DEO72_LG5g381	Plant hormone signal transduction [04075]	NA	NA	NA
vun-miR169a-5p	XM_028066864.1	4.5	-1	1	21	924	944	CAGCCAAGGAUGACUUGCCGG	AGCCCGAGUCAUCUGUGGCUG	Cleavage	PREDICTED: Vigna unguiculata uncharacterized LOC114180552 (LOC114180552), transcript variant X1, mRNA	1	Plant G-box-binding factor	DEO72_LG6g2758	NA	GO:0003700~sequence-specific DNA binding transcription factor activity	NA	NA
vun-miR169a-5p	XM_028067135.1	4	-1	1	21	3947	3967	CAGCCAAGGAUGACUUGCCGG	ACGGUGAGUCAGUUUUGGUUG	Translation	PREDICTED: Vigna unguiculata uncharacterized LOC114180843 (LOC114180843), mRNA	1	Putative nucleotidyltransferase, Ribonuclease H (EC 2.7.7.-) (EC 3.1.26.4)	MtrunA17_Chr4g0053141	NA	GO:0003676~nucleic acid binding;GO:0004523~RNA-DNA hybrid ribonuclease activity;GO:0008270~zinc ion binding;GO:0016779~nucleotidyltransferase activity	GO:0015074~DNA integration	NA
vun-miR169a-5p	XM_028067922.1	5	-1	1	21	1389	1409	CAGCCAAGGAUGACUUGCCGG	AUGGCAAGUUAUGAUUGGUUA	Cleavage	PREDICTED: Vigna unguiculata protein DETOXIFICATION 34-like (LOC114181458), mRNA	1	Protein DETOXIFICATION (Multidrug and toxic compound extrusion protein)	Vigan.11G177400 VIGAN_11177400	Transporters [02000]	GO:0015297~antiporter activity;GO:0042910~xenobiotic transporter activity	NA	GO:0016021~integral component of membrane
vun-miR169a-5p	XM_028068750.1	4	-1	1	21	3653	3673	CAGCCAAGGAUGACUUGCCGG	AUGGUGAGUCAGUUUUGGUUG	Translation	PREDICTED: Vigna unguiculata uncharacterized LOC114182012 (LOC114182012), mRNA	1	Uncharacterized protein	TSUD_411620	NA	GO:0003676~nucleic acid binding;GO:0004190~aspartic-type endopeptidase activity;GO:0008270~zinc ion binding	GO:0015074~DNA integration	NA
vun-miR169a-5p	XM_028069806.1	5	-1	1	21	1221	1244	CAGCCAAG---GAUGACUUGCCGG	UGGGCAAGUCAUCAUCCUUGGUUG	Cleavage	PREDICTED: Vigna unguiculata uncharacterized LOC114182992 (LOC114182992), mRNA	1	Uncharacterized protein	DEO72_LG10g1159	NA	NA	NA	GO:0016021~integral component of membrane
vun-miR169a-5p	XM_028071092.1	2	-1	1	21	1214	1234	CAGCCAAGGAUGACUUGCCGG	UUGGGAAGUCAUCCUUGGCUC	Cleavage	PREDICTED: Vigna unguiculata nuclear transcription factor Y subunit A-8-like (LOC114183912), transcript variant X1, mRNA	1	Nuclear transcription factor Y	DEO72_LG10g311	Transcription factors [03000]	GO:0003677~DNA binding;GO:0003700~sequence-specific DNA binding transcription factor activity	NA	GO:0016602~CCAAT-binding factor complex
vun-miR169a-5p	XM_028071093.1	2	-1	1	21	985	1005	CAGCCAAGGAUGACUUGCCGG	UUGGGAAGUCAUCCUUGGCUC	Cleavage	PREDICTED: Vigna unguiculata nuclear transcription factor Y subunit A-8-like (LOC114183912), transcript variant X2, mRNA	1	Nuclear transcription factor Y	DEO72_LG10g311	Transcription factors [03000]	GO:0003677~DNA binding;GO:0003700~sequence-specific DNA binding transcription factor activity	NA	GO:0016602~CCAAT-binding factor complex
vun-miR169a-5p	XM_028071647.1	3.5	-1	1	21	281	302	CAGCCAAGGAUGACU-UGCCGG	GCGGCACAGUCAUUCUUGGCUU	Cleavage	PREDICTED: Vigna unguiculata UPF0481 protein At3g47200-like (LOC114184335), mRNA	1	Uncharacterized protein	DEO72_LG10g2912	NA	NA	NA	GO:0016021~integral component of membrane
vun-miR169a-5p	XM_028071981.1	4	-1	1	21	452	472	CAGCCAAGGAUGACUUGCCGG	AUGGAGAGUCGUAUUUGGCUG	Cleavage	PREDICTED: Vigna unguiculata sodium/calcium exchanger NCL-like (LOC114184666), mRNA	1	EF-Hand 1	DEO72_LG10g1242	NA	GO:0005509~calcium ion binding	GO:0055085~transmembrane transport	GO:0016021~integral component of membrane
vun-miR169a-5p	XM_028072229.1	4	-1	1	21	1033	1053	CAGCCAAGGAUGACUUGCCGG	UCGGUAAAUUAUCGUUGGUUG	Cleavage	PREDICTED: Vigna unguiculata probable ADP-ribosylation factor GTPase-activating protein AGD6 (LOC114184864), transcript variant X1, mRNA	1	ADP-ribosylation factor GTPase-activating protein 1	DEO72_LG6g2542	Endocytosis [04144]; Membrane trafficking [04131]	GO:0005096~GTPase activator activity;GO:0046872~metal ion binding	NA	NA
vun-miR169a-5p	XM_028072235.1	4	-1	1	21	1035	1055	CAGCCAAGGAUGACUUGCCGG	UCGGUAAAUUAUCGUUGGUUG	Cleavage	PREDICTED: Vigna unguiculata probable ADP-ribosylation factor GTPase-activating protein AGD6 (LOC114184864), transcript variant X2, mRNA	1	ADP-ribosylation factor GTPase-activating protein 1	DEO72_LG6g2542	Endocytosis [04144]; Membrane trafficking [04131]	GO:0005096~GTPase activator activity;GO:0046872~metal ion binding	NA	NA
vun-miR169a-5p	XM_028073384.1	5	-1	1	21	1481	1501	CAGCCAAGGAUGACUUGCCGG	CUGGCAGAUCAACUUUGACUG	Translation	PREDICTED: Vigna unguiculata putative metallophosphoesterase At3g03305 (LOC114185568), mRNA	1	Metallo-dependent phosphatase-like	DEO72_LG10g3699	NA	GO:0016787~hydrolase activity	NA	GO:0016021~integral component of membrane
vun-miR169a-5p	XM_028073750.1	3.5	-1	1	21	1024	1044	CAGCCAAGGAUGACUUGCCGG	CUGACAAUUCAUCCUUGGAUG	Cleavage	PREDICTED: Vigna unguiculata uncharacterized LOC114185821 (LOC114185821), transcript variant X1, mRNA	1	Bile acid:Na+ symporter	DEO72_LG10g172	Endocytosis [04144]	NA	GO:0015031~protein transport	NA
vun-miR169a-5p	XM_028073751.1	3.5	-1	1	21	992	1012	CAGCCAAGGAUGACUUGCCGG	CUGACAAUUCAUCCUUGGAUG	Cleavage	PREDICTED: Vigna unguiculata uncharacterized LOC114185821 (LOC114185821), transcript variant X2, mRNA	1	Bile acid:Na+ symporter	DEO72_LG10g172	Endocytosis [04144]	NA	GO:0015031~protein transport	NA
vun-miR169a-5p	XM_028073753.1	3.5	-1	1	21	908	928	CAGCCAAGGAUGACUUGCCGG	CUGACAAUUCAUCCUUGGAUG	Cleavage	PREDICTED: Vigna unguiculata uncharacterized LOC114185821 (LOC114185821), transcript variant X3, mRNA	1	Bile acid:Na+ symporter	DEO72_LG10g172	Endocytosis [04144]	NA	GO:0015031~protein transport	NA
vun-miR169a-5p	XM_028073820.1	4	-1	1	21	1148	1168	CAGCCAAGGAUGACUUGCCGG	UUGGCGAGGUAUCCUUGCCUG	Cleavage	PREDICTED: Vigna unguiculata uncharacterized LOC114185880 (LOC114185880), transcript variant X1, mRNA	1	Uncharacterized protein	DEO72_LG10g3102	NA	NA	NA	NA
vun-miR169a-5p	XM_028073821.1	4	-1	1	21	689	709	CAGCCAAGGAUGACUUGCCGG	UUGGCGAGGUAUCCUUGCCUG	Cleavage	PREDICTED: Vigna unguiculata uncharacterized LOC114185880 (LOC114185880), transcript variant X2, mRNA	1	Uncharacterized protein	DEO72_LG10g3102	NA	NA	NA	NA
vun-miR169a-5p	XM_028074083.1	4	-1	1	21	1156	1176	CAGCCAAGGAUGACUUGCCGG	UUGGCGAGGUAUCCUUGCCUG	Cleavage	PREDICTED: Vigna unguiculata uncharacterized LOC114186070 (LOC114186070), transcript variant X1, mRNA	1	Uncharacterized protein	DEO72_LG10g3101	NA	NA	NA	NA
vun-miR169a-5p	XM_028074084.1	4	-1	1	21	728	748	CAGCCAAGGAUGACUUGCCGG	UUGGCGAGGUAUCCUUGCCUG	Cleavage	PREDICTED: Vigna unguiculata uncharacterized LOC114186070 (LOC114186070), transcript variant X2, mRNA	1	Uncharacterized protein	DEO72_LG10g3101	NA	NA	NA	NA
vun-miR169a-5p	XM_028076029.1	2.5	-1	1	21	1358	1378	CAGCCAAGGAUGACUUGCCGG	GCGGCAAAUCAUUCUUGGCUU	Cleavage	PREDICTED: Vigna unguiculata nuclear transcription factor Y subunit A-1 (LOC114187709), transcript variant X1, mRNA	1	Nuclear transcription factor Y	DEO72_LG1g1713	Transcription factors [03000]	GO:0003677~DNA binding;GO:0003700~sequence-specific DNA binding transcription factor activity	NA	GO:0016602~CCAAT-binding factor complex
vun-miR169a-5p	XM_028076030.1	2.5	-1	1	21	1190	1210	CAGCCAAGGAUGACUUGCCGG	GCGGCAAAUCAUUCUUGGCUU	Cleavage	PREDICTED: Vigna unguiculata nuclear transcription factor Y subunit A-1 (LOC114187709), transcript variant X2, mRNA	1	Nuclear transcription factor Y	DEO72_LG1g1713	Transcription factors [03000]	GO:0003677~DNA binding;GO:0003700~sequence-specific DNA binding transcription factor activity	NA	GO:0016602~CCAAT-binding factor complex
vun-miR169a-5p	XM_028076031.1	2.5	-1	1	21	1341	1361	CAGCCAAGGAUGACUUGCCGG	GCGGCAAAUCAUUCUUGGCUU	Cleavage	PREDICTED: Vigna unguiculata nuclear transcription factor Y subunit A-1 (LOC114187709), transcript variant X3, mRNA	1	Nuclear transcription factor Y	DEO72_LG1g1713	Transcription factors [03000]	GO:0003677~DNA binding;GO:0003700~sequence-specific DNA binding transcription factor activity	NA	GO:0016602~CCAAT-binding factor complex
vun-miR169a-5p	XM_028076032.1	2.5	-1	1	21	1256	1276	CAGCCAAGGAUGACUUGCCGG	GCGGCAAAUCAUUCUUGGCUU	Cleavage	PREDICTED: Vigna unguiculata nuclear transcription factor Y subunit A-1 (LOC114187709), transcript variant X4, mRNA	1	Nuclear transcription factor Y	DEO72_LG1g1713	Transcription factors [03000]	GO:0003677~DNA binding;GO:0003700~sequence-specific DNA binding transcription factor activity	NA	GO:0016602~CCAAT-binding factor complex
vun-miR169a-5p	XM_028076284.1	5	-1	1	21	627	647	CAGCCAAGGAUGACUUGCCGG	GGGAGAAGUUAUUCUUGGCUA	Cleavage	PREDICTED: Vigna unguiculata clathrin light chain 1-like (LOC114187886), mRNA	1	Clathrin light chain	DEO72_LG1g356	NA	GO:0005198~structural molecule activity	GO:0006886~intracellular protein transport;GO:0016192~vesicle-mediated transport	GO:0030130~clathrin coat of trans-Golgi network vesicle;GO:0030132~clathrin coat of coated pit
vun-miR169a-5p	XM_028076981.1	5	-1	1	21	3337	3357	CAGCCAAGGAUGACUUGCCGG	UGGGCAAGUUAUUAUUGGCAU	Cleavage	PREDICTED: Vigna unguiculata probable receptor-like protein kinase At1g30570 (LOC114188395), mRNA	1	Protein kinase domain-containing protein	Vigan.05G107900 VIGAN_05107900	NA	GO:0004672~protein kinase activity;GO:0005524~ATP binding	NA	GO:0016021~integral component of membrane
vun-miR169a-5p	XM_028077454.1	4.5	-1	1	21	862	882	CAGCCAAGGAUGACUUGCCGG	GGGGCAGGUUAUCUUUUCCUG	Cleavage	PREDICTED: Vigna unguiculata aspartyl protease family protein 2 (LOC114188810), mRNA	1	Aspartyl protease family protein	DEO72_LG1g1149	Peptidases and inhibitors [01002]	GO:0004190~aspartic-type endopeptidase activity	NA	NA
vun-miR169a-5p	XM_028077926.1	4.5	-1	1	21	1983	2003	CAGCCAAGGAUGACUUGCCGG	AAGGUAAGUCACCUUUGGUGG	Translation	PREDICTED: Vigna unguiculata L-type lectin-domain containing receptor kinase VII.1-like (LOC114189214), mRNA	1	Brassinosteroid insensitive 1-associated receptor kinase 1	DEO72_LG1g384	NA	GO:0004672~protein kinase activity;GO:0005524~ATP binding;GO:0030246~carbohydrate binding	NA	GO:0016021~integral component of membrane
vun-miR169a-5p	XM_028078414.1	4.5	-1	1	21	929	949	CAGCCAAGGAUGACUUGCCGG	CCGGGCAGUUGGCCUUGGCUG	Translation	PREDICTED: Vigna unguiculata cyclin-H1-1 (LOC114189744), mRNA	1	Cyclin H	DEO72_LG9g2359	Transcription machinery [03021]; Basal transcription factors [03022]; DNA repair and recombination proteins [03400]; Nucleotide excision repair [03420]	NA	NA	NA
vun-miR169a-5p	XM_028079398.1	4	-1	1	21	3241	3261	CAGCCAAGGAUGACUUGCCGG	AUGGUGAAUCAUCUUGGGCUG	Cleavage	PREDICTED: Vigna unguiculata probable inactive ATP-dependent zinc metalloprotease FTSHI 5, chloroplastic (LOC114190492), transcript variant X1, mRNA	1	Cell division protease FtsH	DEO72_LG9g2469	NA	GO:0004222~metalloendopeptidase activity;GO:0005524~ATP binding	GO:0051301~cell division	NA
vun-miR169a-5p	XM_028079399.1	4	-1	1	21	3071	3091	CAGCCAAGGAUGACUUGCCGG	AUGGUGAAUCAUCUUGGGCUG	Cleavage	PREDICTED: Vigna unguiculata probable inactive ATP-dependent zinc metalloprotease FTSHI 5, chloroplastic (LOC114190492), transcript variant X2, mRNA	1	Cell division protease FtsH	DEO72_LG9g2469	NA	GO:0004222~metalloendopeptidase activity;GO:0005524~ATP binding	GO:0051301~cell division	NA
vun-miR169a-5p	XM_028079400.1	4	-1	1	21	2260	2280	CAGCCAAGGAUGACUUGCCGG	AUGGUGAAUCAUCUUGGGCUG	Cleavage	PREDICTED: Vigna unguiculata probable inactive ATP-dependent zinc metalloprotease FTSHI 5, chloroplastic (LOC114190492), transcript variant X3, mRNA	1	Retrovirus-related Pol polyprotein from transposon TNT 1-94	KK1_010223	Spliceosome [03041]	NA	NA	NA
vun-miR169a-5p	XM_028079483.1	4.5	-1	1	21	2544	2564	CAGCCAAGGAUGACUUGCCGG	GGGGUAAGCCAUCCUUUGCUA	Cleavage	PREDICTED: Vigna unguiculata receptor-like serine/threonine-protein kinase ALE2 (LOC114190550), transcript variant X1, mRNA	1	Serine/threonine-protein kinase PBS1	DEO72_LG9g1825	NA	GO:0004674~protein serine/threonine kinase activity;GO:0005524~ATP binding	NA	GO:0016021~integral component of membrane
vun-miR169a-5p	XM_028079531.1	4.5	-1	1	21	1057	1077	CAGCCAAGGAUGACUUGCCGG	CUUGUUGGUUGUCUUUGGCUG	Cleavage	PREDICTED: Vigna unguiculata actin-interacting protein 1-2-like (LOC114190584), transcript variant X1, mRNA	1	Transcriptional coactivator HFI1/ADA1	DEO72_LG9g3548	NA	NA	NA	NA
vun-miR169a-5p	XM_028079532.1	4.5	-1	1	21	1057	1077	CAGCCAAGGAUGACUUGCCGG	CUUGUUGGUUGUCUUUGGCUG	Cleavage	PREDICTED: Vigna unguiculata actin-interacting protein 1-2-like (LOC114190584), transcript variant X3, mRNA	1	Transcriptional coactivator HFI1/ADA1	DEO72_LG9g3548	NA	NA	NA	NA
vun-miR169a-5p	XM_028079870.1	4.5	-1	1	21	833	853	CAGCCAAGGAUGACUUGCCGG	UCGGGGAGUCAUCCGUGGAUG	Cleavage	PREDICTED: Vigna unguiculata putative lysine-specific demethylase JMJ16 (LOC114190821), transcript variant X1, mRNA	1	Histone demethylase JARID1	DEO72_LG9g2539	Protein phosphatases and associated proteins [01009]; Chromosome and associated proteins [03036]	GO:0008168~methyltransferase activity	GO:0032259~methylation	GO:0005634~nucleus
vun-miR169a-5p	XM_028079871.1	4.5	-1	1	21	842	862	CAGCCAAGGAUGACUUGCCGG	UCGGGGAGUCAUCCGUGGAUG	Cleavage	PREDICTED: Vigna unguiculata putative lysine-specific demethylase JMJ16 (LOC114190821), transcript variant X2, mRNA	1	Histone demethylase JARID1	DEO72_LG9g2539	Protein phosphatases and associated proteins [01009]; Chromosome and associated proteins [03036]	GO:0008168~methyltransferase activity	GO:0032259~methylation	GO:0005634~nucleus
vun-miR169a-5p	XM_028079872.1	4.5	-1	1	21	744	764	CAGCCAAGGAUGACUUGCCGG	UCGGGGAGUCAUCCGUGGAUG	Cleavage	PREDICTED: Vigna unguiculata putative lysine-specific demethylase JMJ16 (LOC114190821), transcript variant X3, mRNA	1	Histone demethylase JARID1	DEO72_LG9g2539	Protein phosphatases and associated proteins [01009]; Chromosome and associated proteins [03036]	GO:0008168~methyltransferase activity	GO:0032259~methylation	GO:0005634~nucleus
vun-miR169a-5p	XM_028079873.1	4.5	-1	1	21	754	774	CAGCCAAGGAUGACUUGCCGG	UCGGGGAGUCAUCCGUGGAUG	Cleavage	PREDICTED: Vigna unguiculata putative lysine-specific demethylase JMJ16 (LOC114190821), transcript variant X4, mRNA	1	Histone demethylase JARID1	DEO72_LG9g2539	Protein phosphatases and associated proteins [01009]; Chromosome and associated proteins [03036]	GO:0008168~methyltransferase activity	GO:0032259~methylation	GO:0005634~nucleus
vun-miR169a-5p	XM_028080181.1	3.5	-1	1	21	1886	1906	CAGCCAAGGAUGACUUGCCGG	UUGAGAAGUCAUCCUUGGCGG	Cleavage	PREDICTED: Vigna unguiculata uncharacterized LOC114191035 (LOC114191035), transcript variant X1, mRNA	1	Uncharacterized protein	D0Y65_028220	NA	NA	NA	GO:0016021~integral component of membrane
vun-miR169a-5p	XM_028080682.1	4	-1	1	21	928	948	CAGCCAAGGAUGACUUGCCGG	UUGGGAAAUUGUCUUUGGUUG	Cleavage	PREDICTED: Vigna unguiculata ADP-ribosylation factor GTPase-activating protein AGD7 (LOC114191496), transcript variant X1, mRNA	1	ADP-ribosylation factor GTPase-activating protein 1	DEO72_LG9g2089	Endocytosis [04144]; Membrane trafficking [04131]	GO:0005096~GTPase activator activity;GO:0046872~metal ion binding	NA	NA
vun-miR169a-5p	XM_028080683.1	4	-1	1	21	929	949	CAGCCAAGGAUGACUUGCCGG	UUGGGAAAUUGUCUUUGGUUG	Cleavage	PREDICTED: Vigna unguiculata ADP-ribosylation factor GTPase-activating protein AGD7 (LOC114191496), transcript variant X2, mRNA	1	ADP-ribosylation factor GTPase-activating protein 1	DEO72_LG9g2089	Endocytosis [04144]; Membrane trafficking [04131]	GO:0005096~GTPase activator activity;GO:0046872~metal ion binding	NA	NA
vun-miR169a-5p	XM_028080777.1	4	-1	1	21	1858	1878	CAGCCAAGGAUGACUUGCCGG	GCACUAAGUCAUCCAUGGCUG	Cleavage	PREDICTED: Vigna unguiculata CDPK-related kinase 7-like (LOC114191548), transcript variant X1, mRNA	1	Protein kinase	DEO72_LG9g489	NA	GO:0004672~protein kinase activity;GO:0005524~ATP binding	NA	NA
vun-miR169a-5p	XM_028080778.1	4	-1	1	21	1765	1785	CAGCCAAGGAUGACUUGCCGG	GCACUAAGUCAUCCAUGGCUG	Cleavage	PREDICTED: Vigna unguiculata CDPK-related kinase 7-like (LOC114191548), transcript variant X2, mRNA	1	Protein kinase	DEO72_LG9g489	NA	GO:0004672~protein kinase activity;GO:0005524~ATP binding	NA	NA
vun-miR169a-5p	XM_028080987.1	3.5	-1	1	21	607	627	CAGCCAAGGAUGACUUGCCGG	UAGAAGAGUCAUCCUUGGCUG	Cleavage	PREDICTED: Vigna unguiculata methylmalonate-semialdehyde dehydrogenase [acylating], mitochondrial-like (LOC114191663), transcript variant X1, mRNA	1	Uncharacterized protein	L195_g013804	NA	GO:0003676~nucleic acid binding	GO:0015074~DNA integration	NA
vun-miR169a-5p	XM_028080988.1	3.5	-1	1	21	608	628	CAGCCAAGGAUGACUUGCCGG	UAGAAGAGUCAUCCUUGGCUG	Cleavage	PREDICTED: Vigna unguiculata methylmalonate-semialdehyde dehydrogenase [acylating], mitochondrial-like (LOC114191663), transcript variant X2, mRNA	1	Uncharacterized protein	L195_g013804	NA	GO:0003676~nucleic acid binding	GO:0015074~DNA integration	NA
vun-miR169a-5p	XM_028080989.1	3.5	-1	1	21	608	628	CAGCCAAGGAUGACUUGCCGG	UAGAAGAGUCAUCCUUGGCUG	Cleavage	PREDICTED: Vigna unguiculata methylmalonate-semialdehyde dehydrogenase [acylating], mitochondrial-like (LOC114191663), transcript variant X3, mRNA	1	Uncharacterized protein	L195_g013804	NA	GO:0003676~nucleic acid binding	GO:0015074~DNA integration	NA
vun-miR169a-5p	XM_028080990.1	3.5	-1	1	21	609	629	CAGCCAAGGAUGACUUGCCGG	UAGAAGAGUCAUCCUUGGCUG	Cleavage	PREDICTED: Vigna unguiculata methylmalonate-semialdehyde dehydrogenase [acylating], mitochondrial-like (LOC114191663), transcript variant X4, mRNA	1	Uncharacterized protein	L195_g013804	NA	GO:0003676~nucleic acid binding	GO:0015074~DNA integration	NA
vun-miR169a-5p	XM_028080991.1	3.5	-1	1	21	564	584	CAGCCAAGGAUGACUUGCCGG	UAGAAGAGUCAUCCUUGGCUG	Cleavage	PREDICTED: Vigna unguiculata methylmalonate-semialdehyde dehydrogenase [acylating], mitochondrial-like (LOC114191663), transcript variant X5, mRNA	1	Uncharacterized protein	L195_g013804	NA	GO:0003676~nucleic acid binding	GO:0015074~DNA integration	NA
vun-miR169a-5p	XM_028080992.1	3.5	-1	1	21	580	600	CAGCCAAGGAUGACUUGCCGG	UAGAAGAGUCAUCCUUGGCUG	Cleavage	PREDICTED: Vigna unguiculata methylmalonate-semialdehyde dehydrogenase [acylating], mitochondrial-like (LOC114191663), transcript variant X6, mRNA	1	Uncharacterized protein	L195_g013804	NA	GO:0003676~nucleic acid binding	GO:0015074~DNA integration	NA
vun-miR169a-5p	XM_028080993.1	3.5	-1	1	21	607	627	CAGCCAAGGAUGACUUGCCGG	UAGAAGAGUCAUCCUUGGCUG	Cleavage	PREDICTED: Vigna unguiculata methylmalonate-semialdehyde dehydrogenase [acylating], mitochondrial-like (LOC114191663), transcript variant X7, mRNA	1	Uncharacterized protein	L195_g013804	NA	GO:0003676~nucleic acid binding	GO:0015074~DNA integration	NA
vun-miR169a-5p	XM_028081033.1	4.5	-1	1	21	250	270	CAGCCAAGGAUGACUUGCCGG	UAGGCGAGUCAUGCUUGCCUU	Cleavage	PREDICTED: Vigna unguiculata calcium-transporting ATPase 12, plasma membrane-type-like (LOC114191685), mRNA	1	Calcium-transporting ATPase (EC 7.2.2.10)	DEO72_LG6g2393	Enzymes with EC numbers[99980]	GO:0005388~calcium-transporting ATPase activity;GO:0005524~ATP binding	NA	GO:0016021~integral component of membrane
vun-miR169a-5p	XM_028081314.1	4.5	-1	1	21	3266	3286	CAGCCAAGGAUGACUUGCCGG	AUGGCGAGUGAUUAUUGGUUG	Cleavage	PREDICTED: Vigna unguiculata ABC transporter C family member 14-like (LOC114191871), mRNA	1	ATP-binding cassette	DEO72_LG9g1590	NA	GO:0005524~ATP binding;GO:0016887~ATPase activity;GO:0042626~ATPase activity, coupled to transmembrane movement of substances	NA	GO:0016021~integral component of membrane
vun-miR169a-5p	XM_028082329.1	3.5	-1	1	21	1360	1380	CAGCCAAGGAUGACUUGCCGG	UUGGUAACUCUUUCUUGGCUG	Translation	PREDICTED: Vigna unguiculata ABC transporter C family member 5-like (LOC114192569), mRNA	1	ATP-binding cassette	DEO72_LG9g1812	ABC transporters [02010]; Transporters [02000]	GO:0005524~ATP binding;GO:0016887~ATPase activity;GO:0042626~ATPase activity, coupled to transmembrane movement of substances	NA	GO:0016021~integral component of membrane
vun-miR169a-5p	XM_028082943.1	5	-1	1	21	467	487	CAGCCAAGGAUGACUUGCCGG	CCGGAAGCUCAUCCUUGGCAU	Cleavage	PREDICTED: Vigna unguiculata sulfate transporter 1.3 (LOC114193223), transcript variant X1, mRNA	1	Solute carrier family 26	DEO72_LG7g1796	Transporters [02000]	GO:0008271~secondary active sulfate transmembrane transporter activity	NA	GO:0016021~integral component of membrane
vun-miR169a-5p	XM_028082944.1	5	-1	1	21	715	735	CAGCCAAGGAUGACUUGCCGG	CCGGAAGCUCAUCCUUGGCAU	Cleavage	PREDICTED: Vigna unguiculata sulfate transporter 1.3 (LOC114193223), transcript variant X2, mRNA	1	Solute carrier family 26	DEO72_LG7g1796	Transporters [02000]	GO:0008271~secondary active sulfate transmembrane transporter activity	NA	GO:0016021~integral component of membrane
vun-miR169a-5p	XM_028082945.1	5	-1	1	21	468	488	CAGCCAAGGAUGACUUGCCGG	CCGGAAGCUCAUCCUUGGCAU	Cleavage	PREDICTED: Vigna unguiculata sulfate transporter 1.3 (LOC114193223), transcript variant X3, mRNA	1	Solute carrier family 26	DEO72_LG7g1796	Transporters [02000]	GO:0008271~secondary active sulfate transmembrane transporter activity	NA	GO:0016021~integral component of membrane
vun-miR169a-5p	XM_028082946.1	5	-1	1	21	336	356	CAGCCAAGGAUGACUUGCCGG	CCGGAAGCUCAUCCUUGGCAU	Cleavage	PREDICTED: Vigna unguiculata sulfate transporter 1.3 (LOC114193223), transcript variant X4, mRNA	1	Solute carrier family 26	DEO72_LG7g1796	Transporters [02000]	GO:0008271~secondary active sulfate transmembrane transporter activity	NA	GO:0016021~integral component of membrane
vun-miR169a-5p	XM_028083954.1	1.5	-1	1	21	1430	1450	CAGCCAAGGAUGACUUGCCGG	GCGGCAAAUCAUUCUUGGCUG	Cleavage	PREDICTED: Vigna unguiculata nuclear transcription factor Y subunit A-9-like (LOC114193948), mRNA	1	Nuclear transcription factor Y	DEO72_LG7g3182	Transcription factors [03000]	GO:0003677~DNA binding;GO:0003700~sequence-specific DNA binding transcription factor activity	NA	GO:0016602~CCAAT-binding factor complex
vun-miR169a-5p	XM_028084093.1	3.5	-1	1	21	1163	1183	CAGCCAAGGAUGACUUGCCGG	AAGGUCAGUCUUCCUUGGUUG	Translation	PREDICTED: Vigna unguiculata peptidyl-prolyl cis-trans isomerase CYP95-like (LOC114194055), transcript variant X1, mRNA	1	peptidyl-prolyl cis-trans isomerase CYP95-like	LOC106764819	Chaperones and folding catalysts [03110]; Spliceosome [03041]	GO:0003755~peptidyl-prolyl cis-trans isomerase activity	NA	NA
vun-miR169a-5p	XM_028084094.1	3.5	-1	1	21	1232	1252	CAGCCAAGGAUGACUUGCCGG	AAGGUCAGUCUUCCUUGGUUG	Translation	PREDICTED: Vigna unguiculata peptidyl-prolyl cis-trans isomerase CYP95-like (LOC114194055), transcript variant X2, mRNA	1	peptidyl-prolyl cis-trans isomerase CYP95-like	LOC106764819	Chaperones and folding catalysts [03110]; Spliceosome [03041]	GO:0003755~peptidyl-prolyl cis-trans isomerase activity	NA	NA
vun-miR169a-5p	XM_028084095.1	3.5	-1	1	21	1138	1158	CAGCCAAGGAUGACUUGCCGG	AAGGUCAGUCUUCCUUGGUUG	Translation	PREDICTED: Vigna unguiculata peptidyl-prolyl cis-trans isomerase CYP95-like (LOC114194055), transcript variant X3, mRNA	1	peptidyl-prolyl cis-trans isomerase CYP95-like	LOC106764819	Chaperones and folding catalysts [03110]; Spliceosome [03041]	GO:0003755~peptidyl-prolyl cis-trans isomerase activity	NA	NA
vun-miR169a-5p	XM_028084096.1	3.5	-1	1	21	1213	1233	CAGCCAAGGAUGACUUGCCGG	AAGGUCAGUCUUCCUUGGUUG	Translation	PREDICTED: Vigna unguiculata peptidyl-prolyl cis-trans isomerase CYP95-like (LOC114194055), transcript variant X4, mRNA	1	peptidyl-prolyl cis-trans isomerase CYP95-like	LOC106764819	Chaperones and folding catalysts [03110]; Spliceosome [03041]	GO:0003755~peptidyl-prolyl cis-trans isomerase activity	NA	NA
vun-miR169a-5p	XM_028084097.1	3.5	-1	1	21	1227	1247	CAGCCAAGGAUGACUUGCCGG	AAGGUCAGUCUUCCUUGGUUG	Translation	PREDICTED: Vigna unguiculata peptidyl-prolyl cis-trans isomerase CYP95-like (LOC114194055), transcript variant X5, mRNA	1	peptidyl-prolyl cis-trans isomerase CYP95-like	LOC106764819	Chaperones and folding catalysts [03110]; Spliceosome [03041]	GO:0003755~peptidyl-prolyl cis-trans isomerase activity	NA	NA
vun-miR169a-5p	XM_028084098.1	3.5	-1	1	21	1069	1089	CAGCCAAGGAUGACUUGCCGG	AAGGUCAGUCUUCCUUGGUUG	Translation	PREDICTED: Vigna unguiculata peptidyl-prolyl cis-trans isomerase CYP95-like (LOC114194055), transcript variant X6, mRNA	1	peptidyl-prolyl cis-trans isomerase CYP95-like	LOC106764819	Chaperones and folding catalysts [03110]; Spliceosome [03041]	GO:0003755~peptidyl-prolyl cis-trans isomerase activity	NA	NA
vun-miR169a-5p	XM_028084099.1	3.5	-1	1	21	834	854	CAGCCAAGGAUGACUUGCCGG	AAGGUCAGUCUUCCUUGGUUG	Translation	PREDICTED: Vigna unguiculata peptidyl-prolyl cis-trans isomerase CYP95-like (LOC114194055), transcript variant X7, mRNA	1	peptidyl-prolyl cis-trans isomerase CYP95-like	LOC106764819	Chaperones and folding catalysts [03110]; Spliceosome [03041]	GO:0003755~peptidyl-prolyl cis-trans isomerase activity	NA	NA
vun-miR169a-5p	XM_028084116.1	4.5	-1	1	21	3222	3242	CAGCCAAGGAUGACUUGCCGG	AUGGCAAGUUUUCCUUGUCUU	Translation	PREDICTED: Vigna unguiculata ABC transporter C family member 3-like (LOC114194073), mRNA	1	ATP-binding cassette	DEO72_LG7g3111	NA	GO:0005524~ATP binding;GO:0016887~ATPase activity;GO:0042626~ATPase activity, coupled to transmembrane movement of substances	NA	GO:0016021~integral component of membrane
vun-miR169a-5p	XM_028084722.1	3.5	-1	1	21	1009	1029	CAGCCAAGGAUGACUUGCCGG	GGGGCAGCUCUUCUUUGGCUG	Translation	PREDICTED: Vigna unguiculata probable inorganic phosphate transporter 1-2 (LOC114194472), mRNA	1	MFS transporter	DEO72_LG7g2105	Transporters [02000]	GO:0022857~transmembrane transporter activity	NA	GO:0016021~integral component of membrane
vun-miR169a-5p	XM_028085161.1	5	-1	1	21	1541	1561	CAGCCAAGGAUGACUUGCCGG	CCAAAGGGUUAUCUUUGGCUG	Cleavage	PREDICTED: Vigna unguiculata internal alternative NAD(P)H-ubiquinone oxidoreductase A2, mitochondrial-like (LOC114194763), mRNA	1	NADH dehydrogenase	DEO72_LG7g2196	Enzymes with EC numbers[99980]	GO:0016491~oxidoreductase activity	NA	NA
vun-miR169a-5p	XM_028085573.1	4.5	-1	1	21	848	868	CAGCCAAGGAUGACUUGCCGG	AUGGCAAGUUUUCCUUGUCUU	Translation	PREDICTED: Vigna unguiculata ABC transporter C family member 3-like (LOC114195183), mRNA	1	receptor-like protein 12 isoform X2	LOC106764814	NA	NA	NA	GO:0016021~integral component of membrane
vun-miR169a-5p	XM_028085622.1	5	-1	1	21	431	451	CAGCCAAGGAUGACUUGCCGG	CUGCCGAGUCUUCUUUGGGUG	Translation	PREDICTED: Vigna unguiculata uncharacterized LOC114195226 (LOC114195226), mRNA	1	Uncharacterized protein (Fragment)	LR48_Vigan07g217900	NA	NA	NA	GO:0016021~integral component of membrane
vun-miR169a-5p	XM_028085845.1	5	-1	1	21	1506	1526	CAGCCAAGGAUGACUUGCCGG	ACAGUAAGACAUCUUUGGUUA	Cleavage	PREDICTED: Vigna unguiculata cytokinin dehydrogenase 9-like (LOC114195390), mRNA	1	FAD-binding PCMH-type domain-containing protein	Vigan.04G273200 VIGAN_04273200	Zeatin biosynthesis [00908]	GO:0019139~cytokinin dehydrogenase activity;GO:0071949~FAD binding	GO:0009690~cytokinin metabolic process	NA
vun-miR169a-5p	XM_028086180.1	4	-1	1	21	1312	1332	CAGCCAAGGAUGACUUGCCGG	GUGGCCAGUUAUCUUUAGUUG	Cleavage	PREDICTED: Vigna unguiculata J protein JJJ2 (LOC114195643), mRNA	1	DnaJ-like protein subfamily B member 12	DEO72_LG7g2014	NA	NA	NA	NA
vun-miR169a-5p	XR_003603494.1	3.5	-1	1	21	484	504	CAGCCAAGGAUGACUUGCCGG	UAGAAGAGUCAUCCUUGGCUG	Cleavage	PREDICTED: Vigna unguiculata uncharacterized LOC114179647 (LOC114179647), transcript variant X2, misc_RNA	2	NA	NA	NA	NA	NA	NA
vun-miR169a-5p	XR_003603494.1	4	-1	1	21	229	249	CAGCCAAGGAUGACUUGCCGG	GAUGCAAGCCAUCUUUGGCUU	Cleavage	PREDICTED: Vigna unguiculata uncharacterized LOC114179647 (LOC114179647), transcript variant X2, misc_RNA	2	NA	NA	NA	NA	NA	NA
vun-miR169a-5p	XR_003603495.1	3.5	-1	1	21	486	506	CAGCCAAGGAUGACUUGCCGG	UAGAAGAGUCAUCCUUGGCUG	Cleavage	PREDICTED: Vigna unguiculata uncharacterized LOC114179647 (LOC114179647), transcript variant X3, misc_RNA	2	NA	NA	NA	NA	NA	NA
vun-miR169a-5p	XR_003603495.1	4	-1	1	21	231	251	CAGCCAAGGAUGACUUGCCGG	GAUGCAAGCCAUCUUUGGCUU	Cleavage	PREDICTED: Vigna unguiculata uncharacterized LOC114179647 (LOC114179647), transcript variant X3, misc_RNA	2	NA	NA	NA	NA	NA	NA
vun-miR169a-5p	XR_003603496.1	3.5	-1	1	21	502	522	CAGCCAAGGAUGACUUGCCGG	UAGAAGAGUCAUCCUUGGCUG	Cleavage	PREDICTED: Vigna unguiculata uncharacterized LOC114179647 (LOC114179647), transcript variant X4, misc_RNA	2	NA	NA	NA	NA	NA	NA
vun-miR169a-5p	XR_003603496.1	4	-1	1	21	231	251	CAGCCAAGGAUGACUUGCCGG	GAUGCAAGCCAUCUUUGGCUU	Cleavage	PREDICTED: Vigna unguiculata uncharacterized LOC114179647 (LOC114179647), transcript variant X4, misc_RNA	2	NA	NA	NA	NA	NA	NA
vun-miR169a-5p	XR_003603497.1	3.5	-1	1	21	599	619	CAGCCAAGGAUGACUUGCCGG	UAGAAGAGUCAUCCUUGGCUG	Cleavage	PREDICTED: Vigna unguiculata uncharacterized LOC114179647 (LOC114179647), transcript variant X5, misc_RNA	2	NA	NA	NA	NA	NA	NA
vun-miR169a-5p	XR_003603497.1	4	-1	1	21	234	254	CAGCCAAGGAUGACUUGCCGG	GAUGCAAGCCAUCUUUGGCUU	Cleavage	PREDICTED: Vigna unguiculata uncharacterized LOC114179647 (LOC114179647), transcript variant X5, misc_RNA	2	NA	NA	NA	NA	NA	NA
vun-miR169a-5p	XR_003603498.1	3.5	-1	1	21	555	575	CAGCCAAGGAUGACUUGCCGG	UAGAAGAGUCAUCCUUGGCUG	Cleavage	PREDICTED: Vigna unguiculata uncharacterized LOC114179647 (LOC114179647), transcript variant X6, misc_RNA	2	NA	NA	NA	NA	NA	NA
vun-miR169a-5p	XR_003603498.1	4	-1	1	21	233	253	CAGCCAAGGAUGACUUGCCGG	GAUGCAAGCCAUCUUUGGCUU	Cleavage	PREDICTED: Vigna unguiculata uncharacterized LOC114179647 (LOC114179647), transcript variant X6, misc_RNA	2	NA	NA	NA	NA	NA	NA
vun-miR169a-5p	XR_003603499.1	3.5	-1	1	21	476	496	CAGCCAAGGAUGACUUGCCGG	UAGAAGAGUCAUCCUUGGCUG	Cleavage	PREDICTED: Vigna unguiculata uncharacterized LOC114179647 (LOC114179647), transcript variant X7, misc_RNA	2	NA	NA	NA	NA	NA	NA
vun-miR169a-5p	XR_003603499.1	4	-1	1	21	230	250	CAGCCAAGGAUGACUUGCCGG	GAUGCAAGCCAUCUUUGGCUU	Cleavage	PREDICTED: Vigna unguiculata uncharacterized LOC114179647 (LOC114179647), transcript variant X7, misc_RNA	2	NA	NA	NA	NA	NA	NA
vun-miR169a-5p	XR_003603500.1	3.5	-1	1	21	546	566	CAGCCAAGGAUGACUUGCCGG	UAGAAGAGUCAUCCUUGGCUG	Cleavage	PREDICTED: Vigna unguiculata uncharacterized LOC114179647 (LOC114179647), transcript variant X8, misc_RNA	2	NA	NA	NA	NA	NA	NA
vun-miR169a-5p	XR_003603500.1	4	-1	1	21	233	253	CAGCCAAGGAUGACUUGCCGG	GAUGCAAGCCAUCUUUGGCUU	Cleavage	PREDICTED: Vigna unguiculata uncharacterized LOC114179647 (LOC114179647), transcript variant X8, misc_RNA	2	NA	NA	NA	NA	NA	NA
vun-miR169a-5p	XR_003603501.1	3.5	-1	1	21	486	506	CAGCCAAGGAUGACUUGCCGG	UAGAAGAGUCAUCCUUGGCUG	Cleavage	PREDICTED: Vigna unguiculata uncharacterized LOC114179647 (LOC114179647), transcript variant X9, misc_RNA	2	NA	NA	NA	NA	NA	NA
vun-miR169a-5p	XR_003603501.1	4	-1	1	21	231	251	CAGCCAAGGAUGACUUGCCGG	GAUGCAAGCCAUCUUUGGCUU	Cleavage	PREDICTED: Vigna unguiculata uncharacterized LOC114179647 (LOC114179647), transcript variant X9, misc_RNA	2	NA	NA	NA	NA	NA	NA
vun-miR169a-5p	XR_003603502.1	3.5	-1	1	21	485	505	CAGCCAAGGAUGACUUGCCGG	UAGAAGAGUCAUCCUUGGCUG	Cleavage	PREDICTED: Vigna unguiculata uncharacterized LOC114179647 (LOC114179647), transcript variant X10, misc_RNA	2	NA	NA	NA	NA	NA	NA
vun-miR169a-5p	XR_003603502.1	4	-1	1	21	230	250	CAGCCAAGGAUGACUUGCCGG	GAUGCAAGCCAUCUUUGGCUU	Cleavage	PREDICTED: Vigna unguiculata uncharacterized LOC114179647 (LOC114179647), transcript variant X10, misc_RNA	2	NA	NA	NA	NA	NA	NA
vun-miR169a-5p	XR_003603503.1	3.5	-1	1	21	486	506	CAGCCAAGGAUGACUUGCCGG	UAGAAGAGUCAUCCUUGGCUG	Cleavage	PREDICTED: Vigna unguiculata uncharacterized LOC114179647 (LOC114179647), transcript variant X11, misc_RNA	2	NA	NA	NA	NA	NA	NA
vun-miR169a-5p	XR_003603503.1	4	-1	1	21	231	251	CAGCCAAGGAUGACUUGCCGG	GAUGCAAGCCAUCUUUGGCUU	Cleavage	PREDICTED: Vigna unguiculata uncharacterized LOC114179647 (LOC114179647), transcript variant X11, misc_RNA	2	NA	NA	NA	NA	NA	NA
vun-miR169a-5p	XR_003603504.1	3.5	-1	1	21	490	510	CAGCCAAGGAUGACUUGCCGG	UAGAAGAGUCAUCCUUGGCUG	Cleavage	PREDICTED: Vigna unguiculata uncharacterized LOC114179647 (LOC114179647), transcript variant X12, misc_RNA	2	NA	NA	NA	NA	NA	NA
vun-miR169a-5p	XR_003603504.1	4	-1	1	21	235	255	CAGCCAAGGAUGACUUGCCGG	GAUGCAAGCCAUCUUUGGCUU	Cleavage	PREDICTED: Vigna unguiculata uncharacterized LOC114179647 (LOC114179647), transcript variant X12, misc_RNA	2	NA	NA	NA	NA	NA	NA
vun-miR169a-5p	XR_003603505.1	3.5	-1	1	21	488	508	CAGCCAAGGAUGACUUGCCGG	UAGAAGAGUCAUCCUUGGCUG	Cleavage	PREDICTED: Vigna unguiculata uncharacterized LOC114179647 (LOC114179647), transcript variant X13, misc_RNA	2	NA	NA	NA	NA	NA	NA
vun-miR169a-5p	XR_003603505.1	4	-1	1	21	233	253	CAGCCAAGGAUGACUUGCCGG	GAUGCAAGCCAUCUUUGGCUU	Cleavage	PREDICTED: Vigna unguiculata uncharacterized LOC114179647 (LOC114179647), transcript variant X13, misc_RNA	2	NA	NA	NA	NA	NA	NA
vun-miR169a-5p	XR_003603690.1	4.5	-1	1	21	1127	1147	CAGCCAAGGAUGACUUGCCGG	CUCGCAAAGCAUCCUUGGCUC	Cleavage	PREDICTED: Vigna unguiculata protein TIFY 6B-like (LOC114180419), transcript variant X2, misc_RNA	1	NA	NA	NA	NA	NA	NA
vun-miR169a-5p	XR_003603696.1	4.5	-1	1	21	924	944	CAGCCAAGGAUGACUUGCCGG	AGCCCGAGUCAUCUGUGGCUG	Cleavage	PREDICTED: Vigna unguiculata uncharacterized LOC114180552 (LOC114180552), transcript variant X2, misc_RNA	1	NA	NA	NA	NA	NA	NA
vun-miR169a-5p	XR_003604544.1	4	-1	1	21	1676	1696	CAGCCAAGGAUGACUUGCCGG	CUAGAGAAUCAUCCUUGGUUG	Cleavage	PREDICTED: Vigna unguiculata uncharacterized LOC114184077 (LOC114184077), transcript variant X2, misc_RNA	1	NA	NA	NA	NA	NA	NA
vun-miR169a-5p	XR_003605829.1	4.5	-1	1	21	1057	1077	CAGCCAAGGAUGACUUGCCGG	CUUGUUGGUUGUCUUUGGCUG	Cleavage	PREDICTED: Vigna unguiculata actin-interacting protein 1-2-like (LOC114190584), transcript variant X2, misc_RNA	1	NA	NA	NA	NA	NA	NA
vun-miR171m-3p	XM_028046241.1	3.5	-1	1	21	71	91	UUGAGCCGCGUCAAUAUCUCA	GAAGAUGACGACGCGGUUCAA	Cleavage	PREDICTED: Vigna unguiculata 60S ribosomal protein L27a-3-like (LOC114162372), mRNA	1	Large subunit ribosomal protein L27Ae	DEO72_LG11g1364	Ribosome [03011]; Ribosome [03010]	GO:0003735~structural constituent of ribosome	GO:0006412~translation	GO:0015934~large ribosomal subunit
vun-miR171m-3p	XM_028046611.1	3.5	-1	1	21	1087	1107	UUGAGCCGCGUCAAUAUCUCA	AGUGAUAUUGGUUCGGCUCAA	Cleavage	PREDICTED: Vigna unguiculata nodulation-signaling pathway 2 protein (LOC114162655), mRNA	1	DELLA protein	DEO72_LG11g2810	NA	NA	NA	NA
vun-miR171m-3p	XM_028046666.1	4	-1	1	21	1423	1443	UUGAGCCGCGUCAAUAUCUCA	AAAGAUAUUGAUGCUGCCUAA	Cleavage	PREDICTED: Vigna unguiculata protein RICE SALT SENSITIVE 3-like (LOC114162706), mRNA	1	Transcription factor MYC/MYB N-terminal	DEO72_LG11g3522	NA	NA	NA	NA
vun-miR171m-3p	XM_028047630.1	4	-1	1	21	414	434	UUGAGCCGCGUCAAUAUCUCA	GGUGCUGUUGAUGCGGCUCGG	Cleavage	PREDICTED: Vigna unguiculata chaperone protein ClpB4, mitochondrial (LOC114163361), mRNA	1	ATP-dependent Clp protease ATP-binding subunit ClpB	DEO72_LG11g3309	Chaperones and folding catalysts [03110]	GO:0005524~ATP binding;GO:0008233~peptidase activity	GO:0009408~response to heat;GO:0042026~protein refolding	GO:0005737~cytoplasm
vun-miR171m-3p	XM_028048226.1	4	-1	1	21	439	459	UUGAGCCGCGUCAAUAUCUCA	GAAGGUAUUGAAGUGGCUUGG	Translation	PREDICTED: Vigna unguiculata probable serine/threonine-protein kinase WNK3 (LOC114163863), transcript variant X1, mRNA	1	Serine/threonine-protein kinase WN	DEO72_LG11g1398	Protein phosphatases and associated proteins [01009]; Protein kinases [01001]	GO:0004674~protein serine/threonine kinase activity;GO:0005524~ATP binding	NA	NA
vun-miR171m-3p	XM_028048227.1	4	-1	1	21	439	459	UUGAGCCGCGUCAAUAUCUCA	GAAGGUAUUGAAGUGGCUUGG	Translation	PREDICTED: Vigna unguiculata probable serine/threonine-protein kinase WNK3 (LOC114163863), transcript variant X2, mRNA	1	Serine/threonine-protein kinase WN	DEO72_LG11g1398	Protein phosphatases and associated proteins [01009]; Protein kinases [01001]	GO:0004674~protein serine/threonine kinase activity;GO:0005524~ATP binding	NA	NA
vun-miR171m-3p	XM_028048479.1	4.5	-1	1	21	1495	1515	UUGAGCCGCGUCAAUAUCUCA	GGAGAAAUUGAUUUGGCUCAC	Cleavage	PREDICTED: Vigna unguiculata probable serine/threonine-protein kinase mps1 (LOC114164023), transcript variant X1, mRNA	1	Serine/threonine-protein kinase TTK/MPS1	DEO72_LG11g2823	Protein kinases [01001]; Chromosome and associated proteins [03036]	GO:0004672~protein kinase activity;GO:0005524~ATP binding	NA	NA
vun-miR171m-3p	XM_028048480.1	4.5	-1	1	21	1432	1452	UUGAGCCGCGUCAAUAUCUCA	GGAGAAAUUGAUUUGGCUCAC	Cleavage	PREDICTED: Vigna unguiculata probable serine/threonine-protein kinase mps1 (LOC114164023), transcript variant X2, mRNA	1	Serine/threonine-protein kinase TTK/MPS1	DEO72_LG11g2823	Protein kinases [01001]; Chromosome and associated proteins [03036]	GO:0004672~protein kinase activity;GO:0005524~ATP binding	NA	NA
vun-miR171m-3p	XM_028048700.1	4	-1	1	21	7453	7473	UUGAGCCGCGUCAAUAUCUCA	GUCCAUGUUGACUCGGCUCAA	Cleavage	PREDICTED: Vigna unguiculata protein SABRE (LOC114164156), transcript variant X1, mRNA	1	FMP27 protein	DEO72_LG11g2943	NA	NA	NA	GO:0016021~integral component of membrane
vun-miR171m-3p	XM_028048701.1	4	-1	1	21	6304	6324	UUGAGCCGCGUCAAUAUCUCA	GUCCAUGUUGACUCGGCUCAA	Cleavage	PREDICTED: Vigna unguiculata protein SABRE (LOC114164156), transcript variant X2, mRNA	1	FMP27 protein	DEO72_LG11g2943	NA	NA	NA	GO:0016021~integral component of membrane
vun-miR171m-3p	XM_028048702.1	4	-1	1	21	6432	6452	UUGAGCCGCGUCAAUAUCUCA	GUCCAUGUUGACUCGGCUCAA	Cleavage	PREDICTED: Vigna unguiculata protein SABRE (LOC114164156), transcript variant X3, mRNA	1	FMP27 protein	DEO72_LG11g2943	NA	NA	NA	GO:0016021~integral component of membrane
vun-miR171m-3p	XM_028048703.1	4	-1	1	21	6083	6103	UUGAGCCGCGUCAAUAUCUCA	GUCCAUGUUGACUCGGCUCAA	Cleavage	PREDICTED: Vigna unguiculata protein SABRE (LOC114164156), transcript variant X4, mRNA	1	FMP27 protein	DEO72_LG11g2943	NA	NA	NA	GO:0016021~integral component of membrane
vun-miR171m-3p	XM_028048704.1	4	-1	1	21	5706	5726	UUGAGCCGCGUCAAUAUCUCA	GUCCAUGUUGACUCGGCUCAA	Cleavage	PREDICTED: Vigna unguiculata protein SABRE (LOC114164156), transcript variant X5, mRNA	1	FMP27 protein	DEO72_LG11g2943	NA	NA	NA	GO:0016021~integral component of membrane
vun-miR171m-3p	XM_028050190.1	5	-1	1	21	3576	3595	UUGAGCCGCGUCAAUAUCUCA	AGAGAUAU-GGCGUGGCUCAC	Cleavage	PREDICTED: Vigna unguiculata uncharacterized LOC114165608 (LOC114165608), mRNA	1	uncharacterized protein LOC106773145 isoform X1	LOC106773145	NA	GO:0043531~ADP binding	NA	NA
vun-miR171m-3p	XM_028050573.1	5	-1	1	21	988	1009	UUGAGCCG-CGUCAAUAUCUCA	UGACAUAUUGAUGAUGGCUCAA	Cleavage	PREDICTED: Vigna unguiculata anthranilate N-methyltransferase-like (LOC114165936), mRNA	1	Flavonol 3-O-methyltransferase	DEO72_LG8g492	NA	GO:0008171~O-methyltransferase activity;GO:0046983~protein dimerization activity	GO:0032259~methylation	GO:0016021~integral component of membrane
vun-miR171m-3p	XM_028050804.1	5	-1	1	21	1236	1256	UUGAGCCGCGUCAAUAUCUCA	UGAGAACUUGAGGCGACUCAA	Translation	PREDICTED: Vigna unguiculata uncharacterized LOC114166134 (LOC114166134), transcript variant X2, mRNA	1	Uncharacterized protein	DEO72_LG8g605	NA	NA	NA	GO:0016021~integral component of membrane
vun-miR171m-3p	XM_028051097.1	3.5	-1	1	21	1925	1945	UUGAGCCGCGUCAAUAUCUCA	UCAGGUCUUGGCGCGGCUAAA	Cleavage	PREDICTED: Vigna unguiculata TMV resistance protein N-like (LOC114166377), mRNA	1	TIR domain-containing protein	LR48_Vigan09g068100	NA	GO:0043531~ADP binding	GO:0007165~signal transduction	NA
vun-miR171m-3p	XM_028051131.1	5	-1	1	21	2523	2542	UUGAGCCGCGUCAAUAUCUCA	AGAGAUAU-GGCGUGGCUCAC	Cleavage	PREDICTED: Vigna unguiculata uncharacterized LOC114166403 (LOC114166403), mRNA	1	Disease resistance protein RPS2	DEO72_LG8g687	NA	GO:0043531~ADP binding	NA	NA
vun-miR171m-3p	XM_028051191.1	5	-1	1	21	2647	2666	UUGAGCCGCGUCAAUAUCUCA	AGAGAUAU-GGCGUGGCUCAC	Cleavage	PREDICTED: Vigna unguiculata uncharacterized LOC114166455 (LOC114166455), mRNA	1	Disease resistance protein RPS2	DEO72_LG8g687	NA	GO:0043531~ADP binding	NA	NA
vun-miR171m-3p	XM_028051509.1	1	-1	1	21	1762	1782	UUGAGCCGCGUCAAUAUCUCA	AGGGAUAUUGGCGCGGCUCAA	Cleavage	PREDICTED: Vigna unguiculata scarecrow-like protein 6 (LOC114166726), transcript variant X1, mRNA	1	DELLA protein	DEO72_LG8g1063	NA	NA	NA	NA
vun-miR171m-3p	XM_028051510.1	1	-1	1	21	1596	1616	UUGAGCCGCGUCAAUAUCUCA	AGGGAUAUUGGCGCGGCUCAA	Cleavage	PREDICTED: Vigna unguiculata scarecrow-like protein 6 (LOC114166726), transcript variant X2, mRNA	1	DELLA protein	DEO72_LG8g1063	NA	NA	NA	NA
vun-miR171m-3p	XM_028051511.1	1	-1	1	21	1593	1613	UUGAGCCGCGUCAAUAUCUCA	AGGGAUAUUGGCGCGGCUCAA	Cleavage	PREDICTED: Vigna unguiculata scarecrow-like protein 6 (LOC114166726), transcript variant X3, mRNA	1	DELLA protein	DEO72_LG8g1063	NA	NA	NA	NA
vun-miR171m-3p	XM_028051559.1	3.5	-1	1	21	3298	3318	UUGAGCCGCGUCAAUAUCUCA	CCAGGUCUUGGCGCGGCUAAA	Cleavage	PREDICTED: Vigna unguiculata TMV resistance protein N-like (LOC114166763), transcript variant X1, mRNA	1	TIR domain-containing protein	LR48_Vigan09g068100	NA	GO:0043531~ADP binding	GO:0007165~signal transduction	NA
vun-miR171m-3p	XM_028051560.1	3.5	-1	1	21	1900	1920	UUGAGCCGCGUCAAUAUCUCA	CCAGGUCUUGGCGCGGCUAAA	Cleavage	PREDICTED: Vigna unguiculata TMV resistance protein N-like (LOC114166763), transcript variant X2, mRNA	1	TIR domain-containing protein	LR48_Vigan09g068100	NA	GO:0043531~ADP binding	GO:0007165~signal transduction	NA
vun-miR171m-3p	XM_028051561.1	3.5	-1	1	21	1990	2010	UUGAGCCGCGUCAAUAUCUCA	CCAGGUCUUGGCGCGGCUAAA	Cleavage	PREDICTED: Vigna unguiculata TMV resistance protein N-like (LOC114166763), transcript variant X3, mRNA	1	TIR domain-containing protein	Vigan.01G271200 VIGAN_01271200	NA	GO:0043531~ADP binding	GO:0007165~signal transduction	NA
vun-miR171m-3p	XM_028051563.1	3.5	-1	1	21	1372	1392	UUGAGCCGCGUCAAUAUCUCA	CCAGGUCUUGGCGCGGCUAAA	Cleavage	PREDICTED: Vigna unguiculata TMV resistance protein N-like (LOC114166763), transcript variant X4, mRNA	1	TIR domain-containing protein	LR48_Vigan09g068100	NA	GO:0043531~ADP binding	GO:0007165~signal transduction	NA
vun-miR171m-3p	XM_028051564.1	3.5	-1	1	21	1282	1302	UUGAGCCGCGUCAAUAUCUCA	CCAGGUCUUGGCGCGGCUAAA	Cleavage	PREDICTED: Vigna unguiculata TMV resistance protein N-like (LOC114166763), transcript variant X5, mRNA	1	TIR domain-containing protein	LR48_Vigan09g068100	NA	GO:0043531~ADP binding	GO:0007165~signal transduction	NA
vun-miR171m-3p	XM_028051565.1	3.5	-1	1	21	1177	1197	UUGAGCCGCGUCAAUAUCUCA	CCAGGUCUUGGCGCGGCUAAA	Cleavage	PREDICTED: Vigna unguiculata TMV resistance protein N-like (LOC114166763), transcript variant X6, mRNA	1	TIR domain-containing protein	LR48_Vigan09g068100	NA	GO:0043531~ADP binding	GO:0007165~signal transduction	NA
vun-miR171m-3p	XM_028051566.1	3.5	-1	1	21	2515	2535	UUGAGCCGCGUCAAUAUCUCA	CCAGGUCUUGGCGCGGCUAAA	Cleavage	PREDICTED: Vigna unguiculata TMV resistance protein N-like (LOC114166764), transcript variant X1, mRNA	1	TIR domain-containing protein	Vigan.01G271200 VIGAN_01271200	NA	GO:0043531~ADP binding	GO:0007165~signal transduction	NA
vun-miR171m-3p	XM_028051567.1	3.5	-1	1	21	2515	2535	UUGAGCCGCGUCAAUAUCUCA	CCAGGUCUUGGCGCGGCUAAA	Cleavage	PREDICTED: Vigna unguiculata TMV resistance protein N-like (LOC114166764), transcript variant X2, mRNA	1	TIR domain-containing protein	Vigan.01G271200 VIGAN_01271200	NA	GO:0043531~ADP binding	GO:0007165~signal transduction	NA
vun-miR171m-3p	XM_028051568.1	3.5	-1	1	21	2512	2532	UUGAGCCGCGUCAAUAUCUCA	CCAGGUCUUGGCGCGGCUAAA	Cleavage	PREDICTED: Vigna unguiculata TMV resistance protein N-like (LOC114166764), transcript variant X3, mRNA	1	TIR domain-containing protein	Vigan.01G271200 VIGAN_01271200	NA	GO:0043531~ADP binding	GO:0007165~signal transduction	NA
vun-miR171m-3p	XM_028051569.1	3.5	-1	1	21	2424	2444	UUGAGCCGCGUCAAUAUCUCA	CCAGGUCUUGGCGCGGCUAAA	Cleavage	PREDICTED: Vigna unguiculata TMV resistance protein N-like (LOC114166764), transcript variant X4, mRNA	1	TIR domain-containing protein	Vigan.01G271200 VIGAN_01271200	NA	GO:0043531~ADP binding	GO:0007165~signal transduction	NA
vun-miR171m-3p	XM_028051570.1	3.5	-1	1	21	2516	2536	UUGAGCCGCGUCAAUAUCUCA	CCAGGUCUUGGCGCGGCUAAA	Cleavage	PREDICTED: Vigna unguiculata TMV resistance protein N-like (LOC114166764), transcript variant X5, mRNA	1	TIR domain-containing protein	Vigan.01G271200 VIGAN_01271200	NA	GO:0043531~ADP binding	GO:0007165~signal transduction	NA
vun-miR171m-3p	XM_028051571.1	3.5	-1	1	21	1372	1392	UUGAGCCGCGUCAAUAUCUCA	CCAGGUCUUGGCGCGGCUAAA	Cleavage	PREDICTED: Vigna unguiculata TMV resistance protein N-like (LOC114166764), transcript variant X6, mRNA	1	TIR domain-containing protein	LR48_Vigan09g068100	NA	GO:0043531~ADP binding	GO:0007165~signal transduction	NA
vun-miR171m-3p	XM_028051572.1	3.5	-1	1	21	1282	1302	UUGAGCCGCGUCAAUAUCUCA	CCAGGUCUUGGCGCGGCUAAA	Cleavage	PREDICTED: Vigna unguiculata TMV resistance protein N-like (LOC114166764), transcript variant X7, mRNA	1	TIR domain-containing protein	LR48_Vigan09g068100	NA	GO:0043531~ADP binding	GO:0007165~signal transduction	NA
vun-miR171m-3p	XM_028051574.1	3.5	-1	1	21	1177	1197	UUGAGCCGCGUCAAUAUCUCA	CCAGGUCUUGGCGCGGCUAAA	Cleavage	PREDICTED: Vigna unguiculata TMV resistance protein N-like (LOC114166764), transcript variant X8, mRNA	1	TIR domain-containing protein	LR48_Vigan09g068100	NA	GO:0043531~ADP binding	GO:0007165~signal transduction	NA
vun-miR171m-3p	XM_028051732.1	1	-1	1	21	1700	1720	UUGAGCCGCGUCAAUAUCUCA	AGGGAUAUUGGCGCGGCUCAA	Cleavage	PREDICTED: Vigna unguiculata scarecrow-like protein 6 (LOC114166860), transcript variant X2, mRNA	1	DELLA protein	DEO72_LG8g1061	NA	NA	NA	NA
vun-miR171m-3p	XM_028052598.1	4.5	-1	1	21	2772	2792	UUGAGCCGCGUCAAUAUCUCA	UCGGGUAUUGACUCGGGUCGA	Cleavage	PREDICTED: Vigna unguiculata homeobox-leucine zipper protein ANTHOCYANINLESS 2-like (LOC114167499), transcript variant X2, mRNA	1	Homeobox-leucine zipper protein	DEO72_LG8g822	Transcription factors [03000]	GO:0008289~lipid binding;GO:0043565~sequence-specific DNA binding	GO:0006355~regulation of transcription, DNA-templated	GO:0005634~nucleus
vun-miR171m-3p	XM_028053306.1	2.5	-1	1	21	1569	1589	UUGAGCCGCGUCAAUAUCUCA	GGCGAUAUUGACGAGGCUCAA	Cleavage	PREDICTED: Vigna unguiculata pentatricopeptide repeat-containing protein At4g37170-like (LOC114168470), mRNA	1	Cell division protease FtsH	DEO72_LG3g787	NA	GO:0008233~peptidase activity	GO:0051301~cell division	NA
vun-miR171m-3p	XM_028053309.1	2.5	-1	1	21	1185	1205	UUGAGCCGCGUCAAUAUCUCA	GGCGAUAUUGACGAGGCUCAA	Cleavage	PREDICTED: Vigna unguiculata pentatricopeptide repeat-containing protein At2g13600-like (LOC114168473), transcript variant X1, mRNA	1	Cell division protease FtsH	DEO72_LG3g787	NA	GO:0008233~peptidase activity	GO:0051301~cell division	NA
vun-miR171m-3p	XM_028053310.1	2.5	-1	1	21	1074	1094	UUGAGCCGCGUCAAUAUCUCA	GGCGAUAUUGACGAGGCUCAA	Cleavage	PREDICTED: Vigna unguiculata pentatricopeptide repeat-containing protein At2g13600-like (LOC114168473), transcript variant X2, mRNA	1	Cell division protease FtsH	DEO72_LG3g787	NA	GO:0008233~peptidase activity	GO:0051301~cell division	NA
vun-miR171m-3p	XM_028053715.1	3.5	-1	1	21	1385	1405	UUGAGCCGCGUCAAUAUCUCA	GCAGCUGUUGAUGCGGUUCAC	Cleavage	PREDICTED: Vigna unguiculata dynamin-related protein 5A-like (LOC114168774), transcript variant X1, mRNA	1	Uncharacterized protein	Ahy_B05g078854	NA	GO:0003924~GTPase activity;GO:0005525~GTP binding	GO:0006629~lipid metabolic process	NA
vun-miR171m-3p	XM_028053991.1	4.5	-1	1	21	918	938	UUGAGCCGCGUCAAUAUCUCA	UGAGAAAGUGGUGUGGUUCAG	Cleavage	PREDICTED: Vigna unguiculata uncharacterized LOC114168983 (LOC114168983), mRNA	1	Uncharacterized protein	DEO72_LG4g833	NA	NA	NA	NA
vun-miR171m-3p	XM_028054458.1	4	-1	1	21	193	213	UUGAGCCGCGUCAAUAUCUCA	GAAGAUAAUGGCGCGUCUCGG	Cleavage	PREDICTED: Vigna unguiculata adenylyl-sulfate kinase 3-like (LOC114169333), transcript variant X2, mRNA	1	Adenylyl-sulfate kinase (EC 2.7.1.25)	LOC106777070	PATHWAY: Sulfur metabolism; hydrogen sulfide biosynthesis; sulfite from sulfate: step 2/3. {ECO:0000256|RuleBase:RU004347}.; Sulfur metabolism [00920]; Purine metabolism [00230]	GO:0004020~adenylylsulfate kinase activity;GO:0005524~ATP binding	GO:0000103~sulfate assimilation;GO:0070814~hydrogen sulfide biosynthetic process	GO:0016021~integral component of membrane
vun-miR171m-3p	XM_028054562.1	4.5	-1	1	21	2658	2677	UUGAGCCGCGUCAAUAUCUCA	UGAGA-AUUGACAUGGCUCGA	Cleavage	PREDICTED: Vigna unguiculata uncharacterized LOC114169423 (LOC114169423), transcript variant X1, mRNA	1	Protein neuralized	DEO72_LG3g2652	NA	NA	NA	NA
vun-miR171m-3p	XM_028054563.1	4.5	-1	1	21	2658	2677	UUGAGCCGCGUCAAUAUCUCA	UGAGA-AUUGACAUGGCUCGA	Cleavage	PREDICTED: Vigna unguiculata uncharacterized LOC114169423 (LOC114169423), transcript variant X2, mRNA	1	Protein neuralized	DEO72_LG3g2652	NA	NA	NA	NA
vun-miR171m-3p	XM_028056973.1	4.5	-1	1	21	1173	1193	UUGAGCCGCGUCAAUAUCUCA	CGAGGUAUUGGUGUUGUUCGA	Cleavage	PREDICTED: Vigna unguiculata uncharacterized LOC114172638 (LOC114172638), mRNA	1	Uncharacterized protein	TSUD_411620	NA	GO:0003676~nucleic acid binding;GO:0004190~aspartic-type endopeptidase activity;GO:0008270~zinc ion binding	GO:0015074~DNA integration	NA
vun-miR171m-3p	XM_028056994.1	5	-1	1	21	75	96	UUGAGCCGCGUCAAUA-UCUCA	UGAGAAUGUUGAUGCGGUUGAA	Cleavage	PREDICTED: Vigna unguiculata zinc finger BED domain-containing protein RICESLEEPER 2-like (LOC114172664), mRNA	1	BED-type domain-containing protein	TSUD_300020	NA	GO:0003677~DNA binding;GO:0046983~protein dimerization activity	NA	NA
vun-miR171m-3p	XM_028057076.1	4	-1	1	21	1217	1237	UUGAGCCGCGUCAAUAUCUCA	GAGGAUAUUGACGUUGUUCGG	Cleavage	PREDICTED: Vigna unguiculata probable LRR receptor-like serine/threonine-protein kinase At1g12460 (LOC114172822), mRNA	1	Serine/threonine kinase	DEO72_LG4g2573	NA	GO:0004672~protein kinase activity;GO:0005524~ATP binding	NA	GO:0016021~integral component of membrane
vun-miR171m-3p	XM_028057107.1	3.5	-1	1	21	2492	2512	UUGAGCCGCGUCAAUAUCUCA	CCAGGUCUUGGCGCGGCUAAA	Cleavage	PREDICTED: Vigna unguiculata TMV resistance protein N-like (LOC114172942), transcript variant X1, mRNA	1	Retrovirus-related Pol polyprotein from transposon TNT 1-94 (Fragment)	KK1_040182	RNA polymerase [03020]; DNA repair and recombination proteins [03400]; Transcription machinery [03021]	GO:0003676~nucleic acid binding	GO:0015074~DNA integration	NA
vun-miR171m-3p	XM_028057108.1	3.5	-1	1	21	2492	2512	UUGAGCCGCGUCAAUAUCUCA	CCAGGUCUUGGCGCGGCUAAA	Cleavage	PREDICTED: Vigna unguiculata TMV resistance protein N-like (LOC114172942), transcript variant X2, mRNA	1	Retrovirus-related Pol polyprotein from transposon TNT 1-94 (Fragment)	KK1_040182	RNA polymerase [03020]; DNA repair and recombination proteins [03400]; Transcription machinery [03021]	GO:0003676~nucleic acid binding	GO:0015074~DNA integration	NA
vun-miR171m-3p	XM_028057109.1	3.5	-1	1	21	2489	2509	UUGAGCCGCGUCAAUAUCUCA	CCAGGUCUUGGCGCGGCUAAA	Cleavage	PREDICTED: Vigna unguiculata TMV resistance protein N-like (LOC114172942), transcript variant X3, mRNA	1	Retrovirus-related Pol polyprotein from transposon TNT 1-94 (Fragment)	KK1_040182	RNA polymerase [03020]; DNA repair and recombination proteins [03400]; Transcription machinery [03021]	GO:0003676~nucleic acid binding	GO:0015074~DNA integration	NA
vun-miR171m-3p	XM_028057110.1	3.5	-1	1	21	2401	2421	UUGAGCCGCGUCAAUAUCUCA	CCAGGUCUUGGCGCGGCUAAA	Cleavage	PREDICTED: Vigna unguiculata TMV resistance protein N-like (LOC114172942), transcript variant X4, mRNA	1	Retrovirus-related Pol polyprotein from transposon TNT 1-94 (Fragment)	KK1_040182	RNA polymerase [03020]; DNA repair and recombination proteins [03400]; Transcription machinery [03021]	GO:0003676~nucleic acid binding	GO:0015074~DNA integration	NA
vun-miR171m-3p	XM_028057111.1	3.5	-1	1	21	2494	2514	UUGAGCCGCGUCAAUAUCUCA	CCAGGUCUUGGCGCGGCUAAA	Cleavage	PREDICTED: Vigna unguiculata TMV resistance protein N-like (LOC114172942), transcript variant X5, mRNA	1	Retrovirus-related Pol polyprotein from transposon TNT 1-94 (Fragment)	KK1_040182	RNA polymerase [03020]; DNA repair and recombination proteins [03400]; Transcription machinery [03021]	GO:0003676~nucleic acid binding	GO:0015074~DNA integration	NA
vun-miR171m-3p	XM_028057112.1	3.5	-1	1	21	1372	1392	UUGAGCCGCGUCAAUAUCUCA	CCAGGUCUUGGCGCGGCUAAA	Cleavage	PREDICTED: Vigna unguiculata TMV resistance protein N-like (LOC114172942), transcript variant X6, mRNA	1	TIR domain-containing protein	LR48_Vigan09g068100	NA	GO:0043531~ADP binding	GO:0007165~signal transduction	NA
vun-miR171m-3p	XM_028057113.1	3.5	-1	1	21	1282	1302	UUGAGCCGCGUCAAUAUCUCA	CCAGGUCUUGGCGCGGCUAAA	Cleavage	PREDICTED: Vigna unguiculata TMV resistance protein N-like (LOC114172942), transcript variant X7, mRNA	1	TIR domain-containing protein	LR48_Vigan09g068100	NA	GO:0043531~ADP binding	GO:0007165~signal transduction	NA
vun-miR171m-3p	XM_028057114.1	3.5	-1	1	21	1177	1197	UUGAGCCGCGUCAAUAUCUCA	CCAGGUCUUGGCGCGGCUAAA	Cleavage	PREDICTED: Vigna unguiculata TMV resistance protein N-like (LOC114172942), transcript variant X8, mRNA	1	TIR domain-containing protein	Vigan.01G271200 VIGAN_01271200	NA	GO:0043531~ADP binding	GO:0007165~signal transduction	NA
vun-miR171m-3p	XM_028057210.1	4	-1	1	21	1036	1056	UUGAGCCGCGUCAAUAUCUCA	AUAGAUAUUGAUGUUGUUUAG	Cleavage	PREDICTED: Vigna unguiculata preprotein translocase subunit SECE1 (LOC114173020), mRNA	1	Uncharacterized protein	DEO72_LG4g2811	NA	NA	NA	GO:0016021~integral component of membrane
vun-miR171m-3p	XM_028057549.1	3.5	-1	1	21	405	425	UUGAGCCGCGUCAAUAUCUCA	AAAGAGAUUGAGGUGGCUCAG	Translation	PREDICTED: Vigna unguiculata BSD domain-containing protein C22A12.14c-like (LOC114173270), mRNA	1	BSD domain-containing protein	DEO72_LG6g2295	NA	NA	NA	NA
vun-miR171m-3p	XM_028057582.1	4.5	-1	1	21	66	86	UUGAGCCGCGUCAAUAUCUCA	AAAGAUAUGGGUGUGGCUGAA	Cleavage	PREDICTED: Vigna unguiculata MLP-like protein 328 (LOC114173294), mRNA	1	Bet_v_1 domain-containing protein	DEO72_LG4g908	NA	NA	GO:0006952~defense response	NA
vun-miR171m-3p	XM_028058065.1	4.5	-1	1	21	524	544	UUGAGCCGCGUCAAUAUCUCA	CGAGAUGUGGACCCGGCUCAC	Cleavage	PREDICTED: Vigna unguiculata hsp70-Hsp90 organizing protein 3-like (LOC114173579), mRNA	1	Stress-induced-phosphoprotein 1	DEO72_LG4g2549	Chaperones and folding catalysts [03110]	NA	NA	NA
vun-miR171m-3p	XM_028058126.1	3.5	-1	1	21	1428	1448	UUGAGCCGCGUCAAUAUCUCA	AAGGAUGUUGAAGUGGUUCAA	Translation	PREDICTED: Vigna unguiculata protein decapping 5 (LOC114173634), transcript variant X1, mRNA	1	TFG box	DEO72_LG4g665	Messenger RNA biogenesis [03019]	NA	NA	NA
vun-miR171m-3p	XM_028058127.1	3.5	-1	1	21	1427	1447	UUGAGCCGCGUCAAUAUCUCA	AAGGAUGUUGAAGUGGUUCAA	Translation	PREDICTED: Vigna unguiculata protein decapping 5 (LOC114173634), transcript variant X2, mRNA	1	TFG box	DEO72_LG4g665	Messenger RNA biogenesis [03019]	NA	NA	NA
vun-miR171m-3p	XM_028058168.1	4	-1	1	21	1332	1352	UUGAGCCGCGUCAAUAUCUCA	AAGGAUGUUGAAGUGGUUCAG	Translation	PREDICTED: Vigna unguiculata protein decapping 5-like (LOC114173661), mRNA	1	TFG box	DEO72_LG4g661	Messenger RNA biogenesis [03019]	NA	NA	NA
vun-miR171m-3p	XM_028059050.1	3	-1	1	21	752	772	UUGAGCCGCGUCAAUAUCUCA	GGUGAUAUUGGAGCGGCUCAA	Translation	PREDICTED: Vigna unguiculata scarecrow-like protein 15 (LOC114174251), mRNA	1	GRAS domain-containing protein	LR48_Vigan06g042400	NA	NA	NA	NA
vun-miR171m-3p	XM_028059080.1	4.5	-1	1	21	721	741	UUGAGCCGCGUCAAUAUCUCA	GGAGAUACUGACGUGAAUCAA	Cleavage	PREDICTED: Vigna unguiculata plectin (LOC114174268), mRNA	1	Uncharacterized protein	DEO72_LG4g86	NA	NA	NA	GO:0016021~integral component of membrane
vun-miR171m-3p	XM_028059826.1	4	-1	1	21	1576	1596	UUGAGCCGCGUCAAUAUCUCA	AUAGAUGUUGUUGAGGCUCAA	Translation	PREDICTED: Vigna unguiculata uncharacterized LOC114175067 (LOC114175067), mRNA	1	Retrovirus-related Pol polyprotein from transposon 17.6	KK1_020292	NA	GO:0003676~nucleic acid binding;GO:0004523~RNA-DNA hybrid ribonuclease activity;GO:0016491~oxidoreductase activity	GO:0015074~DNA integration	NA
vun-miR171m-3p	XM_028060582.1	5	-1	1	21	1066	1086	UUGAGCCGCGUCAAUAUCUCA	GGAGGGGUUGACGUGGCUCUG	Cleavage	PREDICTED: Vigna unguiculata protein CHROMATIN REMODELING 24 (LOC114175784), transcript variant X1, mRNA	1	DNA excision repair protein ERCC-6	DEO72_LG2g5216	Chromosome and associated proteins [03036]	GO:0005524~ATP binding	NA	NA
vun-miR171m-3p	XM_028060583.1	5	-1	1	21	1057	1077	UUGAGCCGCGUCAAUAUCUCA	GGAGGGGUUGACGUGGCUCUG	Cleavage	PREDICTED: Vigna unguiculata protein CHROMATIN REMODELING 24 (LOC114175784), transcript variant X2, mRNA	1	DNA excision repair protein ERCC-6	DEO72_LG2g5216	Chromosome and associated proteins [03036]	GO:0005524~ATP binding	NA	NA
vun-miR171m-3p	XM_028060584.1	5	-1	1	21	992	1012	UUGAGCCGCGUCAAUAUCUCA	GGAGGGGUUGACGUGGCUCUG	Cleavage	PREDICTED: Vigna unguiculata protein CHROMATIN REMODELING 24 (LOC114175784), transcript variant X3, mRNA	1	DNA excision repair protein ERCC-6	DEO72_LG2g5216	Chromosome and associated proteins [03036]	GO:0005524~ATP binding	NA	NA
vun-miR171m-3p	XM_028060613.1	4	-1	1	21	390	410	UUGAGCCGCGUCAAUAUCUCA	GAAUGUAUUGAUGUGGCUAAA	Cleavage	PREDICTED: Vigna unguiculata immune-associated nucleotide-binding protein 9-like (LOC114175805), mRNA	1	P-loop containing nucleoside triphosphate hydrolase	DEO72_LG6g97	NA	GO:0005525~GTP binding;GO:0016787~hydrolase activity	NA	NA
vun-miR171m-3p	XM_028061531.1	3.5	-1	1	21	1064	1084	UUGAGCCGCGUCAAUAUCUCA	GAAGACAUUGAUGCAGCUCAG	Cleavage	PREDICTED: Vigna unguiculata beta-glucosidase 40-like (LOC114176483), mRNA	1	Beta-glucosidase	DEO72_LG2g2946	Starch and sucrose metabolism [00500]; Cyanoamino acid metabolism [00460]; Phenylpropanoid biosynthesis [00940]	GO:0004553~hydrolase activity, hydrolyzing O-glycosyl compounds	GO:0005975~carbohydrate metabolic process	NA
vun-miR171m-3p	XM_028061779.1	4	-1	1	21	839	859	UUGAGCCGCGUCAAUAUCUCA	UCCCAUGUUGGCGCGGUUCGA	Cleavage	PREDICTED: Vigna unguiculata geraniol 8-hydroxylase-like (LOC114176670), mRNA	1	Flavonoid 3'-monooxygenase	DEO72_LG2g1538	Cytochrome P450 [00199]	GO:0004497~monooxygenase activity;GO:0005506~iron ion binding;GO:0016705~oxidoreductase activity, acting on paired donors, with incorporation or reduction of molecular oxygen;GO:0020037~heme binding	NA	GO:0016021~integral component of membrane
vun-miR171m-3p	XM_028062829.1	5	-1	1	21	987	1007	UUGAGCCGCGUCAAUAUCUCA	GAGGAUGUUGAUGUGGCUUUC	Cleavage	PREDICTED: Vigna unguiculata CBL-interacting serine/threonine-protein kinase 21 (LOC114177464), mRNA	1	Non-specific serine/threonine protein kinase (EC 2.7.11.1)	DEO72_LG2g737	NA	GO:0004674~protein serine/threonine kinase activity;GO:0005524~ATP binding	GO:0007165~signal transduction	NA
vun-miR171m-3p	XM_028063296.1	4.5	-1	1	21	500	520	UUGAGCCGCGUCAAUAUCUCA	ACUGAUAUUGACGUGCUUCAU	Cleavage	PREDICTED: Vigna unguiculata uncharacterized LOC114177777 (LOC114177777), mRNA	1	Uncharacterized protein	DEO72_LG2g4791	NA	NA	NA	GO:0016021~integral component of membrane
vun-miR171m-3p	XM_028063733.1	4	-1	1	21	2001	2021	UUGAGCCGCGUCAAUAUCUCA	GAAGAUCUUGGUGUGGUUCAC	Cleavage	PREDICTED: Vigna unguiculata protein NUCLEAR FUSION DEFECTIVE 4-like (LOC114178053), mRNA	1	Nodulin-like domain-containing protein	DEO72_LG2g2144	NA	NA	NA	GO:0016021~integral component of membrane
vun-miR171m-3p	XM_028063871.1	5	-1	1	21	987	1007	UUGAGCCGCGUCAAUAUCUCA	GGAGGUGUUGACCCUGCUCAC	Cleavage	PREDICTED: Vigna unguiculata aspartic proteinase-like (LOC114178140), mRNA	1	Aspartic proteinase (Phytepsin)	DEO72_LG2g72	Peptidases and inhibitors [01002]	GO:0004190~aspartic-type endopeptidase activity	GO:0006629~lipid metabolic process	NA
vun-miR171m-3p	XM_028064712.1	4	-1	1	21	7185	7205	UUGAGCCGCGUCAAUAUCUCA	GGGAAUCUUGACGUGGCUCAU	Cleavage	PREDICTED: Vigna unguiculata E3 ubiquitin-protein ligase UPL1-like (LOC114178672), transcript variant X1, mRNA	1	E3 ubiquitin-protein ligase HUWE1	DEO72_LG2g4137	Ubiquitin system [04121]; Ubiquitin mediated proteolysis [04120]	GO:0004842~ubiquitin-protein transferase activity	NA	NA
vun-miR171m-3p	XM_028064713.1	4	-1	1	21	7182	7202	UUGAGCCGCGUCAAUAUCUCA	GGGAAUCUUGACGUGGCUCAU	Cleavage	PREDICTED: Vigna unguiculata E3 ubiquitin-protein ligase UPL1-like (LOC114178672), transcript variant X2, mRNA	1	E3 ubiquitin-protein ligase HUWE1	DEO72_LG2g4137	Ubiquitin system [04121]; Ubiquitin mediated proteolysis [04120]	GO:0004842~ubiquitin-protein transferase activity	NA	NA
vun-miR171m-3p	XM_028064977.1	5	-1	1	21	1514	1534	UUGAGCCGCGUCAAUAUCUCA	UGGGAUUUUGAUGCAGUUCAU	Cleavage	PREDICTED: Vigna unguiculata uncharacterized LOC114178855 (LOC114178855), mRNA	1	Pheophorbide a oxygenase	DEO72_LG2g4800	NA	GO:0010277~chlorophyllide a oxygenase [overall] activity;GO:0016757~transferase activity, transferring glycosyl groups;GO:0051537~2 iron, 2 sulfur cluster binding	GO:0006004~fucose metabolic process	NA
vun-miR171m-3p	XM_028065240.1	5	-1	1	21	1026	1046	UUGAGCCGCGUCAAUAUCUCA	GGAGAUGUUGGAGCGGUUAGA	Translation	PREDICTED: Vigna unguiculata arogenate dehydrogenase 1, chloroplastic (LOC114179044), mRNA	1	Arogenate dehydrogenase	DEO72_LG2g1060	Phenylalanine, tyrosine and tryptophan biosynthesis [00400]	GO:0004665~prephenate dehydrogenase (NADP+) activity;GO:0008977~prephenate dehydrogenase activity	GO:0006571~tyrosine biosynthetic process	NA
vun-miR171m-3p	XM_028067172.1	4.5	-1	1	21	690	710	UUGAGCCGCGUCAAUAUCUCA	AAGGAUGUUGAUGUGGAUCAU	Cleavage	PREDICTED: Vigna unguiculata YTH domain-containing protein ECT2-like (LOC114180877), transcript variant X1, mRNA	1	YTH domain-containing protein	DEO72_LG6g834	Messenger RNA biogenesis [03019]	GO:0003723~RNA binding	NA	NA
vun-miR171m-3p	XM_028067179.1	4.5	-1	1	21	684	704	UUGAGCCGCGUCAAUAUCUCA	AAGGAUGUUGAUGUGGAUCAU	Cleavage	PREDICTED: Vigna unguiculata YTH domain-containing protein ECT2-like (LOC114180877), transcript variant X2, mRNA	1	YTH domain-containing protein	DEO72_LG6g834	Messenger RNA biogenesis [03019]	GO:0003723~RNA binding	NA	NA
vun-miR171m-3p	XM_028067184.1	4.5	-1	1	21	153	173	UUGAGCCGCGUCAAUAUCUCA	AAGGAUGUUGAUGUGGAUCAU	Cleavage	PREDICTED: Vigna unguiculata YTH domain-containing protein ECT2-like (LOC114180877), transcript variant X3, mRNA	1	YTH domain-containing protein	DEO72_LG6g834	Messenger RNA biogenesis [03019]	GO:0003723~RNA binding	NA	NA
vun-miR171m-3p	XM_028067301.1	5	-1	1	21	780	800	UUGAGCCGCGUCAAUAUCUCA	UGAAAUAUUGCUGCUGUUCAA	Translation	PREDICTED: Vigna unguiculata CASP-like protein 5A2 (LOC114180994), mRNA	1	Uncharacterized protein	DEO72_LG5g2354	NA	NA	NA	NA
vun-miR171m-3p	XM_028068892.1	4	-1	1	21	780	800	UUGAGCCGCGUCAAUAUCUCA	GGAGGAAUUGGUGAGGCUCAA	Cleavage	PREDICTED: Vigna unguiculata CRM-domain containing factor CFM3, chloroplastic/mitochondrial-like (LOC114182117), transcript variant X1, mRNA	1	RNA-binding	DEO72_LG2g1301	NA	GO:0003723~RNA binding	NA	NA
vun-miR171m-3p	XM_028068893.1	4	-1	1	21	780	800	UUGAGCCGCGUCAAUAUCUCA	GGAGGAAUUGGUGAGGCUCAA	Cleavage	PREDICTED: Vigna unguiculata CRM-domain containing factor CFM3, chloroplastic/mitochondrial-like (LOC114182117), transcript variant X2, mRNA	1	RNA-binding	DEO72_LG2g1301	NA	GO:0003723~RNA binding	NA	NA
vun-miR171m-3p	XM_028069301.1	4	-1	1	21	605	625	UUGAGCCGCGUCAAUAUCUCA	CUUGAUUUUGGUGUGGCUCAG	Cleavage	PREDICTED: Vigna unguiculata UDP-glycosyltransferase 74G1-like (LOC114182435), mRNA	1	Glycosyltransferase (EC 2.4.1.-)	DEO72_LG5g701	Glycosyltransferases [01003]	GO:0016758~transferase activity, transferring hexosyl groups	NA	NA
vun-miR171m-3p	XM_028069525.1	4.5	-1	1	21	1095	1115	UUGAGCCGCGUCAAUAUCUCA	GGAGAUUUUGACAAGGUUCAA	Cleavage	PREDICTED: Vigna unguiculata uncharacterized LOC114182623 (LOC114182623), mRNA	1	Uncharacterized protein	DEO72_LG5g2389	NA	NA	NA	NA
vun-miR171m-3p	XM_028069679.1	5	-1	1	21	278	298	UUGAGCCGCGUCAAUAUCUCA	UGGGACAUCGACGCUGCUCAG	Cleavage	PREDICTED: Vigna unguiculata elongation factor Ts, mitochondrial (LOC114182747), mRNA	1	Elongation factor Ts, mitochondrial (EF-Ts) (EF-TsMt)	EFTS DEO72_LG5g3263	NA	GO:0003746~translation elongation factor activity	NA	GO:0005739~mitochondrion
vun-miR171m-3p	XM_028070622.1	3.5	-1	1	21	1168	1188	UUGAGCCGCGUCAAUAUCUCA	AAGGAUGUUGAUGUGGCACAA	Cleavage	PREDICTED: Vigna unguiculata protein FAF-like, chloroplastic (LOC114183553), mRNA	1	The fantastic four family	DEO72_LG10g733	NA	NA	NA	NA
vun-miR171m-3p	XM_028071689.1	3.5	-1	1	21	2517	2537	UUGAGCCGCGUCAAUAUCUCA	UGAGACAUUGGUGGGGCUCAA	Cleavage	PREDICTED: Vigna unguiculata uncharacterized LOC114184376 (LOC114184376), mRNA	1	Uncharacterized protein	DEO72_LG10g349	NA	NA	NA	GO:0016021~integral component of membrane
vun-miR171m-3p	XM_028072324.1	1	-1	1	21	1605	1625	UUGAGCCGCGUCAAUAUCUCA	CGGGAUAUUGGCGCGGCUCAA	Cleavage	PREDICTED: Vigna unguiculata scarecrow-like protein 27 (LOC114184923), transcript variant X1, mRNA	1	DELLA protein	DEO72_LG10g1632	NA	NA	NA	NA
vun-miR171m-3p	XM_028072325.1	1	-1	1	21	1610	1630	UUGAGCCGCGUCAAUAUCUCA	CGGGAUAUUGGCGCGGCUCAA	Cleavage	PREDICTED: Vigna unguiculata scarecrow-like protein 27 (LOC114184923), transcript variant X2, mRNA	1	DELLA protein	DEO72_LG10g1632	NA	NA	NA	NA
vun-miR171m-3p	XM_028072326.1	1	-1	1	21	1644	1664	UUGAGCCGCGUCAAUAUCUCA	CGGGAUAUUGGCGCGGCUCAA	Cleavage	PREDICTED: Vigna unguiculata scarecrow-like protein 27 (LOC114184923), transcript variant X3, mRNA	1	DELLA protein	DEO72_LG10g1632	NA	NA	NA	NA
vun-miR171m-3p	XM_028072383.1	3.5	-1	1	21	1824	1844	UUGAGCCGCGUCAAUAUCUCA	CCAGAUAUUGAUGCAGUUCAU	Cleavage	PREDICTED: Vigna unguiculata ETHYLENE INSENSITIVE 3-like 3 protein (LOC114184958), transcript variant X1, mRNA	1	ETHYLENE INSENSITIVE 3-like 3 protein isoform X1	LOC106759455	MAPK signaling pathway - plant [04016]; Plant hormone signal transduction [04075]; Transcription factors [03000]	GO:0003700~sequence-specific DNA binding transcription factor activity	NA	GO:0005634~nucleus
vun-miR171m-3p	XM_028072384.1	3.5	-1	1	21	1824	1844	UUGAGCCGCGUCAAUAUCUCA	CCAGAUAUUGAUGCAGUUCAU	Cleavage	PREDICTED: Vigna unguiculata ETHYLENE INSENSITIVE 3-like 3 protein (LOC114184958), transcript variant X2, mRNA	1	ETHYLENE INSENSITIVE 3-like 3 protein isoform X1	LOC106759455	MAPK signaling pathway - plant [04016]; Plant hormone signal transduction [04075]; Transcription factors [03000]	GO:0003700~sequence-specific DNA binding transcription factor activity	NA	GO:0005634~nucleus
vun-miR171m-3p	XM_028073166.1	4.5	-1	1	21	1487	1507	UUGAGCCGCGUCAAUAUCUCA	UCAGAUAUUGAUGCUGAUCAU	Cleavage	PREDICTED: Vigna unguiculata uncharacterized LOC114185444 (LOC114185444), mRNA	1	Uncharacterized protein	DEO72_LG10g3068	NA	NA	NA	NA
vun-miR171m-3p	XM_028074011.1	4.5	-1	1	21	3162	3182	UUGAGCCGCGUCAAUAUCUCA	UCGGGUAUUGACUCGGGUCGA	Cleavage	PREDICTED: Vigna unguiculata homeobox-leucine zipper protein ANTHOCYANINLESS 2-like (LOC114186019), mRNA	1	Homeobox-leucine zipper protein	DEO72_LG10g3465	Transcription factors [03000]	GO:0008289~lipid binding;GO:0043565~sequence-specific DNA binding	GO:0006355~regulation of transcription, DNA-templated	GO:0005634~nucleus
vun-miR171m-3p	XM_028074300.1	4.5	-1	1	21	2787	2807	UUGAGCCGCGUCAAUAUCUCA	UCAGAUAUUAGCUUGGCUUAA	Cleavage	PREDICTED: Vigna unguiculata receptor-like protein 7 (LOC114186257), mRNA	1	LRRNT_2 domain-containing protein	Vigan.04G053600 VIGAN_04053600	NA	NA	NA	GO:0016021~integral component of membrane
vun-miR171m-3p	XM_028076342.1	3.5	-1	1	21	2075	2095	UUGAGCCGCGUCAAUAUCUCA	GUGGAUAUUGAAGCAGCUCAA	Translation	PREDICTED: Vigna unguiculata transcription factor bHLH13-like (LOC114187922), mRNA	1	Transcription factor MYC2	DEO72_LG1g1146	NA	GO:0046983~protein dimerization activity	NA	NA
vun-miR171m-3p	XM_028076401.1	5	-1	1	21	1664	1684	UUGAGCCGCGUCAAUAUCUCA	GGGGAUAUUGAUGAAGCUCAC	Cleavage	PREDICTED: Vigna unguiculata pentatricopeptide repeat-containing protein At1g51965, mitochondrial (LOC114187954), mRNA	1	Structure-specific endonuclease subunit SLX1	DEO72_LG1g1004	NA	GO:0004519~endonuclease activity	NA	NA
vun-miR171m-3p	XM_028076486.1	3	-1	1	21	2832	2852	UUGAGCCGCGUCAAUAUCUCA	UGAGGGAAUGACGUGGCUCAA	Cleavage	PREDICTED: Vigna unguiculata katanin p80 WD40 repeat-containing subunit B1 homolog (LOC114188012), transcript variant X1, mRNA	1	Katanin p80 WD40 repeat-containing subunit B1 homolog	DEO72_LG1g325	Cytoskeleton proteins [04812]	GO:0008017~microtubule binding;GO:0016301~kinase activity	GO:0051013~microtubule severing	GO:0005737~cytoplasm;GO:0005874~microtubule;GO:0008352~katanin complex
vun-miR171m-3p	XM_028076487.1	3	-1	1	21	2513	2533	UUGAGCCGCGUCAAUAUCUCA	UGAGGGAAUGACGUGGCUCAA	Cleavage	PREDICTED: Vigna unguiculata katanin p80 WD40 repeat-containing subunit B1 homolog (LOC114188012), transcript variant X2, mRNA	1	Katanin p80 WD40 repeat-containing subunit B1 homolog	DEO72_LG1g325	Cytoskeleton proteins [04812]	GO:0008017~microtubule binding;GO:0016301~kinase activity	GO:0051013~microtubule severing	GO:0005737~cytoplasm;GO:0005874~microtubule;GO:0008352~katanin complex
vun-miR171m-3p	XM_028077927.1	5	-1	1	21	428	449	UUGAGC-CGCGUCAAUAUCUCA	AGAGAUGUUGAUGUGAGUUCAA	Cleavage	PREDICTED: Vigna unguiculata 28 kDa heat- and acid-stable phosphoprotein (LOC114189215), transcript variant X1, mRNA	1	Casein kinase substrate	DEO72_LG1g435	NA	GO:0016301~kinase activity	NA	NA
vun-miR171m-3p	XM_028078230.1	4.5	-1	1	21	894	914	UUGAGCCGCGUCAAUAUCUCA	GCGUGUAUUGAUGCUGCUCAA	Cleavage	PREDICTED: Vigna unguiculata ATP-dependent DNA helicase SRS2-like protein At4g25120 (LOC114189612), transcript variant X1, mRNA	1	Retrovirus-related Pol polyprotein from transposon TNT 1-94	KK1_019599	NA	GO:0003676~nucleic acid binding	GO:0015074~DNA integration	NA
vun-miR171m-3p	XM_028078231.1	4.5	-1	1	21	894	914	UUGAGCCGCGUCAAUAUCUCA	GCGUGUAUUGAUGCUGCUCAA	Cleavage	PREDICTED: Vigna unguiculata ATP-dependent DNA helicase SRS2-like protein At4g25120 (LOC114189612), transcript variant X2, mRNA	1	Retrovirus-related Pol polyprotein from transposon TNT 1-94	KK1_019599	NA	GO:0003676~nucleic acid binding	GO:0015074~DNA integration	NA
vun-miR171m-3p	XM_028078955.1	4.5	-1	1	21	931	951	UUGAGCCGCGUCAAUAUCUCA	AAGGAUGUCGAUGCGGCACAA	Cleavage	PREDICTED: Vigna unguiculata protein PTST, chloroplastic (LOC114189972), transcript variant X4, mRNA	1	5'-AMP-activated protein kinase	DEO72_LG6g3192	NA	GO:0016301~kinase activity	NA	NA
vun-miR171m-3p	XM_028079023.1	4.5	-1	1	21	882	902	UUGAGCCGCGUCAAUAUCUCA	AAGGAUGUCGAUGCGGCACAA	Cleavage	PREDICTED: Vigna unguiculata protein PTST, chloroplastic (LOC114189972), transcript variant X5, mRNA	1	5'-AMP-activated protein kinase	DEO72_LG6g3192	NA	GO:0016301~kinase activity	NA	NA
vun-miR171m-3p	XM_028079093.1	4.5	-1	1	21	929	949	UUGAGCCGCGUCAAUAUCUCA	AAGGAUGUCGAUGCGGCACAA	Cleavage	PREDICTED: Vigna unguiculata protein PTST, chloroplastic (LOC114189972), transcript variant X6, mRNA	1	5'-AMP-activated protein kinase	DEO72_LG6g3192	NA	GO:0016301~kinase activity	NA	NA
vun-miR171m-3p	XM_028079313.1	4.5	-1	1	21	870	890	UUGAGCCGCGUCAAUAUCUCA	AAGGAUGUCGAUGCGGCACAA	Cleavage	PREDICTED: Vigna unguiculata protein PTST, chloroplastic (LOC114189972), transcript variant X9, mRNA	1	5'-AMP-activated protein kinase	DEO72_LG6g3192	NA	GO:0016301~kinase activity	NA	NA
vun-miR171m-3p	XM_028079335.1	5	-1	1	21	435	455	UUGAGCCGCGUCAAUAUCUCA	UGAGAUCGUGAUGGGGCUUGA	Cleavage	PREDICTED: Vigna unguiculata acyl carrier protein 1, chloroplastic-like (LOC114190448), mRNA	1	Carrier domain-containing protein (Fragment)	B296_00047732	NA	NA	NA	NA
vun-miR171m-3p	XM_028079627.1	3.5	-1	1	21	750	770	UUGAGCCGCGUCAAUAUCUCA	UGGGACAUUGACGCUGCUCAG	Cleavage	PREDICTED: Vigna unguiculata elongation factor Ts, mitochondrial-like (LOC114190659), transcript variant X1, mRNA	1	Elongation factor Ts	DEO72_LG9g2420	NA	GO:0003746~translation elongation factor activity	NA	NA
vun-miR171m-3p	XM_028079628.1	3.5	-1	1	21	743	763	UUGAGCCGCGUCAAUAUCUCA	UGGGACAUUGACGCUGCUCAG	Cleavage	PREDICTED: Vigna unguiculata elongation factor Ts, mitochondrial-like (LOC114190659), transcript variant X3, mRNA	1	Elongation factor Ts	DEO72_LG9g2420	NA	GO:0003746~translation elongation factor activity	NA	NA
vun-miR171m-3p	XM_028080315.1	4.5	-1	1	21	303	323	UUGAGCCGCGUCAAUAUCUCA	GGAGGUAUUGUCGUGGUUCCA	Translation	PREDICTED: Vigna unguiculata uncharacterized LOC114191129 (LOC114191129), mRNA	1	Transposon Ty3-I Gag-Pol polyprotein	KK1_029624	NA	NA	NA	NA
vun-miR171m-3p	XM_028080768.1	4	-1	1	21	2625	2645	UUGAGCCGCGUCAAUAUCUCA	UGUGGUAUUGACAUGGUUCAA	Cleavage	PREDICTED: Vigna unguiculata receptor protein kinase-like protein At4g34220 (LOC114191542), mRNA	1	Protein brassinosteroid insensitive 1	DEO72_LG9g3520	NA	GO:0004672~protein kinase activity;GO:0005524~ATP binding	NA	GO:0016021~integral component of membrane
vun-miR171m-3p	XM_028081373.1	2.5	-1	1	21	85	105	UUGAGCCGCGUCAAUAUCUCA	AGAGAGGUUGGCGCGGCUCAG	Cleavage	PREDICTED: Vigna unguiculata uncharacterized LOC114191919 (LOC114191919), mRNA	1	Uncharacterized protein	DEO72_LG9g432	NA	NA	NA	GO:0016021~integral component of membrane
vun-miR171m-3p	XM_028081438.1	4.5	-1	1	21	647	667	UUGAGCCGCGUCAAUAUCUCA	AAAGGUGUUGAUGCGGUACAC	Cleavage	PREDICTED: Vigna unguiculata uncharacterized LOC114191959 (LOC114191959), transcript variant X1, mRNA	1	CCHC-type domain-containing protein	D0Y65_052214	NA	GO:0003676~nucleic acid binding;GO:0008270~zinc ion binding	NA	NA
vun-miR171m-3p	XM_028081446.1	4.5	-1	1	21	647	667	UUGAGCCGCGUCAAUAUCUCA	AAAGGUGUUGAUGCGGUACAC	Cleavage	PREDICTED: Vigna unguiculata uncharacterized LOC114191959 (LOC114191959), transcript variant X2, mRNA	1	CCHC-type domain-containing protein	D0Y65_052214	NA	GO:0003676~nucleic acid binding;GO:0008270~zinc ion binding	NA	NA
vun-miR171m-3p	XM_028081762.1	4.5	-1	1	21	1188	1208	UUGAGCCGCGUCAAUAUCUCA	AGAGGUGGUGGAGUGGCUCAA	Translation	PREDICTED: Vigna unguiculata PTI1-like tyrosine-protein kinase At3g15890 (LOC114192145), transcript variant X1, mRNA	1	Serine/threonine-protein kinase PBS1	DEO72_LG9g3292	NA	GO:0004672~protein kinase activity;GO:0005524~ATP binding	NA	NA
vun-miR171m-3p	XM_028081763.1	4.5	-1	1	21	1182	1202	UUGAGCCGCGUCAAUAUCUCA	AGAGGUGGUGGAGUGGCUCAA	Translation	PREDICTED: Vigna unguiculata PTI1-like tyrosine-protein kinase At3g15890 (LOC114192145), transcript variant X2, mRNA	1	Serine/threonine-protein kinase PBS1	DEO72_LG9g3292	NA	GO:0004672~protein kinase activity;GO:0005524~ATP binding	NA	NA
vun-miR171m-3p	XM_028082465.1	4.5	-1	1	21	1370	1390	UUGAGCCGCGUCAAUAUCUCA	GGGGAUACUGAUGCUGUUCAG	Cleavage	PREDICTED: Vigna unguiculata phytochrome A (LOC114192684), transcript variant X1, mRNA	1	Phytochrome	DEO72_LG9g2215	Circadian rhythm - plant [04712]	GO:0000155~phosphorelay sensor kinase activity;GO:0009881~photoreceptor activity;GO:0042803~protein homodimerization activity	GO:0006355~regulation of transcription, DNA-templated;GO:0009584~detection of visible light;GO:0009585~red, far-red light phototransduction;GO:0017006~protein-tetrapyrrole linkage;GO:0018298~protein-chromophore linkage	NA
vun-miR171m-3p	XM_028082466.1	4.5	-1	1	21	1515	1535	UUGAGCCGCGUCAAUAUCUCA	GGGGAUACUGAUGCUGUUCAG	Cleavage	PREDICTED: Vigna unguiculata phytochrome A (LOC114192684), transcript variant X2, mRNA	1	Phytochrome	DEO72_LG9g2215	Circadian rhythm - plant [04712]	GO:0000155~phosphorelay sensor kinase activity;GO:0009881~photoreceptor activity;GO:0042803~protein homodimerization activity	GO:0006355~regulation of transcription, DNA-templated;GO:0009584~detection of visible light;GO:0009585~red, far-red light phototransduction;GO:0017006~protein-tetrapyrrole linkage;GO:0018298~protein-chromophore linkage	NA
vun-miR171m-3p	XM_028083327.1	3.5	-1	1	21	506	526	UUGAGCCGCGUCAAUAUCUCA	AGUGAUAUUGGUUCGGCUCAA	Cleavage	PREDICTED: Vigna unguiculata nodulation-signaling pathway 2 protein-like (LOC114193500), mRNA	1	DELLA protein	DEO72_LG7g1636	NA	NA	NA	NA
vun-miR171m-3p	XM_028085837.1	4.5	-1	1	21	116	136	UUGAGCCGCGUCAAUAUCUCA	AGAGAGAUUGAUGUGAUUUAA	Cleavage	PREDICTED: Vigna unguiculata probable serine/threonine-protein kinase PBL21 (LOC114195385), mRNA	1	Serine/threonine-protein kinase PBS1	DEO72_LG7g46	NA	GO:0004672~protein kinase activity;GO:0005524~ATP binding	NA	NA
vun-miR171m-3p	XM_028085987.1	5	-1	1	21	1086	1106	UUGAGCCGCGUCAAUAUCUCA	AGAGGUGUUGAUGCAGCUGAG	Cleavage	PREDICTED: Vigna unguiculata general transcription and DNA repair factor IIH subunit TFB2-like (LOC114195497), mRNA	1	RNA polymerase II transcription factor B subunit 2	DEO72_LG7g31	Basal transcription factors [03022]; DNA repair and recombination proteins [03400]; Transcription machinery [03021]; Nucleotide excision repair [03420]	GO:0001671~ATPase activator activity;GO:0003743~translation initiation factor activity	GO:0006289~nucleotide-excision repair	GO:0000439~core TFIIH complex
vun-miR171m-3p	XM_028086518.1	4	-1	1	21	172	192	UUGAGCCGCGUCAAUAUCUCA	GAAGAAGUUAACGUGGUUCAA	Cleavage	PREDICTED: Vigna unguiculata guanosine deaminase-like (LOC114196027), mRNA	1	CMP/dCMP-type deaminase domain-containing protein	Ahy_A09g044307	NA	GO:0003824~catalytic activity	NA	NA
vun-miR171m-3p	XM_028086519.1	4	-1	1	21	50	70	UUGAGCCGCGUCAAUAUCUCA	GAAGAAGUUAACGUGGUUCAA	Cleavage	PREDICTED: Vigna unguiculata guanosine deaminase-like (LOC114196028), transcript variant X1, mRNA	1	Guanine deaminase	DEO72_LG11g775	NA	GO:0008270~zinc ion binding;GO:0016787~hydrolase activity	NA	NA
vun-miR171m-3p	XM_028086521.1	4	-1	1	21	50	70	UUGAGCCGCGUCAAUAUCUCA	GAAGAAGUUAACGUGGUUCAA	Cleavage	PREDICTED: Vigna unguiculata guanosine deaminase-like (LOC114196028), transcript variant X2, mRNA	1	Guanine deaminase	DEO72_LG11g775	NA	GO:0008270~zinc ion binding;GO:0016787~hydrolase activity	NA	NA
vun-miR171m-3p	XM_028086752.1	4.5	-1	1	21	787	807	UUGAGCCGCGUCAAUAUCUCA	ACUGAUAUUGAUGCGGCAGAA	Cleavage	PREDICTED: Vigna unguiculata uncharacterized LOC114196189 (LOC114196189), mRNA	1	Uncharacterized protein	DEO72_LG11g3287	NA	NA	NA	GO:0016021~integral component of membrane
vun-miR171m-3p	XR_003599372.1	3.5	-1	1	21	536	556	UUGAGCCGCGUCAAUAUCUCA	AGUGAUAUUGGUUCGGCUCAA	Cleavage	PREDICTED: Vigna unguiculata pentatricopeptide repeat-containing protein At3g62890-like (LOC114163153), transcript variant X4, misc_RNA	1	NA	NA	NA	NA	NA	NA
vun-miR171m-3p	XR_003599373.1	3.5	-1	1	21	536	556	UUGAGCCGCGUCAAUAUCUCA	AGUGAUAUUGGUUCGGCUCAA	Cleavage	PREDICTED: Vigna unguiculata pentatricopeptide repeat-containing protein At3g62890-like (LOC114163153), transcript variant X5, misc_RNA	1	NA	NA	NA	NA	NA	NA
vun-miR171m-3p	XR_003599374.1	3.5	-1	1	21	536	556	UUGAGCCGCGUCAAUAUCUCA	AGUGAUAUUGGUUCGGCUCAA	Cleavage	PREDICTED: Vigna unguiculata pentatricopeptide repeat-containing protein At3g62890-like (LOC114163153), transcript variant X6, misc_RNA	1	NA	NA	NA	NA	NA	NA
vun-miR171m-3p	XR_003599375.1	3.5	-1	1	21	536	556	UUGAGCCGCGUCAAUAUCUCA	AGUGAUAUUGGUUCGGCUCAA	Cleavage	PREDICTED: Vigna unguiculata pentatricopeptide repeat-containing protein At3g62890-like (LOC114163153), transcript variant X7, misc_RNA	1	NA	NA	NA	NA	NA	NA
vun-miR171m-3p	XR_003600030.1	1	-1	1	21	1700	1720	UUGAGCCGCGUCAAUAUCUCA	AGGGAUAUUGGCGCGGCUCAA	Cleavage	PREDICTED: Vigna unguiculata scarecrow-like protein 6 (LOC114166860), transcript variant X1, misc_RNA	1	NA	NA	NA	NA	NA	NA
vun-miR171m-3p	XR_003605837.1	3.5	-1	1	21	750	770	UUGAGCCGCGUCAAUAUCUCA	UGGGACAUUGACGCUGCUCAG	Cleavage	PREDICTED: Vigna unguiculata elongation factor Ts, mitochondrial-like (LOC114190659), transcript variant X2, misc_RNA	1	NA	NA	NA	NA	NA	NA
vun-miR171m-3p	XR_003606609.1	4	-1	1	21	50	70	UUGAGCCGCGUCAAUAUCUCA	GAAGAAGUUAACGUGGUUCAA	Cleavage	PREDICTED: Vigna unguiculata guanosine deaminase-like (LOC114196028), transcript variant X3, misc_RNA	1	NA	NA	NA	NA	NA	NA
vun-miR171m-3p	XM_028046241.1	3.5	-1	1	20	72	91	UUGAGCCGCGUCAAUAUCUC	AAGAUGACGACGCGGUUCAA	Cleavage	PREDICTED: Vigna unguiculata 60S ribosomal protein L27a-3-like (LOC114162372), mRNA	1	Large subunit ribosomal protein L27Ae	DEO72_LG11g1364	Ribosome [03011]; Ribosome [03010]	GO:0003735~structural constituent of ribosome	GO:0006412~translation	GO:0015934~large ribosomal subunit
vun-miR171m-3p	XM_028046261.1	4.5	-1	1	20	116	135	UUGAGCCGCGUCAAUAUCUC	UGGAUGUUGCCGCGUUUCAA	Translation	PREDICTED: Vigna unguiculata RNA pseudouridine synthase 2, chloroplastic (LOC114162392), mRNA	1	Ribosomal large subunit pseudouridine synthase D	DEO72_LG11g3736	Ribosome biogenesis [03009]	GO:0003723~RNA binding;GO:0009982~pseudouridine synthase activity	GO:0001522~pseudouridine synthesis	NA
vun-miR171m-3p	XM_028046611.1	3.5	-1	1	20	1088	1107	UUGAGCCGCGUCAAUAUCUC	GUGAUAUUGGUUCGGCUCAA	Cleavage	PREDICTED: Vigna unguiculata nodulation-signaling pathway 2 protein (LOC114162655), mRNA	1	DELLA protein	DEO72_LG11g2810	NA	NA	NA	NA
vun-miR171m-3p	XM_028046666.1	4	-1	1	20	1424	1443	UUGAGCCGCGUCAAUAUCUC	AAGAUAUUGAUGCUGCCUAA	Cleavage	PREDICTED: Vigna unguiculata protein RICE SALT SENSITIVE 3-like (LOC114162706), mRNA	1	Transcription factor MYC/MYB N-terminal	DEO72_LG11g3522	NA	NA	NA	NA
vun-miR171m-3p	XM_028047630.1	4	-1	1	20	415	434	UUGAGCCGCGUCAAUAUCUC	GUGCUGUUGAUGCGGCUCGG	Cleavage	PREDICTED: Vigna unguiculata chaperone protein ClpB4, mitochondrial (LOC114163361), mRNA	1	ATP-dependent Clp protease ATP-binding subunit ClpB	DEO72_LG11g3309	Chaperones and folding catalysts [03110]	GO:0005524~ATP binding;GO:0008233~peptidase activity	GO:0009408~response to heat;GO:0042026~protein refolding	GO:0005737~cytoplasm
vun-miR171m-3p	XM_028048226.1	4	-1	1	20	440	459	UUGAGCCGCGUCAAUAUCUC	AAGGUAUUGAAGUGGCUUGG	Translation	PREDICTED: Vigna unguiculata probable serine/threonine-protein kinase WNK3 (LOC114163863), transcript variant X1, mRNA	1	Serine/threonine-protein kinase WN	DEO72_LG11g1398	Protein phosphatases and associated proteins [01009]; Protein kinases [01001]	GO:0004674~protein serine/threonine kinase activity;GO:0005524~ATP binding	NA	NA
vun-miR171m-3p	XM_028048227.1	4	-1	1	20	440	459	UUGAGCCGCGUCAAUAUCUC	AAGGUAUUGAAGUGGCUUGG	Translation	PREDICTED: Vigna unguiculata probable serine/threonine-protein kinase WNK3 (LOC114163863), transcript variant X2, mRNA	1	Serine/threonine-protein kinase WN	DEO72_LG11g1398	Protein phosphatases and associated proteins [01009]; Protein kinases [01001]	GO:0004674~protein serine/threonine kinase activity;GO:0005524~ATP binding	NA	NA
vun-miR171m-3p	XM_028048479.1	4.5	-1	1	20	1496	1515	UUGAGCCGCGUCAAUAUCUC	GAGAAAUUGAUUUGGCUCAC	Cleavage	PREDICTED: Vigna unguiculata probable serine/threonine-protein kinase mps1 (LOC114164023), transcript variant X1, mRNA	1	Serine/threonine-protein kinase TTK/MPS1	DEO72_LG11g2823	Protein kinases [01001]; Chromosome and associated proteins [03036]	GO:0004672~protein kinase activity;GO:0005524~ATP binding	NA	NA
vun-miR171m-3p	XM_028048480.1	4.5	-1	1	20	1433	1452	UUGAGCCGCGUCAAUAUCUC	GAGAAAUUGAUUUGGCUCAC	Cleavage	PREDICTED: Vigna unguiculata probable serine/threonine-protein kinase mps1 (LOC114164023), transcript variant X2, mRNA	1	Serine/threonine-protein kinase TTK/MPS1	DEO72_LG11g2823	Protein kinases [01001]; Chromosome and associated proteins [03036]	GO:0004672~protein kinase activity;GO:0005524~ATP binding	NA	NA
vun-miR171m-3p	XM_028048700.1	4	-1	1	20	7454	7473	UUGAGCCGCGUCAAUAUCUC	UCCAUGUUGACUCGGCUCAA	Cleavage	PREDICTED: Vigna unguiculata protein SABRE (LOC114164156), transcript variant X1, mRNA	1	FMP27 protein	DEO72_LG11g2943	NA	NA	NA	GO:0016021~integral component of membrane
vun-miR171m-3p	XM_028048701.1	4	-1	1	20	6305	6324	UUGAGCCGCGUCAAUAUCUC	UCCAUGUUGACUCGGCUCAA	Cleavage	PREDICTED: Vigna unguiculata protein SABRE (LOC114164156), transcript variant X2, mRNA	1	FMP27 protein	DEO72_LG11g2943	NA	NA	NA	GO:0016021~integral component of membrane
vun-miR171m-3p	XM_028048702.1	4	-1	1	20	6433	6452	UUGAGCCGCGUCAAUAUCUC	UCCAUGUUGACUCGGCUCAA	Cleavage	PREDICTED: Vigna unguiculata protein SABRE (LOC114164156), transcript variant X3, mRNA	1	FMP27 protein	DEO72_LG11g2943	NA	NA	NA	GO:0016021~integral component of membrane
vun-miR171m-3p	XM_028048703.1	4	-1	1	20	6084	6103	UUGAGCCGCGUCAAUAUCUC	UCCAUGUUGACUCGGCUCAA	Cleavage	PREDICTED: Vigna unguiculata protein SABRE (LOC114164156), transcript variant X4, mRNA	1	FMP27 protein	DEO72_LG11g2943	NA	NA	NA	GO:0016021~integral component of membrane
vun-miR171m-3p	XM_028048704.1	4	-1	1	20	5707	5726	UUGAGCCGCGUCAAUAUCUC	UCCAUGUUGACUCGGCUCAA	Cleavage	PREDICTED: Vigna unguiculata protein SABRE (LOC114164156), transcript variant X5, mRNA	1	FMP27 protein	DEO72_LG11g2943	NA	NA	NA	GO:0016021~integral component of membrane
vun-miR171m-3p	XM_028050190.1	5	-1	1	20	3577	3595	UUGAGCCGCGUCAAUAUCUC	GAGAUAU-GGCGUGGCUCAC	Cleavage	PREDICTED: Vigna unguiculata uncharacterized LOC114165608 (LOC114165608), mRNA	1	uncharacterized protein LOC106773145 isoform X1	LOC106773145	NA	GO:0043531~ADP binding	NA	NA
vun-miR171m-3p	XM_028050573.1	5	-1	1	20	989	1009	UUGAGCCG-CGUCAAUAUCUC	GACAUAUUGAUGAUGGCUCAA	Cleavage	PREDICTED: Vigna unguiculata anthranilate N-methyltransferase-like (LOC114165936), mRNA	1	Flavonol 3-O-methyltransferase	DEO72_LG8g492	NA	GO:0008171~O-methyltransferase activity;GO:0046983~protein dimerization activity	GO:0032259~methylation	GO:0016021~integral component of membrane
vun-miR171m-3p	XM_028051097.1	3.5	-1	1	20	1926	1945	UUGAGCCGCGUCAAUAUCUC	CAGGUCUUGGCGCGGCUAAA	Cleavage	PREDICTED: Vigna unguiculata TMV resistance protein N-like (LOC114166377), mRNA	1	TIR domain-containing protein	LR48_Vigan09g068100	NA	GO:0043531~ADP binding	GO:0007165~signal transduction	NA
vun-miR171m-3p	XM_028051127.1	5	-1	1	20	10944	10962	UUGAGCCGCGUCAAUAUCUC	GAGAUAU-GGUGCGGCUCAU	Cleavage	PREDICTED: Vigna unguiculata uncharacterized LOC114166401 (LOC114166401), transcript variant X1, mRNA	2	Retrovirus-related Pol polyprotein from transposon TNT 1-94 (Fragment)	KK1_040182	NA	GO:0003676~nucleic acid binding	GO:0015074~DNA integration	NA
vun-miR171m-3p	XM_028051127.1	5	-1	1	20	7647	7665	UUGAGCCGCGUCAAUAUCUC	GAGAUAU-GGCGUGGCUCAC	Cleavage	PREDICTED: Vigna unguiculata uncharacterized LOC114166401 (LOC114166401), transcript variant X1, mRNA	2	Retrovirus-related Pol polyprotein from transposon TNT 1-94 (Fragment)	KK1_040182	NA	GO:0003676~nucleic acid binding	GO:0015074~DNA integration	NA
vun-miR171m-3p	XM_028051128.1	5	-1	1	20	7647	7665	UUGAGCCGCGUCAAUAUCUC	GAGAUAU-GGCGUGGCUCAC	Cleavage	PREDICTED: Vigna unguiculata uncharacterized LOC114166401 (LOC114166401), transcript variant X2, mRNA	1	Retrovirus-related Pol polyprotein from transposon TNT 1-94 (Fragment)	KK1_040182	NA	GO:0003676~nucleic acid binding	GO:0015074~DNA integration	NA
vun-miR171m-3p	XM_028051131.1	5	-1	1	20	2524	2542	UUGAGCCGCGUCAAUAUCUC	GAGAUAU-GGCGUGGCUCAC	Cleavage	PREDICTED: Vigna unguiculata uncharacterized LOC114166403 (LOC114166403), mRNA	1	Disease resistance protein RPS2	DEO72_LG8g687	NA	GO:0043531~ADP binding	NA	NA
vun-miR171m-3p	XM_028051191.1	5	-1	1	20	2648	2666	UUGAGCCGCGUCAAUAUCUC	GAGAUAU-GGCGUGGCUCAC	Cleavage	PREDICTED: Vigna unguiculata uncharacterized LOC114166455 (LOC114166455), mRNA	1	Disease resistance protein RPS2	DEO72_LG8g687	NA	GO:0043531~ADP binding	NA	NA
vun-miR171m-3p	XM_028051509.1	1	-1	1	20	1763	1782	UUGAGCCGCGUCAAUAUCUC	GGGAUAUUGGCGCGGCUCAA	Cleavage	PREDICTED: Vigna unguiculata scarecrow-like protein 6 (LOC114166726), transcript variant X1, mRNA	1	DELLA protein	DEO72_LG8g1063	NA	NA	NA	NA
vun-miR171m-3p	XM_028051510.1	1	-1	1	20	1597	1616	UUGAGCCGCGUCAAUAUCUC	GGGAUAUUGGCGCGGCUCAA	Cleavage	PREDICTED: Vigna unguiculata scarecrow-like protein 6 (LOC114166726), transcript variant X2, mRNA	1	DELLA protein	DEO72_LG8g1063	NA	NA	NA	NA
vun-miR171m-3p	XM_028051511.1	1	-1	1	20	1594	1613	UUGAGCCGCGUCAAUAUCUC	GGGAUAUUGGCGCGGCUCAA	Cleavage	PREDICTED: Vigna unguiculata scarecrow-like protein 6 (LOC114166726), transcript variant X3, mRNA	1	DELLA protein	DEO72_LG8g1063	NA	NA	NA	NA
vun-miR171m-3p	XM_028051559.1	3.5	-1	1	20	3299	3318	UUGAGCCGCGUCAAUAUCUC	CAGGUCUUGGCGCGGCUAAA	Cleavage	PREDICTED: Vigna unguiculata TMV resistance protein N-like (LOC114166763), transcript variant X1, mRNA	1	TIR domain-containing protein	LR48_Vigan09g068100	NA	GO:0043531~ADP binding	GO:0007165~signal transduction	NA
vun-miR171m-3p	XM_028051560.1	3.5	-1	1	20	1901	1920	UUGAGCCGCGUCAAUAUCUC	CAGGUCUUGGCGCGGCUAAA	Cleavage	PREDICTED: Vigna unguiculata TMV resistance protein N-like (LOC114166763), transcript variant X2, mRNA	1	TIR domain-containing protein	LR48_Vigan09g068100	NA	GO:0043531~ADP binding	GO:0007165~signal transduction	NA
vun-miR171m-3p	XM_028051561.1	3.5	-1	1	20	1991	2010	UUGAGCCGCGUCAAUAUCUC	CAGGUCUUGGCGCGGCUAAA	Cleavage	PREDICTED: Vigna unguiculata TMV resistance protein N-like (LOC114166763), transcript variant X3, mRNA	1	TIR domain-containing protein	Vigan.01G271200 VIGAN_01271200	NA	GO:0043531~ADP binding	GO:0007165~signal transduction	NA
vun-miR171m-3p	XM_028051563.1	3.5	-1	1	20	1373	1392	UUGAGCCGCGUCAAUAUCUC	CAGGUCUUGGCGCGGCUAAA	Cleavage	PREDICTED: Vigna unguiculata TMV resistance protein N-like (LOC114166763), transcript variant X4, mRNA	1	TIR domain-containing protein	LR48_Vigan09g068100	NA	GO:0043531~ADP binding	GO:0007165~signal transduction	NA
vun-miR171m-3p	XM_028051564.1	3.5	-1	1	20	1283	1302	UUGAGCCGCGUCAAUAUCUC	CAGGUCUUGGCGCGGCUAAA	Cleavage	PREDICTED: Vigna unguiculata TMV resistance protein N-like (LOC114166763), transcript variant X5, mRNA	1	TIR domain-containing protein	LR48_Vigan09g068100	NA	GO:0043531~ADP binding	GO:0007165~signal transduction	NA
vun-miR171m-3p	XM_028051565.1	3.5	-1	1	20	1178	1197	UUGAGCCGCGUCAAUAUCUC	CAGGUCUUGGCGCGGCUAAA	Cleavage	PREDICTED: Vigna unguiculata TMV resistance protein N-like (LOC114166763), transcript variant X6, mRNA	1	TIR domain-containing protein	LR48_Vigan09g068100	NA	GO:0043531~ADP binding	GO:0007165~signal transduction	NA
vun-miR171m-3p	XM_028051566.1	3.5	-1	1	20	2516	2535	UUGAGCCGCGUCAAUAUCUC	CAGGUCUUGGCGCGGCUAAA	Cleavage	PREDICTED: Vigna unguiculata TMV resistance protein N-like (LOC114166764), transcript variant X1, mRNA	1	TIR domain-containing protein	Vigan.01G271200 VIGAN_01271200	NA	GO:0043531~ADP binding	GO:0007165~signal transduction	NA
vun-miR171m-3p	XM_028051567.1	3.5	-1	1	20	2516	2535	UUGAGCCGCGUCAAUAUCUC	CAGGUCUUGGCGCGGCUAAA	Cleavage	PREDICTED: Vigna unguiculata TMV resistance protein N-like (LOC114166764), transcript variant X2, mRNA	1	TIR domain-containing protein	Vigan.01G271200 VIGAN_01271200	NA	GO:0043531~ADP binding	GO:0007165~signal transduction	NA
vun-miR171m-3p	XM_028051568.1	3.5	-1	1	20	2513	2532	UUGAGCCGCGUCAAUAUCUC	CAGGUCUUGGCGCGGCUAAA	Cleavage	PREDICTED: Vigna unguiculata TMV resistance protein N-like (LOC114166764), transcript variant X3, mRNA	1	TIR domain-containing protein	Vigan.01G271200 VIGAN_01271200	NA	GO:0043531~ADP binding	GO:0007165~signal transduction	NA
vun-miR171m-3p	XM_028051569.1	3.5	-1	1	20	2425	2444	UUGAGCCGCGUCAAUAUCUC	CAGGUCUUGGCGCGGCUAAA	Cleavage	PREDICTED: Vigna unguiculata TMV resistance protein N-like (LOC114166764), transcript variant X4, mRNA	1	TIR domain-containing protein	Vigan.01G271200 VIGAN_01271200	NA	GO:0043531~ADP binding	GO:0007165~signal transduction	NA
vun-miR171m-3p	XM_028051570.1	3.5	-1	1	20	2517	2536	UUGAGCCGCGUCAAUAUCUC	CAGGUCUUGGCGCGGCUAAA	Cleavage	PREDICTED: Vigna unguiculata TMV resistance protein N-like (LOC114166764), transcript variant X5, mRNA	1	TIR domain-containing protein	Vigan.01G271200 VIGAN_01271200	NA	GO:0043531~ADP binding	GO:0007165~signal transduction	NA
vun-miR171m-3p	XM_028051571.1	3.5	-1	1	20	1373	1392	UUGAGCCGCGUCAAUAUCUC	CAGGUCUUGGCGCGGCUAAA	Cleavage	PREDICTED: Vigna unguiculata TMV resistance protein N-like (LOC114166764), transcript variant X6, mRNA	1	TIR domain-containing protein	LR48_Vigan09g068100	NA	GO:0043531~ADP binding	GO:0007165~signal transduction	NA
vun-miR171m-3p	XM_028051572.1	3.5	-1	1	20	1283	1302	UUGAGCCGCGUCAAUAUCUC	CAGGUCUUGGCGCGGCUAAA	Cleavage	PREDICTED: Vigna unguiculata TMV resistance protein N-like (LOC114166764), transcript variant X7, mRNA	1	TIR domain-containing protein	LR48_Vigan09g068100	NA	GO:0043531~ADP binding	GO:0007165~signal transduction	NA
vun-miR171m-3p	XM_028051574.1	3.5	-1	1	20	1178	1197	UUGAGCCGCGUCAAUAUCUC	CAGGUCUUGGCGCGGCUAAA	Cleavage	PREDICTED: Vigna unguiculata TMV resistance protein N-like (LOC114166764), transcript variant X8, mRNA	1	TIR domain-containing protein	LR48_Vigan09g068100	NA	GO:0043531~ADP binding	GO:0007165~signal transduction	NA
vun-miR171m-3p	XM_028051732.1	1	-1	1	20	1701	1720	UUGAGCCGCGUCAAUAUCUC	GGGAUAUUGGCGCGGCUCAA	Cleavage	PREDICTED: Vigna unguiculata scarecrow-like protein 6 (LOC114166860), transcript variant X2, mRNA	1	DELLA protein	DEO72_LG8g1061	NA	NA	NA	NA
vun-miR171m-3p	XM_028052158.1	4.5	-1	1	20	1958	1977	UUGAGCCGCGUCAAUAUCUC	CAGGUGUUGCCGUGGCUAAA	Translation	PREDICTED: Vigna unguiculata TMV resistance protein N-like (LOC114167169), mRNA	1	TMV resistance protein N	LOC106773657	NA	GO:0043531~ADP binding	GO:0007165~signal transduction	NA
vun-miR171m-3p	XM_028052598.1	4.5	-1	1	20	2773	2792	UUGAGCCGCGUCAAUAUCUC	CGGGUAUUGACUCGGGUCGA	Cleavage	PREDICTED: Vigna unguiculata homeobox-leucine zipper protein ANTHOCYANINLESS 2-like (LOC114167499), transcript variant X2, mRNA	1	Homeobox-leucine zipper protein	DEO72_LG8g822	Transcription factors [03000]	GO:0008289~lipid binding;GO:0043565~sequence-specific DNA binding	GO:0006355~regulation of transcription, DNA-templated	GO:0005634~nucleus
vun-miR171m-3p	XM_028053306.1	2.5	-1	1	20	1570	1589	UUGAGCCGCGUCAAUAUCUC	GCGAUAUUGACGAGGCUCAA	Cleavage	PREDICTED: Vigna unguiculata pentatricopeptide repeat-containing protein At4g37170-like (LOC114168470), mRNA	1	Cell division protease FtsH	DEO72_LG3g787	NA	GO:0008233~peptidase activity	GO:0051301~cell division	NA
vun-miR171m-3p	XM_028053309.1	2.5	-1	1	20	1186	1205	UUGAGCCGCGUCAAUAUCUC	GCGAUAUUGACGAGGCUCAA	Cleavage	PREDICTED: Vigna unguiculata pentatricopeptide repeat-containing protein At2g13600-like (LOC114168473), transcript variant X1, mRNA	1	Cell division protease FtsH	DEO72_LG3g787	NA	GO:0008233~peptidase activity	GO:0051301~cell division	NA
vun-miR171m-3p	XM_028053310.1	2.5	-1	1	20	1075	1094	UUGAGCCGCGUCAAUAUCUC	GCGAUAUUGACGAGGCUCAA	Cleavage	PREDICTED: Vigna unguiculata pentatricopeptide repeat-containing protein At2g13600-like (LOC114168473), transcript variant X2, mRNA	1	Cell division protease FtsH	DEO72_LG3g787	NA	GO:0008233~peptidase activity	GO:0051301~cell division	NA
vun-miR171m-3p	XM_028053438.1	4	-1	1	20	1998	2017	UUGAGCCGCGUCAAUAUCUC	CAGAUUUUGGCUUGGCUCGA	Cleavage	PREDICTED: Vigna unguiculata G-type lectin S-receptor-like serine/threonine-protein kinase At4g27290 (LOC114168563), mRNA	1	Receptor-like serine/threonine-protein kinase (EC 2.7.11.1)	DEO72_LG3g1813	NA	GO:0004674~protein serine/threonine kinase activity;GO:0005524~ATP binding	GO:0048544~recognition of pollen	GO:0016021~integral component of membrane
vun-miR171m-3p	XM_028053715.1	3.5	-1	1	20	1386	1405	UUGAGCCGCGUCAAUAUCUC	CAGCUGUUGAUGCGGUUCAC	Cleavage	PREDICTED: Vigna unguiculata dynamin-related protein 5A-like (LOC114168774), transcript variant X1, mRNA	1	Uncharacterized protein	Ahy_B05g078854	NA	GO:0003924~GTPase activity;GO:0005525~GTP binding	GO:0006629~lipid metabolic process	NA
vun-miR171m-3p	XM_028054450.1	4	-1	1	20	451	470	UUGAGCCGCGUCAAUAUCUC	AAGAUAAUGGCGCGUCUCGG	Cleavage	PREDICTED: Vigna unguiculata adenylyl-sulfate kinase 3-like (LOC114169333), transcript variant X1, mRNA	1	Adenylyl-sulfate kinase (EC 2.7.1.25)	LOC106777070	PATHWAY: Sulfur metabolism; hydrogen sulfide biosynthesis; sulfite from sulfate: step 2/3. {ECO:0000256|RuleBase:RU004347}.; Sulfur metabolism [00920]; Purine metabolism [00230]	GO:0004020~adenylylsulfate kinase activity;GO:0005524~ATP binding	GO:0000103~sulfate assimilation;GO:0070814~hydrogen sulfide biosynthetic process	GO:0016021~integral component of membrane
vun-miR171m-3p	XM_028054458.1	4	-1	1	20	194	213	UUGAGCCGCGUCAAUAUCUC	AAGAUAAUGGCGCGUCUCGG	Cleavage	PREDICTED: Vigna unguiculata adenylyl-sulfate kinase 3-like (LOC114169333), transcript variant X2, mRNA	1	Adenylyl-sulfate kinase (EC 2.7.1.25)	LOC106777070	PATHWAY: Sulfur metabolism; hydrogen sulfide biosynthesis; sulfite from sulfate: step 2/3. {ECO:0000256|RuleBase:RU004347}.; Sulfur metabolism [00920]; Purine metabolism [00230]	GO:0004020~adenylylsulfate kinase activity;GO:0005524~ATP binding	GO:0000103~sulfate assimilation;GO:0070814~hydrogen sulfide biosynthetic process	GO:0016021~integral component of membrane
vun-miR171m-3p	XM_028056973.1	4.5	-1	1	20	1174	1193	UUGAGCCGCGUCAAUAUCUC	GAGGUAUUGGUGUUGUUCGA	Cleavage	PREDICTED: Vigna unguiculata uncharacterized LOC114172638 (LOC114172638), mRNA	1	Uncharacterized protein	TSUD_411620	NA	GO:0003676~nucleic acid binding;GO:0004190~aspartic-type endopeptidase activity;GO:0008270~zinc ion binding	GO:0015074~DNA integration	NA
vun-miR171m-3p	XM_028056994.1	5	-1	1	20	76	96	UUGAGCCGCGUCAAUA-UCUC	GAGAAUGUUGAUGCGGUUGAA	Cleavage	PREDICTED: Vigna unguiculata zinc finger BED domain-containing protein RICESLEEPER 2-like (LOC114172664), mRNA	1	BED-type domain-containing protein	TSUD_300020	NA	GO:0003677~DNA binding;GO:0046983~protein dimerization activity	NA	NA
vun-miR171m-3p	XM_028057076.1	4	-1	1	20	1218	1237	UUGAGCCGCGUCAAUAUCUC	AGGAUAUUGACGUUGUUCGG	Cleavage	PREDICTED: Vigna unguiculata probable LRR receptor-like serine/threonine-protein kinase At1g12460 (LOC114172822), mRNA	1	Serine/threonine kinase	DEO72_LG4g2573	NA	GO:0004672~protein kinase activity;GO:0005524~ATP binding	NA	GO:0016021~integral component of membrane
vun-miR171m-3p	XM_028057107.1	3.5	-1	1	20	2493	2512	UUGAGCCGCGUCAAUAUCUC	CAGGUCUUGGCGCGGCUAAA	Cleavage	PREDICTED: Vigna unguiculata TMV resistance protein N-like (LOC114172942), transcript variant X1, mRNA	1	Retrovirus-related Pol polyprotein from transposon TNT 1-94 (Fragment)	KK1_040182	RNA polymerase [03020]; DNA repair and recombination proteins [03400]; Transcription machinery [03021]	GO:0003676~nucleic acid binding	GO:0015074~DNA integration	NA
vun-miR171m-3p	XM_028057108.1	3.5	-1	1	20	2493	2512	UUGAGCCGCGUCAAUAUCUC	CAGGUCUUGGCGCGGCUAAA	Cleavage	PREDICTED: Vigna unguiculata TMV resistance protein N-like (LOC114172942), transcript variant X2, mRNA	1	Retrovirus-related Pol polyprotein from transposon TNT 1-94 (Fragment)	KK1_040182	RNA polymerase [03020]; DNA repair and recombination proteins [03400]; Transcription machinery [03021]	GO:0003676~nucleic acid binding	GO:0015074~DNA integration	NA
vun-miR171m-3p	XM_028057109.1	3.5	-1	1	20	2490	2509	UUGAGCCGCGUCAAUAUCUC	CAGGUCUUGGCGCGGCUAAA	Cleavage	PREDICTED: Vigna unguiculata TMV resistance protein N-like (LOC114172942), transcript variant X3, mRNA	1	Retrovirus-related Pol polyprotein from transposon TNT 1-94 (Fragment)	KK1_040182	RNA polymerase [03020]; DNA repair and recombination proteins [03400]; Transcription machinery [03021]	GO:0003676~nucleic acid binding	GO:0015074~DNA integration	NA
vun-miR171m-3p	XM_028057110.1	3.5	-1	1	20	2402	2421	UUGAGCCGCGUCAAUAUCUC	CAGGUCUUGGCGCGGCUAAA	Cleavage	PREDICTED: Vigna unguiculata TMV resistance protein N-like (LOC114172942), transcript variant X4, mRNA	1	Retrovirus-related Pol polyprotein from transposon TNT 1-94 (Fragment)	KK1_040182	RNA polymerase [03020]; DNA repair and recombination proteins [03400]; Transcription machinery [03021]	GO:0003676~nucleic acid binding	GO:0015074~DNA integration	NA
vun-miR171m-3p	XM_028057111.1	3.5	-1	1	20	2495	2514	UUGAGCCGCGUCAAUAUCUC	CAGGUCUUGGCGCGGCUAAA	Cleavage	PREDICTED: Vigna unguiculata TMV resistance protein N-like (LOC114172942), transcript variant X5, mRNA	1	Retrovirus-related Pol polyprotein from transposon TNT 1-94 (Fragment)	KK1_040182	RNA polymerase [03020]; DNA repair and recombination proteins [03400]; Transcription machinery [03021]	GO:0003676~nucleic acid binding	GO:0015074~DNA integration	NA
vun-miR171m-3p	XM_028057112.1	3.5	-1	1	20	1373	1392	UUGAGCCGCGUCAAUAUCUC	CAGGUCUUGGCGCGGCUAAA	Cleavage	PREDICTED: Vigna unguiculata TMV resistance protein N-like (LOC114172942), transcript variant X6, mRNA	1	TIR domain-containing protein	LR48_Vigan09g068100	NA	GO:0043531~ADP binding	GO:0007165~signal transduction	NA
vun-miR171m-3p	XM_028057113.1	3.5	-1	1	20	1283	1302	UUGAGCCGCGUCAAUAUCUC	CAGGUCUUGGCGCGGCUAAA	Cleavage	PREDICTED: Vigna unguiculata TMV resistance protein N-like (LOC114172942), transcript variant X7, mRNA	1	TIR domain-containing protein	LR48_Vigan09g068100	NA	GO:0043531~ADP binding	GO:0007165~signal transduction	NA
vun-miR171m-3p	XM_028057114.1	3.5	-1	1	20	1178	1197	UUGAGCCGCGUCAAUAUCUC	CAGGUCUUGGCGCGGCUAAA	Cleavage	PREDICTED: Vigna unguiculata TMV resistance protein N-like (LOC114172942), transcript variant X8, mRNA	1	TIR domain-containing protein	Vigan.01G271200 VIGAN_01271200	NA	GO:0043531~ADP binding	GO:0007165~signal transduction	NA
vun-miR171m-3p	XM_028057210.1	4	-1	1	20	1037	1056	UUGAGCCGCGUCAAUAUCUC	UAGAUAUUGAUGUUGUUUAG	Cleavage	PREDICTED: Vigna unguiculata preprotein translocase subunit SECE1 (LOC114173020), mRNA	1	Uncharacterized protein	DEO72_LG4g2811	NA	NA	NA	GO:0016021~integral component of membrane
vun-miR171m-3p	XM_028057549.1	3.5	-1	1	20	406	425	UUGAGCCGCGUCAAUAUCUC	AAGAGAUUGAGGUGGCUCAG	Translation	PREDICTED: Vigna unguiculata BSD domain-containing protein C22A12.14c-like (LOC114173270), mRNA	1	BSD domain-containing protein	DEO72_LG6g2295	NA	NA	NA	NA
vun-miR171m-3p	XM_028057582.1	4.5	-1	1	20	67	86	UUGAGCCGCGUCAAUAUCUC	AAGAUAUGGGUGUGGCUGAA	Cleavage	PREDICTED: Vigna unguiculata MLP-like protein 328 (LOC114173294), mRNA	1	Bet_v_1 domain-containing protein	DEO72_LG4g908	NA	NA	GO:0006952~defense response	NA
vun-miR171m-3p	XM_028058065.1	4.5	-1	1	20	525	544	UUGAGCCGCGUCAAUAUCUC	GAGAUGUGGACCCGGCUCAC	Cleavage	PREDICTED: Vigna unguiculata hsp70-Hsp90 organizing protein 3-like (LOC114173579), mRNA	1	Stress-induced-phosphoprotein 1	DEO72_LG4g2549	Chaperones and folding catalysts [03110]	NA	NA	NA
vun-miR171m-3p	XM_028058126.1	3.5	-1	1	20	1429	1448	UUGAGCCGCGUCAAUAUCUC	AGGAUGUUGAAGUGGUUCAA	Translation	PREDICTED: Vigna unguiculata protein decapping 5 (LOC114173634), transcript variant X1, mRNA	1	TFG box	DEO72_LG4g665	Messenger RNA biogenesis [03019]	NA	NA	NA
vun-miR171m-3p	XM_028058127.1	3.5	-1	1	20	1428	1447	UUGAGCCGCGUCAAUAUCUC	AGGAUGUUGAAGUGGUUCAA	Translation	PREDICTED: Vigna unguiculata protein decapping 5 (LOC114173634), transcript variant X2, mRNA	1	TFG box	DEO72_LG4g665	Messenger RNA biogenesis [03019]	NA	NA	NA
vun-miR171m-3p	XM_028058168.1	4	-1	1	20	1333	1352	UUGAGCCGCGUCAAUAUCUC	AGGAUGUUGAAGUGGUUCAG	Translation	PREDICTED: Vigna unguiculata protein decapping 5-like (LOC114173661), mRNA	1	TFG box	DEO72_LG4g661	Messenger RNA biogenesis [03019]	NA	NA	NA
vun-miR171m-3p	XM_028059050.1	3	-1	1	20	753	772	UUGAGCCGCGUCAAUAUCUC	GUGAUAUUGGAGCGGCUCAA	Translation	PREDICTED: Vigna unguiculata scarecrow-like protein 15 (LOC114174251), mRNA	1	GRAS domain-containing protein	LR48_Vigan06g042400	NA	NA	NA	NA
vun-miR171m-3p	XM_028059080.1	4.5	-1	1	20	722	741	UUGAGCCGCGUCAAUAUCUC	GAGAUACUGACGUGAAUCAA	Cleavage	PREDICTED: Vigna unguiculata plectin (LOC114174268), mRNA	1	Uncharacterized protein	DEO72_LG4g86	NA	NA	NA	GO:0016021~integral component of membrane
vun-miR171m-3p	XM_028059826.1	4	-1	1	20	1577	1596	UUGAGCCGCGUCAAUAUCUC	UAGAUGUUGUUGAGGCUCAA	Translation	PREDICTED: Vigna unguiculata uncharacterized LOC114175067 (LOC114175067), mRNA	1	Retrovirus-related Pol polyprotein from transposon 17.6	KK1_020292	NA	GO:0003676~nucleic acid binding;GO:0004523~RNA-DNA hybrid ribonuclease activity;GO:0016491~oxidoreductase activity	GO:0015074~DNA integration	NA
vun-miR171m-3p	XM_028060582.1	5	-1	1	20	1067	1086	UUGAGCCGCGUCAAUAUCUC	GAGGGGUUGACGUGGCUCUG	Cleavage	PREDICTED: Vigna unguiculata protein CHROMATIN REMODELING 24 (LOC114175784), transcript variant X1, mRNA	1	DNA excision repair protein ERCC-6	DEO72_LG2g5216	Chromosome and associated proteins [03036]	GO:0005524~ATP binding	NA	NA
vun-miR171m-3p	XM_028060583.1	5	-1	1	20	1058	1077	UUGAGCCGCGUCAAUAUCUC	GAGGGGUUGACGUGGCUCUG	Cleavage	PREDICTED: Vigna unguiculata protein CHROMATIN REMODELING 24 (LOC114175784), transcript variant X2, mRNA	1	DNA excision repair protein ERCC-6	DEO72_LG2g5216	Chromosome and associated proteins [03036]	GO:0005524~ATP binding	NA	NA
vun-miR171m-3p	XM_028060584.1	5	-1	1	20	993	1012	UUGAGCCGCGUCAAUAUCUC	GAGGGGUUGACGUGGCUCUG	Cleavage	PREDICTED: Vigna unguiculata protein CHROMATIN REMODELING 24 (LOC114175784), transcript variant X3, mRNA	1	DNA excision repair protein ERCC-6	DEO72_LG2g5216	Chromosome and associated proteins [03036]	GO:0005524~ATP binding	NA	NA
vun-miR171m-3p	XM_028060613.1	4	-1	1	20	391	410	UUGAGCCGCGUCAAUAUCUC	AAUGUAUUGAUGUGGCUAAA	Cleavage	PREDICTED: Vigna unguiculata immune-associated nucleotide-binding protein 9-like (LOC114175805), mRNA	1	P-loop containing nucleoside triphosphate hydrolase	DEO72_LG6g97	NA	GO:0005525~GTP binding;GO:0016787~hydrolase activity	NA	NA
vun-miR171m-3p	XM_028061531.1	3.5	-1	1	20	1065	1084	UUGAGCCGCGUCAAUAUCUC	AAGACAUUGAUGCAGCUCAG	Cleavage	PREDICTED: Vigna unguiculata beta-glucosidase 40-like (LOC114176483), mRNA	1	Beta-glucosidase	DEO72_LG2g2946	Starch and sucrose metabolism [00500]; Cyanoamino acid metabolism [00460]; Phenylpropanoid biosynthesis [00940]	GO:0004553~hydrolase activity, hydrolyzing O-glycosyl compounds	GO:0005975~carbohydrate metabolic process	NA
vun-miR171m-3p	XM_028061779.1	4	-1	1	20	840	859	UUGAGCCGCGUCAAUAUCUC	CCCAUGUUGGCGCGGUUCGA	Cleavage	PREDICTED: Vigna unguiculata geraniol 8-hydroxylase-like (LOC114176670), mRNA	1	Flavonoid 3'-monooxygenase	DEO72_LG2g1538	Cytochrome P450 [00199]	GO:0004497~monooxygenase activity;GO:0005506~iron ion binding;GO:0016705~oxidoreductase activity, acting on paired donors, with incorporation or reduction of molecular oxygen;GO:0020037~heme binding	NA	GO:0016021~integral component of membrane
vun-miR171m-3p	XM_028062802.1	4	-1	1	20	1229	1248	UUGAGCCGCGUCAAUAUCUC	UAGACAUAGAUGUGGUUCAA	Cleavage	PREDICTED: Vigna unguiculata BTB/POZ domain-containing protein DOT3 (LOC114177458), transcript variant X1, mRNA	1	Uncharacterized protein	DEO72_LG2g5050	NA	NA	NA	NA
vun-miR171m-3p	XM_028062803.1	4	-1	1	20	1226	1245	UUGAGCCGCGUCAAUAUCUC	UAGACAUAGAUGUGGUUCAA	Cleavage	PREDICTED: Vigna unguiculata BTB/POZ domain-containing protein DOT3 (LOC114177458), transcript variant X2, mRNA	1	Uncharacterized protein	DEO72_LG2g5050	NA	NA	NA	NA
vun-miR171m-3p	XM_028062829.1	5	-1	1	20	988	1007	UUGAGCCGCGUCAAUAUCUC	AGGAUGUUGAUGUGGCUUUC	Cleavage	PREDICTED: Vigna unguiculata CBL-interacting serine/threonine-protein kinase 21 (LOC114177464), mRNA	1	Non-specific serine/threonine protein kinase (EC 2.7.11.1)	DEO72_LG2g737	NA	GO:0004674~protein serine/threonine kinase activity;GO:0005524~ATP binding	GO:0007165~signal transduction	NA
vun-miR171m-3p	XM_028063296.1	4.5	-1	1	20	501	520	UUGAGCCGCGUCAAUAUCUC	CUGAUAUUGACGUGCUUCAU	Cleavage	PREDICTED: Vigna unguiculata uncharacterized LOC114177777 (LOC114177777), mRNA	1	Uncharacterized protein	DEO72_LG2g4791	NA	NA	NA	GO:0016021~integral component of membrane
vun-miR171m-3p	XM_028063635.1	4	-1	1	20	292	311	UUGAGCCGCGUCAAUAUCUC	CAGAAGUUGACCUGGCUUAA	Cleavage	PREDICTED: Vigna unguiculata synaptotagmin-5 (LOC114177991), transcript variant X1, mRNA	1	DNA-directed RNA polymerase II subunit RPB11	DEO72_LG2g929	NA	GO:0003899~DNA-directed RNA polymerase activity;GO:0008289~lipid binding	GO:0006869~lipid transport	GO:0016021~integral component of membrane
vun-miR171m-3p	XM_028063658.1	4	-1	1	20	3396	3415	UUGAGCCGCGUCAAUAUCUC	CAGCUGUUGGUGUGGUUUAA	Cleavage	PREDICTED: Vigna unguiculata uncharacterized protein DDB_G0287625 (LOC114177999), transcript variant X4, mRNA	1	Filamin repeat-like	DEO72_LG2g3683	NA	GO:0003723~RNA binding;GO:0046872~metal ion binding	NA	NA
vun-miR171m-3p	XM_028063733.1	4	-1	1	20	2002	2021	UUGAGCCGCGUCAAUAUCUC	AAGAUCUUGGUGUGGUUCAC	Cleavage	PREDICTED: Vigna unguiculata protein NUCLEAR FUSION DEFECTIVE 4-like (LOC114178053), mRNA	1	Nodulin-like domain-containing protein	DEO72_LG2g2144	NA	NA	NA	GO:0016021~integral component of membrane
vun-miR171m-3p	XM_028063871.1	5	-1	1	20	988	1007	UUGAGCCGCGUCAAUAUCUC	GAGGUGUUGACCCUGCUCAC	Cleavage	PREDICTED: Vigna unguiculata aspartic proteinase-like (LOC114178140), mRNA	1	Aspartic proteinase (Phytepsin)	DEO72_LG2g72	Peptidases and inhibitors [01002]	GO:0004190~aspartic-type endopeptidase activity	GO:0006629~lipid metabolic process	NA
vun-miR171m-3p	XM_028064712.1	4	-1	1	20	7186	7205	UUGAGCCGCGUCAAUAUCUC	GGAAUCUUGACGUGGCUCAU	Cleavage	PREDICTED: Vigna unguiculata E3 ubiquitin-protein ligase UPL1-like (LOC114178672), transcript variant X1, mRNA	2	E3 ubiquitin-protein ligase HUWE1	DEO72_LG2g4137	Ubiquitin system [04121]; Ubiquitin mediated proteolysis [04120]	GO:0004842~ubiquitin-protein transferase activity	NA	NA
vun-miR171m-3p	XM_028064712.1	4.5	-1	1	20	9781	9800	UUGAGCCGCGUCAAUAUCUC	UGGAUAAUGGUGUGGAUCAA	Cleavage	PREDICTED: Vigna unguiculata E3 ubiquitin-protein ligase UPL1-like (LOC114178672), transcript variant X1, mRNA	2	E3 ubiquitin-protein ligase HUWE1	DEO72_LG2g4137	Ubiquitin system [04121]; Ubiquitin mediated proteolysis [04120]	GO:0004842~ubiquitin-protein transferase activity	NA	NA
vun-miR171m-3p	XM_028064713.1	4	-1	1	20	7183	7202	UUGAGCCGCGUCAAUAUCUC	GGAAUCUUGACGUGGCUCAU	Cleavage	PREDICTED: Vigna unguiculata E3 ubiquitin-protein ligase UPL1-like (LOC114178672), transcript variant X2, mRNA	2	E3 ubiquitin-protein ligase HUWE1	DEO72_LG2g4137	Ubiquitin system [04121]; Ubiquitin mediated proteolysis [04120]	GO:0004842~ubiquitin-protein transferase activity	NA	NA
vun-miR171m-3p	XM_028064713.1	4.5	-1	1	20	9778	9797	UUGAGCCGCGUCAAUAUCUC	UGGAUAAUGGUGUGGAUCAA	Cleavage	PREDICTED: Vigna unguiculata E3 ubiquitin-protein ligase UPL1-like (LOC114178672), transcript variant X2, mRNA	2	E3 ubiquitin-protein ligase HUWE1	DEO72_LG2g4137	Ubiquitin system [04121]; Ubiquitin mediated proteolysis [04120]	GO:0004842~ubiquitin-protein transferase activity	NA	NA
vun-miR171m-3p	XM_028064757.1	5	-1	1	20	1886	1905	UUGAGCCGCGUCAAUAUCUC	GAGGAAUUGAUGUGGGUCAC	Cleavage	PREDICTED: Vigna unguiculata dynamin-related protein 4C-like (LOC114178703), mRNA	1	Dynamin superfamily	DEO72_LG2g4871	NA	GO:0003924~GTPase activity;GO:0005525~GTP binding	NA	NA
vun-miR171m-3p	XM_028064977.1	5	-1	1	20	1515	1534	UUGAGCCGCGUCAAUAUCUC	GGGAUUUUGAUGCAGUUCAU	Cleavage	PREDICTED: Vigna unguiculata uncharacterized LOC114178855 (LOC114178855), mRNA	1	Pheophorbide a oxygenase	DEO72_LG2g4800	NA	GO:0010277~chlorophyllide a oxygenase [overall] activity;GO:0016757~transferase activity, transferring glycosyl groups;GO:0051537~2 iron, 2 sulfur cluster binding	GO:0006004~fucose metabolic process	NA
vun-miR171m-3p	XM_028065240.1	5	-1	1	20	1027	1046	UUGAGCCGCGUCAAUAUCUC	GAGAUGUUGGAGCGGUUAGA	Translation	PREDICTED: Vigna unguiculata arogenate dehydrogenase 1, chloroplastic (LOC114179044), mRNA	1	Arogenate dehydrogenase	DEO72_LG2g1060	Phenylalanine, tyrosine and tryptophan biosynthesis [00400]	GO:0004665~prephenate dehydrogenase (NADP+) activity;GO:0008977~prephenate dehydrogenase activity	GO:0006571~tyrosine biosynthetic process	NA
vun-miR171m-3p	XM_028067172.1	4.5	-1	1	20	691	710	UUGAGCCGCGUCAAUAUCUC	AGGAUGUUGAUGUGGAUCAU	Cleavage	PREDICTED: Vigna unguiculata YTH domain-containing protein ECT2-like (LOC114180877), transcript variant X1, mRNA	1	YTH domain-containing protein	DEO72_LG6g834	Messenger RNA biogenesis [03019]	GO:0003723~RNA binding	NA	NA
vun-miR171m-3p	XM_028067179.1	4.5	-1	1	20	685	704	UUGAGCCGCGUCAAUAUCUC	AGGAUGUUGAUGUGGAUCAU	Cleavage	PREDICTED: Vigna unguiculata YTH domain-containing protein ECT2-like (LOC114180877), transcript variant X2, mRNA	1	YTH domain-containing protein	DEO72_LG6g834	Messenger RNA biogenesis [03019]	GO:0003723~RNA binding	NA	NA
vun-miR171m-3p	XM_028067184.1	4.5	-1	1	20	154	173	UUGAGCCGCGUCAAUAUCUC	AGGAUGUUGAUGUGGAUCAU	Cleavage	PREDICTED: Vigna unguiculata YTH domain-containing protein ECT2-like (LOC114180877), transcript variant X3, mRNA	1	YTH domain-containing protein	DEO72_LG6g834	Messenger RNA biogenesis [03019]	GO:0003723~RNA binding	NA	NA
vun-miR171m-3p	XM_028068261.1	4	-1	1	20	2610	2629	UUGAGCCGCGUCAAUAUCUC	UAGCUGUUGGAGUGGCUCAA	Translation	PREDICTED: Vigna unguiculata probable leucine-rich repeat receptor-like protein kinase At2g33170 (LOC114181726), mRNA	1	Serine/threonine kinase	DEO72_LG5g2380	NA	GO:0004672~protein kinase activity;GO:0005524~ATP binding	NA	GO:0016021~integral component of membrane
vun-miR171m-3p	XM_028068308.1	4	-1	1	20	2228	2247	UUGAGCCGCGUCAAUAUCUC	UGGCUAUUGAUGCUGCUCGA	Cleavage	PREDICTED: Vigna unguiculata probable serine/threonine-protein kinase SIS8 (LOC114181763), transcript variant X3, mRNA	1	probable serine/threonine-protein kinase SIS8 isoform X1	LOC106769971	NA	GO:0004672~protein kinase activity;GO:0005524~ATP binding	NA	NA
vun-miR171m-3p	XM_028068818.1	4.5	-1	1	20	718	737	UUGAGCCGCGUCAAUAUCUC	UAGAUGUUGGUGCUGGUCAA	Cleavage	PREDICTED: Vigna unguiculata probable protein S-acyltransferase 7 (LOC114182070), mRNA	1	S-acyltransferase (EC 2.3.1.225) (Palmitoyltransferase)	DEO72_LG5g2078	NA	GO:0019706~protein-cysteine S-palmitoyltransferase activity	NA	GO:0016021~integral component of membrane
vun-miR171m-3p	XM_028068892.1	4	-1	1	20	781	800	UUGAGCCGCGUCAAUAUCUC	GAGGAAUUGGUGAGGCUCAA	Cleavage	PREDICTED: Vigna unguiculata CRM-domain containing factor CFM3, chloroplastic/mitochondrial-like (LOC114182117), transcript variant X1, mRNA	1	RNA-binding	DEO72_LG2g1301	NA	GO:0003723~RNA binding	NA	NA
vun-miR171m-3p	XM_028068893.1	4	-1	1	20	781	800	UUGAGCCGCGUCAAUAUCUC	GAGGAAUUGGUGAGGCUCAA	Cleavage	PREDICTED: Vigna unguiculata CRM-domain containing factor CFM3, chloroplastic/mitochondrial-like (LOC114182117), transcript variant X2, mRNA	1	RNA-binding	DEO72_LG2g1301	NA	GO:0003723~RNA binding	NA	NA
vun-miR171m-3p	XM_028069301.1	4	-1	1	20	606	625	UUGAGCCGCGUCAAUAUCUC	UUGAUUUUGGUGUGGCUCAG	Cleavage	PREDICTED: Vigna unguiculata UDP-glycosyltransferase 74G1-like (LOC114182435), mRNA	1	Glycosyltransferase (EC 2.4.1.-)	DEO72_LG5g701	Glycosyltransferases [01003]	GO:0016758~transferase activity, transferring hexosyl groups	NA	NA
vun-miR171m-3p	XM_028069525.1	4.5	-1	1	20	1096	1115	UUGAGCCGCGUCAAUAUCUC	GAGAUUUUGACAAGGUUCAA	Cleavage	PREDICTED: Vigna unguiculata uncharacterized LOC114182623 (LOC114182623), mRNA	1	Uncharacterized protein	DEO72_LG5g2389	NA	NA	NA	NA
vun-miR171m-3p	XM_028070622.1	3.5	-1	1	20	1169	1188	UUGAGCCGCGUCAAUAUCUC	AGGAUGUUGAUGUGGCACAA	Cleavage	PREDICTED: Vigna unguiculata protein FAF-like, chloroplastic (LOC114183553), mRNA	1	The fantastic four family	DEO72_LG10g733	NA	NA	NA	NA
vun-miR171m-3p	XM_028071689.1	3.5	-1	1	20	2518	2537	UUGAGCCGCGUCAAUAUCUC	GAGACAUUGGUGGGGCUCAA	Cleavage	PREDICTED: Vigna unguiculata uncharacterized LOC114184376 (LOC114184376), mRNA	1	Uncharacterized protein	DEO72_LG10g349	NA	NA	NA	GO:0016021~integral component of membrane
vun-miR171m-3p	XM_028072324.1	1	-1	1	20	1606	1625	UUGAGCCGCGUCAAUAUCUC	GGGAUAUUGGCGCGGCUCAA	Cleavage	PREDICTED: Vigna unguiculata scarecrow-like protein 27 (LOC114184923), transcript variant X1, mRNA	1	DELLA protein	DEO72_LG10g1632	NA	NA	NA	NA
vun-miR171m-3p	XM_028072325.1	1	-1	1	20	1611	1630	UUGAGCCGCGUCAAUAUCUC	GGGAUAUUGGCGCGGCUCAA	Cleavage	PREDICTED: Vigna unguiculata scarecrow-like protein 27 (LOC114184923), transcript variant X2, mRNA	1	DELLA protein	DEO72_LG10g1632	NA	NA	NA	NA
vun-miR171m-3p	XM_028072326.1	1	-1	1	20	1645	1664	UUGAGCCGCGUCAAUAUCUC	GGGAUAUUGGCGCGGCUCAA	Cleavage	PREDICTED: Vigna unguiculata scarecrow-like protein 27 (LOC114184923), transcript variant X3, mRNA	1	DELLA protein	DEO72_LG10g1632	NA	NA	NA	NA
vun-miR171m-3p	XM_028072383.1	3.5	-1	1	20	1825	1844	UUGAGCCGCGUCAAUAUCUC	CAGAUAUUGAUGCAGUUCAU	Cleavage	PREDICTED: Vigna unguiculata ETHYLENE INSENSITIVE 3-like 3 protein (LOC114184958), transcript variant X1, mRNA	1	ETHYLENE INSENSITIVE 3-like 3 protein isoform X1	LOC106759455	MAPK signaling pathway - plant [04016]; Plant hormone signal transduction [04075]; Transcription factors [03000]	GO:0003700~sequence-specific DNA binding transcription factor activity	NA	GO:0005634~nucleus
vun-miR171m-3p	XM_028072384.1	3.5	-1	1	20	1825	1844	UUGAGCCGCGUCAAUAUCUC	CAGAUAUUGAUGCAGUUCAU	Cleavage	PREDICTED: Vigna unguiculata ETHYLENE INSENSITIVE 3-like 3 protein (LOC114184958), transcript variant X2, mRNA	1	ETHYLENE INSENSITIVE 3-like 3 protein isoform X1	LOC106759455	MAPK signaling pathway - plant [04016]; Plant hormone signal transduction [04075]; Transcription factors [03000]	GO:0003700~sequence-specific DNA binding transcription factor activity	NA	GO:0005634~nucleus
vun-miR171m-3p	XM_028073166.1	4.5	-1	1	20	1488	1507	UUGAGCCGCGUCAAUAUCUC	CAGAUAUUGAUGCUGAUCAU	Cleavage	PREDICTED: Vigna unguiculata uncharacterized LOC114185444 (LOC114185444), mRNA	1	Uncharacterized protein	DEO72_LG10g3068	NA	NA	NA	NA
vun-miR171m-3p	XM_028073243.1	4	-1	1	20	149	168	UUGAGCCGCGUCAAUAUCUC	CAGAAAUGGGUGUGGCUCAA	Cleavage	PREDICTED: Vigna unguiculata V-type proton ATPase subunit B 1 (LOC114185495), mRNA	1	ATP-synt_ab domain-containing protein	GW17_00024573	Oxidative phosphorylation [00190]; Exosome [04147]; Phagosome [04145]	GO:0005524~ATP binding	NA	NA
vun-miR171m-3p	XM_028073527.1	5	-1	1	20	747	766	UUGAGCCGCGUCAAUAUCUC	GUGAUGUUGUUGUGGCUCAC	Translation	PREDICTED: Vigna unguiculata ankyrin repeat and zinc finger domain-containing protein 1 (LOC114185663), mRNA	1	Pre-60S factor REI1	DEO72_LG10g3434	NA	GO:0003676~nucleic acid binding	NA	NA
vun-miR171m-3p	XM_028074011.1	4.5	-1	1	20	3163	3182	UUGAGCCGCGUCAAUAUCUC	CGGGUAUUGACUCGGGUCGA	Cleavage	PREDICTED: Vigna unguiculata homeobox-leucine zipper protein ANTHOCYANINLESS 2-like (LOC114186019), mRNA	1	Homeobox-leucine zipper protein	DEO72_LG10g3465	Transcription factors [03000]	GO:0008289~lipid binding;GO:0043565~sequence-specific DNA binding	GO:0006355~regulation of transcription, DNA-templated	GO:0005634~nucleus
vun-miR171m-3p	XM_028074280.1	4	-1	1	20	1383	1402	UUGAGCCGCGUCAAUAUCUC	AAGGUUUUGAUGCAGCUUAA	Cleavage	PREDICTED: Vigna unguiculata bifunctional L-3-cyanoalanine synthase/cysteine synthase 1, mitochondrial (LOC114186237), transcript variant X1, mRNA	1	PALP domain-containing protein	ES332_A11G102300v1	Sulfur metabolism [00920]; Cysteine and methionine metabolism [00270]; Cyanoamino acid metabolism [00460]	NA	NA	NA
vun-miR171m-3p	XM_028074281.1	4	-1	1	20	1453	1472	UUGAGCCGCGUCAAUAUCUC	AAGGUUUUGAUGCAGCUUAA	Cleavage	PREDICTED: Vigna unguiculata bifunctional L-3-cyanoalanine synthase/cysteine synthase 1, mitochondrial (LOC114186237), transcript variant X2, mRNA	1	PALP domain-containing protein	ES332_A11G102300v1	Sulfur metabolism [00920]; Cysteine and methionine metabolism [00270]; Cyanoamino acid metabolism [00460]	NA	NA	NA
vun-miR171m-3p	XM_028074300.1	4.5	-1	1	20	2788	2807	UUGAGCCGCGUCAAUAUCUC	CAGAUAUUAGCUUGGCUUAA	Cleavage	PREDICTED: Vigna unguiculata receptor-like protein 7 (LOC114186257), mRNA	1	LRRNT_2 domain-containing protein	Vigan.04G053600 VIGAN_04053600	NA	NA	NA	GO:0016021~integral component of membrane
vun-miR171m-3p	XM_028074611.1	5	-1	1	20	537	556	UUGAGCCGCGUCAAUAUCUC	GAGAUACUGAUGUGGUUGAU	Cleavage	PREDICTED: Vigna unguiculata protein STRUBBELIG-RECEPTOR FAMILY 3-like (LOC114186645), transcript variant X1, mRNA	1	Serine/threonine-protein kinase PBS1	DEO72_LG1g326	NA	GO:0004672~protein kinase activity;GO:0005524~ATP binding	NA	GO:0016021~integral component of membrane
vun-miR171m-3p	XM_028074613.1	5	-1	1	20	538	557	UUGAGCCGCGUCAAUAUCUC	GAGAUACUGAUGUGGUUGAU	Cleavage	PREDICTED: Vigna unguiculata protein STRUBBELIG-RECEPTOR FAMILY 3-like (LOC114186645), transcript variant X3, mRNA	1	Serine/threonine-protein kinase PBS1	DEO72_LG1g326	NA	GO:0004672~protein kinase activity;GO:0005524~ATP binding	NA	GO:0016021~integral component of membrane
vun-miR171m-3p	XM_028074725.1	4	-1	1	20	709	728	UUGAGCCGCGUCAAUAUCUC	UAGAGAUUGAUGUGGUCCAA	Cleavage	PREDICTED: Vigna unguiculata protein PMR5 (LOC114186737), mRNA	1	Trichome birefringence-like 45/PMR5	DEO72_LG9g1441	NA	NA	NA	NA
vun-miR171m-3p	XM_028075336.1	4.5	-1	1	20	1553	1572	UUGAGCCGCGUCAAUAUCUC	CAGGUAUUGACGUUACUCAG	Cleavage	PREDICTED: Vigna unguiculata uncharacterized LOC114187174 (LOC114187174), transcript variant X1, mRNA	1	ANK_REP_REGION domain-containing protein	DEO72_LG1g1233	Membrane trafficking [04131]	NA	NA	NA
vun-miR171m-3p	XM_028075337.1	4.5	-1	1	20	1386	1405	UUGAGCCGCGUCAAUAUCUC	CAGGUAUUGACGUUACUCAG	Cleavage	PREDICTED: Vigna unguiculata uncharacterized LOC114187174 (LOC114187174), transcript variant X2, mRNA	1	ANK_REP_REGION domain-containing protein	DEO72_LG1g1233	Membrane trafficking [04131]	NA	NA	NA
vun-miR171m-3p	XM_028076342.1	3.5	-1	1	20	2076	2095	UUGAGCCGCGUCAAUAUCUC	UGGAUAUUGAAGCAGCUCAA	Translation	PREDICTED: Vigna unguiculata transcription factor bHLH13-like (LOC114187922), mRNA	1	Transcription factor MYC2	DEO72_LG1g1146	NA	GO:0046983~protein dimerization activity	NA	NA
vun-miR171m-3p	XM_028076401.1	5	-1	1	20	1665	1684	UUGAGCCGCGUCAAUAUCUC	GGGAUAUUGAUGAAGCUCAC	Cleavage	PREDICTED: Vigna unguiculata pentatricopeptide repeat-containing protein At1g51965, mitochondrial (LOC114187954), mRNA	1	Structure-specific endonuclease subunit SLX1	DEO72_LG1g1004	NA	GO:0004519~endonuclease activity	NA	NA
vun-miR171m-3p	XM_028076486.1	3	-1	1	20	2833	2852	UUGAGCCGCGUCAAUAUCUC	GAGGGAAUGACGUGGCUCAA	Cleavage	PREDICTED: Vigna unguiculata katanin p80 WD40 repeat-containing subunit B1 homolog (LOC114188012), transcript variant X1, mRNA	1	Katanin p80 WD40 repeat-containing subunit B1 homolog	DEO72_LG1g325	Cytoskeleton proteins [04812]	GO:0008017~microtubule binding;GO:0016301~kinase activity	GO:0051013~microtubule severing	GO:0005737~cytoplasm;GO:0005874~microtubule;GO:0008352~katanin complex
vun-miR171m-3p	XM_028076487.1	3	-1	1	20	2514	2533	UUGAGCCGCGUCAAUAUCUC	GAGGGAAUGACGUGGCUCAA	Cleavage	PREDICTED: Vigna unguiculata katanin p80 WD40 repeat-containing subunit B1 homolog (LOC114188012), transcript variant X2, mRNA	1	Katanin p80 WD40 repeat-containing subunit B1 homolog	DEO72_LG1g325	Cytoskeleton proteins [04812]	GO:0008017~microtubule binding;GO:0016301~kinase activity	GO:0051013~microtubule severing	GO:0005737~cytoplasm;GO:0005874~microtubule;GO:0008352~katanin complex
vun-miR171m-3p	XM_028077927.1	5	-1	1	20	429	449	UUGAGC-CGCGUCAAUAUCUC	GAGAUGUUGAUGUGAGUUCAA	Cleavage	PREDICTED: Vigna unguiculata 28 kDa heat- and acid-stable phosphoprotein (LOC114189215), transcript variant X1, mRNA	1	Casein kinase substrate	DEO72_LG1g435	NA	GO:0016301~kinase activity	NA	NA
vun-miR171m-3p	XM_028078230.1	4.5	-1	1	20	895	914	UUGAGCCGCGUCAAUAUCUC	CGUGUAUUGAUGCUGCUCAA	Cleavage	PREDICTED: Vigna unguiculata ATP-dependent DNA helicase SRS2-like protein At4g25120 (LOC114189612), transcript variant X1, mRNA	1	Retrovirus-related Pol polyprotein from transposon TNT 1-94	KK1_019599	NA	GO:0003676~nucleic acid binding	GO:0015074~DNA integration	NA
vun-miR171m-3p	XM_028078231.1	4.5	-1	1	20	895	914	UUGAGCCGCGUCAAUAUCUC	CGUGUAUUGAUGCUGCUCAA	Cleavage	PREDICTED: Vigna unguiculata ATP-dependent DNA helicase SRS2-like protein At4g25120 (LOC114189612), transcript variant X2, mRNA	1	Retrovirus-related Pol polyprotein from transposon TNT 1-94	KK1_019599	NA	GO:0003676~nucleic acid binding	GO:0015074~DNA integration	NA
vun-miR171m-3p	XM_028078740.1	4.5	-1	1	20	991	1010	UUGAGCCGCGUCAAUAUCUC	AGGAUGUCGAUGCGGCACAA	Cleavage	PREDICTED: Vigna unguiculata protein PTST, chloroplastic (LOC114189972), transcript variant X1, mRNA	1	5'-AMP-activated protein kinase	DEO72_LG6g3192	NA	GO:0016301~kinase activity	NA	NA
vun-miR171m-3p	XM_028078815.1	4.5	-1	1	20	1004	1023	UUGAGCCGCGUCAAUAUCUC	AGGAUGUCGAUGCGGCACAA	Cleavage	PREDICTED: Vigna unguiculata protein PTST, chloroplastic (LOC114189972), transcript variant X2, mRNA	1	5'-AMP-activated protein kinase	DEO72_LG6g3192	NA	GO:0016301~kinase activity	NA	NA
vun-miR171m-3p	XM_028078880.1	4.5	-1	1	20	1013	1032	UUGAGCCGCGUCAAUAUCUC	AGGAUGUCGAUGCGGCACAA	Cleavage	PREDICTED: Vigna unguiculata protein PTST, chloroplastic (LOC114189972), transcript variant X3, mRNA	1	5'-AMP-activated protein kinase	DEO72_LG6g3192	NA	GO:0016301~kinase activity	NA	NA
vun-miR171m-3p	XM_028078955.1	4.5	-1	1	20	932	951	UUGAGCCGCGUCAAUAUCUC	AGGAUGUCGAUGCGGCACAA	Cleavage	PREDICTED: Vigna unguiculata protein PTST, chloroplastic (LOC114189972), transcript variant X4, mRNA	1	5'-AMP-activated protein kinase	DEO72_LG6g3192	NA	GO:0016301~kinase activity	NA	NA
vun-miR171m-3p	XM_028079023.1	4.5	-1	1	20	883	902	UUGAGCCGCGUCAAUAUCUC	AGGAUGUCGAUGCGGCACAA	Cleavage	PREDICTED: Vigna unguiculata protein PTST, chloroplastic (LOC114189972), transcript variant X5, mRNA	1	5'-AMP-activated protein kinase	DEO72_LG6g3192	NA	GO:0016301~kinase activity	NA	NA
vun-miR171m-3p	XM_028079093.1	4.5	-1	1	20	930	949	UUGAGCCGCGUCAAUAUCUC	AGGAUGUCGAUGCGGCACAA	Cleavage	PREDICTED: Vigna unguiculata protein PTST, chloroplastic (LOC114189972), transcript variant X6, mRNA	1	5'-AMP-activated protein kinase	DEO72_LG6g3192	NA	GO:0016301~kinase activity	NA	NA
vun-miR171m-3p	XM_028079167.1	4.5	-1	1	20	943	962	UUGAGCCGCGUCAAUAUCUC	AGGAUGUCGAUGCGGCACAA	Cleavage	PREDICTED: Vigna unguiculata protein PTST, chloroplastic (LOC114189972), transcript variant X7, mRNA	1	5'-AMP-activated protein kinase	DEO72_LG6g3192	NA	GO:0016301~kinase activity	NA	NA
vun-miR171m-3p	XM_028079238.1	4.5	-1	1	20	952	971	UUGAGCCGCGUCAAUAUCUC	AGGAUGUCGAUGCGGCACAA	Cleavage	PREDICTED: Vigna unguiculata protein PTST, chloroplastic (LOC114189972), transcript variant X8, mRNA	1	5'-AMP-activated protein kinase	DEO72_LG6g3192	NA	GO:0016301~kinase activity	NA	NA
vun-miR171m-3p	XM_028079304.1	5	-1	1	20	1652	1671	UUGAGCCGCGUCAAUAUCUC	GAGAUUUUGGCUUGGCUCGC	Cleavage	PREDICTED: Vigna unguiculata probable L-type lectin-domain containing receptor kinase S.5 (LOC114190427), transcript variant X1, mRNA	1	Putative L-type lectin-domain containing receptor kinase S.5 (Fragment)	LECRKS5 CR513_27744	NA	GO:0004672~protein kinase activity;GO:0005524~ATP binding;GO:0030246~carbohydrate binding	NA	GO:0016021~integral component of membrane
vun-miR171m-3p	XM_028079305.1	5	-1	1	20	1567	1586	UUGAGCCGCGUCAAUAUCUC	GAGAUUUUGGCUUGGCUCGC	Cleavage	PREDICTED: Vigna unguiculata probable L-type lectin-domain containing receptor kinase S.5 (LOC114190427), transcript variant X2, mRNA	1	Putative L-type lectin-domain containing receptor kinase S.5 (Fragment)	LECRKS5 CR513_27744	NA	GO:0004672~protein kinase activity;GO:0005524~ATP binding;GO:0030246~carbohydrate binding	NA	GO:0016021~integral component of membrane
vun-miR171m-3p	XM_028079313.1	4.5	-1	1	20	871	890	UUGAGCCGCGUCAAUAUCUC	AGGAUGUCGAUGCGGCACAA	Cleavage	PREDICTED: Vigna unguiculata protein PTST, chloroplastic (LOC114189972), transcript variant X9, mRNA	1	5'-AMP-activated protein kinase	DEO72_LG6g3192	NA	GO:0016301~kinase activity	NA	NA
vun-miR171m-3p	XM_028079627.1	3.5	-1	1	20	751	770	UUGAGCCGCGUCAAUAUCUC	GGGACAUUGACGCUGCUCAG	Cleavage	PREDICTED: Vigna unguiculata elongation factor Ts, mitochondrial-like (LOC114190659), transcript variant X1, mRNA	1	Elongation factor Ts	DEO72_LG9g2420	NA	GO:0003746~translation elongation factor activity	NA	NA
vun-miR171m-3p	XM_028079628.1	3.5	-1	1	20	744	763	UUGAGCCGCGUCAAUAUCUC	GGGACAUUGACGCUGCUCAG	Cleavage	PREDICTED: Vigna unguiculata elongation factor Ts, mitochondrial-like (LOC114190659), transcript variant X3, mRNA	1	Elongation factor Ts	DEO72_LG9g2420	NA	GO:0003746~translation elongation factor activity	NA	NA
vun-miR171m-3p	XM_028080315.1	4.5	-1	1	20	304	323	UUGAGCCGCGUCAAUAUCUC	GAGGUAUUGUCGUGGUUCCA	Translation	PREDICTED: Vigna unguiculata uncharacterized LOC114191129 (LOC114191129), mRNA	1	Transposon Ty3-I Gag-Pol polyprotein	KK1_029624	NA	NA	NA	NA
vun-miR171m-3p	XM_028080768.1	4	-1	1	20	2626	2645	UUGAGCCGCGUCAAUAUCUC	GUGGUAUUGACAUGGUUCAA	Cleavage	PREDICTED: Vigna unguiculata receptor protein kinase-like protein At4g34220 (LOC114191542), mRNA	1	Protein brassinosteroid insensitive 1	DEO72_LG9g3520	NA	GO:0004672~protein kinase activity;GO:0005524~ATP binding	NA	GO:0016021~integral component of membrane
vun-miR171m-3p	XM_028081373.1	2.5	-1	1	20	86	105	UUGAGCCGCGUCAAUAUCUC	GAGAGGUUGGCGCGGCUCAG	Cleavage	PREDICTED: Vigna unguiculata uncharacterized LOC114191919 (LOC114191919), mRNA	1	Uncharacterized protein	DEO72_LG9g432	NA	NA	NA	GO:0016021~integral component of membrane
vun-miR171m-3p	XM_028081438.1	4.5	-1	1	20	648	667	UUGAGCCGCGUCAAUAUCUC	AAGGUGUUGAUGCGGUACAC	Cleavage	PREDICTED: Vigna unguiculata uncharacterized LOC114191959 (LOC114191959), transcript variant X1, mRNA	1	CCHC-type domain-containing protein	D0Y65_052214	NA	GO:0003676~nucleic acid binding;GO:0008270~zinc ion binding	NA	NA
vun-miR171m-3p	XM_028081446.1	4.5	-1	1	20	648	667	UUGAGCCGCGUCAAUAUCUC	AAGGUGUUGAUGCGGUACAC	Cleavage	PREDICTED: Vigna unguiculata uncharacterized LOC114191959 (LOC114191959), transcript variant X2, mRNA	1	CCHC-type domain-containing protein	D0Y65_052214	NA	GO:0003676~nucleic acid binding;GO:0008270~zinc ion binding	NA	NA
vun-miR171m-3p	XM_028081762.1	4.5	-1	1	20	1189	1208	UUGAGCCGCGUCAAUAUCUC	GAGGUGGUGGAGUGGCUCAA	Translation	PREDICTED: Vigna unguiculata PTI1-like tyrosine-protein kinase At3g15890 (LOC114192145), transcript variant X1, mRNA	1	Serine/threonine-protein kinase PBS1	DEO72_LG9g3292	NA	GO:0004672~protein kinase activity;GO:0005524~ATP binding	NA	NA
vun-miR171m-3p	XM_028081763.1	4.5	-1	1	20	1183	1202	UUGAGCCGCGUCAAUAUCUC	GAGGUGGUGGAGUGGCUCAA	Translation	PREDICTED: Vigna unguiculata PTI1-like tyrosine-protein kinase At3g15890 (LOC114192145), transcript variant X2, mRNA	1	Serine/threonine-protein kinase PBS1	DEO72_LG9g3292	NA	GO:0004672~protein kinase activity;GO:0005524~ATP binding	NA	NA
vun-miR171m-3p	XM_028082465.1	4.5	-1	1	20	1371	1390	UUGAGCCGCGUCAAUAUCUC	GGGAUACUGAUGCUGUUCAG	Cleavage	PREDICTED: Vigna unguiculata phytochrome A (LOC114192684), transcript variant X1, mRNA	1	Phytochrome	DEO72_LG9g2215	Circadian rhythm - plant [04712]	GO:0000155~phosphorelay sensor kinase activity;GO:0009881~photoreceptor activity;GO:0042803~protein homodimerization activity	GO:0006355~regulation of transcription, DNA-templated;GO:0009584~detection of visible light;GO:0009585~red, far-red light phototransduction;GO:0017006~protein-tetrapyrrole linkage;GO:0018298~protein-chromophore linkage	NA
vun-miR171m-3p	XM_028082466.1	4.5	-1	1	20	1516	1535	UUGAGCCGCGUCAAUAUCUC	GGGAUACUGAUGCUGUUCAG	Cleavage	PREDICTED: Vigna unguiculata phytochrome A (LOC114192684), transcript variant X2, mRNA	1	Phytochrome	DEO72_LG9g2215	Circadian rhythm - plant [04712]	GO:0000155~phosphorelay sensor kinase activity;GO:0009881~photoreceptor activity;GO:0042803~protein homodimerization activity	GO:0006355~regulation of transcription, DNA-templated;GO:0009584~detection of visible light;GO:0009585~red, far-red light phototransduction;GO:0017006~protein-tetrapyrrole linkage;GO:0018298~protein-chromophore linkage	NA
vun-miR171m-3p	XM_028082845.1	5	-1	1	20	1501	1520	UUGAGCCGCGUCAAUAUCUC	GGGAAAUUGAUUUGGCUCAU	Cleavage	PREDICTED: Vigna unguiculata serine/threonine-protein kinase MPS1-like (LOC114193141), transcript variant X1, mRNA	1	Protein ENHANCED DISEASE RESISTANCE 2 (EC 2.7.7.7)	D0Y65_001579	Spliceosome [03041]	GO:0003676~nucleic acid binding;GO:0003887~DNA-directed DNA polymerase activity;GO:0008289~lipid binding	GO:0015074~DNA integration	NA
vun-miR171m-3p	XM_028082846.1	5	-1	1	20	1501	1520	UUGAGCCGCGUCAAUAUCUC	GGGAAAUUGAUUUGGCUCAU	Cleavage	PREDICTED: Vigna unguiculata serine/threonine-protein kinase MPS1-like (LOC114193141), transcript variant X2, mRNA	1	Protein ENHANCED DISEASE RESISTANCE 2 (EC 2.7.7.7)	D0Y65_001579	Spliceosome [03041]	GO:0003676~nucleic acid binding;GO:0003887~DNA-directed DNA polymerase activity;GO:0008289~lipid binding	GO:0015074~DNA integration	NA
vun-miR171m-3p	XM_028082916.1	4	-1	1	20	1144	1163	UUGAGCCGCGUCAAUAUCUC	CAGAAGUUGGCGUGACUCAA	Cleavage	PREDICTED: Vigna unguiculata grpE protein homolog 2, mitochondrial (LOC114193197), mRNA	1	GrpE protein homolog	DEO72_LG7g3059	Mitochondrial biogenesis [03029]; Chaperones and folding catalysts [03110]	GO:0000774~adenyl-nucleotide exchange factor activity;GO:0042803~protein homodimerization activity;GO:0051087~chaperone binding	GO:0006457~protein folding	GO:0005759~mitochondrial matrix
vun-miR171m-3p	XM_028083327.1	3.5	-1	1	20	507	526	UUGAGCCGCGUCAAUAUCUC	GUGAUAUUGGUUCGGCUCAA	Cleavage	PREDICTED: Vigna unguiculata nodulation-signaling pathway 2 protein-like (LOC114193500), mRNA	1	DELLA protein	DEO72_LG7g1636	NA	NA	NA	NA
vun-miR171m-3p	XM_028085837.1	4.5	-1	1	20	117	136	UUGAGCCGCGUCAAUAUCUC	GAGAGAUUGAUGUGAUUUAA	Cleavage	PREDICTED: Vigna unguiculata probable serine/threonine-protein kinase PBL21 (LOC114195385), mRNA	1	Serine/threonine-protein kinase PBS1	DEO72_LG7g46	NA	GO:0004672~protein kinase activity;GO:0005524~ATP binding	NA	NA
vun-miR171m-3p	XM_028085987.1	5	-1	1	20	1087	1106	UUGAGCCGCGUCAAUAUCUC	GAGGUGUUGAUGCAGCUGAG	Cleavage	PREDICTED: Vigna unguiculata general transcription and DNA repair factor IIH subunit TFB2-like (LOC114195497), mRNA	1	RNA polymerase II transcription factor B subunit 2	DEO72_LG7g31	Basal transcription factors [03022]; DNA repair and recombination proteins [03400]; Transcription machinery [03021]; Nucleotide excision repair [03420]	GO:0001671~ATPase activator activity;GO:0003743~translation initiation factor activity	GO:0006289~nucleotide-excision repair	GO:0000439~core TFIIH complex
vun-miR171m-3p	XM_028086518.1	4	-1	1	20	173	192	UUGAGCCGCGUCAAUAUCUC	AAGAAGUUAACGUGGUUCAA	Cleavage	PREDICTED: Vigna unguiculata guanosine deaminase-like (LOC114196027), mRNA	1	CMP/dCMP-type deaminase domain-containing protein	Ahy_A09g044307	NA	GO:0003824~catalytic activity	NA	NA
vun-miR171m-3p	XM_028086519.1	4	-1	1	20	51	70	UUGAGCCGCGUCAAUAUCUC	AAGAAGUUAACGUGGUUCAA	Cleavage	PREDICTED: Vigna unguiculata guanosine deaminase-like (LOC114196028), transcript variant X1, mRNA	1	Guanine deaminase	DEO72_LG11g775	NA	GO:0008270~zinc ion binding;GO:0016787~hydrolase activity	NA	NA
vun-miR171m-3p	XM_028086521.1	4	-1	1	20	51	70	UUGAGCCGCGUCAAUAUCUC	AAGAAGUUAACGUGGUUCAA	Cleavage	PREDICTED: Vigna unguiculata guanosine deaminase-like (LOC114196028), transcript variant X2, mRNA	1	Guanine deaminase	DEO72_LG11g775	NA	GO:0008270~zinc ion binding;GO:0016787~hydrolase activity	NA	NA
vun-miR171m-3p	XM_028086752.1	4.5	-1	1	20	788	807	UUGAGCCGCGUCAAUAUCUC	CUGAUAUUGAUGCGGCAGAA	Cleavage	PREDICTED: Vigna unguiculata uncharacterized LOC114196189 (LOC114196189), mRNA	1	Uncharacterized protein	DEO72_LG11g3287	NA	NA	NA	GO:0016021~integral component of membrane
vun-miR171m-3p	XR_003599372.1	3.5	-1	1	20	537	556	UUGAGCCGCGUCAAUAUCUC	GUGAUAUUGGUUCGGCUCAA	Cleavage	PREDICTED: Vigna unguiculata pentatricopeptide repeat-containing protein At3g62890-like (LOC114163153), transcript variant X4, misc_RNA	1	NA	NA	NA	NA	NA	NA
vun-miR171m-3p	XR_003599373.1	3.5	-1	1	20	537	556	UUGAGCCGCGUCAAUAUCUC	GUGAUAUUGGUUCGGCUCAA	Cleavage	PREDICTED: Vigna unguiculata pentatricopeptide repeat-containing protein At3g62890-like (LOC114163153), transcript variant X5, misc_RNA	1	NA	NA	NA	NA	NA	NA
vun-miR171m-3p	XR_003599374.1	3.5	-1	1	20	537	556	UUGAGCCGCGUCAAUAUCUC	GUGAUAUUGGUUCGGCUCAA	Cleavage	PREDICTED: Vigna unguiculata pentatricopeptide repeat-containing protein At3g62890-like (LOC114163153), transcript variant X6, misc_RNA	1	NA	NA	NA	NA	NA	NA
vun-miR171m-3p	XR_003599375.1	3.5	-1	1	20	537	556	UUGAGCCGCGUCAAUAUCUC	GUGAUAUUGGUUCGGCUCAA	Cleavage	PREDICTED: Vigna unguiculata pentatricopeptide repeat-containing protein At3g62890-like (LOC114163153), transcript variant X7, misc_RNA	1	NA	NA	NA	NA	NA	NA
vun-miR171m-3p	XR_003600030.1	1	-1	1	20	1701	1720	UUGAGCCGCGUCAAUAUCUC	GGGAUAUUGGCGCGGCUCAA	Cleavage	PREDICTED: Vigna unguiculata scarecrow-like protein 6 (LOC114166860), transcript variant X1, misc_RNA	1	NA	NA	NA	NA	NA	NA
vun-miR171m-3p	XR_003603916.1	4	-1	1	20	3138	3157	UUGAGCCGCGUCAAUAUCUC	UGGCUAUUGAUGCUGCUCGA	Cleavage	PREDICTED: Vigna unguiculata probable serine/threonine-protein kinase SIS8 (LOC114181763), transcript variant X2, misc_RNA	1	NA	NA	NA	NA	NA	NA
vun-miR171m-3p	XR_003604083.1	4.5	-1	1	20	291	310	UUGAGCCGCGUCAAUAUCUC	UUUUUACUGACGUGGCUCAA	Cleavage	PREDICTED: Vigna unguiculata uncharacterized LOC114182417 (LOC114182417), ncRNA	1	NA	NA	NA	NA	NA	NA
vun-miR171m-3p	XR_003605837.1	3.5	-1	1	20	751	770	UUGAGCCGCGUCAAUAUCUC	GGGACAUUGACGCUGCUCAG	Cleavage	PREDICTED: Vigna unguiculata elongation factor Ts, mitochondrial-like (LOC114190659), transcript variant X2, misc_RNA	1	NA	NA	NA	NA	NA	NA
vun-miR171m-3p	XR_003606609.1	4	-1	1	20	51	70	UUGAGCCGCGUCAAUAUCUC	AAGAAGUUAACGUGGUUCAA	Cleavage	PREDICTED: Vigna unguiculata guanosine deaminase-like (LOC114196028), transcript variant X3, misc_RNA	1	NA	NA	NA	NA	NA	NA
vun-miR319f-3p	XM_028045882.1	5	-1	1	20	840	859	UUGGACUGAAGGGGCCUCUU	AAGAGGCCUUUCUAUUUCAA	Cleavage	PREDICTED: Vigna unguiculata U3 small nucleolar RNA-associated protein 25 (LOC114162107), transcript variant X1, mRNA	1	U3 small nucleolar RNA-associated protein 25	DEO72_LG7g2226	Ribosome biogenesis [03009]	NA	NA	GO:0005634~nucleus
vun-miR319f-3p	XM_028045883.1	5	-1	1	20	845	864	UUGGACUGAAGGGGCCUCUU	AAGAGGCCUUUCUAUUUCAA	Cleavage	PREDICTED: Vigna unguiculata U3 small nucleolar RNA-associated protein 25 (LOC114162107), transcript variant X2, mRNA	1	U3 small nucleolar RNA-associated protein 25	DEO72_LG7g2226	Ribosome biogenesis [03009]	NA	NA	GO:0005634~nucleus
vun-miR319f-3p	XM_028045884.1	5	-1	1	20	902	921	UUGGACUGAAGGGGCCUCUU	AAGAGGCCUUUCUAUUUCAA	Cleavage	PREDICTED: Vigna unguiculata U3 small nucleolar RNA-associated protein 25 (LOC114162107), transcript variant X3, mRNA	1	U3 small nucleolar RNA-associated protein 25	DEO72_LG7g2226	Ribosome biogenesis [03009]	NA	NA	GO:0005634~nucleus
vun-miR319f-3p	XM_028046440.1	5	-1	1	20	769	790	UUGGACUGAAGGGGC--CUCUU	AAGAGUCGUUCCUUUAGUUCAG	Cleavage	PREDICTED: Vigna unguiculata biotin--protein ligase 2-like (LOC114162520), transcript variant X1, mRNA	1	Biotin--protein ligase	DEO72_LG11g2826	Biotin metabolism [00780]	GO:0004077~biotin-[acetyl-CoA-carboxylase] ligase activity	GO:0006464~cellular protein modification process	NA
vun-miR319f-3p	XM_028046441.1	5	-1	1	20	769	790	UUGGACUGAAGGGGC--CUCUU	AAGAGUCGUUCCUUUAGUUCAG	Cleavage	PREDICTED: Vigna unguiculata biotin--protein ligase 2-like (LOC114162520), transcript variant X3, mRNA	1	Biotin--protein ligase	DEO72_LG11g2826	Biotin metabolism [00780]	GO:0004077~biotin-[acetyl-CoA-carboxylase] ligase activity	GO:0006464~cellular protein modification process	NA
vun-miR319f-3p	XM_028046442.1	5	-1	1	20	769	790	UUGGACUGAAGGGGC--CUCUU	AAGAGUCGUUCCUUUAGUUCAG	Cleavage	PREDICTED: Vigna unguiculata biotin--protein ligase 2-like (LOC114162520), transcript variant X4, mRNA	1	Biotin--protein ligase	DEO72_LG11g2826	Biotin metabolism [00780]	GO:0004077~biotin-[acetyl-CoA-carboxylase] ligase activity	GO:0006464~cellular protein modification process	NA
vun-miR319f-3p	XM_028047141.1	4.5	-1	1	20	739	758	UUGGACUGAAGGGGCCUCUU	AAGAAGUUCCUUCAGACUAG	Cleavage	PREDICTED: Vigna unguiculata quinone oxidoreductase-like protein 2 homolog (LOC114163075), transcript variant X1, mRNA	1	NADPH2:quinone reductase	DEO72_LG11g2416	Enzymes with EC numbers[99980]	GO:0008270~zinc ion binding;GO:0016491~oxidoreductase activity	NA	NA
vun-miR319f-3p	XM_028047142.1	4.5	-1	1	20	742	761	UUGGACUGAAGGGGCCUCUU	AAGAAGUUCCUUCAGACUAG	Cleavage	PREDICTED: Vigna unguiculata quinone oxidoreductase-like protein 2 homolog (LOC114163075), transcript variant X2, mRNA	1	NADPH2:quinone reductase	DEO72_LG11g2416	Enzymes with EC numbers[99980]	GO:0008270~zinc ion binding;GO:0016491~oxidoreductase activity	NA	NA
vun-miR319f-3p	XM_028047884.1	4.5	-1	1	20	2866	2885	UUGGACUGAAGGGGCCUCUU	AAGAGGCCCUUAGAGUUUAA	Cleavage	PREDICTED: Vigna unguiculata uncharacterized LOC114163579 (LOC114163579), mRNA	1	uncharacterized protein LOC106773250	LOC106773250	NA	GO:0003676~nucleic acid binding;GO:0004190~aspartic-type endopeptidase activity;GO:0008270~zinc ion binding	NA	NA
vun-miR319f-3p	XM_028048822.1	3.5	-1	1	20	1197	1216	UUGGACUGAAGGGGCCUCUU	AAGAAGUCUCUUUGGUCCAG	Cleavage	PREDICTED: Vigna unguiculata uncharacterized LOC114164234 (LOC114164234), transcript variant X1, mRNA	1	Uncharacterized protein	DEO72_LG11g3712	NA	NA	NA	NA
vun-miR319f-3p	XM_028048824.1	3.5	-1	1	20	1230	1249	UUGGACUGAAGGGGCCUCUU	AAGAAGUCUCUUUGGUCCAG	Cleavage	PREDICTED: Vigna unguiculata uncharacterized LOC114164234 (LOC114164234), transcript variant X2, mRNA	1	Uncharacterized protein	DEO72_LG11g3712	NA	NA	NA	NA
vun-miR319f-3p	XM_028049801.1	5	-1	1	20	46	65	UUGGACUGAAGGGGCCUCUU	AGGAGGCCGCUUGAGUUUGA	Cleavage	PREDICTED: Vigna unguiculata uncharacterized LOC114165134 (LOC114165134), mRNA	1	uncharacterized protein LOC106760269	LOC106760269	NA	NA	NA	NA
vun-miR319f-3p	XM_028051317.1	4.5	-1	1	20	920	939	UUGGACUGAAGGGGCCUCUU	GGGAGGCUCCUUCAGAAUAA	Cleavage	PREDICTED: Vigna unguiculata putative leucine-rich repeat receptor-like protein kinase At2g19210 (LOC114166568), mRNA	1	Interleukin-1 receptor-associated kinase 4	DEO72_LG8g304	NA	GO:0004672~protein kinase activity;GO:0005524~ATP binding	NA	GO:0016021~integral component of membrane
vun-miR319f-3p	XM_028051552.1	4.5	-1	1	20	828	847	UUGGACUGAAGGGGCCUCUU	AAGAGGUUGUUUCAGUGCAA	Cleavage	PREDICTED: Vigna unguiculata nuclear intron maturase 3, mitochondrial (LOC114166758), mRNA	1	Domain X	DEO72_LG8g2729	NA	NA	GO:0006397~mRNA processing	NA
vun-miR319f-3p	XM_028052379.1	4.5	-1	1	20	853	872	UUGGACUGAAGGGGCCUCUU	AAAGGGCUUCUUCACUCCGA	Cleavage	PREDICTED: Vigna unguiculata peroxidase P7-like (LOC114167320), mRNA	1	Peroxidase (EC 1.11.1.7)	DEO72_LG8g1165	Phenylpropanoid biosynthesis [00940]	GO:0004601~peroxidase activity;GO:0020037~heme binding;GO:0046872~metal ion binding	GO:0006979~response to oxidative stress;GO:0042744~hydrogen peroxide catabolic process	GO:0005576~extracellular region
vun-miR319f-3p	XM_028052873.1	4	-1	1	20	268	287	UUGGACUGAAGGGGCCUCUU	GAUGGGUUUUUUCAGUCCAG	Cleavage	PREDICTED: Vigna unguiculata G-type lectin S-receptor-like serine/threonine-protein kinase At4g27290 (LOC114168139), mRNA	1	Receptor-like serine/threonine-protein kinase (EC 2.7.11.1)	DEO72_LG3g565	NA	GO:0004674~protein serine/threonine kinase activity;GO:0005524~ATP binding	GO:0048544~recognition of pollen	GO:0016021~integral component of membrane
vun-miR319f-3p	XM_028053342.1	3.5	-1	1	20	2211	2230	UUGGACUGAAGGGGCCUCUU	GAGGGCCUCCUUCAGUUCAU	Cleavage	PREDICTED: Vigna unguiculata flowering time control protein FPA-like (LOC114168501), mRNA	1	Nucleolysin TIA-1/TIAR	DEO72_LG3g3015	NA	GO:0003723~RNA binding	NA	NA
vun-miR319f-3p	XM_028053633.1	3.5	-1	1	20	1374	1393	UUGGACUGAAGGGGCCUCUU	UGGAGCUCCCUUCACUCCAA	Cleavage	PREDICTED: Vigna unguiculata transcription factor MYB33-like (LOC114168722), transcript variant X1, mRNA	1	Myb proto-oncogene protein	DEO72_LG3g277	Transcription factors [03000]	GO:0003677~DNA binding	NA	GO:0005634~nucleus
vun-miR319f-3p	XM_028053634.1	3.5	-1	1	20	1233	1252	UUGGACUGAAGGGGCCUCUU	UGGAGCUCCCUUCACUCCAA	Cleavage	PREDICTED: Vigna unguiculata transcription factor MYB33-like (LOC114168722), transcript variant X2, mRNA	1	Myb proto-oncogene protein	DEO72_LG3g277	Transcription factors [03000]	GO:0003677~DNA binding	NA	GO:0005634~nucleus
vun-miR319f-3p	XM_028053635.1	3.5	-1	1	20	1168	1187	UUGGACUGAAGGGGCCUCUU	UGGAGCUCCCUUCACUCCAA	Cleavage	PREDICTED: Vigna unguiculata transcription factor MYB33-like (LOC114168722), transcript variant X3, mRNA	1	Myb proto-oncogene protein	DEO72_LG3g277	Transcription factors [03000]	GO:0003677~DNA binding	NA	GO:0005634~nucleus
vun-miR319f-3p	XM_028054414.1	3	-1	1	20	287	306	UUGGACUGAAGGGGCCUCUU	AAUGGGUUUCUUCAGUCCAA	Cleavage	PREDICTED: Vigna unguiculata G-type lectin S-receptor-like serine/threonine-protein kinase At4g27290 (LOC114169309), transcript variant X1, mRNA	1	Receptor-like serine/threonine-protein kinase (EC 2.7.11.1)	DEO72_LG3g1478	NA	GO:0004674~protein serine/threonine kinase activity;GO:0005524~ATP binding	GO:0048544~recognition of pollen	GO:0016021~integral component of membrane
vun-miR319f-3p	XM_028054415.1	3	-1	1	20	288	307	UUGGACUGAAGGGGCCUCUU	AAUGGGUUUCUUCAGUCCAA	Cleavage	PREDICTED: Vigna unguiculata G-type lectin S-receptor-like serine/threonine-protein kinase At4g27290 (LOC114169309), transcript variant X2, mRNA	1	Receptor-like serine/threonine-protein kinase (EC 2.7.11.1)	DEO72_LG3g1478	NA	GO:0004674~protein serine/threonine kinase activity;GO:0005524~ATP binding	GO:0048544~recognition of pollen	GO:0016021~integral component of membrane
vun-miR319f-3p	XM_028054416.1	3	-1	1	20	287	306	UUGGACUGAAGGGGCCUCUU	AAUGGGUUUCUUCAGUCCAA	Cleavage	PREDICTED: Vigna unguiculata G-type lectin S-receptor-like serine/threonine-protein kinase At4g27290 (LOC114169309), transcript variant X3, mRNA	1	Receptor-like serine/threonine-protein kinase (EC 2.7.11.1)	DEO72_LG3g1478	NA	GO:0004674~protein serine/threonine kinase activity;GO:0005524~ATP binding	GO:0048544~recognition of pollen	GO:0016021~integral component of membrane
vun-miR319f-3p	XM_028054418.1	3.5	-1	1	20	374	393	UUGGACUGAAGGGGCCUCUU	AAUGGGUUUCUUUAGUCCAA	Cleavage	PREDICTED: Vigna unguiculata G-type lectin S-receptor-like serine/threonine-protein kinase At4g27290 (LOC114169311), mRNA	1	Receptor-like serine/threonine-protein kinase (EC 2.7.11.1)	DEO72_LG3g1645	NA	GO:0004674~protein serine/threonine kinase activity;GO:0005524~ATP binding	GO:0048544~recognition of pollen	GO:0016021~integral component of membrane
vun-miR319f-3p	XM_028054507.1	4.5	-1	1	20	1187	1206	UUGGACUGAAGGGGCCUCUU	GUUUGGCUUUUUCAGUCCAA	Cleavage	PREDICTED: Vigna unguiculata aspartic proteinase CDR1-like (LOC114169368), mRNA	1	Aspartyl protease family protein	DEO72_LG3g58	NA	GO:0004190~aspartic-type endopeptidase activity	NA	NA
vun-miR319f-3p	XM_028054879.1	4.5	-1	1	20	53	72	UUGGACUGAAGGGGCCUCUU	AAGAGGUUCUUUCAGAUUGA	Cleavage	PREDICTED: Vigna unguiculata senescence-specific cysteine protease SAG39-like (LOC114169639), mRNA	1	Cathepsin L	DEO72_LG3g2103	NA	GO:0008234~cysteine-type peptidase activity	NA	NA
vun-miR319f-3p	XM_028055784.1	5	-1	1	20	3499	3518	UUGGACUGAAGGGGCCUCUU	AGGAGGCCGCUUGAGUUUGA	Cleavage	PREDICTED: Vigna unguiculata uncharacterized LOC114170304 (LOC114170304), mRNA	2	Uncharacterized protein	TSUD_411620	NA	GO:0003676~nucleic acid binding;GO:0004190~aspartic-type endopeptidase activity;GO:0008270~zinc ion binding	GO:0015074~DNA integration	NA
vun-miR319f-3p	XM_028055784.1	5	-1	1	20	4285	4304	UUGGACUGAAGGGGCCUCUU	AGGAGGCCGCUUAAGUUUGA	Cleavage	PREDICTED: Vigna unguiculata uncharacterized LOC114170304 (LOC114170304), mRNA	2	Uncharacterized protein	TSUD_411620	NA	GO:0003676~nucleic acid binding;GO:0004190~aspartic-type endopeptidase activity;GO:0008270~zinc ion binding	GO:0015074~DNA integration	NA
vun-miR319f-3p	XM_028055996.1	2.5	-1	1	20	1946	1965	UUGGACUGAAGGGGCCUCUU	AGGGGACCCCUUCAGUCCAG	Cleavage	PREDICTED: Vigna unguiculata transcription factor TCP4-like (LOC114170507), mRNA	1	Transcription factor TCP subgroup	DEO72_LG3g1849	NA	GO:0003700~sequence-specific DNA binding transcription factor activity	NA	NA
vun-miR319f-3p	XM_028056040.1	4	-1	1	20	345	364	UUGGACUGAAGGGGCCUCUU	GAGAGGCUCCUUGAGACCAG	Cleavage	PREDICTED: Vigna unguiculata PAP-specific phosphatase HAL2-like (LOC114170541), mRNA	1	Diphosphonucleoside phosphohydrolase	DEO72_LG3g1322	Transfer RNA biogenesis [03016]; Sulfur metabolism [00920]	GO:0008441~3'(2'),5'-bisphosphate nucleotidase activity	GO:0006790~sulfur compound metabolic process;GO:0046854~phosphatidylinositol phosphorylation	NA
vun-miR319f-3p	XM_028056088.1	4.5	-1	1	20	2774	2793	UUGGACUGAAGGGGCCUCUU	AGGUGGCUCCUUUAGUCUGU	Cleavage	PREDICTED: Vigna unguiculata helicase protein MOM1-like (LOC114170579), transcript variant X1, mRNA	1	Uncharacterized protein	DEO72_LG3g2713	NA	NA	GO:0006342~chromatin silencing	NA
vun-miR319f-3p	XM_028056089.1	4.5	-1	1	20	1443	1462	UUGGACUGAAGGGGCCUCUU	AGGUGGCUCCUUUAGUCUGU	Cleavage	PREDICTED: Vigna unguiculata helicase protein MOM1-like (LOC114170579), transcript variant X3, mRNA	1	Uncharacterized protein	DEO72_LG3g2713	NA	NA	GO:0006342~chromatin silencing	NA
vun-miR319f-3p	XM_028056973.1	5	-1	1	20	3727	3746	UUGGACUGAAGGGGCCUCUU	AGGAGGCCGCUUGAGUUUGA	Cleavage	PREDICTED: Vigna unguiculata uncharacterized LOC114172638 (LOC114172638), mRNA	1	Uncharacterized protein	TSUD_411620	NA	GO:0003676~nucleic acid binding;GO:0004190~aspartic-type endopeptidase activity;GO:0008270~zinc ion binding	GO:0015074~DNA integration	NA
vun-miR319f-3p	XM_028057291.1	4	-1	1	20	213	232	UUGGACUGAAGGGGCCUCUU	AAGAAGCUCUUUUAGUCGAA	Cleavage	PREDICTED: Vigna unguiculata ribonuclease P protein subunit p29 (LOC114173073), mRNA	1	Ribonuclease P protein subunit POP4	DEO72_LG4g2749	Mitochondrial biogenesis [03029]; Transfer RNA biogenesis [03016]; Ribosome biogenesis [03009]; Ribosome biogenesis in eukaryotes [03008]; RNA transport [03013]	GO:0003723~RNA binding;GO:0004540~ribonuclease activity	GO:0006396~RNA processing	GO:0030677~ribonuclease P complex
vun-miR319f-3p	XM_028058513.1	4.5	-1	1	20	1883	1902	UUGGACUGAAGGGGCCUCUU	AAGAAGCUUUUUCAGACUAA	Cleavage	PREDICTED: Vigna unguiculata DNA-directed RNA polymerase III subunit RPC5 (LOC114173862), mRNA	1	DNA-directed RNA polymerase III subunit RPC5	DEO72_LG4g2770	Transcription machinery [03021]; RNA polymerase [03020]	GO:0003899~DNA-directed RNA polymerase activity	GO:0006351~transcription, DNA-templated	GO:0005634~nucleus
vun-miR319f-3p	XM_028059850.1	5	-1	1	20	181	200	UUGGACUGAAGGGGCCUCUU	AGGAGGCCACUUGAGUUUGA	Cleavage	PREDICTED: Vigna unguiculata uncharacterized LOC114175093 (LOC114175093), mRNA	1	uncharacterized protein LOC106753428	LOC106753428	NA	NA	NA	NA
vun-miR319f-3p	XM_028059865.1	5	-1	1	20	181	200	UUGGACUGAAGGGGCCUCUU	AGGAGGCCGCUUGAGUUUGA	Cleavage	PREDICTED: Vigna unguiculata uncharacterized LOC114175107 (LOC114175107), mRNA	1	uncharacterized protein LOC106753428	LOC106753428	NA	NA	NA	NA
vun-miR319f-3p	XM_028060106.1	5	-1	1	20	46	65	UUGGACUGAAGGGGCCUCUU	AGGAGGCCACUUGAGUUUGA	Cleavage	PREDICTED: Vigna unguiculata uncharacterized LOC114175327 (LOC114175327), mRNA	1	uncharacterized protein LOC106760269	LOC106760269	NA	NA	NA	NA
vun-miR319f-3p	XM_028060182.1	4.5	-1	1	20	1494	1513	UUGGACUGAAGGGGCCUCUU	AGGAAGCUCCUUCCGUUCAG	Cleavage	PREDICTED: Vigna unguiculata recQ-mediated genome instability protein 1 (LOC114175416), mRNA	1	Protein RMI1-like protein	DEO72_LG2g5352	DNA repair and recombination proteins [03400]	GO:0000166~nucleotide binding	NA	GO:0031422~RecQ helicase-Topo III complex
vun-miR319f-3p	XM_028060563.1	4.5	-1	1	20	1654	1673	UUGGACUGAAGGGGCCUCUU	AAGAAGCUUCUUCUGUUUAA	Cleavage	PREDICTED: Vigna unguiculata disease resistance-like protein DSC1 (LOC114175769), transcript variant X1, mRNA	1	Disease resistance protein RPM1	DEO72_LG2g3228	NA	GO:0043531~ADP binding	NA	NA
vun-miR319f-3p	XM_028060564.1	4.5	-1	1	20	1654	1673	UUGGACUGAAGGGGCCUCUU	AAGAAGCUUCUUCUGUUUAA	Cleavage	PREDICTED: Vigna unguiculata disease resistance-like protein DSC1 (LOC114175769), transcript variant X2, mRNA	1	Disease resistance protein RPM1	DEO72_LG2g3228	NA	GO:0043531~ADP binding	NA	NA
vun-miR319f-3p	XM_028060883.1	4.5	-1	1	20	1110	1129	UUGGACUGAAGGGGCCUCUU	AUUAGGUCCCUUUAGUCAAA	Cleavage	PREDICTED: Vigna unguiculata protein MICROTUBULE BINDING PROTEIN 2C (LOC114176008), mRNA	1	Uncharacterized protein	DEO72_LG2g1107	NA	GO:0008017~microtubule binding	GO:0010497~plasmodesmata-mediated intercellular transport	NA
vun-miR319f-3p	XM_028063099.1	4.5	-1	1	20	568	587	UUGGACUGAAGGGGCCUCUU	GGGAGGUUCCUUUAUUCUGA	Cleavage	PREDICTED: Vigna unguiculata uncharacterized LOC114177659 (LOC114177659), mRNA	1	Uncharacterized protein	DEO72_LG6g463	NA	NA	NA	GO:0016021~integral component of membrane
vun-miR319f-3p	XM_028063216.1	4	-1	1	20	1875	1894	UUGGACUGAAGGGGCCUCUU	UUCCGGCCUCUUCAGUUCAA	Cleavage	PREDICTED: Vigna unguiculata 110 kDa U5 small nuclear ribonucleoprotein component CLO (LOC114177725), mRNA	1	U5 small nuclear ribonucleoprotein component	DEO72_LG2g882	Spliceosome [03041]; Spliceosome [03040]	GO:0003924~GTPase activity;GO:0005525~GTP binding	NA	NA
vun-miR319f-3p	XM_028063220.1	4.5	-1	1	20	950	969	UUGGACUGAAGGGGCCUCUU	AAGAGGUCUUUUUGGUGCGA	Cleavage	PREDICTED: Vigna unguiculata uncharacterized LOC114177728 (LOC114177728), mRNA	1	Bifunctional lysine-specific demethylase and histidyl-hydroxylase (EC 1.14.11.-)	DEO72_LG2g629	Ribosome biogenesis [03009]; Chromosome and associated proteins [03036]	GO:0005506~iron ion binding;GO:0016706~oxidoreductase activity, acting on paired donors, with incorporation or reduction of molecular oxygen, 2-oxoglutarate as one donor, and incorporation of one atom each of oxygen into both donors	NA	GO:0005634~nucleus
vun-miR319f-3p	XM_028063337.1	4.5	-1	1	20	1050	1070	UUGGACUGAAGGGG-CCUCUU	AGGAGGACUCCUUCAGACCAA	Cleavage	PREDICTED: Vigna unguiculata B2 protein (LOC114177799), mRNA	1	Cleavage and polyadenylation specificity factor subunit 4	DEO72_LG2g5504	NA	NA	NA	NA
vun-miR319f-3p	XM_028064362.1	2.5	-1	1	20	1268	1287	UUGGACUGAAGGGGCCUCUU	CAGAGUCCCUUUUAGUUCAA	Cleavage	PREDICTED: Vigna unguiculata probable phosphoinositide phosphatase SAC9 (LOC114178447), mRNA	1	Mannosyl-oligosaccharide alpha-1	DEO72_LG2g3433	NA	GO:0042578~phosphoric ester hydrolase activity	NA	NA
vun-miR319f-3p	XM_028066010.1	4.5	-1	1	20	789	808	UUGGACUGAAGGGGCCUCUU	AAGGUGUCCCGUCAGUCUGA	Translation	PREDICTED: Vigna unguiculata PHD finger protein Alfin1 (LOC114179604), transcript variant X1, mRNA	1	Nucleosome-remodeling factor subunit BPTF	DEO72_LG2g178	NA	GO:0042393~histone binding;GO:0046872~metal ion binding	GO:0006355~regulation of transcription, DNA-templated	NA
vun-miR319f-3p	XM_028066011.1	4.5	-1	1	20	649	668	UUGGACUGAAGGGGCCUCUU	AAGGUGUCCCGUCAGUCUGA	Translation	PREDICTED: Vigna unguiculata PHD finger protein Alfin1 (LOC114179604), transcript variant X2, mRNA	1	Nucleosome-remodeling factor subunit BPTF	DEO72_LG2g178	NA	GO:0042393~histone binding;GO:0046872~metal ion binding	GO:0006355~regulation of transcription, DNA-templated	NA
vun-miR319f-3p	XM_028066071.1	4	-1	1	20	624	643	UUGGACUGAAGGGGCCUCUU	AAUGGCUCUCUUCAGUUCAA	Cleavage	PREDICTED: Vigna unguiculata serine/threonine-protein kinase-like protein ACR4 (LOC114179658), mRNA	1	Kinase/ transmembrane receptor protein kinase	DEO72_LG2g4769	Protein kinases [01001]	GO:0004672~protein kinase activity;GO:0005524~ATP binding	NA	GO:0016021~integral component of membrane
vun-miR319f-3p	XM_028066296.1	4	-1	1	20	354	373	UUGGACUGAAGGGGCCUCUU	GGGGUGCCCCUUCAUUUCAA	Cleavage	PREDICTED: Vigna unguiculata peptidyl-prolyl cis-trans isomerase CYP40-like (LOC114179830), transcript variant X1, mRNA	1	Peptidyl-prolyl isomerase D	DEO72_LG2g3505	Chaperones and folding catalysts [03110]	GO:0003755~peptidyl-prolyl cis-trans isomerase activity	GO:0006457~protein folding	NA
vun-miR319f-3p	XM_028066298.1	4	-1	1	20	459	478	UUGGACUGAAGGGGCCUCUU	GGGGUGCCCCUUCAUUUCAA	Cleavage	PREDICTED: Vigna unguiculata peptidyl-prolyl cis-trans isomerase CYP40-like (LOC114179830), transcript variant X2, mRNA	1	Peptidyl-prolyl isomerase D	DEO72_LG2g3505	Chaperones and folding catalysts [03110]	GO:0003755~peptidyl-prolyl cis-trans isomerase activity	GO:0006457~protein folding	NA
vun-miR319f-3p	XM_028066299.1	4	-1	1	20	503	522	UUGGACUGAAGGGGCCUCUU	GGGGUGCCCCUUCAUUUCAA	Cleavage	PREDICTED: Vigna unguiculata peptidyl-prolyl cis-trans isomerase CYP40-like (LOC114179830), transcript variant X3, mRNA	1	Peptidyl-prolyl isomerase D	DEO72_LG2g3505	Chaperones and folding catalysts [03110]	GO:0003755~peptidyl-prolyl cis-trans isomerase activity	GO:0006457~protein folding	NA
vun-miR319f-3p	XM_028066932.1	5	-1	1	20	46	65	UUGGACUGAAGGGGCCUCUU	AGGAGGCCGCUUGAGUUUGA	Cleavage	PREDICTED: Vigna unguiculata uncharacterized LOC114180631 (LOC114180631), mRNA	1	uncharacterized protein LOC106760269	LOC106760269	NA	NA	NA	NA
vun-miR319f-3p	XM_028067375.1	4.5	-1	1	20	1010	1029	UUGGACUGAAGGGGCCUCUU	AGGAGGCCUCUUUAUUCCCA	Cleavage	PREDICTED: Vigna unguiculata protein COFACTOR ASSEMBLY OF COMPLEX C SUBUNIT B CCB2, chloroplastic (LOC114181054), transcript variant X1, mRNA	1	Uncharacterized protein	Vigan.11G192500 VIGAN_11192500	NA	NA	NA	GO:0016021~integral component of membrane
vun-miR319f-3p	XM_028067492.1	4.5	-1	1	20	1189	1208	UUGGACUGAAGGGGCCUCUU	AGGAGACCCUUUUGAUCCAA	Cleavage	PREDICTED: Vigna unguiculata aldehyde dehydrogenase family 2 member C4-like (LOC114181137), transcript variant X1, mRNA	1	Coniferyl-aldehyde dehydrogenase	DEO72_LG5g178	Phenylpropanoid biosynthesis [00940]	GO:0016620~oxidoreductase activity, acting on the aldehyde or oxo group of donors, NAD or NADP as acceptor	NA	NA
vun-miR319f-3p	XM_028067493.1	4.5	-1	1	20	1051	1070	UUGGACUGAAGGGGCCUCUU	AGGAGACCCUUUUGAUCCAA	Cleavage	PREDICTED: Vigna unguiculata aldehyde dehydrogenase family 2 member C4-like (LOC114181137), transcript variant X2, mRNA	1	Coniferyl-aldehyde dehydrogenase	DEO72_LG5g178	Phenylpropanoid biosynthesis [00940]	GO:0016620~oxidoreductase activity, acting on the aldehyde or oxo group of donors, NAD or NADP as acceptor	NA	NA
vun-miR319f-3p	XM_028068925.1	3.5	-1	1	20	2474	2493	UUGGACUGAAGGGGCCUCUU	AUGAAGCCUCUUCGGUCCAG	Cleavage	PREDICTED: Vigna unguiculata putative pentatricopeptide repeat-containing protein At5g65820 (LOC114182144), transcript variant X1, mRNA	1	Nucleobase:cation symporter-1	DEO72_LG5g3070	NA	NA	NA	NA
vun-miR319f-3p	XM_028068926.1	3.5	-1	1	20	2482	2501	UUGGACUGAAGGGGCCUCUU	AUGAAGCCUCUUCGGUCCAG	Cleavage	PREDICTED: Vigna unguiculata putative pentatricopeptide repeat-containing protein At5g65820 (LOC114182144), transcript variant X2, mRNA	1	Nucleobase:cation symporter-1	DEO72_LG5g3070	NA	NA	NA	NA
vun-miR319f-3p	XM_028070377.1	4.5	-1	1	20	2517	2536	UUGGACUGAAGGGGCCUCUU	UGGAGGUUCUUGCAGUCCAC	Cleavage	PREDICTED: Vigna unguiculata protein SIEL (LOC114183366), mRNA	1	Integrator complex subunit 4	DEO72_LG10g3304	Spliceosome [03041]	NA	NA	NA
vun-miR319f-3p	XM_028070417.1	5	-1	1	20	751	770	UUGGACUGAAGGGGCCUCUU	AAGAGGCCCUUUUAUCUCGA	Cleavage	PREDICTED: Vigna unguiculata uncharacterized FCP1 homology domain-containing protein C1271.03c-like (LOC114183405), transcript variant X1, mRNA	1	FCP1 homology domain-containing protein	DEO72_LG10g3929	NA	NA	NA	NA
vun-miR319f-3p	XM_028070418.1	5	-1	1	20	752	771	UUGGACUGAAGGGGCCUCUU	AAGAGGCCCUUUUAUCUCGA	Cleavage	PREDICTED: Vigna unguiculata uncharacterized FCP1 homology domain-containing protein C1271.03c-like (LOC114183405), transcript variant X2, mRNA	1	FCP1 homology domain-containing protein	DEO72_LG10g3929	NA	NA	NA	NA
vun-miR319f-3p	XM_028070482.1	4.5	-1	1	20	1101	1120	UUGGACUGAAGGGGCCUCUU	AUUGGGUUUCUUCAGUCCAG	Cleavage	PREDICTED: Vigna unguiculata G-type lectin S-receptor-like serine/threonine-protein kinase At4g27290 (LOC114183459), transcript variant X1, mRNA	1	Receptor-like serine/threonine-protein kinase (EC 2.7.11.1)	DEO72_LG10g1071	NA	GO:0004674~protein serine/threonine kinase activity;GO:0005524~ATP binding	GO:0048544~recognition of pollen	GO:0016021~integral component of membrane
vun-miR319f-3p	XM_028070483.1	4.5	-1	1	20	1237	1256	UUGGACUGAAGGGGCCUCUU	AUUGGGUUUCUUCAGUCCAG	Cleavage	PREDICTED: Vigna unguiculata G-type lectin S-receptor-like serine/threonine-protein kinase At4g27290 (LOC114183459), transcript variant X2, mRNA	1	Receptor-like serine/threonine-protein kinase (EC 2.7.11.1)	DEO72_LG10g1071	NA	GO:0004674~protein serine/threonine kinase activity;GO:0005524~ATP binding	GO:0048544~recognition of pollen	GO:0016021~integral component of membrane
vun-miR319f-3p	XM_028070484.1	4.5	-1	1	20	1151	1170	UUGGACUGAAGGGGCCUCUU	AUUGGGUUUCUUCAGUCCAG	Cleavage	PREDICTED: Vigna unguiculata G-type lectin S-receptor-like serine/threonine-protein kinase At4g27290 (LOC114183459), transcript variant X3, mRNA	1	Receptor-like serine/threonine-protein kinase (EC 2.7.11.1)	DEO72_LG10g1071	NA	GO:0004674~protein serine/threonine kinase activity;GO:0005524~ATP binding	GO:0048544~recognition of pollen	GO:0016021~integral component of membrane
vun-miR319f-3p	XM_028070850.1	4.5	-1	1	20	113	132	UUGGACUGAAGGGGCCUCUU	CCGAGGUUCCUUUAGCUCAA	Cleavage	PREDICTED: Vigna unguiculata ranBP2-type zinc finger protein At1g67325-like (LOC114183733), transcript variant X1, mRNA	1	DNA polymerase zeta subunit	DEO72_LG10g3768	NA	NA	NA	NA
vun-miR319f-3p	XM_028070851.1	4.5	-1	1	20	113	132	UUGGACUGAAGGGGCCUCUU	CCGAGGUUCCUUUAGCUCAA	Cleavage	PREDICTED: Vigna unguiculata ranBP2-type zinc finger protein At1g67325-like (LOC114183733), transcript variant X2, mRNA	1	DNA polymerase zeta subunit	DEO72_LG10g3768	NA	NA	NA	NA
vun-miR319f-3p	XM_028070852.1	4.5	-1	1	20	113	132	UUGGACUGAAGGGGCCUCUU	CCGAGGUUCCUUUAGCUCAA	Cleavage	PREDICTED: Vigna unguiculata ranBP2-type zinc finger protein At1g67325-like (LOC114183733), transcript variant X3, mRNA	1	DNA polymerase zeta subunit	DEO72_LG10g3768	NA	NA	NA	NA
vun-miR319f-3p	XM_028070853.1	4.5	-1	1	20	113	132	UUGGACUGAAGGGGCCUCUU	CCGAGGUUCCUUUAGCUCAA	Cleavage	PREDICTED: Vigna unguiculata ranBP2-type zinc finger protein At1g67325-like (LOC114183733), transcript variant X4, mRNA	1	DNA polymerase zeta subunit	DEO72_LG10g3768	NA	NA	NA	NA
vun-miR319f-3p	XM_028070854.1	4.5	-1	1	20	107	126	UUGGACUGAAGGGGCCUCUU	CCGAGGUUCCUUUAGCUCAA	Cleavage	PREDICTED: Vigna unguiculata ranBP2-type zinc finger protein At1g67325-like (LOC114183733), transcript variant X5, mRNA	1	DNA polymerase zeta subunit	DEO72_LG10g3768	NA	NA	NA	NA
vun-miR319f-3p	XM_028071529.1	5	-1	1	20	1295	1314	UUGGACUGAAGGGGCCUCUU	AGGAGGCUUCUGCAGAUCAA	Cleavage	PREDICTED: Vigna unguiculata ATP-dependent 6-phosphofructokinase 3-like (LOC114184246), transcript variant X1, mRNA	1	ATP-dependent 6-phosphofructokinase (ATP-PFK) (Phosphofructokinase) (EC 2.7.1.11) (Phosphohexokinase)	PFK DEO72_LG10g233	PATHWAY: Carbohydrate degradation; glycolysis; D-glyceraldehyde 3-phosphate and glycerone phosphate from D-glucose: step 3/4. {ECO:0000256|HAMAP-Rule:MF_03186}.; Messenger RNA biogenesis [03019]; Fructose and mannose metabolism [00051]; Pentose phosphate pathway [00030]; Galactose metabolism [00052]; Protein phosphatases and associated proteins [01009]; Glycolysis / Gluconeogenesis [00010]; RNA d…	GO:0003872~6-phosphofructokinase activity;GO:0005524~ATP binding;GO:0046872~metal ion binding	GO:0006002~fructose 6-phosphate metabolic process	GO:0005737~cytoplasm
vun-miR319f-3p	XM_028071530.1	5	-1	1	20	1082	1101	UUGGACUGAAGGGGCCUCUU	AGGAGGCUUCUGCAGAUCAA	Cleavage	PREDICTED: Vigna unguiculata ATP-dependent 6-phosphofructokinase 3-like (LOC114184246), transcript variant X2, mRNA	1	ATP-dependent 6-phosphofructokinase (ATP-PFK) (Phosphofructokinase) (EC 2.7.1.11) (Phosphohexokinase)	PFK DEO72_LG10g233	PATHWAY: Carbohydrate degradation; glycolysis; D-glyceraldehyde 3-phosphate and glycerone phosphate from D-glucose: step 3/4. {ECO:0000256|HAMAP-Rule:MF_03186}.; Messenger RNA biogenesis [03019]; Fructose and mannose metabolism [00051]; Pentose phosphate pathway [00030]; Galactose metabolism [00052]; Protein phosphatases and associated proteins [01009]; Glycolysis / Gluconeogenesis [00010]; RNA d…	GO:0003872~6-phosphofructokinase activity;GO:0005524~ATP binding;GO:0046872~metal ion binding	GO:0006002~fructose 6-phosphate metabolic process	GO:0005737~cytoplasm
vun-miR319f-3p	XM_028071681.1	5	-1	1	20	46	65	UUGGACUGAAGGGGCCUCUU	AGGAGGCCGCUUGAGUUUGA	Cleavage	PREDICTED: Vigna unguiculata uncharacterized LOC114184368 (LOC114184368), mRNA	1	uncharacterized protein LOC106753428	LOC106753428	NA	NA	NA	NA
vun-miR319f-3p	XM_028072257.1	4	-1	1	20	1444	1463	UUGGACUGAAGGGGCCUCUU	AAAAGAUUCCUUCAGUUUAA	Cleavage	PREDICTED: Vigna unguiculata G-type lectin S-receptor-like serine/threonine-protein kinase At1g11300 (LOC114184880), transcript variant X1, mRNA	1	Interleukin-1 receptor-associated kinase 4	DEO72_LG10g2788	NA	GO:0004672~protein kinase activity;GO:0005524~ATP binding	GO:0048544~recognition of pollen	GO:0016021~integral component of membrane
vun-miR319f-3p	XM_028072258.1	4	-1	1	20	1441	1460	UUGGACUGAAGGGGCCUCUU	AAAAGAUUCCUUCAGUUUAA	Cleavage	PREDICTED: Vigna unguiculata G-type lectin S-receptor-like serine/threonine-protein kinase At1g11300 (LOC114184880), transcript variant X2, mRNA	1	Interleukin-1 receptor-associated kinase 4	DEO72_LG10g2788	NA	GO:0004672~protein kinase activity;GO:0005524~ATP binding	GO:0048544~recognition of pollen	GO:0016021~integral component of membrane
vun-miR319f-3p	XM_028072259.1	4	-1	1	20	1442	1461	UUGGACUGAAGGGGCCUCUU	AAAAGAUUCCUUCAGUUUAA	Cleavage	PREDICTED: Vigna unguiculata G-type lectin S-receptor-like serine/threonine-protein kinase At1g11300 (LOC114184880), transcript variant X3, mRNA	1	Interleukin-1 receptor-associated kinase 4	DEO72_LG10g2788	NA	GO:0004672~protein kinase activity;GO:0005524~ATP binding	GO:0048544~recognition of pollen	GO:0016021~integral component of membrane
vun-miR319f-3p	XM_028072260.1	4	-1	1	20	1439	1458	UUGGACUGAAGGGGCCUCUU	AAAAGAUUCCUUCAGUUUAA	Cleavage	PREDICTED: Vigna unguiculata G-type lectin S-receptor-like serine/threonine-protein kinase At1g11300 (LOC114184880), transcript variant X4, mRNA	1	Interleukin-1 receptor-associated kinase 4	DEO72_LG10g2788	NA	GO:0004672~protein kinase activity;GO:0005524~ATP binding	GO:0048544~recognition of pollen	GO:0016021~integral component of membrane
vun-miR319f-3p	XM_028072261.1	4	-1	1	20	1444	1463	UUGGACUGAAGGGGCCUCUU	AAAAGAUUCCUUCAGUUUAA	Cleavage	PREDICTED: Vigna unguiculata G-type lectin S-receptor-like serine/threonine-protein kinase At1g11300 (LOC114184881), transcript variant X1, mRNA	1	Interleukin-1 receptor-associated kinase 4	DEO72_LG10g2788	NA	GO:0004672~protein kinase activity;GO:0005524~ATP binding	GO:0048544~recognition of pollen	GO:0016021~integral component of membrane
vun-miR319f-3p	XM_028072262.1	4	-1	1	20	1441	1460	UUGGACUGAAGGGGCCUCUU	AAAAGAUUCCUUCAGUUUAA	Cleavage	PREDICTED: Vigna unguiculata G-type lectin S-receptor-like serine/threonine-protein kinase At1g11300 (LOC114184881), transcript variant X2, mRNA	1	Interleukin-1 receptor-associated kinase 4	DEO72_LG10g2788	NA	GO:0004672~protein kinase activity;GO:0005524~ATP binding	GO:0048544~recognition of pollen	GO:0016021~integral component of membrane
vun-miR319f-3p	XM_028072264.1	4	-1	1	20	1442	1461	UUGGACUGAAGGGGCCUCUU	AAAAGAUUCCUUCAGUUUAA	Cleavage	PREDICTED: Vigna unguiculata G-type lectin S-receptor-like serine/threonine-protein kinase At1g11300 (LOC114184881), transcript variant X3, mRNA	1	Interleukin-1 receptor-associated kinase 4	DEO72_LG10g2788	NA	GO:0004672~protein kinase activity;GO:0005524~ATP binding	GO:0048544~recognition of pollen	GO:0016021~integral component of membrane
vun-miR319f-3p	XM_028072291.1	5	-1	1	20	697	716	UUGGACUGAAGGGGCCUCUU	AAGGGGCCACUCUAGUCUAG	Cleavage	PREDICTED: Vigna unguiculata protein HIRA (LOC114184903), transcript variant X1, mRNA	1	Protein HIRA	DEO72_LG10g668	Chromosome and associated proteins [03036]	NA	GO:0006325~chromatin organization;GO:0006351~transcription, DNA-templated;GO:0006355~regulation of transcription, DNA-templated	GO:0005634~nucleus
vun-miR319f-3p	XM_028072292.1	5	-1	1	20	1021	1040	UUGGACUGAAGGGGCCUCUU	AAGGGGCCACUCUAGUCUAG	Cleavage	PREDICTED: Vigna unguiculata protein HIRA (LOC114184903), transcript variant X2, mRNA	1	Protein HIRA	DEO72_LG10g668	Chromosome and associated proteins [03036]	NA	GO:0006325~chromatin organization;GO:0006351~transcription, DNA-templated;GO:0006355~regulation of transcription, DNA-templated	GO:0005634~nucleus
vun-miR319f-3p	XM_028072293.1	5	-1	1	20	697	716	UUGGACUGAAGGGGCCUCUU	AAGGGGCCACUCUAGUCUAG	Cleavage	PREDICTED: Vigna unguiculata protein HIRA (LOC114184903), transcript variant X3, mRNA	1	Protein HIRA	DEO72_LG10g668	Chromosome and associated proteins [03036]	NA	GO:0006325~chromatin organization;GO:0006351~transcription, DNA-templated;GO:0006355~regulation of transcription, DNA-templated	GO:0005634~nucleus
vun-miR319f-3p	XM_028072294.1	5	-1	1	20	337	356	UUGGACUGAAGGGGCCUCUU	AAGGGGCCACUCUAGUCUAG	Cleavage	PREDICTED: Vigna unguiculata protein HIRA (LOC114184903), transcript variant X4, mRNA	1	Protein HIRA	DEO72_LG10g668	Chromosome and associated proteins [03036]	NA	GO:0006325~chromatin organization;GO:0006351~transcription, DNA-templated;GO:0006355~regulation of transcription, DNA-templated	GO:0005634~nucleus
vun-miR319f-3p	XM_028072308.1	2.5	-1	1	20	1699	1718	UUGGACUGAAGGGGCCUCUU	AGGGGACCCCUUCAGUCCAG	Cleavage	PREDICTED: Vigna unguiculata transcription factor PCF5-like (LOC114184913), mRNA	1	Transcription factor TCP subgroup	DEO72_LG10g1251	NA	GO:0003700~sequence-specific DNA binding transcription factor activity	NA	NA
vun-miR319f-3p	XM_028072882.1	4.5	-1	1	20	431	452	UUGGACUGAAGGGGCC--UCUU	GAGAAUGGCCCUUUCAGACCAA	Cleavage	PREDICTED: Vigna unguiculata serine carboxypeptidase-like 45 (LOC114185257), mRNA	1	Carboxypeptidase (EC 3.4.16.-)	LR48_Vigan02g047800	Peptidases and inhibitors [01002]	GO:0004185~serine-type carboxypeptidase activity	NA	NA
vun-miR319f-3p	XM_028072893.1	4	-1	1	20	1990	2009	UUGGACUGAAGGGGCCUCUU	AAGAUGUCCUUUCAGUAUAA	Cleavage	PREDICTED: Vigna unguiculata probable ubiquitin-conjugating enzyme E2 25 (LOC114185266), mRNA	2	Ubiquitin-conjugating enzyme E2 O	DEO72_LG10g1160	Ubiquitin system [04121]; Ubiquitin mediated proteolysis [04120]	NA	NA	NA
vun-miR319f-3p	XM_028072893.1	5	-1	1	20	146	165	UUGGACUGAAGGGGCCUCUU	UAAAGGAUCAUUCAGUUUAA	Translation	PREDICTED: Vigna unguiculata probable ubiquitin-conjugating enzyme E2 25 (LOC114185266), mRNA	2	Ubiquitin-conjugating enzyme E2 O	DEO72_LG10g1160	Ubiquitin system [04121]; Ubiquitin mediated proteolysis [04120]	NA	NA	NA
vun-miR319f-3p	XM_028073136.1	5	-1	1	20	2015	2034	UUGGACUGAAGGGGCCUCUU	AAGGGGCUUAUUUGGUCUAG	Translation	PREDICTED: Vigna unguiculata receptor-like protein CLAVATA2 (LOC114185423), mRNA	1	LRR receptor-like serine/threonine-protein kinase FLS2	DEO72_LG10g3738	NA	GO:0016301~kinase activity	NA	GO:0016021~integral component of membrane
vun-miR319f-3p	XM_028073370.1	2.5	-1	1	20	1355	1374	UUGGACUGAAGGGGCCUCUU	AGGGGGACCCUUCAGUCCAG	Cleavage	PREDICTED: Vigna unguiculata transcription factor TCP4-like (LOC114185560), transcript variant X1, mRNA	1	Transcription factor TCP subgroup	DEO72_LG10g950	NA	GO:0003700~sequence-specific DNA binding transcription factor activity	NA	NA
vun-miR319f-3p	XM_028073371.1	2.5	-1	1	20	1182	1201	UUGGACUGAAGGGGCCUCUU	AGGGGGACCCUUCAGUCCAG	Cleavage	PREDICTED: Vigna unguiculata transcription factor TCP4-like (LOC114185560), transcript variant X2, mRNA	1	Transcription factor TCP subgroup	DEO72_LG10g950	NA	GO:0003700~sequence-specific DNA binding transcription factor activity	NA	NA
vun-miR319f-3p	XM_028073372.1	2.5	-1	1	20	1715	1734	UUGGACUGAAGGGGCCUCUU	AGGGGGACCCUUCAGUCCAG	Cleavage	PREDICTED: Vigna unguiculata transcription factor TCP4-like (LOC114185560), transcript variant X3, mRNA	1	Transcription factor TCP subgroup	DEO72_LG10g950	NA	GO:0003700~sequence-specific DNA binding transcription factor activity	NA	NA
vun-miR319f-3p	XM_028073373.1	2.5	-1	1	20	1391	1410	UUGGACUGAAGGGGCCUCUU	AGGGGGACCCUUCAGUCCAG	Cleavage	PREDICTED: Vigna unguiculata transcription factor TCP4-like (LOC114185560), transcript variant X4, mRNA	1	Transcription factor TCP subgroup	DEO72_LG10g950	NA	GO:0003700~sequence-specific DNA binding transcription factor activity	NA	NA
vun-miR319f-3p	XM_028073678.1	4	-1	1	20	167	186	UUGGACUGAAGGGGCCUCUU	AAGGGGUUUCUUCAGUUCCA	Cleavage	PREDICTED: Vigna unguiculata uncharacterized LOC114185772 (LOC114185772), transcript variant X1, mRNA	1	Uncharacterized protein	DEO72_LG10g4007	NA	NA	NA	NA
vun-miR319f-3p	XM_028073680.1	4	-1	1	20	166	185	UUGGACUGAAGGGGCCUCUU	AAGGGGUUUCUUCAGUUCCA	Cleavage	PREDICTED: Vigna unguiculata uncharacterized LOC114185772 (LOC114185772), transcript variant X2, mRNA	1	Uncharacterized protein	DEO72_LG10g4007	NA	NA	NA	NA
vun-miR319f-3p	XM_028073909.1	3	-1	1	20	227	246	UUGGACUGAAGGGGCCUCUU	AAGCGACCCCUUCAGUUCGA	Cleavage	PREDICTED: Vigna unguiculata peptidyl-prolyl cis-trans isomerase CYP71 (LOC114185941), transcript variant X1, mRNA	1	Putative peptidyl-prolyl cis-trans isomerase and WD40 repeat domain family protein	100383118 ZEAMMB73_Zm00001d049958	Chaperones and folding catalysts [03110]; Spliceosome [03041]	GO:0003682~chromatin binding;GO:0003755~peptidyl-prolyl cis-trans isomerase activity;GO:0042393~histone binding	GO:0000413~protein peptidyl-prolyl isomerization;GO:0006457~protein folding;GO:0009909~regulation of flower development;GO:0009933~meristem structural organization;GO:0010082~regulation of root meristem growth;GO:0010305~leaf vascular tissue pattern formation;GO:0010338~leaf formation;GO:0010358~leaf shaping;GO:0031060~regulation of histone methylation;GO:0048440~carpel development;GO:0048443~sta…	GO:0005634~nucleus
vun-miR319f-3p	XM_028073910.1	3	-1	1	20	218	237	UUGGACUGAAGGGGCCUCUU	AAGCGACCCCUUCAGUUCGA	Cleavage	PREDICTED: Vigna unguiculata peptidyl-prolyl cis-trans isomerase CYP71 (LOC114185941), transcript variant X3, mRNA	1	Putative peptidyl-prolyl cis-trans isomerase and WD40 repeat domain family protein	100383118 ZEAMMB73_Zm00001d049958	Chaperones and folding catalysts [03110]; Spliceosome [03041]	GO:0003682~chromatin binding;GO:0003755~peptidyl-prolyl cis-trans isomerase activity;GO:0042393~histone binding	GO:0000413~protein peptidyl-prolyl isomerization;GO:0006457~protein folding;GO:0009909~regulation of flower development;GO:0009933~meristem structural organization;GO:0010082~regulation of root meristem growth;GO:0010305~leaf vascular tissue pattern formation;GO:0010338~leaf formation;GO:0010358~leaf shaping;GO:0031060~regulation of histone methylation;GO:0048440~carpel development;GO:0048443~sta…	GO:0005634~nucleus
vun-miR319f-3p	XM_028073995.1	4.5	-1	1	20	427	446	UUGGACUGAAGGGGCCUCUU	GAGAGGCCCGUUCAUUCCGU	Translation	PREDICTED: Vigna unguiculata reticulon-like protein B5 (LOC114186004), mRNA	1	Reticulon-like protein	NA	NA	NA	NA	GO:0005789~endoplasmic reticulum membrane;GO:0016021~integral component of membrane
vun-miR319f-3p	XM_028073997.1	4	-1	1	20	822	841	UUGGACUGAAGGGGCCUCUU	GAGAGGUCCUUUUGGGCUAA	Cleavage	PREDICTED: Vigna unguiculata ER membrane protein complex subunit 10 (LOC114186006), mRNA	1	Uncharacterized protein	LR48_Vigan03g038500	Membrane trafficking [04131]	NA	NA	GO:0005774~vacuolar membrane;GO:0005783~endoplasmic reticulum
vun-miR319f-3p	XM_028074831.1	3.5	-1	1	20	1642	1661	UUGGACUGAAGGGGCCUCUU	UGGAGCUCCCUUCACUCCAA	Cleavage	PREDICTED: Vigna unguiculata transcription factor MYB33-like (LOC114186807), transcript variant X1, mRNA	1	Myb proto-oncogene protein	DEO72_LG1g2914	Transcription factors [03000]	GO:0003677~DNA binding	NA	GO:0005634~nucleus
vun-miR319f-3p	XM_028074832.1	3.5	-1	1	20	1552	1571	UUGGACUGAAGGGGCCUCUU	UGGAGCUCCCUUCACUCCAA	Cleavage	PREDICTED: Vigna unguiculata transcription factor MYB33-like (LOC114186807), transcript variant X2, mRNA	1	Myb proto-oncogene protein	DEO72_LG1g2914	Transcription factors [03000]	GO:0003677~DNA binding	NA	GO:0005634~nucleus
vun-miR319f-3p	XM_028074833.1	3.5	-1	1	20	1611	1630	UUGGACUGAAGGGGCCUCUU	UGGAGCUCCCUUCACUCCAA	Cleavage	PREDICTED: Vigna unguiculata transcription factor MYB33-like (LOC114186807), transcript variant X3, mRNA	1	Myb proto-oncogene protein	DEO72_LG1g2914	Transcription factors [03000]	GO:0003677~DNA binding	NA	GO:0005634~nucleus
vun-miR319f-3p	XM_028074834.1	3.5	-1	1	20	1566	1585	UUGGACUGAAGGGGCCUCUU	UGGAGCUCCCUUCACUCCAA	Cleavage	PREDICTED: Vigna unguiculata transcription factor MYB33-like (LOC114186807), transcript variant X4, mRNA	1	Myb proto-oncogene protein	DEO72_LG1g2914	Transcription factors [03000]	GO:0003677~DNA binding	NA	GO:0005634~nucleus
vun-miR319f-3p	XM_028074835.1	3.5	-1	1	20	1535	1554	UUGGACUGAAGGGGCCUCUU	UGGAGCUCCCUUCACUCCAA	Cleavage	PREDICTED: Vigna unguiculata transcription factor MYB33-like (LOC114186807), transcript variant X5, mRNA	1	Myb proto-oncogene protein	DEO72_LG1g2914	Transcription factors [03000]	GO:0003677~DNA binding	NA	GO:0005634~nucleus
vun-miR319f-3p	XM_028074908.1	5	-1	1	20	234	256	UUGGACUGAAGGGG---CCUCUU	AAGAGGUAACCCCCUCGGUCCAA	Translation	PREDICTED: Vigna unguiculata uncharacterized LOC114186865 (LOC114186865), mRNA	1	Transpos_assoc domain-containing protein	Ahy_B04g070791	NA	NA	NA	NA
vun-miR319f-3p	XM_028075232.1	4.5	-1	1	20	1949	1968	UUGGACUGAAGGGGCCUCUU	AAGGGUCUUCUUCACUUCAA	Cleavage	PREDICTED: Vigna unguiculata cold-responsive protein kinase 1-like (LOC114187100), mRNA	1	cysteine-rich receptor-like protein kinase 2	LOC106775622	NA	GO:0004672~protein kinase activity;GO:0005524~ATP binding	NA	GO:0016021~integral component of membrane
vun-miR319f-3p	XM_028075382.1	4	-1	1	20	2383	2402	UUGGACUGAAGGGGCCUCUU	GAGAGGAUCUUUCAGCCCAG	Cleavage	PREDICTED: Vigna unguiculata boron transporter 1-like (LOC114187203), transcript variant X1, mRNA	2	Elongation factor G	DEO72_LG1g1060	NA	GO:0003746~translation elongation factor activity;GO:0005452~inorganic anion exchanger activity	NA	GO:0016021~integral component of membrane
vun-miR319f-3p	XM_028075382.1	4.5	-1	1	20	1106	1125	UUGGACUGAAGGGGCCUCUU	UAGGCGUCUUUUCAGCCCAA	Cleavage	PREDICTED: Vigna unguiculata boron transporter 1-like (LOC114187203), transcript variant X1, mRNA	2	Elongation factor G	DEO72_LG1g1060	NA	GO:0003746~translation elongation factor activity;GO:0005452~inorganic anion exchanger activity	NA	GO:0016021~integral component of membrane
vun-miR319f-3p	XM_028075383.1	4	-1	1	20	2618	2637	UUGGACUGAAGGGGCCUCUU	GAGAGGAUCUUUCAGCCCAG	Cleavage	PREDICTED: Vigna unguiculata boron transporter 1-like (LOC114187203), transcript variant X2, mRNA	2	Elongation factor G	DEO72_LG1g1060	NA	GO:0003746~translation elongation factor activity;GO:0005452~inorganic anion exchanger activity	NA	GO:0016021~integral component of membrane
vun-miR319f-3p	XM_028075383.1	4.5	-1	1	20	1341	1360	UUGGACUGAAGGGGCCUCUU	UAGGCGUCUUUUCAGCCCAA	Cleavage	PREDICTED: Vigna unguiculata boron transporter 1-like (LOC114187203), transcript variant X2, mRNA	2	Elongation factor G	DEO72_LG1g1060	NA	GO:0003746~translation elongation factor activity;GO:0005452~inorganic anion exchanger activity	NA	GO:0016021~integral component of membrane
vun-miR319f-3p	XM_028075543.1	4.5	-1	1	20	3563	3582	UUGGACUGAAGGGGCCUCUU	UUGGGGCCUCUUUAGUUUGG	Cleavage	PREDICTED: Vigna unguiculata mediator of RNA polymerase II transcription subunit 33A (LOC114187322), mRNA	1	Uncharacterized protein	DEO72_LG1g731	NA	NA	GO:2000762~regulation of phenylpropanoid metabolic process	GO:0016021~integral component of membrane;GO:0016592~mediator complex
vun-miR319f-3p	XM_028075553.1	2	-1	1	20	2295	2314	UUGGACUGAAGGGGCCUCUU	AGGGGGACCCUUCAGUCCAA	Cleavage	PREDICTED: Vigna unguiculata transcription factor TCP2 (LOC114187334), transcript variant X1, mRNA	1	Transcription factor	DEO72_LG1g585	NA	GO:0003700~sequence-specific DNA binding transcription factor activity	NA	NA
vun-miR319f-3p	XM_028075554.1	2	-1	1	20	2264	2283	UUGGACUGAAGGGGCCUCUU	AGGGGGACCCUUCAGUCCAA	Cleavage	PREDICTED: Vigna unguiculata transcription factor TCP2 (LOC114187334), transcript variant X2, mRNA	1	Transcription factor	DEO72_LG1g585	NA	GO:0003700~sequence-specific DNA binding transcription factor activity	NA	NA
vun-miR319f-3p	XM_028075555.1	2	-1	1	20	2161	2180	UUGGACUGAAGGGGCCUCUU	AGGGGGACCCUUCAGUCCAA	Cleavage	PREDICTED: Vigna unguiculata transcription factor TCP2 (LOC114187334), transcript variant X3, mRNA	1	Transcription factor	DEO72_LG1g585	NA	GO:0003700~sequence-specific DNA binding transcription factor activity	NA	NA
vun-miR319f-3p	XM_028075556.1	2	-1	1	20	2094	2113	UUGGACUGAAGGGGCCUCUU	AGGGGGACCCUUCAGUCCAA	Cleavage	PREDICTED: Vigna unguiculata transcription factor TCP2 (LOC114187334), transcript variant X4, mRNA	1	Transcription factor	DEO72_LG1g585	NA	GO:0003700~sequence-specific DNA binding transcription factor activity	NA	NA
vun-miR319f-3p	XM_028075557.1	2	-1	1	20	2259	2278	UUGGACUGAAGGGGCCUCUU	AGGGGGACCCUUCAGUCCAA	Cleavage	PREDICTED: Vigna unguiculata transcription factor TCP2 (LOC114187334), transcript variant X5, mRNA	1	Transcription factor	DEO72_LG1g585	NA	GO:0003700~sequence-specific DNA binding transcription factor activity	NA	NA
vun-miR319f-3p	XM_028075558.1	2	-1	1	20	2259	2278	UUGGACUGAAGGGGCCUCUU	AGGGGGACCCUUCAGUCCAA	Cleavage	PREDICTED: Vigna unguiculata transcription factor TCP2 (LOC114187334), transcript variant X6, mRNA	1	Transcription factor	DEO72_LG1g585	NA	GO:0003700~sequence-specific DNA binding transcription factor activity	NA	NA
vun-miR319f-3p	XM_028076302.1	5	-1	1	20	1717	1736	UUGGACUGAAGGGGCCUCUU	AGGAGGCCACUUGAGUUUGA	Cleavage	PREDICTED: Vigna unguiculata uncharacterized LOC114187895 (LOC114187895), mRNA	1	Retrotransposable element Tf2 (Fragment)	KK1_049625	NA	GO:0003676~nucleic acid binding	GO:0015074~DNA integration	NA
vun-miR319f-3p	XM_028076814.1	4	-1	1	20	1809	1828	UUGGACUGAAGGGGCCUCUU	GACAGGCUUCGUCAGUCCAG	Translation	PREDICTED: Vigna unguiculata bromodomain testis-specific protein (LOC114188244), mRNA	1	Bromo domain-containing protein	DEO72_LG1g18	NA	NA	NA	NA
vun-miR319f-3p	XM_028077376.1	4.5	-1	1	20	801	820	UUGGACUGAAGGGGCCUCUU	AAGGGUCUCCUUCACUCUGA	Cleavage	PREDICTED: Vigna unguiculata peroxidase P7-like (LOC114188742), mRNA	1	Peroxidase (EC 1.11.1.7)	LOC106752471	Phenylpropanoid biosynthesis [00940]	GO:0004601~peroxidase activity;GO:0020037~heme binding;GO:0046872~metal ion binding	GO:0006979~response to oxidative stress;GO:0042744~hydrogen peroxide catabolic process	GO:0005576~extracellular region
vun-miR319f-3p	XM_028077422.1	3.5	-1	1	20	310	329	UUGGACUGAAGGGGCCUCUU	AAGAAGACCCUUCAGUGCAA	Cleavage	PREDICTED: Vigna unguiculata uncharacterized LOC114188783 (LOC114188783), mRNA	1	PolyADP-ribose polymerase	DEO72_LG1g272	NA	GO:0003676~nucleic acid binding	NA	NA
vun-miR319f-3p	XM_028077596.1	5	-1	1	20	872	891	UUGGACUGAAGGGGCCUCUU	AAGAGUCCUCUUCAUUUCGC	Cleavage	PREDICTED: Vigna unguiculata uncharacterized LOC114188925 (LOC114188925), mRNA	1	Uncharacterized protein	DEO72_LG1g1806	NA	NA	NA	NA
vun-miR319f-3p	XM_028077688.1	4	-1	1	20	1059	1078	UUGGACUGAAGGGGCCUCUU	UAGAGGCUCCUUUAGAACAA	Cleavage	PREDICTED: Vigna unguiculata uncharacterized LOC114188993 (LOC114188993), mRNA	1	Protein transport protein SEC20	DEO72_LG1g905	Membrane trafficking [04131]; SNARE interactions in vesicular transport [04130]	GO:0005484~SNAP receptor activity	GO:0006890~retrograde vesicle-mediated transport, Golgi to ER	GO:0016021~integral component of membrane
vun-miR319f-3p	XM_028078142.1	4.5	-1	1	20	276	295	UUGGACUGAAGGGGCCUCUU	AAGGGGUUUCUUCAGCCUAG	Cleavage	PREDICTED: Vigna unguiculata solute carrier family 40 member 3, chloroplastic (LOC114189549), mRNA	1	Solute carrier family 40 protein	LOC106769709	NA	GO:0005381~iron ion transmembrane transporter activity	NA	GO:0016021~integral component of membrane
vun-miR319f-3p	XM_028078143.1	5	-1	1	20	1950	1969	UUGGACUGAAGGGGCCUCUU	CAGAGGCCGUUUCAGUUCCU	Cleavage	PREDICTED: Vigna unguiculata clathrin interactor EPSIN 2 (LOC114189550), transcript variant X1, mRNA	1	Epsin	DEO72_LG9g682	Membrane trafficking [04131]; Endocytosis [04144]	NA	NA	NA
vun-miR319f-3p	XM_028078145.1	5	-1	1	20	1760	1779	UUGGACUGAAGGGGCCUCUU	CAGAGGCCGUUUCAGUUCCU	Cleavage	PREDICTED: Vigna unguiculata clathrin interactor EPSIN 2 (LOC114189550), transcript variant X2, mRNA	1	Epsin	DEO72_LG9g682	Membrane trafficking [04131]; Endocytosis [04144]	NA	NA	NA
vun-miR319f-3p	XM_028078146.1	5	-1	1	20	1703	1722	UUGGACUGAAGGGGCCUCUU	CAGAGGCCGUUUCAGUUCCU	Cleavage	PREDICTED: Vigna unguiculata clathrin interactor EPSIN 2 (LOC114189550), transcript variant X3, mRNA	1	Epsin	DEO72_LG9g682	Membrane trafficking [04131]; Endocytosis [04144]	NA	NA	NA
vun-miR319f-3p	XM_028078376.1	4	-1	1	20	942	961	UUGGACUGAAGGGGCCUCUU	GGGGAGCCUCCUCAGUCCAA	Translation	PREDICTED: Vigna unguiculata uncharacterized LOC114189717 (LOC114189717), mRNA	1	Uncharacterized protein	DEO72_LG9g2585	NA	NA	NA	NA
vun-miR319f-3p	XM_028078395.1	4.5	-1	1	20	2295	2314	UUGGACUGAAGGGGCCUCUU	AUAAGGCCCCUUCGAUCCGA	Cleavage	PREDICTED: Vigna unguiculata uncharacterized LOC114189731 (LOC114189731), mRNA	1	Polyhydroxyalkanoate synthase	DEO72_LG9g3607	NA	GO:0004252~serine-type endopeptidase activity	NA	NA
vun-miR319f-3p	XM_028078424.1	4.5	-1	1	20	648	667	UUGGACUGAAGGGGCCUCUU	AAGUGGUCUCUUUUGUUCAA	Cleavage	PREDICTED: Vigna unguiculata homogentisate solanesyltransferase, chloroplastic (LOC114189752), mRNA	1	Digeranylgeranylglyceryl phosphate synthase	F775_07925	Prenyltransferases [01006]; Ubiquinone and other terpenoid-quinone biosynthesis [00130]	GO:0016765~transferase activity, transferring alkyl or aryl (other than methyl) groups	NA	GO:0016021~integral component of membrane
vun-miR319f-3p	XM_028078751.1	3.5	-1	1	20	1048	1067	UUGGACUGAAGGGGCCUCUU	AGGAUGCCUCUUCAGUCAAA	Cleavage	PREDICTED: Vigna unguiculata glutathione S-transferase L3-like (LOC114190013), transcript variant X1, mRNA	1	Glutathione S-transferase	DEO72_LG9g2002	Transporters [02000]; Glutathione metabolism [00480]	GO:0016740~transferase activity	NA	NA
vun-miR319f-3p	XM_028078752.1	3.5	-1	1	20	1076	1095	UUGGACUGAAGGGGCCUCUU	AGGAUGCCUCUUCAGUCAAA	Cleavage	PREDICTED: Vigna unguiculata glutathione S-transferase L3-like (LOC114190013), transcript variant X2, mRNA	1	Glutathione S-transferase	DEO72_LG9g2002	Transporters [02000]; Glutathione metabolism [00480]	GO:0016740~transferase activity	NA	NA
vun-miR319f-3p	XM_028078753.1	3.5	-1	1	20	967	986	UUGGACUGAAGGGGCCUCUU	AGGAUGCCUCUUCAGUCAAA	Cleavage	PREDICTED: Vigna unguiculata glutathione S-transferase L3-like (LOC114190013), transcript variant X3, mRNA	1	Glutathione S-transferase	DEO72_LG9g2002	Transporters [02000]; Glutathione metabolism [00480]	GO:0016740~transferase activity	NA	NA
vun-miR319f-3p	XM_028078754.1	3.5	-1	1	20	995	1014	UUGGACUGAAGGGGCCUCUU	AGGAUGCCUCUUCAGUCAAA	Cleavage	PREDICTED: Vigna unguiculata glutathione S-transferase L3-like (LOC114190013), transcript variant X4, mRNA	1	Glutathione S-transferase	DEO72_LG9g2002	Transporters [02000]; Glutathione metabolism [00480]	GO:0016740~transferase activity	NA	NA
vun-miR319f-3p	XM_028078919.1	4.5	-1	1	20	491	510	UUGGACUGAAGGGGCCUCUU	UGGGGGCCUAUUCAGUACAA	Translation	PREDICTED: Vigna unguiculata single-stranded DNA-binding protein, mitochondrial (LOC114190138), transcript variant X1, mRNA	1	Single-strand DNA-binding protein	DEO72_LG9g2310	NA	GO:0003697~single-stranded DNA binding	GO:0006260~DNA replication	NA
vun-miR319f-3p	XM_028078920.1	4.5	-1	1	20	491	510	UUGGACUGAAGGGGCCUCUU	UGGGGGCCUAUUCAGUACAA	Translation	PREDICTED: Vigna unguiculata single-stranded DNA-binding protein, mitochondrial (LOC114190138), transcript variant X3, mRNA	1	Single-strand DNA-binding protein	DEO72_LG9g2310	NA	GO:0003697~single-stranded DNA binding	GO:0006260~DNA replication	NA
vun-miR319f-3p	XM_028079704.1	4	-1	1	20	1571	1590	UUGGACUGAAGGGGCCUCUU	GAGAGGGCGUUUUGGUCCAA	Cleavage	PREDICTED: Vigna unguiculata putative G3BP-like protein (LOC114190721), transcript variant X1, mRNA	1	Uncharacterized protein	DEO72_LG9g2713	NA	GO:0003723~RNA binding	NA	NA
vun-miR319f-3p	XM_028079705.1	4	-1	1	20	1565	1584	UUGGACUGAAGGGGCCUCUU	GAGAGGGCGUUUUGGUCCAA	Cleavage	PREDICTED: Vigna unguiculata putative G3BP-like protein (LOC114190721), transcript variant X2, mRNA	1	Uncharacterized protein	DEO72_LG9g2713	NA	GO:0003723~RNA binding	NA	NA
vun-miR319f-3p	XM_028079706.1	4	-1	1	20	1566	1585	UUGGACUGAAGGGGCCUCUU	GAGAGGGCGUUUUGGUCCAA	Cleavage	PREDICTED: Vigna unguiculata putative G3BP-like protein (LOC114190721), transcript variant X3, mRNA	1	Uncharacterized protein	DEO72_LG9g2713	NA	GO:0003723~RNA binding	NA	NA
vun-miR319f-3p	XM_028079707.1	4	-1	1	20	1559	1578	UUGGACUGAAGGGGCCUCUU	GAGAGGGCGUUUUGGUCCAA	Cleavage	PREDICTED: Vigna unguiculata putative G3BP-like protein (LOC114190721), transcript variant X4, mRNA	1	Uncharacterized protein	DEO72_LG9g2713	NA	GO:0003723~RNA binding	NA	NA
vun-miR319f-3p	XM_028079708.1	4	-1	1	20	1229	1248	UUGGACUGAAGGGGCCUCUU	GAGAGGGCGUUUUGGUCCAA	Cleavage	PREDICTED: Vigna unguiculata putative G3BP-like protein (LOC114190721), transcript variant X5, mRNA	1	Uncharacterized protein	DEO72_LG9g2713	NA	GO:0003723~RNA binding	NA	NA
vun-miR319f-3p	XM_028080917.1	2.5	-1	1	20	2101	2120	UUGGACUGAAGGGGCCUCUU	AAGGGGUCCCCUCAGUCCAA	Translation	PREDICTED: Vigna unguiculata boron transporter 1-like (LOC114191619), mRNA	2	Putative boron transporter 2	glysoja_028551	NA	GO:0005452~inorganic anion exchanger activity	NA	GO:0016021~integral component of membrane
vun-miR319f-3p	XM_028080917.1	4.5	-1	1	20	814	833	UUGGACUGAAGGGGCCUCUU	AAGGCGCCUUUUCAGCCCGA	Cleavage	PREDICTED: Vigna unguiculata boron transporter 1-like (LOC114191619), mRNA	2	Putative boron transporter 2	glysoja_028551	NA	GO:0005452~inorganic anion exchanger activity	NA	GO:0016021~integral component of membrane
vun-miR319f-3p	XM_028081150.1	5	-1	1	20	1058	1077	UUGGACUGAAGGGGCCUCUU	AAGGGGCUUUUGCAUUCCAA	Cleavage	PREDICTED: Vigna unguiculata protein LONGIFOLIA 1 (LOC114191769), mRNA	1	DUF4378 domain-containing protein	DEO72_LG9g1279	NA	NA	GO:0051513~regulation of monopolar cell growth	NA
vun-miR319f-3p	XM_028082423.1	2.5	-1	1	20	1361	1380	UUGGACUGAAGGGGCCUCUU	UGGAGGCUUCUUCAGUCUAG	Cleavage	PREDICTED: Vigna unguiculata purine-uracil permease NCS1 (LOC114192645), mRNA	1	Nucleobase:cation symporter-1	DEO72_LG9g878	Transport[99977]	GO:0022857~transmembrane transporter activity	NA	GO:0016021~integral component of membrane
vun-miR319f-3p	XM_028082881.1	5	-1	1	20	1067	1086	UUGGACUGAAGGGGCCUCUU	AAGAGGCCUUUCUAUUUCAA	Cleavage	PREDICTED: Vigna unguiculata U3 small nucleolar RNA-associated protein 25-like (LOC114193170), transcript variant X1, mRNA	1	U3 small nucleolar RNA-associated protein 25	DEO72_LG7g2226	Ribosome biogenesis [03009]	NA	NA	GO:0005634~nucleus
vun-miR319f-3p	XM_028082882.1	5	-1	1	20	1067	1086	UUGGACUGAAGGGGCCUCUU	AAGAGGCCUUUCUAUUUCAA	Cleavage	PREDICTED: Vigna unguiculata U3 small nucleolar RNA-associated protein 25-like (LOC114193170), transcript variant X2, mRNA	1	U3 small nucleolar RNA-associated protein 25	DEO72_LG7g2226	Ribosome biogenesis [03009]	NA	NA	GO:0005634~nucleus
vun-miR319f-3p	XM_028083065.1	3.5	-1	1	20	1139	1158	UUGGACUGAAGGGGCCUCUU	AAGAAGCCCCUUGAGUCCAU	Cleavage	PREDICTED: Vigna unguiculata protein NDL1-like (LOC114193325), transcript variant X1, mRNA	1	Uncharacterized protein	TEA_025990	NA	NA	NA	GO:0016021~integral component of membrane
vun-miR319f-3p	XM_028083066.1	3.5	-1	1	20	1016	1035	UUGGACUGAAGGGGCCUCUU	AAGAAGCCCCUUGAGUCCAU	Cleavage	PREDICTED: Vigna unguiculata protein NDL1-like (LOC114193325), transcript variant X2, mRNA	1	Uncharacterized protein	TEA_025990	NA	NA	NA	GO:0016021~integral component of membrane
vun-miR319f-3p	XM_028083386.1	4.5	-1	1	20	815	834	UUGGACUGAAGGGGCCUCUU	CCUAGGCCUCUUCAGUUGAA	Cleavage	PREDICTED: Vigna unguiculata uncharacterized protein At1g76070 (LOC114193546), mRNA	1	Uncharacterized protein	DEO72_LG7g28	NA	NA	NA	NA
vun-miR319f-3p	XM_028083721.1	3	-1	1	20	1436	1455	UUGGACUGAAGGGGCCUCUU	CAGAGCUCCCUUCACUCCAA	Cleavage	PREDICTED: Vigna unguiculata transcription factor MYB33-like (LOC114193783), transcript variant X1, mRNA	1	Myb proto-oncogene protein	DEO72_LG6g167	Transcription factors [03000]	GO:0003677~DNA binding	NA	GO:0005634~nucleus
vun-miR319f-3p	XM_028083729.1	3	-1	1	20	1213	1232	UUGGACUGAAGGGGCCUCUU	CAGAGCUCCCUUCACUCCAA	Cleavage	PREDICTED: Vigna unguiculata transcription factor MYB33-like (LOC114193783), transcript variant X2, mRNA	1	Myb proto-oncogene protein	DEO72_LG6g167	Transcription factors [03000]	GO:0003677~DNA binding	NA	GO:0005634~nucleus
vun-miR319f-3p	XM_028083737.1	3	-1	1	20	1332	1351	UUGGACUGAAGGGGCCUCUU	CAGAGCUCCCUUCACUCCAA	Cleavage	PREDICTED: Vigna unguiculata transcription factor MYB33-like (LOC114193783), transcript variant X3, mRNA	1	Myb proto-oncogene protein	DEO72_LG6g167	Transcription factors [03000]	GO:0003677~DNA binding	NA	GO:0005634~nucleus
vun-miR319f-3p	XM_028083744.1	3	-1	1	20	1109	1128	UUGGACUGAAGGGGCCUCUU	CAGAGCUCCCUUCACUCCAA	Cleavage	PREDICTED: Vigna unguiculata transcription factor MYB33-like (LOC114193783), transcript variant X4, mRNA	1	Myb proto-oncogene protein	DEO72_LG6g167	Transcription factors [03000]	GO:0003677~DNA binding	NA	GO:0005634~nucleus
vun-miR319f-3p	XM_028083752.1	3	-1	1	20	1078	1097	UUGGACUGAAGGGGCCUCUU	CAGAGCUCCCUUCACUCCAA	Cleavage	PREDICTED: Vigna unguiculata transcription factor MYB33-like (LOC114193783), transcript variant X5, mRNA	1	Myb proto-oncogene protein	DEO72_LG6g167	Transcription factors [03000]	GO:0003677~DNA binding	NA	GO:0005634~nucleus
vun-miR319f-3p	XM_028083760.1	3	-1	1	20	1436	1455	UUGGACUGAAGGGGCCUCUU	CAGAGCUCCCUUCACUCCAA	Cleavage	PREDICTED: Vigna unguiculata transcription factor MYB33-like (LOC114193783), transcript variant X6, mRNA	1	Myb proto-oncogene protein	DEO72_LG6g167	Transcription factors [03000]	GO:0003677~DNA binding	NA	GO:0005634~nucleus
vun-miR319f-3p	XM_028084010.1	4.5	-1	1	20	492	511	UUGGACUGAAGGGGCCUCUU	AAGGGGUGUCUUUGGUCCAG	Cleavage	PREDICTED: Vigna unguiculata uncharacterized vacuolar membrane protein YML018C-like (LOC114193992), mRNA	1	EamA domain-containing protein	DEO72_LG7g516	Transporters [02000]	NA	NA	GO:0016021~integral component of membrane
vun-miR319f-3p	XM_028084317.1	4.5	-1	1	20	2860	2879	UUGGACUGAAGGGGCCUCUU	ACGAGGCUCUUUUAAUUCAA	Cleavage	PREDICTED: Vigna unguiculata carbon catabolite repressor protein 4 homolog 6 (LOC114194208), transcript variant X1, mRNA	1	CCR4-NOT transcription complex subunit 6	DEO72_LG7g698	NA	NA	NA	NA
vun-miR319f-3p	XM_028084318.1	4.5	-1	1	20	2784	2803	UUGGACUGAAGGGGCCUCUU	ACGAGGCUCUUUUAAUUCAA	Cleavage	PREDICTED: Vigna unguiculata carbon catabolite repressor protein 4 homolog 6 (LOC114194208), transcript variant X2, mRNA	1	CCR4-NOT transcription complex subunit 6	DEO72_LG7g698	NA	NA	NA	NA
vun-miR319f-3p	XM_028084510.1	4.5	-1	1	20	788	807	UUGGACUGAAGGGGCCUCUU	AAGGGGCCUUUUCAGUGUAC	Cleavage	PREDICTED: Vigna unguiculata U1 small nuclear ribonucleoprotein A (LOC114194348), mRNA	1	U1 small nuclear ribonucleoprotein A	DEO72_LG7g2260	NA	GO:0003723~RNA binding	NA	NA
vun-miR319f-3p	XM_028085112.1	4.5	-1	1	20	319	338	UUGGACUGAAGGGGCCUCUU	AAGAUGCUUCUUCAGUUAGA	Cleavage	PREDICTED: Vigna unguiculata 65-kDa microtubule-associated protein 1 (LOC114194735), mRNA	1	Microtubule-associated protein	DEO72_LG7g3068	Cytoskeleton proteins [04812]; Chromosome and associated proteins [03036]	GO:0008017~microtubule binding	GO:0000226~microtubule cytoskeleton organization	NA
vun-miR319f-3p	XM_028085199.1	5	-1	1	20	3505	3524	UUGGACUGAAGGGGCCUCUU	AGGAGGCCGCUUGAGUUUGA	Cleavage	PREDICTED: Vigna unguiculata uncharacterized LOC114194783 (LOC114194783), mRNA	1	Uncharacterized protein	TSUD_411620	NA	GO:0003676~nucleic acid binding;GO:0004190~aspartic-type endopeptidase activity;GO:0008270~zinc ion binding	GO:0015074~DNA integration	NA
vun-miR319f-3p	XM_028085388.1	4.5	-1	1	20	1086	1105	UUGGACUGAAGGGGCCUCUU	AGGAGGCUCCUUCGGAUCAU	Cleavage	PREDICTED: Vigna unguiculata pathogenesis-related genes transcriptional activator PTI6-like (LOC114194990), mRNA	2	EREBP-like factor	DEO72_LG7g2372	Transcription factors [03000]; Plant-pathogen interaction [04626]	GO:0003677~DNA binding;GO:0003700~sequence-specific DNA binding transcription factor activity	NA	GO:0005634~nucleus
vun-miR319f-3p	XM_028085388.1	5	-1	1	20	246	265	UUGGACUGAAGGGGCCUCUU	AAUACCCCUCUUCAAUCCAA	Cleavage	PREDICTED: Vigna unguiculata pathogenesis-related genes transcriptional activator PTI6-like (LOC114194990), mRNA	2	EREBP-like factor	DEO72_LG7g2372	Transcription factors [03000]; Plant-pathogen interaction [04626]	GO:0003677~DNA binding;GO:0003700~sequence-specific DNA binding transcription factor activity	NA	GO:0005634~nucleus
vun-miR319f-3p	XM_028086269.1	5	-1	1	20	350	369	UUGGACUGAAGGGGCCUCUU	UGAUGGUUUCUUUAGUCCAA	Cleavage	PREDICTED: Vigna unguiculata protein LIKE COV 2 (LOC114195852), transcript variant X2, mRNA	1	Uncharacterized protein	LR48_Vigan11g044600	NA	NA	NA	GO:0016021~integral component of membrane
vun-miR319f-3p	XM_028086324.1	4	-1	1	20	812	831	UUGGACUGAAGGGGCCUCUU	AAGGGGGCCCUCUGGUCCAA	Cleavage	PREDICTED: Vigna unguiculata GATA transcription factor 25-like (LOC114195894), mRNA	1	Pseudo-response regulator 1	DEO72_LG11g2945	NA	GO:0008270~zinc ion binding;GO:0043565~sequence-specific DNA binding	GO:0006355~regulation of transcription, DNA-templated	GO:0005634~nucleus
vun-miR319f-3p	XR_003599218.1	5	-1	1	20	769	790	UUGGACUGAAGGGGC--CUCUU	AAGAGUCGUUCCUUUAGUUCAG	Cleavage	PREDICTED: Vigna unguiculata biotin--protein ligase 2-like (LOC114162520), transcript variant X2, misc_RNA	1	NA	NA	NA	NA	NA	NA
vun-miR319f-3p	XR_003599219.1	5	-1	1	20	769	790	UUGGACUGAAGGGGC--CUCUU	AAGAGUCGUUCCUUUAGUUCAG	Cleavage	PREDICTED: Vigna unguiculata biotin--protein ligase 2-like (LOC114162520), transcript variant X5, misc_RNA	1	NA	NA	NA	NA	NA	NA
vun-miR319f-3p	XR_003601099.1	4.5	-1	1	20	2774	2793	UUGGACUGAAGGGGCCUCUU	AGGUGGCUCCUUUAGUCUGU	Cleavage	PREDICTED: Vigna unguiculata helicase protein MOM1-like (LOC114170579), transcript variant X2, misc_RNA	1	NA	NA	NA	NA	NA	NA
vun-miR319f-3p	XR_003602812.1	3.5	-1	1	20	312	331	UUGGACUGAAGGGGCCUCUU	AAGUGGUCCCUUUAGUCUGG	Cleavage	PREDICTED: Vigna unguiculata uncharacterized LOC114175301 (LOC114175301), ncRNA	1	NA	NA	NA	NA	NA	NA
vun-miR319f-3p	XR_003604283.1	4	-1	1	20	428	447	UUGGACUGAAGGGGCCUCUU	ACGGGGACCCUUUAGUUUAA	Cleavage	PREDICTED: Vigna unguiculata uncharacterized LOC114183034 (LOC114183034), ncRNA	1	NA	NA	NA	NA	NA	NA
vun-miR319f-3p	XR_003604891.1	4	-1	1	20	172	191	UUGGACUGAAGGGGCCUCUU	AAGGGGUUUCUUCAGUUCCA	Cleavage	PREDICTED: Vigna unguiculata uncharacterized LOC114185772 (LOC114185772), transcript variant X3, misc_RNA	1	NA	NA	NA	NA	NA	NA
vun-miR319f-3p	XR_003604937.1	3	-1	1	20	227	246	UUGGACUGAAGGGGCCUCUU	AAGCGACCCCUUCAGUUCGA	Cleavage	PREDICTED: Vigna unguiculata peptidyl-prolyl cis-trans isomerase CYP71 (LOC114185941), transcript variant X2, misc_RNA	1	NA	NA	NA	NA	NA	NA
vun-miR319f-3p	XR_003605265.1	3	-1	1	20	1825	1844	UUGGACUGAAGGGGCCUCUU	GAGAGCUUCCUUCAGUCCAC	Cleavage	PREDICTED: Vigna unguiculata uncharacterized LOC114187485 (LOC114187485), ncRNA	1	NA	NA	NA	NA	NA	NA
vun-miR319f-3p	XR_003605367.1	4.5	-1	1	20	4179	4198	UUGGACUGAAGGGGCCUCUU	UGGAGGCCCAUUCAGCCCAC	Translation	PREDICTED: Vigna unguiculata protein HASTY 1 (LOC114187989), transcript variant X2, misc_RNA	1	NA	NA	NA	NA	NA	NA
vun-miR319f-3p	XR_003605772.1	4.5	-1	1	20	491	510	UUGGACUGAAGGGGCCUCUU	UGGGGGCCUAUUCAGUACAA	Translation	PREDICTED: Vigna unguiculata single-stranded DNA-binding protein, mitochondrial (LOC114190138), transcript variant X2, misc_RNA	1	NA	NA	NA	NA	NA	NA
vun-miR319f-3p	XR_003605841.1	4	-1	1	20	1585	1604	UUGGACUGAAGGGGCCUCUU	GAGAGGGCGUUUUGGUCCAA	Cleavage	PREDICTED: Vigna unguiculata putative G3BP-like protein (LOC114190721), transcript variant X6, misc_RNA	1	NA	NA	NA	NA	NA	NA
vun-miR319f-3p	XR_003605842.1	4	-1	1	20	1577	1596	UUGGACUGAAGGGGCCUCUU	GAGAGGGCGUUUUGGUCCAA	Cleavage	PREDICTED: Vigna unguiculata putative G3BP-like protein (LOC114190721), transcript variant X7, misc_RNA	1	NA	NA	NA	NA	NA	NA
vun-miR398c-3p	XM_028045940.1	4.5	-1	1	21	1189	1209	UGUGUUCUCAGGUCGCCCCUG	UUGGGGUGAUAGGAGAACAUA	Translation	PREDICTED: Vigna unguiculata uncharacterized LOC114162148 (LOC114162148), mRNA	1	Vacuolar protein sorting-associated protein 62	DEO72_LG6g877	NA	NA	NA	NA
vun-miR398c-3p	XM_028046225.1	4.5	-1	1	21	732	752	UGUGUUCUCAGGUCGCCCCUG	GAAAGGUGAUGUGAGAACACA	Translation	PREDICTED: Vigna unguiculata beta-1,2-xylosyltransferase XYXT1 (LOC114162360), mRNA	1	Glycosyltransferase AER61	DEO72_LG6g2109	NA	GO:0016757~transferase activity, transferring glycosyl groups	NA	GO:0016021~integral component of membrane
vun-miR398c-3p	XM_028046650.1	3	-1	1	21	68	88	UGUGUUCUCAGGUCGCCCCUG	CAGGGACGAUCUGAUAACACA	Cleavage	PREDICTED: Vigna unguiculata cucumber peeling cupredoxin-like (LOC114162693), mRNA	1	Cupredoxin	DEO72_LG11g975	NA	GO:0009055~electron carrier activity	NA	NA
vun-miR398c-3p	XM_028046873.1	3.5	-1	1	21	2023	2043	UGUGUUCUCAGGUCGCCCCUG	UACGGUUGAUCUGAGAGCACA	Cleavage	PREDICTED: Vigna unguiculata dipeptidyl aminopeptidase 4 (LOC114162883), transcript variant X1, mRNA	1	Dipeptidyl-peptidase 4	DEO72_LG11g2596	CD molecules [04090]; Exosome [04147]; Peptidases and inhibitors [01002]	GO:0008236~serine-type peptidase activity	NA	NA
vun-miR398c-3p	XM_028046874.1	3.5	-1	1	21	2075	2095	UGUGUUCUCAGGUCGCCCCUG	UACGGUUGAUCUGAGAGCACA	Cleavage	PREDICTED: Vigna unguiculata dipeptidyl aminopeptidase 4 (LOC114162883), transcript variant X2, mRNA	1	Dipeptidyl-peptidase 4	DEO72_LG11g2596	CD molecules [04090]; Exosome [04147]; Peptidases and inhibitors [01002]	GO:0008236~serine-type peptidase activity	NA	NA
vun-miR398c-3p	XM_028046875.1	3.5	-1	1	21	1950	1970	UGUGUUCUCAGGUCGCCCCUG	UACGGUUGAUCUGAGAGCACA	Cleavage	PREDICTED: Vigna unguiculata dipeptidyl aminopeptidase 4 (LOC114162883), transcript variant X3, mRNA	1	Dipeptidyl-peptidase 4	DEO72_LG11g2596	CD molecules [04090]; Exosome [04147]; Peptidases and inhibitors [01002]	GO:0008236~serine-type peptidase activity	NA	NA
vun-miR398c-3p	XM_028046876.1	3.5	-1	1	21	1954	1974	UGUGUUCUCAGGUCGCCCCUG	UACGGUUGAUCUGAGAGCACA	Cleavage	PREDICTED: Vigna unguiculata dipeptidyl aminopeptidase 4 (LOC114162883), transcript variant X4, mRNA	1	Dipeptidyl-peptidase 4	DEO72_LG11g2596	CD molecules [04090]; Exosome [04147]; Peptidases and inhibitors [01002]	GO:0008236~serine-type peptidase activity	NA	NA
vun-miR398c-3p	XM_028046928.1	4	-1	1	21	143	163	UGUGUUCUCAGGUCGCCCCUG	CUGCGGUGGCCUGGGAACCCA	Cleavage	PREDICTED: Vigna unguiculata alcohol dehydrogenase class-3 (LOC114162918), mRNA	1	S-(hydroxymethyl)glutathione dehydrogenase (EC 1.1.1.284)	DEO72_LG6g2512	Tyrosine metabolism [00350]; Fatty acid degradation [00071]; Glycolysis / Gluconeogenesis [00010]	GO:0008270~zinc ion binding;GO:0051903~S-(hydroxymethyl)glutathione dehydrogenase activity	GO:0006069~ethanol oxidation	NA
vun-miR398c-3p	XM_028048228.1	5	-1	1	21	5624	5644	UGUGUUCUCAGGUCGCCCCUG	CAGCAGUUGCCUGAGAAUGCA	Cleavage	PREDICTED: Vigna unguiculata uncharacterized LOC114163864 (LOC114163864), transcript variant X1, mRNA	1	Potassium voltage-gated channel Eag-related subfamily H member 2	DEO72_LG11g3188	DNA repair and recombination proteins [03400]	GO:0005249~voltage-gated potassium channel activity	GO:0034765~regulation of ion transmembrane transport	GO:0016021~integral component of membrane
vun-miR398c-3p	XM_028048229.1	5	-1	1	21	5597	5617	UGUGUUCUCAGGUCGCCCCUG	CAGCAGUUGCCUGAGAAUGCA	Cleavage	PREDICTED: Vigna unguiculata uncharacterized LOC114163864 (LOC114163864), transcript variant X2, mRNA	1	Potassium voltage-gated channel Eag-related subfamily H member 2	DEO72_LG11g3188	DNA repair and recombination proteins [03400]	GO:0005249~voltage-gated potassium channel activity	GO:0034765~regulation of ion transmembrane transport	GO:0016021~integral component of membrane
vun-miR398c-3p	XM_028048230.1	5	-1	1	21	5043	5063	UGUGUUCUCAGGUCGCCCCUG	CAGCAGUUGCCUGAGAAUGCA	Cleavage	PREDICTED: Vigna unguiculata uncharacterized LOC114163864 (LOC114163864), transcript variant X3, mRNA	1	Potassium voltage-gated channel Eag-related subfamily H member 2	DEO72_LG11g3188	DNA repair and recombination proteins [03400]	GO:0005249~voltage-gated potassium channel activity	GO:0034765~regulation of ion transmembrane transport	GO:0016021~integral component of membrane
vun-miR398c-3p	XM_028048231.1	5	-1	1	21	4259	4279	UGUGUUCUCAGGUCGCCCCUG	CAGCAGUUGCCUGAGAAUGCA	Cleavage	PREDICTED: Vigna unguiculata uncharacterized LOC114163864 (LOC114163864), transcript variant X4, mRNA	1	Potassium voltage-gated channel Eag-related subfamily H member 2	DEO72_LG11g3188	DNA repair and recombination proteins [03400]	GO:0005249~voltage-gated potassium channel activity	GO:0034765~regulation of ion transmembrane transport	GO:0016021~integral component of membrane
vun-miR398c-3p	XM_028048232.1	5	-1	1	21	4217	4237	UGUGUUCUCAGGUCGCCCCUG	CAGCAGUUGCCUGAGAAUGCA	Cleavage	PREDICTED: Vigna unguiculata uncharacterized LOC114163864 (LOC114163864), transcript variant X5, mRNA	1	Potassium voltage-gated channel Eag-related subfamily H member 2	DEO72_LG11g3188	DNA repair and recombination proteins [03400]	GO:0005249~voltage-gated potassium channel activity	GO:0034765~regulation of ion transmembrane transport	GO:0016021~integral component of membrane
vun-miR398c-3p	XM_028049411.1	3.5	-1	1	21	567	587	UGUGUUCUCAGGUCGCCCCUG	UUGUGGCAAUCUGAGGAUACA	Cleavage	PREDICTED: Vigna unguiculata sulfite exporter TauE/SafE family protein 3 (LOC114164672), transcript variant X1, mRNA	1	Transmembrane protein TauE-like	DEO72_LG11g3112	NA	NA	NA	GO:0016021~integral component of membrane
vun-miR398c-3p	XM_028049412.1	3.5	-1	1	21	567	587	UGUGUUCUCAGGUCGCCCCUG	UUGUGGCAAUCUGAGGAUACA	Cleavage	PREDICTED: Vigna unguiculata sulfite exporter TauE/SafE family protein 3 (LOC114164672), transcript variant X2, mRNA	1	Transmembrane protein TauE-like	DEO72_LG11g3112	NA	NA	NA	GO:0016021~integral component of membrane
vun-miR398c-3p	XM_028049437.1	4.5	-1	1	21	830	850	UGUGUUCUCAGGUCGCCCCUG	GAGGGGCGAUUUGAGAUCUUA	Cleavage	PREDICTED: Vigna unguiculata AT-hook motif nuclear-localized protein 10 (LOC114164692), transcript variant X1, mRNA	1	AT hook	DEO72_LG11g3810	NA	GO:0003680~AT DNA binding	NA	NA
vun-miR398c-3p	XM_028049438.1	4.5	-1	1	21	1117	1137	UGUGUUCUCAGGUCGCCCCUG	GAGGGGCGAUUUGAGAUCUUA	Cleavage	PREDICTED: Vigna unguiculata AT-hook motif nuclear-localized protein 10 (LOC114164692), transcript variant X2, mRNA	1	AT hook	DEO72_LG11g3810	NA	GO:0003680~AT DNA binding	NA	NA
vun-miR398c-3p	XM_028050762.1	4.5	-1	1	21	310	330	UGUGUUCUCAGGUCGCCCCUG	GGUGGGUGGCCUGGGGACUCA	Cleavage	PREDICTED: Vigna unguiculata auxin-induced in root cultures protein 12 (LOC114166103), mRNA	1	auxin-induced in root cultures protein 12	LOC106754593	NA	NA	NA	GO:0016021~integral component of membrane
vun-miR398c-3p	XM_028051595.1	4	-1	1	21	126	146	UGUGUUCUCAGGUCGCCCCUG	AGGGUGCGACCUGAGAUCAAA	Cleavage	PREDICTED: Vigna unguiculata cytochrome c oxidase subunit 5b-1, mitochondrial (LOC114166776), mRNA	1	Uncharacterized protein	LR48_Vigan406s012700	Oxidative phosphorylation [00190]	GO:0004129~cytochrome-c oxidase activity	NA	GO:0005740~mitochondrial envelope
vun-miR398c-3p	XM_028052896.1	3.5	-1	1	21	672	692	UGUGUUCUCAGGUCGCCCCUG	AUGGGGCAACUUGGGAGCACU	Cleavage	PREDICTED: Vigna unguiculata choline/ethanolaminephosphotransferase 1-like (LOC114168161), transcript variant X1, mRNA	1	Aminoalcoholphosphotransferase 1 isoform 1	F511_03527	Ether lipid metabolism [00565]; Glycerophospholipid metabolism [00564]; Phosphonate and phosphinate metabolism [00440]	GO:0016780~phosphotransferase activity, for other substituted phosphate groups	GO:0008654~phospholipid biosynthetic process	GO:0016021~integral component of membrane
vun-miR398c-3p	XM_028052897.1	3.5	-1	1	21	670	690	UGUGUUCUCAGGUCGCCCCUG	AUGGGGCAACUUGGGAGCACU	Cleavage	PREDICTED: Vigna unguiculata choline/ethanolaminephosphotransferase 1-like (LOC114168161), transcript variant X2, mRNA	1	Aminoalcoholphosphotransferase 1 isoform 1	F511_03527	Ether lipid metabolism [00565]; Glycerophospholipid metabolism [00564]; Phosphonate and phosphinate metabolism [00440]	GO:0016780~phosphotransferase activity, for other substituted phosphate groups	GO:0008654~phospholipid biosynthetic process	GO:0016021~integral component of membrane
vun-miR398c-3p	XM_028052898.1	3.5	-1	1	21	678	698	UGUGUUCUCAGGUCGCCCCUG	AUGGGGCAACUUGGGAGCACU	Cleavage	PREDICTED: Vigna unguiculata choline/ethanolaminephosphotransferase 1-like (LOC114168161), transcript variant X3, mRNA	1	Aminoalcoholphosphotransferase 1 isoform 1	F511_03527	Ether lipid metabolism [00565]; Glycerophospholipid metabolism [00564]; Phosphonate and phosphinate metabolism [00440]	GO:0016780~phosphotransferase activity, for other substituted phosphate groups	GO:0008654~phospholipid biosynthetic process	GO:0016021~integral component of membrane
vun-miR398c-3p	XM_028053270.1	3.5	-1	1	21	565	585	UGUGUUCUCAGGUCGCCCCUG	AAAGGAGGGCCUGAGAACACA	Cleavage	PREDICTED: Vigna unguiculata putative dehydration-responsive element-binding protein 2H (LOC114168453), transcript variant X1, mRNA	1	EREBP-like factor	DEO72_LG3g2423	Transcription factors [03000]	GO:0003677~DNA binding;GO:0003700~sequence-specific DNA binding transcription factor activity	NA	GO:0005634~nucleus
vun-miR398c-3p	XM_028053271.1	3.5	-1	1	21	554	574	UGUGUUCUCAGGUCGCCCCUG	AAAGGAGGGCCUGAGAACACA	Cleavage	PREDICTED: Vigna unguiculata putative dehydration-responsive element-binding protein 2H (LOC114168453), transcript variant X2, mRNA	1	EREBP-like factor	DEO72_LG3g2423	Transcription factors [03000]	GO:0003677~DNA binding;GO:0003700~sequence-specific DNA binding transcription factor activity	NA	GO:0005634~nucleus
vun-miR398c-3p	XM_028053272.1	3.5	-1	1	21	543	563	UGUGUUCUCAGGUCGCCCCUG	AAAGGAGGGCCUGAGAACACA	Cleavage	PREDICTED: Vigna unguiculata putative dehydration-responsive element-binding protein 2H (LOC114168453), transcript variant X3, mRNA	1	EREBP-like factor	DEO72_LG3g2423	Transcription factors [03000]	GO:0003677~DNA binding;GO:0003700~sequence-specific DNA binding transcription factor activity	NA	GO:0005634~nucleus
vun-miR398c-3p	XM_028053688.1	4.5	-1	1	21	1016	1036	UGUGUUCUCAGGUCGCCCCUG	CACGAGCGGCAUGAGAAUACA	Translation	PREDICTED: Vigna unguiculata homeobox-leucine zipper protein HDG2-like (LOC114168763), transcript variant X1, mRNA	1	Homeobox-leucine zipper protein	DEO72_LG3g2457	Transcription factors [03000]	GO:0008289~lipid binding;GO:0043565~sequence-specific DNA binding	GO:0006355~regulation of transcription, DNA-templated	GO:0005634~nucleus
vun-miR398c-3p	XM_028053689.1	4.5	-1	1	21	1017	1037	UGUGUUCUCAGGUCGCCCCUG	CACGAGCGGCAUGAGAAUACA	Translation	PREDICTED: Vigna unguiculata homeobox-leucine zipper protein HDG2-like (LOC114168763), transcript variant X2, mRNA	1	homeobox-leucine zipper protein HDG2 isoform X1	LOC106756483	Transcription factors [03000]	GO:0008289~lipid binding;GO:0043565~sequence-specific DNA binding	GO:0006355~regulation of transcription, DNA-templated	GO:0005634~nucleus
vun-miR398c-3p	XM_028053690.1	4.5	-1	1	21	1068	1088	UGUGUUCUCAGGUCGCCCCUG	CACGAGCGGCAUGAGAAUACA	Translation	PREDICTED: Vigna unguiculata homeobox-leucine zipper protein HDG2-like (LOC114168763), transcript variant X3, mRNA	1	homeobox-leucine zipper protein HDG2 isoform X1	LOC106756483	Transcription factors [03000]	GO:0008289~lipid binding;GO:0043565~sequence-specific DNA binding	GO:0006355~regulation of transcription, DNA-templated	GO:0005634~nucleus
vun-miR398c-3p	XM_028053808.1	4.5	-1	1	21	1028	1048	UGUGUUCUCAGGUCGCCCCUG	GAGGGGUGAUUGGAGAACUCA	Translation	PREDICTED: Vigna unguiculata zinc finger protein WIP2-like (LOC114168847), transcript variant X1, mRNA	1	C2H2-type domain-containing protein	DEO72_LG3g2959	NA	GO:0003676~nucleic acid binding	NA	NA
vun-miR398c-3p	XM_028053810.1	4.5	-1	1	21	1011	1031	UGUGUUCUCAGGUCGCCCCUG	GAGGGGUGAUUGGAGAACUCA	Translation	PREDICTED: Vigna unguiculata zinc finger protein WIP2-like (LOC114168847), transcript variant X2, mRNA	1	C2H2-type domain-containing protein	DEO72_LG3g2959	NA	GO:0003676~nucleic acid binding	NA	NA
vun-miR398c-3p	XM_028053843.1	4	-1	1	21	401	421	UGUGUUCUCAGGUCGCCCCUG	GAGGGGAUAUCUGAGAAAACA	Cleavage	PREDICTED: Vigna unguiculata protein TIC 62, chloroplastic (LOC114168876), mRNA	1	NADH dehydrogenase	DEO72_LG3g3065	NA	NA	NA	NA
vun-miR398c-3p	XM_028054168.1	3	-1	1	21	1501	1521	UGUGUUCUCAGGUCGCCCCUG	UUCGGCUGACCUGGGAACACA	Cleavage	PREDICTED: Vigna unguiculata putative glycerol-3-phosphate transporter 1 (LOC114169128), mRNA	1	Uncharacterized protein	ES319_A03G070400v1	Transporters [02000]	NA	NA	NA
vun-miR398c-3p	XM_028054169.1	5	-1	1	21	1096	1116	UGUGUUCUCAGGUCGCCCCUG	GAAAGGUGAUUGGAGAACACA	Translation	PREDICTED: Vigna unguiculata zinc finger protein WIP2-like (LOC114169129), mRNA	1	C2H2-type domain-containing protein	DEO72_LG3g30	NA	GO:0003676~nucleic acid binding	NA	NA
vun-miR398c-3p	XM_028054557.1	4.5	-1	1	21	1406	1426	UGUGUUCUCAGGUCGCCCCUG	GAAUGGUGACCUGAGGAUGUA	Cleavage	PREDICTED: Vigna unguiculata uncharacterized LOC114169412 (LOC114169412), mRNA	1	Glycosyl hydrolase	DEO72_LG4g1354	NA	GO:0016787~hydrolase activity	NA	NA
vun-miR398c-3p	XM_028054621.1	4.5	-1	1	21	2014	2034	UGUGUUCUCAGGUCGCCCCUG	GAGAGGCGCCCUGUGAGCACA	Cleavage	PREDICTED: Vigna unguiculata protein DYAD (LOC114169465), mRNA	1	Uncharacterized protein	DEO72_LG3g530	NA	NA	NA	NA
vun-miR398c-3p	XM_028057421.1	5	-1	1	21	1743	1763	UGUGUUCUCAGGUCGCCCCUG	CAGGGGCAAUUUGAAGGCAUA	Cleavage	PREDICTED: Vigna unguiculata DNA polymerase kappa (LOC114173172), transcript variant X1, mRNA	1	DNA polymerase kappa subunit	DEO72_LG4g2875	DNA repair and recombination proteins [03400]	GO:0003684~damaged DNA binding;GO:0003887~DNA-directed DNA polymerase activity	GO:0006281~DNA repair	NA
vun-miR398c-3p	XM_028057422.1	5	-1	1	21	1728	1748	UGUGUUCUCAGGUCGCCCCUG	CAGGGGCAAUUUGAAGGCAUA	Cleavage	PREDICTED: Vigna unguiculata DNA polymerase kappa (LOC114173172), transcript variant X2, mRNA	1	DNA polymerase kappa subunit	DEO72_LG4g2875	DNA repair and recombination proteins [03400]	GO:0003684~damaged DNA binding;GO:0003887~DNA-directed DNA polymerase activity	GO:0006281~DNA repair	NA
vun-miR398c-3p	XM_028057750.1	3.5	-1	1	21	3285	3305	UGUGUUCUCAGGUCGCCCCUG	ACCGGACGGUUUGAGAACACA	Cleavage	PREDICTED: Vigna unguiculata protein EXPORTIN 1A-like (LOC114173388), transcript variant X1, mRNA	1	Exportin-1	DEO72_LG4g2753	RNA transport [03013]; Messenger RNA biogenesis [03019]; Transfer RNA biogenesis [03016]; Chromosome and associated proteins [03036]; Ribosome biogenesis in eukaryotes [03008]; Ribosome biogenesis [03009]	GO:0005049~nuclear export signal receptor activity;GO:0008536~Ran GTPase binding	GO:0006886~intracellular protein transport	GO:0005634~nucleus
vun-miR398c-3p	XM_028058091.1	5	-1	1	21	2041	2061	UGUGUUCUCAGGUCGCCCCUG	GAGGAGUGUUUUGAGAACAUG	Cleavage	PREDICTED: Vigna unguiculata uncharacterized LOC114173603 (LOC114173603), mRNA	1	uncharacterized protein LOC106773250	LOC106773250	NA	GO:0003676~nucleic acid binding;GO:0004190~aspartic-type endopeptidase activity;GO:0008270~zinc ion binding	NA	NA
vun-miR398c-3p	XM_028058092.1	5	-1	1	21	2041	2061	UGUGUUCUCAGGUCGCCCCUG	GAGGAGUGUUUUGAGAACAUG	Cleavage	PREDICTED: Vigna unguiculata uncharacterized LOC114173604 (LOC114173604), mRNA	1	uncharacterized protein LOC106773250	LOC106773250	NA	GO:0003676~nucleic acid binding;GO:0004190~aspartic-type endopeptidase activity;GO:0008270~zinc ion binding	NA	NA
vun-miR398c-3p	XM_028059171.1	5	-1	1	21	1588	1608	UGUGUUCUCAGGUCGCCCCUG	CUGGGGCGACCUGAAGAGGCU	Cleavage	PREDICTED: Vigna unguiculata anaphase-promoting complex subunit 8 (LOC114174335), transcript variant X1, mRNA	1	Anaphase-promoting complex subunit 8	DEO72_LG4g2598	Ubiquitin mediated proteolysis [04120]; Ubiquitin system [04121]; Chromosome and associated proteins [03036]	NA	GO:0030071~regulation of mitotic metaphase/anaphase transition	GO:0005680~anaphase-promoting complex
vun-miR398c-3p	XM_028059172.1	5	-1	1	21	1580	1600	UGUGUUCUCAGGUCGCCCCUG	CUGGGGCGACCUGAAGAGGCU	Cleavage	PREDICTED: Vigna unguiculata anaphase-promoting complex subunit 8 (LOC114174335), transcript variant X2, mRNA	1	Anaphase-promoting complex subunit 8	DEO72_LG4g2598	Ubiquitin mediated proteolysis [04120]; Ubiquitin system [04121]; Chromosome and associated proteins [03036]	NA	GO:0030071~regulation of mitotic metaphase/anaphase transition	GO:0005680~anaphase-promoting complex
vun-miR398c-3p	XM_028060788.1	5	-1	1	21	2330	2350	UGUGUUCUCAGGUCGCCC-CUG	CAGAGGGCGACCUG-GAACACA	Cleavage	PREDICTED: Vigna unguiculata pyruvate, phosphate dikinase, chloroplastic-like (LOC114175936), transcript variant X1, mRNA	1	Pyruvate, phosphate dikinase (EC 2.7.9.1)	DEO72_LG2g234	Carbon fixation in photosynthetic organisms [00710]; Pyruvate metabolism [00620]	GO:0005524~ATP binding;GO:0016301~kinase activity;GO:0046872~metal ion binding;GO:0050242~pyruvate, phosphate dikinase activity	GO:0006090~pyruvate metabolic process	NA
vun-miR398c-3p	XM_028060789.1	5	-1	1	21	2251	2271	UGUGUUCUCAGGUCGCCC-CUG	CAGAGGGCGACCUG-GAACACA	Cleavage	PREDICTED: Vigna unguiculata pyruvate, phosphate dikinase, chloroplastic-like (LOC114175936), transcript variant X2, mRNA	1	Pyruvate, phosphate dikinase (EC 2.7.9.1)	DEO72_LG2g234	Carbon fixation in photosynthetic organisms [00710]; Pyruvate metabolism [00620]	GO:0005524~ATP binding;GO:0016301~kinase activity;GO:0046872~metal ion binding;GO:0050242~pyruvate, phosphate dikinase activity	GO:0006090~pyruvate metabolic process	NA
vun-miR398c-3p	XM_028061774.1	3.5	-1	1	21	1628	1648	UGUGUUCUCAGGUCGCCCCUG	UGGGGGAGAUUUGAGAUCACA	Cleavage	PREDICTED: Vigna unguiculata probable WRKY transcription factor 35 (LOC114176666), mRNA	1	WRKY transcription factor 22	DEO72_LG2g4367	NA	GO:0003700~sequence-specific DNA binding transcription factor activity;GO:0043565~sequence-specific DNA binding	NA	GO:0005634~nucleus
vun-miR398c-3p	XM_028062305.1	5	-1	1	21	315	335	UGUGUUCUCAGGUCGCCCCUG	CGGGUGCGACUUGAGGAUAAU	Cleavage	PREDICTED: Vigna unguiculata inorganic pyrophosphatase 2 (LOC114177073), mRNA	1	Pyridoxal phosphate phosphatase PHOSPHO2	DEO72_LG2g5551	Vitamin B6 metabolism [00750]; Protein phosphatases and associated proteins [01009]	GO:0016791~phosphatase activity;GO:0046872~metal ion binding	NA	NA
vun-miR398c-3p	XM_028062898.1	5	-1	1	21	131	151	UGUGUUCUCAGGUCGCCCCUG	CAGUGGUGACUUGUGAGCACU	Cleavage	PREDICTED: Vigna unguiculata RNA cytidine acetyltransferase 1 (LOC114177523), transcript variant X1, mRNA	1	RNA cytidine acetyltransferase (EC 2.3.1.-) (18S rRNA cytosine acetyltransferase)	DEO72_LG2g5121	Ribosome biogenesis [03009]; Ribosome biogenesis in eukaryotes [03008]	GO:0005524~ATP binding;GO:0008080~N-acetyltransferase activity	GO:0000154~rRNA modification;GO:0042274~ribosomal small subunit biogenesis;GO:0051391~tRNA acetylation	GO:0005730~nucleolus
vun-miR398c-3p	XM_028063170.1	4.5	-1	1	21	2468	2488	UGUGUUCUCAGGUCGCCCCUG	CAGGGGAUGCCUGAGAAGGCA	Cleavage	PREDICTED: Vigna unguiculata pentatricopeptide repeat-containing protein At1g63130, mitochondrial-like (LOC114177699), transcript variant X1, mRNA	1	Structure-specific endonuclease subunit SLX1	DEO72_LG2g3303	NA	GO:0004519~endonuclease activity	NA	NA
vun-miR398c-3p	XM_028063171.1	4.5	-1	1	21	2468	2488	UGUGUUCUCAGGUCGCCCCUG	CAGGGGAUGCCUGAGAAGGCA	Cleavage	PREDICTED: Vigna unguiculata pentatricopeptide repeat-containing protein At1g63130, mitochondrial-like (LOC114177699), transcript variant X2, mRNA	1	Structure-specific endonuclease subunit SLX1	DEO72_LG2g3303	NA	GO:0004519~endonuclease activity	NA	NA
vun-miR398c-3p	XM_028063172.1	4.5	-1	1	21	2468	2488	UGUGUUCUCAGGUCGCCCCUG	CAGGGGAUGCCUGAGAAGGCA	Cleavage	PREDICTED: Vigna unguiculata pentatricopeptide repeat-containing protein At1g63130, mitochondrial-like (LOC114177699), transcript variant X3, mRNA	1	Structure-specific endonuclease subunit SLX1	DEO72_LG2g3303	NA	GO:0004519~endonuclease activity	NA	NA
vun-miR398c-3p	XM_028063173.1	4.5	-1	1	21	2378	2398	UGUGUUCUCAGGUCGCCCCUG	CAGGGGAUGCCUGAGAAGGCA	Cleavage	PREDICTED: Vigna unguiculata pentatricopeptide repeat-containing protein At1g63130, mitochondrial-like (LOC114177699), transcript variant X4, mRNA	1	Structure-specific endonuclease subunit SLX1	DEO72_LG2g3303	NA	GO:0004519~endonuclease activity	NA	NA
vun-miR398c-3p	XM_028063178.1	4	-1	1	21	507	527	UGUGUUCUCAGGUCGCCCCUG	UGGGAGAGGCCUGAGGACAUG	Cleavage	PREDICTED: Vigna unguiculata endoglucanase 17-like (LOC114177702), mRNA	1	Endoglucanase (EC 3.2.1.4)	Vigan.04G392100 VIGAN_04392100	Starch and sucrose metabolism [00500]	GO:0008810~cellulase activity	GO:0030245~cellulose catabolic process	NA
vun-miR398c-3p	XM_028064179.1	4.5	-1	1	21	744	764	UGUGUUCUCAGGUCGCCCCUG	AGGGAGUGAGUUGGGGACACA	Cleavage	PREDICTED: Vigna unguiculata probable protein phosphatase 2C 6 (LOC114178339), mRNA	1	Protein phosphatase 2C	DEO72_LG2g5598	Plant hormone signal transduction [04075]; MAPK signaling pathway - plant [04016]	GO:0004722~protein serine/threonine phosphatase activity;GO:0046872~metal ion binding	NA	NA
vun-miR398c-3p	XM_028064610.1	3.5	-1	1	21	792	812	UGUGUUCUCAGGUCGCCCCUG	ACUUGGCGACCUGGGAACACU	Cleavage	PREDICTED: Vigna unguiculata copper chaperone for superoxide dismutase, chloroplastic/cytosolic (LOC114178604), mRNA	1	Copper chaperone for superoxide dismutase	DEO72_LG2g1577	NA	GO:0046872~metal ion binding	GO:0006801~superoxide metabolic process;GO:0030001~metal ion transport	NA
vun-miR398c-3p	XM_028064656.1	4	-1	1	21	1451	1471	UGUGUUCUCAGGUCGCCCCUG	UGUUGGUGCCCUGAGAACACA	Cleavage	PREDICTED: Vigna unguiculata alcohol dehydrogenase 1B (LOC114178640), mRNA	1	Alcohol dehydrogenase	DEO72_LG2g5263	NA	GO:0008270~zinc ion binding;GO:0016491~oxidoreductase activity	NA	NA
vun-miR398c-3p	XM_028064979.1	4.5	-1	1	21	963	983	UGUGUUCUCAGGUCGCCCCUG	GAGGGCCGAUUUGAGAUUAUA	Cleavage	PREDICTED: Vigna unguiculata AT-hook motif nuclear-localized protein 13-like (LOC114178856), mRNA	1	AT hook	DEO72_LG2g1921	NA	GO:0003680~AT DNA binding	NA	NA
vun-miR398c-3p	XM_028065253.1	4.5	-1	1	21	938	958	UGUGUUCUCAGGUCGCCCCUG	AAGGGGCAGCCAGAGAACGCC	Translation	PREDICTED: Vigna unguiculata serine hydroxymethyltransferase 4-like (LOC114179054), mRNA	1	Serine hydroxymethyltransferase (EC 2.1.2.1)	DEO72_LG2g3946	PATHWAY: One-carbon metabolism; tetrahydrofolate interconversion. {ECO:0000256|RuleBase:RU000585}.; One carbon pool by folate [00670]; Cyanoamino acid metabolism [00460]; Glycine, serine and threonine metabolism [00260]; Glyoxylate and dicarboxylate metabolism [00630]	GO:0004372~glycine hydroxymethyltransferase activity;GO:0008168~methyltransferase activity;GO:0030170~pyridoxal phosphate binding	GO:0019264~glycine biosynthetic process from serine;GO:0032259~methylation;GO:0035999~tetrahydrofolate interconversion	NA
vun-miR398c-3p	XM_028065460.1	5	-1	1	21	839	859	UGUGUUCUCAGGUCGCCCCUG	CAGGGGUUACCAGAGGGUGCA	Translation	PREDICTED: Vigna unguiculata 1-deoxy-D-xylulose 5-phosphate reductoisomerase, chloroplastic (LOC114179211), mRNA	1	1-deoxy-D-xylulose-5-phosphate reductoisomerase	DEO72_LG2g1399	Terpenoid backbone biosynthesis [00900]	GO:0016853~isomerase activity;GO:0030604~1-deoxy-D-xylulose-5-phosphate reductoisomerase activity;GO:0046872~metal ion binding;GO:0070402~NADPH binding	GO:0008299~isoprenoid biosynthetic process	NA
vun-miR398c-3p	XM_028065865.1	5	-1	1	21	1154	1173	UGUGUUCUCAGGUCGCCCCUG	CGGGGGCAAUCUGGGAA-ACA	Cleavage	PREDICTED: Vigna unguiculata threonine synthase, chloroplastic-like (LOC114179507), mRNA	1	Threonine synthase	DEO72_LG2g582	Glycine, serine and threonine metabolism [00260]; Vitamin B6 metabolism [00750]	GO:0030170~pyridoxal phosphate binding	GO:0006520~cellular amino acid metabolic process	NA
vun-miR398c-3p	XM_028065871.1	4.5	-1	1	21	1169	1189	UGUGUUCUCAGGUCGCCCCUG	ACAGGGUGUCUUGAGGAUACA	Cleavage	PREDICTED: Vigna unguiculata branched-chain-amino-acid aminotransferase 2, chloroplastic-like (LOC114179512), transcript variant X1, mRNA	1	Branched-chain-amino-acid aminotransferase (EC 2.6.1.42)	LOC106767843	Amino acid related enzymes [01007]; Valine, leucine and isoleucine biosynthesis [00290]; Cysteine and methionine metabolism [00270]; Valine, leucine and isoleucine degradation [00280]; Pantothenate and CoA biosynthesis [00770]; Glucosinolate biosynthesis [00966]	GO:0052654~L-leucine transaminase activity;GO:0052655~L-valine transaminase activity;GO:0052656~L-isoleucine transaminase activity	GO:0009082~branched-chain amino acid biosynthetic process	NA
vun-miR398c-3p	XM_028065872.1	4.5	-1	1	21	1196	1216	UGUGUUCUCAGGUCGCCCCUG	ACAGGGUGUCUUGAGGAUACA	Cleavage	PREDICTED: Vigna unguiculata branched-chain-amino-acid aminotransferase 2, chloroplastic-like (LOC114179512), transcript variant X2, mRNA	1	Branched-chain-amino-acid aminotransferase (EC 2.6.1.42)	LOC106767843	Amino acid related enzymes [01007]; Valine, leucine and isoleucine biosynthesis [00290]; Cysteine and methionine metabolism [00270]; Valine, leucine and isoleucine degradation [00280]; Pantothenate and CoA biosynthesis [00770]; Glucosinolate biosynthesis [00966]	GO:0052654~L-leucine transaminase activity;GO:0052655~L-valine transaminase activity;GO:0052656~L-isoleucine transaminase activity	GO:0009082~branched-chain amino acid biosynthetic process	NA
vun-miR398c-3p	XM_028065944.1	4	-1	1	21	276	296	UGUGUUCUCAGGUCGCCCCUG	AAGGGGCCACCAGAGAAAACA	Translation	PREDICTED: Vigna unguiculata transcription factor HHO6-like (LOC114179563), transcript variant X1, mRNA	1	Two-component response regulator ARR-B family	DEO72_LG2g3495	NA	GO:0003677~DNA binding	NA	GO:0005634~nucleus
vun-miR398c-3p	XM_028065945.1	4	-1	1	21	279	299	UGUGUUCUCAGGUCGCCCCUG	AAGGGGCCACCAGAGAAAACA	Translation	PREDICTED: Vigna unguiculata transcription factor HHO6-like (LOC114179563), transcript variant X2, mRNA	1	Two-component response regulator ARR-B family	DEO72_LG2g3495	NA	GO:0003677~DNA binding	NA	GO:0005634~nucleus
vun-miR398c-3p	XM_028067451.1	5	-1	1	21	2408	2428	UGUGUUCUCAGGUCGCCCCUG	AGGGGGCGGUUUAAGGUCACA	Cleavage	PREDICTED: Vigna unguiculata serine/threonine-protein kinase BLUS1 (LOC114181106), transcript variant X1, mRNA	1	serine/threonine-protein kinase BLUS1	LOC106770986	Protein kinases [01001]	GO:0004672~protein kinase activity;GO:0005524~ATP binding	NA	NA
vun-miR398c-3p	XM_028067453.1	5	-1	1	21	2506	2526	UGUGUUCUCAGGUCGCCCCUG	AGGGGGCGGUUUAAGGUCACA	Cleavage	PREDICTED: Vigna unguiculata serine/threonine-protein kinase BLUS1 (LOC114181106), transcript variant X2, mRNA	1	serine/threonine-protein kinase BLUS1	LOC106770986	Protein kinases [01001]	GO:0004672~protein kinase activity;GO:0005524~ATP binding	NA	NA
vun-miR398c-3p	XM_028067454.1	5	-1	1	21	2085	2105	UGUGUUCUCAGGUCGCCCCUG	AGGGGGCGGUUUAAGGUCACA	Cleavage	PREDICTED: Vigna unguiculata serine/threonine-protein kinase BLUS1 (LOC114181106), transcript variant X3, mRNA	1	serine/threonine-protein kinase BLUS1	LOC106770986	Protein kinases [01001]	GO:0004672~protein kinase activity;GO:0005524~ATP binding	NA	NA
vun-miR398c-3p	XM_028067455.1	5	-1	1	21	1944	1964	UGUGUUCUCAGGUCGCCCCUG	AGGGGGCGGUUUAAGGUCACA	Cleavage	PREDICTED: Vigna unguiculata serine/threonine-protein kinase BLUS1 (LOC114181106), transcript variant X4, mRNA	1	serine/threonine-protein kinase BLUS1	LOC106770986	Protein kinases [01001]	GO:0004672~protein kinase activity;GO:0005524~ATP binding	NA	NA
vun-miR398c-3p	XM_028067456.1	5	-1	1	21	2042	2062	UGUGUUCUCAGGUCGCCCCUG	AGGGGGCGGUUUAAGGUCACA	Cleavage	PREDICTED: Vigna unguiculata serine/threonine-protein kinase BLUS1 (LOC114181106), transcript variant X5, mRNA	1	serine/threonine-protein kinase BLUS1	LOC106770986	Protein kinases [01001]	GO:0004672~protein kinase activity;GO:0005524~ATP binding	NA	NA
vun-miR398c-3p	XM_028068851.1	4	-1	1	21	229	249	UGUGUUCUCAGGUCGCCCCUG	UGGGGUUGAACUGGGAGCACA	Cleavage	PREDICTED: Vigna unguiculata mannan endo-1,4-beta-mannosidase 2-like (LOC114182095), mRNA	1	Glycoside hydrolase superfamily	DEO72_LG5g2858	Fructose and mannose metabolism [00051]	GO:0004553~hydrolase activity, hydrolyzing O-glycosyl compounds	GO:0005975~carbohydrate metabolic process	GO:0016021~integral component of membrane
vun-miR398c-3p	XM_028069335.1	5	-1	1	21	804	824	UGUGUUCUCAGGUCGCCCCUG	UGUUGGUGACUGGGGAACACA	Translation	PREDICTED: Vigna unguiculata arginine--tRNA ligase, chloroplastic/mitochondrial-like (LOC114182462), transcript variant X1, mRNA	1	Uncharacterized protein	LR48_Vigan10g006200	Transfer RNA biogenesis [03016]; Mitochondrial biogenesis [03029]; Amino acid related enzymes [01007]; Aminoacyl-tRNA biosynthesis [00970]	GO:0004814~arginine-tRNA ligase activity;GO:0005524~ATP binding	GO:0006420~arginyl-tRNA aminoacylation	GO:0005737~cytoplasm
vun-miR398c-3p	XM_028069336.1	5	-1	1	21	779	799	UGUGUUCUCAGGUCGCCCCUG	UGUUGGUGACUGGGGAACACA	Translation	PREDICTED: Vigna unguiculata arginine--tRNA ligase, chloroplastic/mitochondrial-like (LOC114182462), transcript variant X2, mRNA	1	Uncharacterized protein	LR48_Vigan10g006200	Transfer RNA biogenesis [03016]; Mitochondrial biogenesis [03029]; Amino acid related enzymes [01007]; Aminoacyl-tRNA biosynthesis [00970]	GO:0004814~arginine-tRNA ligase activity;GO:0005524~ATP binding	GO:0006420~arginyl-tRNA aminoacylation	GO:0005737~cytoplasm
vun-miR398c-3p	XM_028069918.1	4	-1	1	21	523	543	UGUGUUCUCAGGUCGCCCCUG	GAGGGUUUGCUUGAGAAUACA	Cleavage	PREDICTED: Vigna unguiculata uncharacterized LOC114183067 (LOC114183067), mRNA	1	Disease resistance protein RPS2	DEO72_LG10g3530	NA	NA	NA	NA
vun-miR398c-3p	XM_028070417.1	4.5	-1	1	21	1149	1169	UGUGUUCUCAGGUCGCCCCUG	UGGAGGUGAUCUGAGAGAAUA	Cleavage	PREDICTED: Vigna unguiculata uncharacterized FCP1 homology domain-containing protein C1271.03c-like (LOC114183405), transcript variant X1, mRNA	1	FCP1 homology domain-containing protein	DEO72_LG10g3929	NA	NA	NA	NA
vun-miR398c-3p	XM_028070459.1	4.5	-1	1	21	838	858	UGUGUUCUCAGGUCGCCCCUG	AAUAGGCUACUUGAGAACAUG	Cleavage	PREDICTED: Vigna unguiculata uncharacterized protein K02A2.6-like (LOC114183440), partial mRNA	1	uncharacterized protein LOC106773250	LOC106773250	NA	GO:0003676~nucleic acid binding;GO:0004190~aspartic-type endopeptidase activity;GO:0008270~zinc ion binding	NA	NA
vun-miR398c-3p	XM_028070634.1	5	-1	1	21	930	950	UGUGUUCUCAGGUCGCCCCUG	CAUGAGCGCCAUGAGAACACA	Translation	PREDICTED: Vigna unguiculata homeobox-leucine zipper protein HDG2-like (LOC114183566), mRNA	1	Uncharacterized protein	BRAA10T42649Z	Transcription factors [03000]	GO:0008289~lipid binding;GO:0043565~sequence-specific DNA binding	GO:0006355~regulation of transcription, DNA-templated	GO:0005634~nucleus
vun-miR398c-3p	XM_028071550.1	5	-1	1	21	951	971	UGUGUUCUCAGGUCGCCCCUG	UAGGGGUGAUUGGAGGACCCA	Translation	PREDICTED: Vigna unguiculata zinc finger protein WIP2-like (LOC114184260), mRNA	1	C2H2-type domain-containing protein	DEO72_LG10g391	NA	GO:0003676~nucleic acid binding	NA	NA
vun-miR398c-3p	XM_028072633.1	4.5	-1	1	21	661	681	UGUGUUCUCAGGUCGCCCCUG	GAGGGACAACCUGAGAGUAUU	Cleavage	PREDICTED: Vigna unguiculata dynamin-related protein 1E (LOC114185112), mRNA	1	Dynamin GTPase	DEO72_LG10g2398	NA	GO:0003924~GTPase activity;GO:0005525~GTP binding	NA	NA
vun-miR398c-3p	XM_028074000.1	4	-1	1	21	983	1003	UGUGUUCUCAGGUCGCCCCUG	GAGGGUUUGCUUGAGAAUACA	Cleavage	PREDICTED: Vigna unguiculata uncharacterized LOC114186009 (LOC114186009), mRNA	1	Uncharacterized protein	DEO72_LG10g3528	NA	NA	NA	NA
vun-miR398c-3p	XM_028074094.1	5	-1	1	21	1303	1323	UGUGUUCUCAGGUCGCCCCUG	CAGGGGUGGCCAGAGGAUGUG	Translation	PREDICTED: Vigna unguiculata protein DETOXIFICATION 19-like (LOC114186080), mRNA	1	Protein DETOXIFICATION (Multidrug and toxic compound extrusion protein)	DEO72_LG10g1187	Transporters [02000]	GO:0015297~antiporter activity;GO:0042910~xenobiotic transporter activity	NA	GO:0016021~integral component of membrane
vun-miR398c-3p	XM_028076317.1	3.5	-1	1	21	87	107	UGUGUUCUCAGGUCGCCCCUG	UUGGGGUGCCCUGAGAUCACA	Cleavage	PREDICTED: Vigna unguiculata superoxide dismutase [Cu-Zn] (LOC114187910), transcript variant X1, mRNA	1	Cu/Zn superoxide dismutase	DEO72_LG1g1323	Peroxisome [04146]	GO:0004784~superoxide dismutase activity;GO:0046872~metal ion binding	NA	NA
vun-miR398c-3p	XM_028076795.1	5	-1	1	21	1621	1641	UGUGUUCUCAGGUCGCCCCUG	GAGGGGUUGCCUGAGAAUCCU	Cleavage	PREDICTED: Vigna unguiculata pentatricopeptide repeat-containing protein At3g05340 (LOC114188227), mRNA	1	Structure-specific endonuclease subunit SLX1	DEO72_LG1g1372	NA	GO:0004519~endonuclease activity	NA	NA
[truncated: 2,226 more rows]
