# Supplementary material for: Integrative Small RNA and Transcriptome Analysis Provides Insight Into Key Role of Mir408 Towards Drought Tolerance Response in Cowpea
Source: Research Square preprint supplement (doi:10.21203/rs.3.rs-462359/v1), 2021-05-05
Supplement: Supplementary file 2 [file 7937e700ab4b797cff2bd192.xlsx]

## Sheet: list of primers
Table S1. List of primers used in this study.
A. Oligos and probes used for northern blotting
Primer name	Sequence
vun-miR319f-3p-oligo	TTGGACTGAAGGGGCCTCTT
vun-miR319f-probe	AAGAGGCCCCTTCAGTCCAA
vun-miR167-5p-oligo	TGAAGCTGCCAGCATGATCTA
vun-miR167-5p-probe	TAGATCATGCTGGCAGCTTCA
vun-miR398c-3p-oligo	TGTGTTCTCAGGTCGCCCCTG
vun-miR398c-3p-probe	CAGGGGCGACCTGAGAACACA
vun-miR171m-3p-oligo	TTGAGCCGCGTCAATATCTCA
vun-miR171m-3p-probe	TGAGATATTGACGCGGCTCAA
vun-miR408a-3p-oligo	ATGCACTGCCTCTTCCCTGGC
vun-miR408a-3p-probe	GCCAGGGAAGAGGCAGTGCAT
vun-miR169b-5p-oligo	CAGCCAAGGATGACTTGCCGG
vun-miR169b-5p-probe	CCGGCAAGTCATCCTTGGCTG
vun-miR1514a-5p-oligo	TTCATTTTTAAAATAGGCATT
vun-miR1514a-5p probe	AATGCCTATTTTAAAAATGAA
vun_novel_29 probe	TCGTGCTCTGTCTCTTCCCA
B. Primers for cloning amiR408
Primer A	CTGCAAGGCGATTAAGTTGGGTAAC
Primer B	GCGGATAACAATTTCACACAGGAAACAG
I miR408-s	GAATGCACTGCCTCTTCCCTGGCTCTCTCTTTTGTATTCC
II miR408-a	GAGCCAGGGAAGAGGCAGTGCATTCAAAGAGAATCAATGA
III miR408*s	GAGCAAGGGAAGAGGGAGTGCATTCACAGGTCGTGATATG
IV miR408*a	GAATGCACTCCCTCTTCCCTTGCTCTACATATATATTCCT
C. Primers for real-time analysis
β-tubulin Fw	TTCTGCAACCATGAGTGGGG
β-tubulin Rv	TTGCTGAGACCCACGAGAAG
NAC29 Fw	CGTCTCCACCAGAAGAAGCATC
NAC29 Rv	CAACTACTTTCTTCATCATTATCTAAG
ARF8 Fw	CGTCGACAGGGAGAACGATGTT
ARF8 Rv	GGATTCCACTGCTTGTTCCCCCA
CCS Fw	AGCCAATGAAAATGGTGATGCCTTC
CCS Rv	CACTTCTGGCAATTACTGCGGCA
SCL6 Fw	CCGGTTCATGCGCAAGGGATAT
SCL6 Rv	GAAAGCCATGAAAGTGTGAGGATTT
LAC12 Fw	CTCCAGTGAAGAGGCTGTGCAA
LAC12 Rv	TTGTAACGAGCTTTGTTTGTGACTTT
mcfB Fw	ATCATGGGGTGGCATTGCCTGGATGA
mcfB Rv	CACATCAACAAGGTCTGAAGAGGATTCCG
LAC 3 Fw	CAGCTGCAGAGAATCACTACCAT
LAC 3 Rv	CAGCATTTACTACTTTGATTGCAAGA
Plantacyanin Fw	CAGTGGTTCTCCTACTCTCTCT
Plantacyanin Rv	GGGCCAGGCAACAGTGTTGAA
WRKY75 Fw	TCACGTTAAGCCATCCCAGAAAGTTGG
WRKY75 Rv	CGATATGAACATCTGTAGTAGCTTCTAGGG
NAC62 Fw	GGGTTTTCGCCCCACAGATGAAGAACT
NAC62 Rv	CAGGACTGAAGAAACACCATTCTCGGTC
TTG1 Fw	ATCACCCTTACCCTCCAACC
TTG1 Rv	GCTGGTCTTGCTGTTGTTGA
GIS3 Fw	TTTCCCTATGTTGGCGTTGT
GIS3 Rv	GCAAGGCTAAGGTGCAAGTC
CPRD49 Fw	TAAGGGTTCTGAGGGAAGCA
CPRD49 Rv	ATCCCACTGCAAACACCTTC
Peroxide Fw	AGCCCAACTTCAAGCACTGT
Peroxide Rv	TACTTTGTGTGGCAGGGTCA
D. Primers for 5' RLM-RACE PCR
NAC29 OUTER	TCCACGATATTTGTGTCCTTTTGAG
NAC29 INNER	CAACTACTTTCTTCATCATTATCTAAG
SCL6 OUTER	GAAAGCCATGAAAGTGTGAGGATTT
SCL6 INNER	GAGGATTTGAATGAAGCAGTGACAT
ARF8 OUTER	GGATTCCACTGCTTGTTCCCCCA
ARF8 INNER	CAGGTGAAAGTATTTTGATATACCAA
CCS OUTER	CACTTCTGGCAATTACTGCGGCA
CCS INNER	CAATAAGATCAGCCACCCTCAGCT
PLANTACYANIN OUTER	GGGCCAGGCAACAGTGTTGAA
PLANTACYANIN INNER	CGACTCTGTAGGTGGCAGCAT
LAC3 OUTER	CAGCATTTACTACTTTGATTGCAAGA
LAC 3 INNER	AGAATCTCCATCTCTTGCTTCCA
LAC12 OUTER	TTGTAACGAGCTTTGTTTGTGACTTT
LAC12 INNER	CACGACCAAAGTGTCTCCGTTGTT
mcfB OUTER	CACATCAACAAGGTCTGAAGAGGATTCCG
mcfB INNER	CAGGTGAAGGTAGCCTTAAGTGAGAAGCATACC
RACE OUTER	GCTGATGGCGATGAATGAACACTG
RACE INNER	CGCGGATCCGAACACTGCGTTTGCTGGCTTTGATG
E. Primers for transgenic plant analysis
NPTII Fw	CCACCATGATATTCGGCAA
NPTII Rv	TAGCCGAATAGCCTCTCCAC
GUS Fw	GCCTGTGGGCATTCAGTCTGGATCG
GUS R v	CCTTTGCCACGTAAGTCCGCATCTTC
